# Supplementary material for: Down-Regulation of Collagen Hydroxylation in Colorectal Liver Metastasis
Source: Front Oncol. 2020 Sep 30;10:557737. doi: 10.3389/fonc.2020.557737 (PMC7561380; doi:10.3389/fonc.2020.557737)
Supplement: Supplementary file 1 [file Table_1.xlsx]

## Sheet: Spectrum Report for NvH-1795-CR
			Supplemental S-1 part 1
Biological sample name	Protein name	Protein accession numbers	Protein identification probability	Exclusive unique peptide count	Exclusive unique spectrum count	Total spectrum count	Percentage of total spectra	Percentage sequence coverage	Peptide sequence	Peptide identification probability	Mascot Ion score	Mascot Identity score	Mascot Delta Ion Score	Fixed modifications identified by spectrum	Variable modifications identified by spectrum	Observed m/z	Actual peptide mass (AMU)	Spectrum charge	Actual minus calculated peptide mass (PPM)	Total Ion Current	Other Proteins
Control-1	Actin-related protein 2/3 complex subunit 1B OS=Homo sapiens GN=ARPC1B PE=1 SV=3	O15143	1	1	1	2	2.44e-05	0.0887	STVLSLDWHPNNVLLAAGScDFK	0.997	37.3	28.3	33.9	c20: Carbamidomethyl (+57.02)		848.757	2543.25	3	0.9067	1106430	Q92747
Control-1	Actin-related protein 2/3 complex subunit 1B OS=Homo sapiens GN=ARPC1B PE=1 SV=3	O15143	1	1	1	2	2.44e-05	0.0887	TWKPTLVILR	0.997	54.4	25	32.5			409.592	1225.75	3	-0.6178	450495
Control-1	Apolipoprotein E OS=Homo sapiens GN=APOE PE=1 SV=1	P02649	1	2	2	2	2.44e-05	0.0757	AATVGSLAGQPLQER	0.997	39.5	27.5	39.5			749.405	1496.8	2	0.8266	732134
Control-1	Apolipoprotein E OS=Homo sapiens GN=APOE PE=1 SV=1	P02649	1	2	2	2	2.44e-05	0.0757	LGPLVEQGR	0.997	33.3	25	13.4			484.78	967.545	2	-0.1878	874011
Control-1	Guanine nucleotide-binding protein subunit beta-4 OS=Homo sapiens GN=GNB4 PE=1 SV=3	Q9HAV0	0.778	0	0	3	3.66e-05	0.0971	AGVLAGHDNR	0.997	63	26.1	54.9			505.262	1008.51	2	-0.001923	630323	P62879,P62873
Control-1	Guanine nucleotide-binding protein subunit beta-4 OS=Homo sapiens GN=GNB4 PE=1 SV=3	Q9HAV0	0.778	0	0	3	3.66e-05	0.0971	ELPGHTGYLSccR	0.997	27.8	25	27.8	c11: Carbamidomethyl (+57.02), c12: Carbamidomethyl (+57.02)		517.236	1548.69	3	2.356	1599350	P62879
Control-1	Guanine nucleotide-binding protein subunit beta-4 OS=Homo sapiens GN=GNB4 PE=1 SV=3	Q9HAV0	0.778	0	0	3	3.66e-05	0.0971	LLVSASQDGK	0.997	33.2	26.3	24.2			509.283	1016.55	2	0.686	946976	P16520,P62879,P62873
Control-1	Heat shock 70 kDa protein 6 OS=Homo sapiens GN=HSPA6 PE=1 SV=2	P17066	0.65	0	0	12	0.000146	0.128	ATAGDTHLGGEDFDNR	0.997	40.4	25	40.4			838.37	1674.73	2	1.204	1420650	P0DMV8,P0DMV9,P48741,P34931
Control-1	Heat shock 70 kDa protein 6 OS=Homo sapiens GN=HSPA6 PE=1 SV=2	P17066	0.65	0	0	12	0.000146	0.128	ATAGDTHLGGEDFDNR	0.997	31.7	25	31.7			559.249	1674.72	3	0.2877	1556980	P0DMV8,P0DMV9,P48741,P34931
Control-1	Heat shock 70 kDa protein 6 OS=Homo sapiens GN=HSPA6 PE=1 SV=2	P17066	0.65	0	0	12	0.000146	0.128	IINEPTAAAIAYGLDR	0.997	52.1	27.3	49.6			844.453	1686.89	2	-1.305	1401470	P0DMV8,P0DMV9
Control-1	Heat shock 70 kDa protein 6 OS=Homo sapiens GN=HSPA6 PE=1 SV=2	P17066	0.65	0	0	12	0.000146	0.128	IINEPTAAAIAYGLDR	0.997	64.6	27.2	58.6			844.454	1686.89	2	-0.4396	1259360	P0DMV8,P0DMV9
Control-1	Heat shock 70 kDa protein 6 OS=Homo sapiens GN=HSPA6 PE=1 SV=2	P17066	0.65	0	0	12	0.000146	0.128	IINEPTAAAIAYGLDR	0.997	35	27.2	35			563.305	1686.89	3	-0.455	912395	P0DMV8,P0DMV9
Control-1	Heat shock 70 kDa protein 6 OS=Homo sapiens GN=HSPA6 PE=1 SV=2	P17066	0.65	0	0	12	0.000146	0.128	IINEPTAAAIAYGLDR	0.997	33.4	27.1	33.4			563.305	1686.89	3	-0.01063	594037	P0DMV8,P0DMV9
Control-1	Heat shock 70 kDa protein 6 OS=Homo sapiens GN=HSPA6 PE=1 SV=2	P17066	0.65	0	0	12	0.000146	0.128	ITITNDKGR	0.997	27.7	26.7	11.1			509.288	1016.56	2	0.1946	471712	P11142,P0DMV8,P54652,P0DMV9,P34931
Control-1	Heat shock 70 kDa protein 6 OS=Homo sapiens GN=HSPA6 PE=1 SV=2	P17066	0.65	0	0	12	0.000146	0.128	LLQDFFNGK	0.997	30.4	26.5	23.4			541.287	1080.56	2	-0.3901	624421	P11142,P54652
Control-1	Heat shock 70 kDa protein 6 OS=Homo sapiens GN=HSPA6 PE=1 SV=2	P17066	0.65	0	0	12	0.000146	0.128	STLEPVEK	0.99	23	25.2	20.5			451.745	901.476	2	0.3746	2202810	P0DMV8,P0DMV9,P48741
Control-1	Heat shock 70 kDa protein 6 OS=Homo sapiens GN=HSPA6 PE=1 SV=2	P17066	0.65	0	0	12	0.000146	0.128	TTPSYVAFTDTER	0.997	54.3	25.8	54.3			744.355	1486.7	2	1.061	1142470	P11142,P0DMV8,P54652,P0DMV9,P48741,P34931
Control-1	Heat shock 70 kDa protein 6 OS=Homo sapiens GN=HSPA6 PE=1 SV=2	P17066	0.65	0	0	12	0.000146	0.128	VEILANDQGNR	0.997	45.3	26.7	0			614.818	1227.62	2	-0.1318	1056410	P11021,P11142,P0DMV8,P54652,P0DMV9,P48741,P34931
Control-1	Heat shock 70 kDa protein 6 OS=Homo sapiens GN=HSPA6 PE=1 SV=2	P17066	0.65	0	0	12	0.000146	0.128	VEILANDQGNR	0.997	46	26.7	0			614.818	1227.62	2	0.3565	1044370	P11021,P11142,P0DMV8,P54652,P0DMV9,P48741,P34931
Control-1	Cytoplasmic dynein 1 light intermediate chain 2 OS=Homo sapiens GN=DYNC1LI2 PE=1 SV=1	O43237	1	2	2	2	2.44e-05	0.0671	GGPASVPSSSPGTSVK	0.997	31.8	26.9	31.5			707.863	1413.71	2	0.5076	530346
Control-1	Cytoplasmic dynein 1 light intermediate chain 2 OS=Homo sapiens GN=DYNC1LI2 PE=1 SV=1	O43237	1	2	2	2	2.44e-05	0.0671	TGSPGSPGAGGVQSTAK	0.997	61	27.7	51.4			729.863	1457.71	2	0.3414	207132
Control-1	Major vault protein OS=Homo sapiens GN=MVP PE=1 SV=4	Q14764	1	11	11	11	0.000134	0.179	ALQPLEEGEDEEKVSHQAGDHWLIR	0.984	21.1	28.2	16.8			578.086	2885.4	5	0.3465	1804470
Control-1	Major vault protein OS=Homo sapiens GN=MVP PE=1 SV=4	Q14764	1	11	11	11	0.000134	0.179	AQQLAEVEVKK	0.971	18.2	25.3	13.6			414.907	1241.7	3	0.911	709071
Control-1	Major vault protein OS=Homo sapiens GN=MVP PE=1 SV=4	Q14764	1	11	11	11	0.000134	0.179	DAQGLVLFDVTGQVR	0.997	50.5	27.7	50.5			809.434	1616.85	2	0.9383	1329790
Control-1	Major vault protein OS=Homo sapiens GN=MVP PE=1 SV=4	Q14764	1	11	11	11	0.000134	0.179	DITPLQVVLPNTALHLK	0.997	47.7	25	47.7			624.703	1871.09	3	-0.04698	581448
Control-1	Major vault protein OS=Homo sapiens GN=MVP PE=1 SV=4	Q14764	1	11	11	11	0.000134	0.179	GAVASVTFDDFHK	0.992	24.5	26.6	21.6			465.229	1392.67	3	-0.7878	1027250
Control-1	Major vault protein OS=Homo sapiens GN=MVP PE=1 SV=4	Q14764	1	11	11	11	0.000134	0.179	IEGEGSVLQAK	0.997	35.8	27.6	30.3			565.807	1129.6	2	1.13	1321540
Control-1	Major vault protein OS=Homo sapiens GN=MVP PE=1 SV=4	Q14764	1	11	11	11	0.000134	0.179	KEVEVVEIIQATIIR	0.997	31.7	25	31.7			580.68	1739.02	3	-0.8666	393151
Control-1	Major vault protein OS=Homo sapiens GN=MVP PE=1 SV=4	Q14764	1	11	11	11	0.000134	0.179	LAQDPFPLYPGEVLEK	0.98	20.4	27.4	20.4			908.481	1814.95	2	0.88	1253740
Control-1	Major vault protein OS=Homo sapiens GN=MVP PE=1 SV=4	Q14764	1	11	11	11	0.000134	0.179	QAIPLDENEGIYVQDVK	0.997	46.7	28	46.7			965.992	1929.97	2	-0.09422	397417
Control-1	Major vault protein OS=Homo sapiens GN=MVP PE=1 SV=4	Q14764	1	11	11	11	0.000134	0.179	QMTEAIGPSTIR	0.997	35.7	27.3	34.8			652.338	1302.66	2	1.226	665274
Control-1	Major vault protein OS=Homo sapiens GN=MVP PE=1 SV=4	Q14764	1	11	11	11	0.000134	0.179	SLQPLAPR	0.99	29.3	25	26			441.264	880.513	2	-0.7055	1092550
Control-1	Trifunctional enzyme subunit alpha, mitochondrial OS=Homo sapiens GN=HADHA PE=1 SV=2	P40939	1	9	10	10	0.000122	0.191	DTSASAVAVGLK	0.983	21.3	28.2	17.9			559.806	1117.6	2	0.1413	1231830
Control-1	Trifunctional enzyme subunit alpha, mitochondrial OS=Homo sapiens GN=HADHA PE=1 SV=2	P40939	1	9	10	10	0.000122	0.191	EVEAVIPDHcIFASNTSALPISEIAAVSK	0.995	29.5	27.6	29.5	c10: Carbamidomethyl (+57.02)		1023.53	3067.56	3	3.659	996893
Control-1	Trifunctional enzyme subunit alpha, mitochondrial OS=Homo sapiens GN=HADHA PE=1 SV=2	P40939	1	9	10	10	0.000122	0.191	ILQEGVDPK	0.986	24.1	25	14.5			499.779	997.543	2	-1.424	1350340
Control-1	Trifunctional enzyme subunit alpha, mitochondrial OS=Homo sapiens GN=HADHA PE=1 SV=2	P40939	1	9	10	10	0.000122	0.191	MGLVDQLVEPLGPGLKPPEER	0.993	26.1	26.1	24.4			758.746	2273.22	3	3.237	1238920
Control-1	Trifunctional enzyme subunit alpha, mitochondrial OS=Homo sapiens GN=HADHA PE=1 SV=2	P40939	1	9	10	10	0.000122	0.191	MQLLEIITTEK	0.996	35	26.6	22.7			659.871	1317.73	2	3.684	1056130
Control-1	Trifunctional enzyme subunit alpha, mitochondrial OS=Homo sapiens GN=HADHA PE=1 SV=2	P40939	1	9	10	10	0.000122	0.191	SEVSSDEDIQFR	0.997	40.3	25	40.3			706.32	1410.63	2	-0.4689	1096880
Control-1	Trifunctional enzyme subunit alpha, mitochondrial OS=Homo sapiens GN=HADHA PE=1 SV=2	P40939	1	9	10	10	0.000122	0.191	TGIEQGSDAGYLcESQK	0.997	62.6	25	62.6	c13: Carbamidomethyl (+57.02)		921.914	1841.81	2	2.102	430893
Control-1	Trifunctional enzyme subunit alpha, mitochondrial OS=Homo sapiens GN=HADHA PE=1 SV=2	P40939	1	9	10	10	0.000122	0.191	TLQEVTQLSQEAQR	0.993	28.5	27.8	26.9			815.921	1629.83	2	-2.54	714426
Control-1	Trifunctional enzyme subunit alpha, mitochondrial OS=Homo sapiens GN=HADHA PE=1 SV=2	P40939	1	9	10	10	0.000122	0.191	TVLGTPEVLLGALPGAGGTQR	0.997	45.4	25	45.4			1004.06	2006.11	2	-1.117	608598
Control-1	Trifunctional enzyme subunit alpha, mitochondrial OS=Homo sapiens GN=HADHA PE=1 SV=2	P40939	1	9	10	10	0.000122	0.191	TVLGTPEVLLGALPGAGGTQR	0.997	50.1	25	45			669.713	2006.12	3	1.097	1208380
Control-1	Guanine nucleotide-binding protein G(i) subunit alpha-1 OS=Homo sapiens GN=GNAI1 PE=1 SV=2	P63096	0.319	0	0	3	3.66e-05	0.102	EIYTHFTcATDTK	0.976	17.9	25	17.9	c8: Carbamidomethyl (+57.02)		529.577	1585.71	3	0.6345	1585480	P04899,P08754
Control-1	Guanine nucleotide-binding protein G(i) subunit alpha-1 OS=Homo sapiens GN=GNAI1 PE=1 SV=2	P63096	0.319	0	0	3	3.66e-05	0.102	LLLLGAGESGK	0.997	40.3	25	0			529.316	1056.62	2	-0.02075	4016510	P04899,P09471,P63092,Q5JWF2,P08754,Q14344
Control-1	Guanine nucleotide-binding protein G(i) subunit alpha-1 OS=Homo sapiens GN=GNAI1 PE=1 SV=2	P63096	0.319	0	0	3	3.66e-05	0.102	TTGIVETHFTFK	0.997	47.8	27.9	41.8			460.91	1379.71	3	-0.7517	1408830	P04899,P09471,P08754
Control-1	Leukocyte elastase inhibitor OS=Homo sapiens GN=SERPINB1 PE=1 SV=1	P30740	1	4	5	5	6.1e-05	0.164	EATTNAPFR	0.997	39.7	27.2	34.4			503.752	1005.49	2	0.6538	1013090
Control-1	Leukocyte elastase inhibitor OS=Homo sapiens GN=SERPINB1 PE=1 SV=1	P30740	1	4	5	5	6.1e-05	0.164	LHEWTKPENLDFIEVNVSLPR	0.979	22.6	27.3	21.4			634.836	2535.32	4	1.769	804486
Control-1	Leukocyte elastase inhibitor OS=Homo sapiens GN=SERPINB1 PE=1 SV=1	P30740	1	4	5	5	6.1e-05	0.164	TFHFNTVEEVHSR	0.991	75.2	27	69.4			401.447	1601.76	4	-0.8198	1430140
Control-1	Leukocyte elastase inhibitor OS=Homo sapiens GN=SERPINB1 PE=1 SV=1	P30740	1	4	5	5	6.1e-05	0.164	TYGADLASVDFQHASEDAR	0.997	70.5	25	70.5			684.981	2051.92	3	0.5807	1792900
Control-1	Leukocyte elastase inhibitor OS=Homo sapiens GN=SERPINB1 PE=1 SV=1	P30740	1	4	5	5	6.1e-05	0.164	TYGADLASVDFQHASEDAR	0.997	53.4	25	53.4			1026.97	2051.92	2	0.3498	295056
Control-1	Cytochrome b5 OS=Homo sapiens GN=CYB5A PE=1 SV=2	P00167	1	3	3	3	3.66e-05	0.358	EQAGGDATENFEDVGHSTDAR	0.99	79.2	25	79.2			735.982	2204.92	3	1.578	1638540
Control-1	Cytochrome b5 OS=Homo sapiens GN=CYB5A PE=1 SV=2	P00167	1	3	3	3	3.66e-05	0.358	FLEEHPGGEEVLR	0.997	29.9	27.2	27			504.588	1510.74	3	-0.1309	2039780
Control-1	Cytochrome b5 OS=Homo sapiens GN=CYB5A PE=1 SV=2	P00167	1	3	3	3	3.66e-05	0.358	TFIIGELHPDDRPK	0.997	31.2	27.8	31.2			410.222	1636.86	4	-0.03293	922568
Control-1	Alpha-actinin-1 OS=Homo sapiens GN=ACTN1 PE=1 SV=2	P12814	1	28	45	79	0.000964	0.619	AGTQIENIEEDFR	0.997	59.3	26.5	53.1			761.362	1520.71	2	-0.4481	1452400	Q08043,P35609
Control-1	Alpha-actinin-1 OS=Homo sapiens GN=ACTN1 PE=1 SV=2	P12814	1	28	45	79	0.000964	0.619	AGTQIENIEEDFRDGLK	0.989	65.3	27.2	65.3			967.974	1933.93	2	-2.533	503131
Control-1	Alpha-actinin-1 OS=Homo sapiens GN=ACTN1 PE=1 SV=2	P12814	1	28	45	79	0.000964	0.619	AIMTYVSSFYHAFSGAQK	0.997	54.5	27.6	54.5			669.994	2006.96	3	2.212	5082770	O43707
Control-1	Alpha-actinin-1 OS=Homo sapiens GN=ACTN1 PE=1 SV=2	P12814	1	28	45	79	0.000964	0.619	AIMTYVSSFYHAFSGAQK	0.997	63.1	27.5	63.1			1004.49	2006.96	2	0.4572	719659	O43707
Control-1	Alpha-actinin-1 OS=Homo sapiens GN=ACTN1 PE=1 SV=2	P12814	1	28	45	79	0.000964	0.619	ALDFIASK	0.99	40	25.9	30.5			432.745	863.475	2	0.09029	910054	Q08043,O43707
Control-1	Alpha-actinin-1 OS=Homo sapiens GN=ACTN1 PE=1 SV=2	P12814	1	28	45	79	0.000964	0.619	ASIHEAWTDGK	0.996	26.9	25	21.6			405.531	1213.57	3	-1.991	1042580	O43707
Control-1	Alpha-actinin-1 OS=Homo sapiens GN=ACTN1 PE=1 SV=2	P12814	1	28	45	79	0.000964	0.619	ATLPDADKER	0.997	52.4	26.6	39.4			558.288	1114.56	2	0.1417	3452710
Control-1	Alpha-actinin-1 OS=Homo sapiens GN=ACTN1 PE=1 SV=2	P12814	1	28	45	79	0.000964	0.619	cQLEINFNTLQTK	0.997	42.8	28	37.8	c1: Carbamidomethyl (+57.02)		804.908	1607.8	2	1.674	1622120	Q08043,O43707,P35609
Control-1	Alpha-actinin-1 OS=Homo sapiens GN=ACTN1 PE=1 SV=2	P12814	1	28	45	79	0.000964	0.619	DDPLTNLNTAFDVAEK	0.996	25.4	26.7	25.4			588.288	1761.84	3	-0.07825	392343
Control-1	Alpha-actinin-1 OS=Homo sapiens GN=ACTN1 PE=1 SV=2	P12814	1	28	45	79	0.000964	0.619	DDPLTNLNTAFDVAEK	0.997	60.1	26.9	54			881.93	1761.85	2	1.803	830945
Control-1	Alpha-actinin-1 OS=Homo sapiens GN=ACTN1 PE=1 SV=2	P12814	1	28	45	79	0.000964	0.619	DGLGFcALIHR	0.997	33.7	26.8	30.8	c6: Carbamidomethyl (+57.02)		420.216	1257.63	3	-1.607	534849
Control-1	Alpha-actinin-1 OS=Homo sapiens GN=ACTN1 PE=1 SV=2	P12814	1	28	45	79	0.000964	0.619	DGLGFcALIHR	0.997	36.9	26.8	34.5	c6: Carbamidomethyl (+57.02)		420.217	1257.63	3	0.49	416171
Control-1	Alpha-actinin-1 OS=Homo sapiens GN=ACTN1 PE=1 SV=2	P12814	1	28	45	79	0.000964	0.619	EGLLLWcQR	0.997	39.4	27.8	29.1	c7: Carbamidomethyl (+57.02)		587.806	1173.6	2	0.113	2818750	Q08043,O43707,P35609
Control-1	Alpha-actinin-1 OS=Homo sapiens GN=ACTN1 PE=1 SV=2	P12814	1	28	45	79	0.000964	0.619	ELPPDQAEYcIAR	0.979	19.3	25.9	18.9	c10: Carbamidomethyl (+57.02)		781.37	1560.73	2	0.6485	2316990	O43707
Control-1	Alpha-actinin-1 OS=Homo sapiens GN=ACTN1 PE=1 SV=2	P12814	1	28	45	79	0.000964	0.619	ELPPDQAEYcIAR	0.997	26.3	25.9	24.1	c10: Carbamidomethyl (+57.02)		781.37	1560.72	2	0.1747	1046700	O43707
Control-1	Alpha-actinin-1 OS=Homo sapiens GN=ACTN1 PE=1 SV=2	P12814	1	28	45	79	0.000964	0.619	ELPPDQAEYcIAR	0.997	51.2	25.8	47.7	c10: Carbamidomethyl (+57.02)		781.37	1560.73	2	0.7253	1904420	O43707
Control-1	Alpha-actinin-1 OS=Homo sapiens GN=ACTN1 PE=1 SV=2	P12814	1	28	45	79	0.000964	0.619	ETADTDTADQVMASFK	0.996	71.6	25	67.2			865.383	1728.75	2	-0.3017	2499850
Control-1	Alpha-actinin-1 OS=Homo sapiens GN=ACTN1 PE=1 SV=2	P12814	1	28	45	79	0.000964	0.619	ETADTDTADQVmASFK	0.997	44.8	25	12.4		m12: Oxidation (+15.99)	873.381	1744.75	2	0.7922	1084420
Control-1	Alpha-actinin-1 OS=Homo sapiens GN=ACTN1 PE=1 SV=2	P12814	1	28	45	79	0.000964	0.619	ETADTDTADQVMASFK	0.997	43.4	25	43.4			865.383	1728.75	2	0.4036	748925
Control-1	Alpha-actinin-1 OS=Homo sapiens GN=ACTN1 PE=1 SV=2	P12814	1	28	45	79	0.000964	0.619	ETADTDTADQVMASFK	0.997	37.8	25	37.8			577.258	1728.75	3	-0.2358	1307400
Control-1	Alpha-actinin-1 OS=Homo sapiens GN=ACTN1 PE=1 SV=2	P12814	1	28	45	79	0.000964	0.619	FAIQDISVEETSAK	0.996	46.8	27.7	46.8			769.393	1536.77	2	2.73	1149410	Q08043,O43707,P35609
Control-1	Alpha-actinin-1 OS=Homo sapiens GN=ACTN1 PE=1 SV=2	P12814	1	28	45	79	0.000964	0.619	GISQEQMNEFR	0.997	32.9	25	32.9			669.809	1337.6	2	0.2824	12241400
Control-1	Alpha-actinin-1 OS=Homo sapiens GN=ACTN1 PE=1 SV=2	P12814	1	28	45	79	0.000964	0.619	GYEEWLLNEIR	0.997	43.5	27.8	37.3			711.356	1420.7	2	-0.9861	1164110	O43707,P35609
Control-1	Alpha-actinin-1 OS=Homo sapiens GN=ACTN1 PE=1 SV=2	P12814	1	28	45	79	0.000964	0.619	GYEEWLLNEIR	0.997	45.7	27.7	36			474.573	1420.7	3	-0.301	443609	O43707,P35609
Control-1	Alpha-actinin-1 OS=Homo sapiens GN=ACTN1 PE=1 SV=2	P12814	1	28	45	79	0.000964	0.619	HEAFESDLAAHQDRVEQIAAIAQELNELDYYDSPSVNAR	0.976	23.7	26.3	20.7			1104.52	4414.07	4	-1.448	641066
Control-1	Alpha-actinin-1 OS=Homo sapiens GN=ACTN1 PE=1 SV=2	P12814	1	28	45	79	0.000964	0.619	HRPELIDYGK	0.993	24.6	26.7	18.1			409.887	1226.64	3	-0.5115	2058660
Control-1	Alpha-actinin-1 OS=Homo sapiens GN=ACTN1 PE=1 SV=2	P12814	1	28	45	79	0.000964	0.619	HRPELIDYGK	0.997	27.7	26.7	23.9			614.328	1226.64	2	0.1939	784278
Control-1	Alpha-actinin-1 OS=Homo sapiens GN=ACTN1 PE=1 SV=2	P12814	1	28	45	79	0.000964	0.619	HTNYTMEHIR	0.997	30.6	25	30.6			651.306	1300.6	2	-1.338	761025	O43707,P35609
Control-1	Alpha-actinin-1 OS=Homo sapiens GN=ACTN1 PE=1 SV=2	P12814	1	28	45	79	0.000964	0.619	HTNYTmEHIR	0.997	33.8	25	33.8		m6: Oxidation (+15.99)	439.872	1316.59	3	1.25	791028	O43707,P35609
Control-1	Alpha-actinin-1 OS=Homo sapiens GN=ACTN1 PE=1 SV=2	P12814	1	28	45	79	0.000964	0.619	HTNYTMEHIR	0.997	36.8	25	30.9			434.539	1300.6	3	-1.965	1150920	O43707,P35609
Control-1	Alpha-actinin-1 OS=Homo sapiens GN=ACTN1 PE=1 SV=2	P12814	1	28	45	79	0.000964	0.619	IcDQWDNLGALTQK	0.99	58	27.1	55.2	c2: Carbamidomethyl (+57.02)		831.405	1660.8	2	4.376	1205690
Control-1	Alpha-actinin-1 OS=Homo sapiens GN=ACTN1 PE=1 SV=2	P12814	1	28	45	79	0.000964	0.619	IcDQWDNLGALTQK	0.997	26.6	27	24.8	c2: Carbamidomethyl (+57.02)		554.604	1660.79	3	1.057	1425200
Control-1	Alpha-actinin-1 OS=Homo sapiens GN=ACTN1 PE=1 SV=2	P12814	1	28	45	79	0.000964	0.619	IcDQWDNLGALTQK	0.997	33.3	26.7	32.4	c2: Carbamidomethyl (+57.02)		831.401	1660.79	2	-0.4015	743492
Control-1	Alpha-actinin-1 OS=Homo sapiens GN=ACTN1 PE=1 SV=2	P12814	1	28	45	79	0.000964	0.619	IDQLEGDHQLIQEALIFDNK	0.997	56.3	28	56.3			1170.1	2338.18	2	0.4352	360508
Control-1	Alpha-actinin-1 OS=Homo sapiens GN=ACTN1 PE=1 SV=2	P12814	1	28	45	79	0.000964	0.619	IDQLEGDHQLIQEALIFDNK	0.997	48.7	28	43			780.401	2338.18	3	0.08638	1689500
Control-1	Alpha-actinin-1 OS=Homo sapiens GN=ACTN1 PE=1 SV=2	P12814	1	28	45	79	0.000964	0.619	IDQLEGDHQLIQEALIFDNK	0.997	41.8	27.9	41.8			780.402	2338.18	3	0.7918	1223560
Control-1	Alpha-actinin-1 OS=Homo sapiens GN=ACTN1 PE=1 SV=2	P12814	1	28	45	79	0.000964	0.619	ILAGDKNYITMDELR	0.997	55.5	28	47.4			876.454	1750.89	2	0.06739	687953
Control-1	Alpha-actinin-1 OS=Homo sapiens GN=ACTN1 PE=1 SV=2	P12814	1	28	45	79	0.000964	0.619	ILAGDKNYITMDELR	0.997	33.3	28.2	31.7			584.639	1750.89	3	0.7604	5729340
Control-1	Alpha-actinin-1 OS=Homo sapiens GN=ACTN1 PE=1 SV=2	P12814	1	28	45	79	0.000964	0.619	IMSIVDPNR	0.997	28.1	26.6	27			522.778	1043.54	2	-1.208	2699460
Control-1	Alpha-actinin-1 OS=Homo sapiens GN=ACTN1 PE=1 SV=2	P12814	1	28	45	79	0.000964	0.619	ISIEMHGTLEDQLSHLR	0.993	67.3	28.6	58.4			990.003	1977.99	2	-1.719	460783
Control-1	Alpha-actinin-1 OS=Homo sapiens GN=ACTN1 PE=1 SV=2	P12814	1	28	45	79	0.000964	0.619	ISIEMHGTLEDQLSHLR	0.997	56.7	28.5	49.3			660.339	1977.99	3	0.06673	2149640
Control-1	Alpha-actinin-1 OS=Homo sapiens GN=ACTN1 PE=1 SV=2	P12814	1	28	45	79	0.000964	0.619	ISIEMHGTLEDQLSHLR	0.997	42.5	28.5	40.5			495.506	1977.99	4	-0.3102	1156120
Control-1	Alpha-actinin-1 OS=Homo sapiens GN=ACTN1 PE=1 SV=2	P12814	1	28	45	79	0.000964	0.619	ISIEmHGTLEDQLSHLR	0.997	47.9	28.3	43.4		m5: Oxidation (+15.99)	499.505	1993.99	4	0.3364	1761940
Control-1	Alpha-actinin-1 OS=Homo sapiens GN=ACTN1 PE=1 SV=2	P12814	1	28	45	79	0.000964	0.619	IVQTYHVNMAGTNPYTTITPQEINGK	0.997	48.9	28.3	46			964.152	2889.43	3	0.1322	492055
Control-1	Alpha-actinin-1 OS=Homo sapiens GN=ACTN1 PE=1 SV=2	P12814	1	28	45	79	0.000964	0.619	KAGTQIENIEEDFR	0.997	35.3	27.8	35.3			550.61	1648.81	3	0.8135	1715040	Q08043,P35609
Control-1	Alpha-actinin-1 OS=Homo sapiens GN=ACTN1 PE=1 SV=2	P12814	1	28	45	79	0.000964	0.619	KAGTQIENIEEDFRDGLK	0.997	35.8	28	30.2			516.515	2062.03	4	-1.228	891022
Control-1	Alpha-actinin-1 OS=Homo sapiens GN=ACTN1 PE=1 SV=2	P12814	1	28	45	79	0.000964	0.619	KAGTQIENIEEDFRDGLK	0.997	46.6	28.2	45.2			688.352	2062.04	3	0.762	948611
Control-1	Alpha-actinin-1 OS=Homo sapiens GN=ACTN1 PE=1 SV=2	P12814	1	28	45	79	0.000964	0.619	KAGTQIENIEEDFRDGLK	0.997	34	28.1	30.4			688.352	2062.03	3	0.413	2448560
Control-1	Alpha-actinin-1 OS=Homo sapiens GN=ACTN1 PE=1 SV=2	P12814	1	28	45	79	0.000964	0.619	KDDPLTNLNTAFDVAEK	0.981	73.7	28	73.7			945.979	1889.94	2	3.024	823377
Control-1	Alpha-actinin-1 OS=Homo sapiens GN=ACTN1 PE=1 SV=2	P12814	1	28	45	79	0.000964	0.619	KDDPLTNLNTAFDVAEK	0.997	40.1	28.1	40.1			630.987	1889.94	3	0.1756	5343200
Control-1	Alpha-actinin-1 OS=Homo sapiens GN=ACTN1 PE=1 SV=2	P12814	1	28	45	79	0.000964	0.619	KHEAFESDLAAHQDR	0.992	66.4	26.7	62.3			877.419	1752.82	2	2.793	245720	O43707,P35609
Control-1	Alpha-actinin-1 OS=Homo sapiens GN=ACTN1 PE=1 SV=2	P12814	1	28	45	79	0.000964	0.619	KQFGAQANVIGPWIQTK	0.997	30.9	26.2	30.9			943.519	1885.02	2	1.134	444747
Control-1	Alpha-actinin-1 OS=Homo sapiens GN=ACTN1 PE=1 SV=2	P12814	1	28	45	79	0.000964	0.619	KTFTAWcNSHLR	0.997	38.8	27.8	35.8	c7: Carbamidomethyl (+57.02)		507.586	1519.74	3	-0.2454	1427260	Q08043,O43707,P35609
Control-1	Alpha-actinin-1 OS=Homo sapiens GN=ACTN1 PE=1 SV=2	P12814	1	28	45	79	0.000964	0.619	LAILGIHNEVSK	0.997	26.9	25	23.4			431.922	1292.75	3	-0.2303	1561150
Control-1	Alpha-actinin-1 OS=Homo sapiens GN=ACTN1 PE=1 SV=2	P12814	1	28	45	79	0.000964	0.619	LASDLLEWIR	0.997	43.9	26.4	39.3			608.341	1214.67	2	1.841	448871	O43707
Control-1	Alpha-actinin-1 OS=Homo sapiens GN=ACTN1 PE=1 SV=2	P12814	1	28	45	79	0.000964	0.619	LASDLLEWIRR	0.997	33.2	25.8	24.9			457.93	1370.77	3	-0.2974	335088	O43707
Control-1	Alpha-actinin-1 OS=Homo sapiens GN=ACTN1 PE=1 SV=2	P12814	1	28	45	79	0.000964	0.619	LLETIDQLYLEYAKR	0.997	34.9	25.4	32.7			623.345	1867.01	3	1.393	532140
Control-1	Alpha-actinin-1 OS=Homo sapiens GN=ACTN1 PE=1 SV=2	P12814	1	28	45	79	0.000964	0.619	LmLLLEVISGER	0.997	51.3	25.9	43.7		m2: Oxidation (+15.99)	694.896	1387.78	2	1.63	758138	Q08043,O43707,P35609
Control-1	Alpha-actinin-1 OS=Homo sapiens GN=ACTN1 PE=1 SV=2	P12814	1	28	45	79	0.000964	0.619	LRKDDPLTNLNTAFDVAEK	0.989	23.9	27.9	23.9			720.716	2159.13	3	1.168	1262550
Control-1	Alpha-actinin-1 OS=Homo sapiens GN=ACTN1 PE=1 SV=2	P12814	1	28	45	79	0.000964	0.619	LRKDDPLTNLNTAFDVAEK	0.997	42.8	28	36.7			540.787	2159.12	4	-0.812	1107790
Control-1	Alpha-actinin-1 OS=Homo sapiens GN=ACTN1 PE=1 SV=2	P12814	1	28	45	79	0.000964	0.619	mLDAEDIVGTARPDEK	0.979	20.1	26.9	20.1		m1: Oxidation (+15.99)	592.621	1774.84	3	-0.2044	1024740
Control-1	Alpha-actinin-1 OS=Homo sapiens GN=ACTN1 PE=1 SV=2	P12814	1	28	45	79	0.000964	0.619	MLDAEDIVGTARPDEK	0.996	58.7	27.2	58.7			880.432	1758.85	2	2.351	775702
Control-1	Alpha-actinin-1 OS=Homo sapiens GN=ACTN1 PE=1 SV=2	P12814	1	28	45	79	0.000964	0.619	MLDAEDIVGTARPDEK	0.997	43.7	27.1	43.7			587.289	1758.85	3	-0.1409	3933560
Control-1	Alpha-actinin-1 OS=Homo sapiens GN=ACTN1 PE=1 SV=2	P12814	1	28	45	79	0.000964	0.619	MVSDINNAWGcLEQVEK	0.996	73.9	25.7	73.9	c11: Carbamidomethyl (+57.02)		996.962	1991.91	2	0.8895	566231
Control-1	Alpha-actinin-1 OS=Homo sapiens GN=ACTN1 PE=1 SV=2	P12814	1	28	45	79	0.000964	0.619	MVSDINNAWGcLEQVEK	0.997	35.4	25.6	35.4	c11: Carbamidomethyl (+57.02)		664.977	1991.91	3	0.2744	861048
Control-1	Alpha-actinin-1 OS=Homo sapiens GN=ACTN1 PE=1 SV=2	P12814	1	28	45	79	0.000964	0.619	NVNIQNFHISWK	0.982	23.4	27.3	18			500.597	1498.77	3	1.675	1988530
Control-1	Alpha-actinin-1 OS=Homo sapiens GN=ACTN1 PE=1 SV=2	P12814	1	28	45	79	0.000964	0.619	QFGAQANVIGPWIQTK	0.997	28.2	27.1	26.6			586.649	1756.92	3	-0.744	1172910
Control-1	Alpha-actinin-1 OS=Homo sapiens GN=ACTN1 PE=1 SV=2	P12814	1	28	45	79	0.000964	0.619	QKDYETATLSEIK	0.977	20	27.9	14.3			509.263	1524.77	3	0.1652	4097550
Control-1	Alpha-actinin-1 OS=Homo sapiens GN=ACTN1 PE=1 SV=2	P12814	1	28	45	79	0.000964	0.619	RDQALTEEHAR	0.997	62.9	27.1	49.3			663.332	1324.65	2	0.6925	170059
Control-1	Alpha-actinin-1 OS=Homo sapiens GN=ACTN1 PE=1 SV=2	P12814	1	28	45	79	0.000964	0.619	RDQALTEEHAR	0.997	54.8	26.7	44.4			442.557	1324.65	3	-0.01353	1180000
Control-1	Alpha-actinin-1 OS=Homo sapiens GN=ACTN1 PE=1 SV=2	P12814	1	28	45	79	0.000964	0.619	TFTAWcNSHLR	0.988	21.6	25.5	21.2	c6: Carbamidomethyl (+57.02)		464.888	1391.64	3	0.5147	3211790	Q08043,O43707,P35609
Control-1	Alpha-actinin-1 OS=Homo sapiens GN=ACTN1 PE=1 SV=2	P12814	1	28	45	79	0.000964	0.619	TFTAWcNSHLR	0.997	31.6	25.3	31.6	c6: Carbamidomethyl (+57.02)		696.829	1391.64	2	2.048	1181910	Q08043,O43707,P35609
Control-1	Alpha-actinin-1 OS=Homo sapiens GN=ACTN1 PE=1 SV=2	P12814	1	28	45	79	0.000964	0.619	TINEVENQILTR	0.972	24.1	27.7	16.7			477.259	1428.76	3	-1.474	1199830	O43707
Control-1	Alpha-actinin-1 OS=Homo sapiens GN=ACTN1 PE=1 SV=2	P12814	1	28	45	79	0.000964	0.619	TINEVENQILTR	0.997	56.7	27.8	50.6			715.385	1428.76	2	-1.078	1252240	O43707
Control-1	Alpha-actinin-1 OS=Homo sapiens GN=ACTN1 PE=1 SV=2	P12814	1	28	45	79	0.000964	0.619	TINEVENQILTR	0.997	56.7	27.4	49.7			715.386	1428.76	2	0.4603	1279060	O43707
Control-1	Alpha-actinin-1 OS=Homo sapiens GN=ACTN1 PE=1 SV=2	P12814	1	28	45	79	0.000964	0.619	TIPWLENR	0.976	18.1	25	14			514.78	1027.55	2	0.212	1256470	P35609
Control-1	Alpha-actinin-1 OS=Homo sapiens GN=ACTN1 PE=1 SV=2	P12814	1	28	45	79	0.000964	0.619	VGWEQLLTTIAR	0.997	63.7	26	57.9			693.891	1385.77	2	0.2294	7900280	O43707
Control-1	Alpha-actinin-1 OS=Homo sapiens GN=ACTN1 PE=1 SV=2	P12814	1	28	45	79	0.000964	0.619	VLAVNQENEQLMEDYEK	0.997	32.7	26.8	32.7			684.659	2050.95	3	1.068	1325190
Control-1	Alpha-actinin-1 OS=Homo sapiens GN=ACTN1 PE=1 SV=2	P12814	1	28	45	79	0.000964	0.619	VPENTMHAMQQK	0.981	19.5	25	16.4			707.334	1412.65	2	-0.1004	249746
Control-1	Malate dehydrogenase, mitochondrial OS=Homo sapiens GN=MDH2 PE=1 SV=3	P40926	1	12	15	15	0.000183	0.467	AGAGSATLSMAYAGAR	0.989	81.9	26.7	79.1			727.857	1453.7	2	1.236	1240970
Control-1	Malate dehydrogenase, mitochondrial OS=Homo sapiens GN=MDH2 PE=1 SV=3	P40926	1	12	15	15	0.000183	0.467	ANTFVAELK	0.997	67.7	26.6	60			496.774	991.534	2	0.401	3121900
Control-1	Malate dehydrogenase, mitochondrial OS=Homo sapiens GN=MDH2 PE=1 SV=3	P40926	1	12	15	15	0.000183	0.467	EGVVEcSFVK	0.993	24.4	26.2	23.4	c6: Carbamidomethyl (+57.02)		577.282	1152.55	2	1.398	1754360
Control-1	Malate dehydrogenase, mitochondrial OS=Homo sapiens GN=MDH2 PE=1 SV=3	P40926	1	12	15	15	0.000183	0.467	FVFSLVDAMNGK	0.995	76.7	27.1	76.7			664.34	1326.67	2	0.7367	661671
Control-1	Malate dehydrogenase, mitochondrial OS=Homo sapiens GN=MDH2 PE=1 SV=3	P40926	1	12	15	15	0.000183	0.467	GYLGPEQLPDcLK	0.996	31.5	27.2	28.7	c11: Carbamidomethyl (+57.02)		745.37	1488.73	2	-1.978	1350740
Control-1	Malate dehydrogenase, mitochondrial OS=Homo sapiens GN=MDH2 PE=1 SV=3	P40926	1	12	15	15	0.000183	0.467	IFGVTTLDIVR	0.997	48.5	25	44.3			617.364	1232.71	2	-0.06642	741833
Control-1	Malate dehydrogenase, mitochondrial OS=Homo sapiens GN=MDH2 PE=1 SV=3	P40926	1	12	15	15	0.000183	0.467	IQEAGTEVVK	0.997	33.7	27.9	18.3			537.297	1072.58	2	1.88	799129
Control-1	Malate dehydrogenase, mitochondrial OS=Homo sapiens GN=MDH2 PE=1 SV=3	P40926	1	12	15	15	0.000183	0.467	LTLYDIAHTPGVAADLSHIETK	0.997	54.9	26.7	54.9			789.087	2364.24	3	2.17	1891940
Control-1	Malate dehydrogenase, mitochondrial OS=Homo sapiens GN=MDH2 PE=1 SV=3	P40926	1	12	15	15	0.000183	0.467	LTLYDIAHTPGVAADLSHIETK	0.997	45.9	26.7	44.8			592.066	2364.23	4	0.7213	1507210
Control-1	Malate dehydrogenase, mitochondrial OS=Homo sapiens GN=MDH2 PE=1 SV=3	P40926	1	12	15	15	0.000183	0.467	SQETEcTYFSTPLLLGK	0.997	70.2	27.9	70.2	c6: Carbamidomethyl (+57.02)		987.48	1972.95	2	0.3003	1148090
Control-1	Malate dehydrogenase, mitochondrial OS=Homo sapiens GN=MDH2 PE=1 SV=3	P40926	1	12	15	15	0.000183	0.467	TIIPLISQcTPK	0.997	39.5	25.1	34.3	c9: Carbamidomethyl (+57.02)		685.889	1369.76	2	0.1114	1796490
Control-1	Malate dehydrogenase, mitochondrial OS=Homo sapiens GN=MDH2 PE=1 SV=3	P40926	1	12	15	15	0.000183	0.467	VDFPQDQLTALTGR	0.997	29.6	27.7	24.8			520.94	1559.8	3	1.302	465137
Control-1	Malate dehydrogenase, mitochondrial OS=Homo sapiens GN=MDH2 PE=1 SV=3	P40926	1	12	15	15	0.000183	0.467	VDFPQDQLTALTGR	0.997	36.9	27.8	34.9			780.905	1559.8	2	0.3063	1350390
Control-1	Malate dehydrogenase, mitochondrial OS=Homo sapiens GN=MDH2 PE=1 SV=3	P40926	1	12	15	15	0.000183	0.467	VNVPVIGGHAGK	0.984	20.1	25	20.1			383.225	1146.65	3	0.6553	1908530
Control-1	Malate dehydrogenase, mitochondrial OS=Homo sapiens GN=MDH2 PE=1 SV=3	P40926	1	12	15	15	0.000183	0.467	VNVPVIGGHAGK	0.997	38	25	34.7			574.333	1146.65	2	1.096	1228520
Control-1	Malate dehydrogenase, cytoplasmic OS=Homo sapiens GN=MDH1 PE=1 SV=4	P40925	1	9	12	12	0.000146	0.311	DLDVAILVGSMPR	0.994	55.3	26.9	53.4			462.586	1384.74	3	-1.738	325089
Control-1	Malate dehydrogenase, cytoplasmic OS=Homo sapiens GN=MDH1 PE=1 SV=4	P40925	1	9	12	12	0.000146	0.311	DLDVAILVGSMPR	0.997	55.7	26.1	50.1			693.377	1384.74	2	0.3161	848570
Control-1	Malate dehydrogenase, cytoplasmic OS=Homo sapiens GN=MDH1 PE=1 SV=4	P40925	1	9	12	12	0.000146	0.311	DLDVAILVGSmPR	0.997	43.7	27.1	7.44		m11: Oxidation (+15.99)	701.374	1400.73	2	0.2875	1186900
Control-1	Malate dehydrogenase, cytoplasmic OS=Homo sapiens GN=MDH1 PE=1 SV=4	P40925	1	9	12	12	0.000146	0.311	ENFScLTR	0.99	29.2	25	23	c5: Carbamidomethyl (+57.02)		513.737	1025.46	2	-0.1045	2215570
Control-1	Malate dehydrogenase, cytoplasmic OS=Homo sapiens GN=MDH1 PE=1 SV=4	P40925	1	9	12	12	0.000146	0.311	ESAFEFLSSA	0.968	16.8	25	13.7			544.251	1086.49	2	0.2557	385262
Control-1	Malate dehydrogenase, cytoplasmic OS=Homo sapiens GN=MDH1 PE=1 SV=4	P40925	1	9	12	12	0.000146	0.311	EVGVYEALKDDSWLK	0.985	22.7	28.1	13.8			876.447	1750.88	2	1.072	709759
Control-1	Malate dehydrogenase, cytoplasmic OS=Homo sapiens GN=MDH1 PE=1 SV=4	P40925	1	9	12	12	0.000146	0.311	EVGVYEALKDDSWLK	0.994	28.1	27.8	26			584.632	1750.87	3	-2.031	791208
Control-1	Malate dehydrogenase, cytoplasmic OS=Homo sapiens GN=MDH1 PE=1 SV=4	P40925	1	9	12	12	0.000146	0.311	FVEGLPINDFSR	0.997	44.7	27.6	41.9			697.359	1392.7	2	-0.8194	1651770
Control-1	Malate dehydrogenase, cytoplasmic OS=Homo sapiens GN=MDH1 PE=1 SV=4	P40925	1	9	12	12	0.000146	0.311	GEFVTTVQQR	0.997	27.1	27.7	26.5			582.805	1163.59	2	1.08	4419860
Control-1	Malate dehydrogenase, cytoplasmic OS=Homo sapiens GN=MDH1 PE=1 SV=4	P40925	1	9	12	12	0.000146	0.311	KLSSAMSAAK	0.997	42.8	26.6	32.2			497.274	992.532	2	-0.02208	1199980
Control-1	Malate dehydrogenase, cytoplasmic OS=Homo sapiens GN=MDH1 PE=1 SV=4	P40925	1	9	12	12	0.000146	0.311	LGVTANDVK	0.979	21	25.8	15.6			458.758	915.502	2	-0.5477	1098770
Control-1	Malate dehydrogenase, cytoplasmic OS=Homo sapiens GN=MDH1 PE=1 SV=4	P40925	1	9	12	12	0.000146	0.311	VIVVGNPANTNcLTASK	0.997	64.3	27.7	62.4	c12: Carbamidomethyl (+57.02)		879.466	1756.92	2	1.418	617189
Control-1	Keratin, type I cytoskeletal 16 OS=Homo sapiens GN=KRT16 PE=1 SV=4	P08779	0.709	0	0	5	6.1e-05	0.0846	LEQEIATYR	0.997	50.4	28	39			561.793	1121.57	2	0.08735	1705520	P08727,P13646,Q04695,P02533,P35900
Control-1	Keratin, type I cytoskeletal 16 OS=Homo sapiens GN=KRT16 PE=1 SV=4	P08779	0.709	0	0	5	6.1e-05	0.0846	TDLEMQIEGLK	0.997	54.2	28	43.8			638.827	1275.64	2	0.1238	982752	P08727
Control-1	Keratin, type I cytoskeletal 16 OS=Homo sapiens GN=KRT16 PE=1 SV=4	P08779	0.709	0	0	5	6.1e-05	0.0846	TRLEQEIATYR	0.997	37.3	27.4	27.3			460.581	1378.72	3	-0.3681	1293510	P13646,Q04695,P02533,P35900
Control-1	Keratin, type I cytoskeletal 16 OS=Homo sapiens GN=KRT16 PE=1 SV=4	P08779	0.709	0	0	5	6.1e-05	0.0846	VLDELTLAR	0.997	36.8	25	28.4			515.301	1028.59	2	0.7168	1053640	P08727,Q04695,P02533
Control-1	Keratin, type I cytoskeletal 16 OS=Homo sapiens GN=KRT16 PE=1 SV=4	P08779	0.709	0	0	5	6.1e-05	0.0846	VTMQNLNDR	0.997	39.3	26.7	31.8			545.769	1089.52	2	0.4567	1159900	P13645,P02533
Control-1	HLA class I histocompatibility antigen, Cw-7 alpha chain OS=Homo sapiens GN=HLA-C PE=1 SV=3	P10321	0.73	0	0	5	6.1e-05	0.172	DGEDQTQDTELVETRPAGDGTFQK	0.997	30.2	25.5	30.2			879.736	2636.19	3	1.059	824958	P01891,P05534,P30501,P30512,P30459,P04439,Q9TNN7,P13746,P18462,P30453,P30443,Q07000,Q95604,P16190,P01893,P01892
Control-1	HLA class I histocompatibility antigen, Cw-7 alpha chain OS=Homo sapiens GN=HLA-C PE=1 SV=3	P10321	0.73	0	0	5	6.1e-05	0.172	FDSDAASPR	0.997	28.9	25.1	21.5			483.22	964.426	2	0.578	947970	P30501,P03989,P30460,P18465,P30464,Q07000,P30510,Q29718,P30490,P01889,Q95604
Control-1	HLA class I histocompatibility antigen, Cw-7 alpha chain OS=Homo sapiens GN=HLA-C PE=1 SV=3	P10321	0.73	0	0	5	6.1e-05	0.172	SWTAADTAAQITQR	0.992	75.1	28	66.4			760.38	1518.75	2	1.604	941036	P30479,P30501,P01889,P30460,Q07000,P30510
Control-1	HLA class I histocompatibility antigen, Cw-7 alpha chain OS=Homo sapiens GN=HLA-C PE=1 SV=3	P10321	0.73	0	0	5	6.1e-05	0.172	SWTAADTAAQITQR	0.997	57.4	27.9	44.9			507.255	1518.74	3	0.8173	831128	P30479,P30501,P01889,P30460,Q07000,P30510
Control-1	HLA class I histocompatibility antigen, Cw-7 alpha chain OS=Homo sapiens GN=HLA-C PE=1 SV=3	P10321	0.73	0	0	5	6.1e-05	0.172	THVTHHPLSDHEATLR	0.997	36.8	28.6	0			463.487	1849.92	4	-0.8287	887976	P30479,P13747,P03989,P30460,P30461,P18465,P30464,P30487,P30488,Q29718,P01889
Control-1	Heat shock protein beta-6 OS=Homo sapiens GN=HSPB6 PE=1 SV=2	O14558	1	6	10	10	0.000122	0.7	APSVALPVAQVPTDPGHFSVLLDVK	0.997	39.2	25	39.2			640.107	2556.4	4	0.5733	1109070
Control-1	Heat shock protein beta-6 OS=Homo sapiens GN=HSPB6 PE=1 SV=2	O14558	1	6	10	10	0.000122	0.7	ASAPLPGLSAPGR	0.997	44.4	25.6	44.4			597.337	1192.66	2	2.378	1715950
Control-1	Heat shock protein beta-6 OS=Homo sapiens GN=HSPB6 PE=1 SV=2	O14558	1	6	10	10	0.000122	0.7	HEERPDEHGFVAR	0.974	19.4	26	19.4			526.918	1577.73	3	-0.3724	651427
Control-1	Heat shock protein beta-6 OS=Homo sapiens GN=HSPB6 PE=1 SV=2	O14558	1	6	10	10	0.000122	0.7	HEERPDEHGFVAR	0.995	26.1	25.9	25.6			395.44	1577.73	4	-1.542	2185120
Control-1	Heat shock protein beta-6 OS=Homo sapiens GN=HSPB6 PE=1 SV=2	O14558	1	6	10	10	0.000122	0.7	HEERPDEHGFVAR	0.997	38.6	25.7	38.1			789.875	1577.73	2	0.5688	161638
Control-1	Heat shock protein beta-6 OS=Homo sapiens GN=HSPB6 PE=1 SV=2	O14558	1	6	10	10	0.000122	0.7	HFSPEEIAVK	0.997	41.6	27.5	35.5			578.804	1155.59	2	0.2404	2052180
Control-1	Heat shock protein beta-6 OS=Homo sapiens GN=HSPB6 PE=1 SV=2	O14558	1	6	10	10	0.000122	0.7	VVGEHVEVHAR	0.966	18.8	28.6	14.4			411.223	1230.65	3	-0.1445	1079930
Control-1	Heat shock protein beta-6 OS=Homo sapiens GN=HSPB6 PE=1 SV=2	O14558	1	6	10	10	0.000122	0.7	VVGEHVEVHAR	0.997	68.8	28.6	58.6			616.331	1230.65	2	0.1608	458351
Control-1	Heat shock protein beta-6 OS=Homo sapiens GN=HSPB6 PE=1 SV=2	O14558	1	6	10	10	0.000122	0.7	YRLPPGVDPAAVTSALSPEGVLSIQAAPASAQAPPPAAAK	0.997	32.2	25	32.2			960.018	3836.04	4	-1.145	592697
Control-1	Heat shock protein beta-6 OS=Homo sapiens GN=HSPB6 PE=1 SV=2	O14558	1	6	10	10	0.000122	0.7	YRLPPGVDPAAVTSALSPEGVLSIQAAPASAQAPPPAAAK	0.997	48.4	25	48.4			1279.69	3836.05	3	0.6807	280694
Control-1	Aldose reductase OS=Homo sapiens GN=AKR1B1 PE=1 SV=3	P15121	0.991	1	1	2	2.44e-05	0.057	MPILGLGTWK	0.997	33.3	26.6	0			558.317	1114.62	2	-0.9698	650797	P14550
Control-1	Aldose reductase OS=Homo sapiens GN=AKR1B1 PE=1 SV=3	P15121	0.991	1	1	2	2.44e-05	0.057	VAIDVGYR	0.984	21	27	16.7			446.748	891.482	2	0.5581	1421650
Control-1	Serine/threonine-protein phosphatase PP1-gamma catalytic subunit OS=Homo sapiens GN=PPP1CC PE=1 SV=1	P36873	0.683	0	0	6	7.32e-05	0.108	AHQVVEDGYEFFAK	0.997	26.6	26.3	26.6			820.391	1638.77	2	-0.3427	771668	P62140,P62136
Control-1	Serine/threonine-protein phosphatase PP1-gamma catalytic subunit OS=Homo sapiens GN=PPP1CC PE=1 SV=1	P36873	0.683	0	0	6	7.32e-05	0.108	AHQVVEDGYEFFAK	0.997	34.2	26.3	34.2			547.263	1638.77	3	-0.6452	2041570	P62140,P62136
Control-1	Serine/threonine-protein phosphatase PP1-gamma catalytic subunit OS=Homo sapiens GN=PPP1CC PE=1 SV=1	P36873	0.683	0	0	6	7.32e-05	0.108	AHQVVEDGYEFFAK	0.997	37.5	26.3	37.5			547.263	1638.77	3	-0.4256	1131420	P62140,P62136
Control-1	Serine/threonine-protein phosphatase PP1-gamma catalytic subunit OS=Homo sapiens GN=PPP1CC PE=1 SV=1	P36873	0.683	0	0	6	7.32e-05	0.108	GNHEcASINR	0.997	25	25	25	c5: Carbamidomethyl (+57.02)		386.509	1156.5	3	-0.2101	805327	P62140,P62136
Control-1	Serine/threonine-protein phosphatase PP1-gamma catalytic subunit OS=Homo sapiens GN=PPP1CC PE=1 SV=1	P36873	0.683	0	0	6	7.32e-05	0.108	GNHEcASINR	0.997	36	25	30.4	c5: Carbamidomethyl (+57.02)		579.26	1156.5	2	0.443	468330	P62140,P62136
Control-1	Serine/threonine-protein phosphatase PP1-gamma catalytic subunit OS=Homo sapiens GN=PPP1CC PE=1 SV=1	P36873	0.683	0	0	6	7.32e-05	0.108	IKYPENFFLLR	0.997	63.3	25	41.4			480.607	1438.8	3	0.4182	797124	P62140,P62136
Control-1	Phosphoglucomutase-1 OS=Homo sapiens GN=PGM1 PE=1 SV=3	P36871	1	4	4	4	4.88e-05	0.0925	LSGTGSAGATIR	0.997	59	27.8	54.8			545.797	1089.58	2	1.795	665426
Control-1	Phosphoglucomutase-1 OS=Homo sapiens GN=PGM1 PE=1 SV=3	P36871	1	4	4	4	4.88e-05	0.0925	LSLcGEESFGTGSDHIR	0.997	48.1	25.5	46.2	c4: Carbamidomethyl (+57.02)		622.288	1863.84	3	-0.731	1220210
Control-1	Phosphoglucomutase-1 OS=Homo sapiens GN=PGM1 PE=1 SV=3	P36871	1	4	4	4	4.88e-05	0.0925	SMPTSGALDR	0.997	26.5	25.1	21.7			517.75	1033.49	2	0.05612	1230170
Control-1	Phosphoglucomutase-1 OS=Homo sapiens GN=PGM1 PE=1 SV=3	P36871	1	4	4	4	4.88e-05	0.0925	YDYEEVEAEGANK	0.997	26.3	25	26.3			758.826	1515.64	2	-0.00128	981387
Control-1	Annexin A5 OS=Homo sapiens GN=ANXA5 PE=1 SV=2	P08758	1	10	10	10	0.000122	0.341	ADAETLRK	0.99	31.5	27.2	19			452.248	902.482	2	-0.7327	791134
Control-1	Annexin A5 OS=Homo sapiens GN=ANXA5 PE=1 SV=2	P08758	1	10	10	10	0.000122	0.341	ALLLLcGEDD	0.974	18.3	26	13.2	c6: Carbamidomethyl (+57.02)		559.774	1117.53	2	0.08293	1664400
Control-1	Annexin A5 OS=Homo sapiens GN=ANXA5 PE=1 SV=2	P08758	1	10	10	10	0.000122	0.341	FITIFGTR	0.99	29.3	25	20.7			477.774	953.534	2	0.6684	1614910
Control-1	Annexin A5 OS=Homo sapiens GN=ANXA5 PE=1 SV=2	P08758	1	10	10	10	0.000122	0.341	GAGTDDHTLIR	0.997	37.5	26.1	26.9			578.292	1154.57	2	0.4829	1050470
Control-1	Annexin A5 OS=Homo sapiens GN=ANXA5 PE=1 SV=2	P08758	1	10	10	10	0.000122	0.341	GLGTDEESILTLLTSR	0.981	91.6	28.2	91.6			852.956	1703.9	2	1.313	5759240
Control-1	Annexin A5 OS=Homo sapiens GN=ANXA5 PE=1 SV=2	P08758	1	10	10	10	0.000122	0.341	GTVTDFPGFDER	0.989	22.1	25	22.1			670.81	1339.6	2	0.02839	1280610
Control-1	Annexin A5 OS=Homo sapiens GN=ANXA5 PE=1 SV=2	P08758	1	10	10	10	0.000122	0.341	QVYEEEYGSSLEDDVVGDTSGYYQR	0.988	88.9	25	88.9			1444.62	2887.23	2	0.2001	176123
Control-1	Annexin A5 OS=Homo sapiens GN=ANXA5 PE=1 SV=2	P08758	1	10	10	10	0.000122	0.341	SEIDLFNIR	0.997	37.3	27.4	37.3			553.796	1105.58	2	0.01632	1187530
Control-1	Annexin A5 OS=Homo sapiens GN=ANXA5 PE=1 SV=2	P08758	1	10	10	10	0.000122	0.341	SEIDLFNIRK	0.976	22.5	27.7	20.6			412.231	1233.67	3	-0.8083	604265
Control-1	Annexin A5 OS=Homo sapiens GN=ANXA5 PE=1 SV=2	P08758	1	10	10	10	0.000122	0.341	VLTEIIASR	0.997	31.1	25	27.3			501.304	1000.59	2	0.9166	2305750
Control-1	Guanine nucleotide-binding protein G(k) subunit alpha OS=Homo sapiens GN=GNAI3 PE=1 SV=3	P08754	0.997	1	1	4	4.88e-05	0.144	EIYTHFTcATDTK	0.976	17.9	25	17.9	c8: Carbamidomethyl (+57.02)		529.577	1585.71	3	0.6345	1585480	P04899,P63096
Control-1	Guanine nucleotide-binding protein G(k) subunit alpha OS=Homo sapiens GN=GNAI3 PE=1 SV=3	P08754	0.997	1	1	4	4.88e-05	0.144	ISQSNYIPTQQDVLR	0.993	25.8	28.2	21.9			881.462	1760.91	2	1.656	572977
Control-1	Guanine nucleotide-binding protein G(k) subunit alpha OS=Homo sapiens GN=GNAI3 PE=1 SV=3	P08754	0.997	1	1	4	4.88e-05	0.144	LLLLGAGESGK	0.997	40.3	25	0			529.316	1056.62	2	-0.02075	4016510	P04899,P63096,P09471,P63092,Q5JWF2,Q14344
Control-1	Guanine nucleotide-binding protein G(k) subunit alpha OS=Homo sapiens GN=GNAI3 PE=1 SV=3	P08754	0.997	1	1	4	4.88e-05	0.144	TTGIVETHFTFK	0.997	47.8	27.9	41.8			460.91	1379.71	3	-0.7517	1408830	P04899,P63096,P09471
Control-1	Ras-related protein R-Ras OS=Homo sapiens GN=RRAS PE=1 SV=1	P10301	1	6	6	8	9.77e-05	0.394	DRDDFPVVLVGNK	0.99	24	27.8	17.6			491.928	1472.76	3	-0.3718	703213
Control-1	Ras-related protein R-Ras OS=Homo sapiens GN=RRAS PE=1 SV=1	P10301	1	6	6	8	9.77e-05	0.394	IcSVDGIPAR	0.997	31.8	26.9	25.1	c2: Carbamidomethyl (+57.02)		544.282	1086.55	2	-0.04344	1554070
Control-1	Ras-related protein R-Ras OS=Homo sapiens GN=RRAS PE=1 SV=1	P10301	1	6	6	8	9.77e-05	0.394	LDILDTAGQEEFGAMR	0.994	72.8	26.7	72.8			883.424	1764.83	2	-0.7713	1012740	P62070
Control-1	Ras-related protein R-Ras OS=Homo sapiens GN=RRAS PE=1 SV=1	P10301	1	6	6	8	9.77e-05	0.394	LNVDEAFEQLVR	0.997	68.3	28	68.3			716.875	1431.74	2	-0.2945	912641
Control-1	Ras-related protein R-Ras OS=Homo sapiens GN=RRAS PE=1 SV=1	P10301	1	6	6	8	9.77e-05	0.394	LRLNVDEAFEQLVR	0.997	34.6	26.5	28.2			567.981	1700.92	3	0.7298	459990
Control-1	Ras-related protein R-Ras OS=Homo sapiens GN=RRAS PE=1 SV=1	P10301	1	6	6	8	9.77e-05	0.394	LVVVGGGGVGK	0.997	38.2	25	35.5			471.293	940.571	2	0.4015	1100190	P62070
Control-1	Ras-related protein R-Ras OS=Homo sapiens GN=RRAS PE=1 SV=1	P10301	1	6	6	8	9.77e-05	0.394	SEASAFGASHHVAYFEASAK	0.997	36.8	26.2	36.8			689.658	2065.95	3	1.307	862191
Control-1	Ras-related protein R-Ras OS=Homo sapiens GN=RRAS PE=1 SV=1	P10301	1	6	6	8	9.77e-05	0.394	VKDRDDFPVVLVGNK	0.997	28.6	26.1	23.6			567.649	1699.93	3	-0.2751	2054430
Control-1	Cullin-associated NEDD8-dissociated protein 1 OS=Homo sapiens GN=CAND1 PE=1 SV=2	Q86VP6	1	3	3	4	4.88e-05	0.0431	EGPAVVGQFIQDVK	0.978	19.7	27.4	19.7			743.899	1485.78	2	0.3888	860741
Control-1	Cullin-associated NEDD8-dissociated protein 1 OS=Homo sapiens GN=CAND1 PE=1 SV=2	Q86VP6	1	3	3	4	4.88e-05	0.0431	LTLIDPETLLPR	0.997	24.8	25	24.8			690.909	1379.8	2	0.4911	502513
Control-1	Cullin-associated NEDD8-dissociated protein 1 OS=Homo sapiens GN=CAND1 PE=1 SV=2	Q86VP6	1	3	3	4	4.88e-05	0.0431	MTSSDKDFR	0.99	21.9	25	19.9			543.748	1085.48	2	0.3664	269143
Control-1	Cullin-associated NEDD8-dissociated protein 1 OS=Homo sapiens GN=CAND1 PE=1 SV=2	Q86VP6	1	3	3	4	4.88e-05	0.0431	VIRPLDQPSSFDATPYIK	0.997	28.9	27.9	28.2			683.033	2046.08	3	-0.8001	1455660
Control-1	Histone H2A type 1-C OS=Homo sapiens GN=HIST1H2AC PE=1 SV=3	Q93077	1	1	2	6	7.32e-05	0.3	AGLQFPVGR	0.988	23.2	26.1	20.1			472.769	943.524	2	-0.4467	698102	Q96KK5,Q8IUE6,P0C0S8,Q16777,Q9BTM1,P0C0S5,Q71UI9,Q99878,P16104
Control-1	Histone H2A type 1-C OS=Homo sapiens GN=HIST1H2AC PE=1 SV=3	Q93077	1	1	2	6	7.32e-05	0.3	AGLQFPVGR	0.997	40.7	26.1	36.2			472.769	943.524	2	0.08264	27066500	Q96KK5,Q8IUE6,P0C0S8,Q16777,Q9BTM1,P0C0S5,Q71UI9,Q99878,P16104
Control-1	Histone H2A type 1-C OS=Homo sapiens GN=HIST1H2AC PE=1 SV=3	Q93077	1	1	2	6	7.32e-05	0.3	NDEELNKLLGR	0.997	53.1	27.5	45.1			434.233	1299.68	3	-0.0753	868832
Control-1	Histone H2A type 1-C OS=Homo sapiens GN=HIST1H2AC PE=1 SV=3	Q93077	1	1	2	6	7.32e-05	0.3	NDEELNKLLGR	0.997	55.7	27.5	48.8			650.846	1299.68	2	-0.01687	1085120
Control-1	Histone H2A type 1-C OS=Homo sapiens GN=HIST1H2AC PE=1 SV=3	Q93077	1	1	2	6	7.32e-05	0.3	VTIAQGGVLPNIQAVLLPK	0.994	23.4	25	23.4			966.089	1930.16	2	0.6204	2330140	Q96KK5,P0C0S8,Q16777,Q9BTM1,Q99878
Control-1	Histone H2A type 1-C OS=Homo sapiens GN=HIST1H2AC PE=1 SV=3	Q93077	1	1	2	6	7.32e-05	0.3	VTIAQGGVLPNIQAVLLPK	0.997	38.7	25	38.7			644.395	1930.16	3	0.6121	1286910	Q96KK5,P0C0S8,Q16777,Q9BTM1,Q99878
Control-1	Tubulin beta-1 chain OS=Homo sapiens GN=TUBB1 PE=1 SV=1	Q9H4B7	0.427	0	0	8	9.77e-05	0.0466	FPGQLNADLR	0.997	40.6	27.1	29.3			565.801	1129.59	2	-1.134	1312080	P07437,Q13885,Q9BUF5,Q3ZCM7,A6NNZ2,Q9BVA1,Q13509,P04350,P68371
Control-1	Tubulin beta-1 chain OS=Homo sapiens GN=TUBB1 PE=1 SV=1	Q9H4B7	0.427	0	0	8	9.77e-05	0.0466	FPGQLNADLR	0.997	51.5	27.1	43.2			565.801	1129.59	2	-0.4793	3309390	P07437,Q13885,Q9BUF5,Q3ZCM7,A6NNZ2,Q9BVA1,Q13509,P04350,P68371
Control-1	Tubulin beta-1 chain OS=Homo sapiens GN=TUBB1 PE=1 SV=1	Q9H4B7	0.427	0	0	8	9.77e-05	0.0466	FPGQLNADLRK	0.997	26.5	27.2	20.5			420.235	1257.68	3	-0.332	1384470	P07437,Q13885,Q9BUF5,Q3ZCM7,A6NNZ2,Q9BVA1,Q13509,P04350,P68371
Control-1	Tubulin beta-1 chain OS=Homo sapiens GN=TUBB1 PE=1 SV=1	Q9H4B7	0.427	0	0	8	9.77e-05	0.0466	KLAVNMVPFPR	0.997	32.8	25	28.1			424.581	1270.72	3	-0.6589	1956640	P07437,Q13885,Q9BUF5,Q3ZCM7,A6NNZ2,Q9BVA1,Q13509,P04350,P68371
Control-1	Tubulin beta-1 chain OS=Homo sapiens GN=TUBB1 PE=1 SV=1	Q9H4B7	0.427	0	0	8	9.77e-05	0.0466	KLAVNMVPFPR	0.997	34.7	25	31.4			636.368	1270.72	2	-0.2374	1527480	P07437,Q13885,Q9BUF5,Q3ZCM7,A6NNZ2,Q9BVA1,Q13509,P04350,P68371
Control-1	Tubulin beta-1 chain OS=Homo sapiens GN=TUBB1 PE=1 SV=1	Q9H4B7	0.427	0	0	8	9.77e-05	0.0466	LAVNmVPFPR	0.991	23.6	27.3	19.6		m5: Oxidation (+15.99)	580.319	1158.62	2	0.796	1083570	P07437,Q13885,Q9BUF5,Q3ZCM7,A6NNZ2,Q9BVA1,Q13509,P04350,P68371
Control-1	Tubulin beta-1 chain OS=Homo sapiens GN=TUBB1 PE=1 SV=1	Q9H4B7	0.427	0	0	8	9.77e-05	0.0466	LAVNmVPFPR	0.997	33.7	27.9	24.6		m5: Oxidation (+15.99)	580.318	1158.62	2	-0.1526	1164290	P07437,Q13885,Q9BUF5,Q3ZCM7,A6NNZ2,Q9BVA1,Q13509,P04350,P68371
Control-1	Tubulin beta-1 chain OS=Homo sapiens GN=TUBB1 PE=1 SV=1	Q9H4B7	0.427	0	0	8	9.77e-05	0.0466	LAVNMVPFPR	0.997	39.2	26.7	26.8			572.32	1142.63	2	-0.981	828447	P07437,Q13885,Q9BUF5,Q3ZCM7,A6NNZ2,Q9BVA1,Q13509,P04350,P68371
Control-1	Cytoplasmic FMR1-interacting protein 2 OS=Homo sapiens GN=CYFIP2 PE=1 SV=2	Q96F07	0.558	0	0	2	2.44e-05	0.018	LGTPQQIAIAR	0.997	55.4	25	48.4			584.346	1166.68	2	-0.1216	1038380	Q7L576
Control-1	Cytoplasmic FMR1-interacting protein 2 OS=Homo sapiens GN=CYFIP2 PE=1 SV=2	Q96F07	0.558	0	0	2	2.44e-05	0.018	YAPLHLVPLIER	0.997	38	25	38			474.282	1419.82	3	-0.4701	709331	Q7L576
Control-1	Ras-related protein Rab-11A OS=Homo sapiens GN=RAB11A PE=1 SV=3	P62491	0.805	0	0	5	6.1e-05	0.222	AITSAYYR	0.976	18.2	25.4	0			472.746	943.477	2	0.6756	1971330	Q15907,P57735
Control-1	Ras-related protein Rab-11A OS=Homo sapiens GN=RAB11A PE=1 SV=3	P62491	0.805	0	0	5	6.1e-05	0.222	AQIWDTAGQER	0.997	42.3	25.5	41.6			637.81	1273.61	2	0.04555	1035360	Q15907
Control-1	Ras-related protein Rab-11A OS=Homo sapiens GN=RAB11A PE=1 SV=3	P62491	0.805	0	0	5	6.1e-05	0.222	NEFNLESK	0.99	27	25.1	14.8			490.738	979.461	2	0.2836	1938780	Q15907
Control-1	Ras-related protein Rab-11A OS=Homo sapiens GN=RAB11A PE=1 SV=3	P62491	0.805	0	0	5	6.1e-05	0.222	STIGVEFATR	0.997	30.7	26.4	26.8			540.789	1079.56	2	2.793	1218120	Q15907
Control-1	Ras-related protein Rab-11A OS=Homo sapiens GN=RAB11A PE=1 SV=3	P62491	0.805	0	0	5	6.1e-05	0.222	VVLIGDSGVGK	0.994	24	25.1	12.5			522.308	1042.6	2	-0.5385	1284430	Q15907
Control-1	Keratin, type I cytoskeletal 19 OS=Homo sapiens GN=KRT19 PE=1 SV=4	P08727	1	22	26	42	0.000513	0.812	AALEDTLAETEAR	0.975	100	26.9	91.2			695.347	1388.68	2	0.5023	8119350
Control-1	Keratin, type I cytoskeletal 19 OS=Homo sapiens GN=KRT19 PE=1 SV=4	P08727	1	22	26	42	0.000513	0.812	AALEDTLAETEAR	0.997	46.5	26.9	46.5			463.9	1388.68	3	0.6923	961082
Control-1	Keratin, type I cytoskeletal 19 OS=Homo sapiens GN=KRT19 PE=1 SV=4	P08727	1	22	26	42	0.000513	0.812	ALEAANGELEVK	0.997	61.4	27.5	49.3			622.331	1242.65	2	1.221	3112930
Control-1	Keratin, type I cytoskeletal 19 OS=Homo sapiens GN=KRT19 PE=1 SV=4	P08727	1	22	26	42	0.000513	0.812	APSIHGGSGGR	0.997	34	25.9	30.4			498.255	994.495	2	0.03823	2033650
Control-1	Keratin, type I cytoskeletal 19 OS=Homo sapiens GN=KRT19 PE=1 SV=4	P08727	1	22	26	42	0.000513	0.812	DAEAWFTSR	0.997	31.7	25	26.8			541.749	1081.48	2	0.01668	1188870
Control-1	Keratin, type I cytoskeletal 19 OS=Homo sapiens GN=KRT19 PE=1 SV=4	P08727	1	22	26	42	0.000513	0.812	DKILGATIENSR	0.997	37.2	27.9	8.21			439.578	1315.71	3	1.004	1270480
Control-1	Keratin, type I cytoskeletal 19 OS=Homo sapiens GN=KRT19 PE=1 SV=4	P08727	1	22	26	42	0.000513	0.812	DYSHYYTTIQDLR	0.997	40.4	25.4	36.5			837.891	1673.77	2	-0.2997	2280240
Control-1	Keratin, type I cytoskeletal 19 OS=Homo sapiens GN=KRT19 PE=1 SV=4	P08727	1	22	26	42	0.000513	0.812	DYSHYYTTIQDLR	0.997	34.8	25.4	24.4			558.93	1673.77	3	0.02511	1963980
Control-1	Keratin, type I cytoskeletal 19 OS=Homo sapiens GN=KRT19 PE=1 SV=4	P08727	1	22	26	42	0.000513	0.812	EVAGHTEQLQmSR	0.997	37.2	25.6	34.6		m11: Oxidation (+15.99)	751.358	1500.7	2	1.067	412020
Control-1	Keratin, type I cytoskeletal 19 OS=Homo sapiens GN=KRT19 PE=1 SV=4	P08727	1	22	26	42	0.000513	0.812	FGAQLAHIQALISGIEAQLGDVR	0.997	28	25	28			803.109	2406.3	3	0.6073	1217120
Control-1	Keratin, type I cytoskeletal 19 OS=Homo sapiens GN=KRT19 PE=1 SV=4	P08727	1	22	26	42	0.000513	0.812	FGPGVAFR	0.99	40.9	26.1	38.6			425.732	849.45	2	-0.2375	976911
Control-1	Keratin, type I cytoskeletal 19 OS=Homo sapiens GN=KRT19 PE=1 SV=4	P08727	1	22	26	42	0.000513	0.812	FVSSSSSGAYGGGYGGVLTASDGLLAGNEK	0.986	69.8	27.6	66.7			1404.67	2807.33	2	3.176	257633
Control-1	Keratin, type I cytoskeletal 19 OS=Homo sapiens GN=KRT19 PE=1 SV=4	P08727	1	22	26	42	0.000513	0.812	FVSSSSSGAYGGGYGGVLTASDGLLAGNEK	0.997	29.1	27.6	29.1			936.784	2807.33	3	2.038	665401
Control-1	Keratin, type I cytoskeletal 19 OS=Homo sapiens GN=KRT19 PE=1 SV=4	P08727	1	22	26	42	0.000513	0.812	FVSSSSSGAYGGGYGGVLTASDGLLAGNEK	0.997	42.6	27.5	42.6			936.783	2807.33	3	0.2749	913738
Control-1	Keratin, type I cytoskeletal 19 OS=Homo sapiens GN=KRT19 PE=1 SV=4	P08727	1	22	26	42	0.000513	0.812	FVSSSSSGAYGGGYGGVLTASDGLLAGNEKLTmQNLNDR	0.986	62.2	26.9	11.7		m33: Oxidation (+15.99)	1303.97	3908.88	3	7.099	125051
Control-1	Keratin, type I cytoskeletal 19 OS=Homo sapiens GN=KRT19 PE=1 SV=4	P08727	1	22	26	42	0.000513	0.812	GQVGGQVSVEVDSAPGTDLAK	0.997	33.3	28.2	33.3			1007.51	2013.01	2	2.382	294743
Control-1	Keratin, type I cytoskeletal 19 OS=Homo sapiens GN=KRT19 PE=1 SV=4	P08727	1	22	26	42	0.000513	0.812	GQVGGQVSVEVDSAPGTDLAK	0.997	60.9	28.2	60.9			1007.51	2013	2	0.6247	744675
Control-1	Keratin, type I cytoskeletal 19 OS=Homo sapiens GN=KRT19 PE=1 SV=4	P08727	1	22	26	42	0.000513	0.812	GQVGGQVSVEVDSAPGTDLAK	0.997	37.9	28.2	37.9			672.008	2013	3	-0.5303	1654300
Control-1	Keratin, type I cytoskeletal 19 OS=Homo sapiens GN=KRT19 PE=1 SV=4	P08727	1	22	26	42	0.000513	0.812	ILGATIENSR	0.997	30.1	27.2	18.9			537.302	1072.59	2	1.228	1726010
Control-1	Keratin, type I cytoskeletal 19 OS=Homo sapiens GN=KRT19 PE=1 SV=4	P08727	1	22	26	42	0.000513	0.812	IVLQIDNAR	0.997	46.4	25	43.4			521.306	1040.6	2	-0.3283	1453830	P05783
Control-1	Keratin, type I cytoskeletal 19 OS=Homo sapiens GN=KRT19 PE=1 SV=4	P08727	1	22	26	42	0.000513	0.812	IVLQIDNAR	0.997	36.5	25	34.1			521.307	1040.6	2	0.4974	2387680	P05783
Control-1	Keratin, type I cytoskeletal 19 OS=Homo sapiens GN=KRT19 PE=1 SV=4	P08727	1	22	26	42	0.000513	0.812	KDAEAWFTSR	0.997	27.2	26.2	22.3			605.797	1209.58	2	1.204	1342850
Control-1	Keratin, type I cytoskeletal 19 OS=Homo sapiens GN=KRT19 PE=1 SV=4	P08727	1	22	26	42	0.000513	0.812	KNHEEEISTLR	0.997	31.5	26.6	15			678.349	1354.68	2	0.1904	297758
Control-1	Keratin, type I cytoskeletal 19 OS=Homo sapiens GN=KRT19 PE=1 SV=4	P08727	1	22	26	42	0.000513	0.812	LEQEIATYR	0.997	50.4	28	39			561.793	1121.57	2	0.08735	1705520	P08779,P13646,Q04695,P02533,P35900
Control-1	Keratin, type I cytoskeletal 19 OS=Homo sapiens GN=KRT19 PE=1 SV=4	P08727	1	22	26	42	0.000513	0.812	LTMQNLNDR	0.997	47.5	26.7	0			552.777	1103.54	2	0.1612	4469380	P13646
Control-1	Keratin, type I cytoskeletal 19 OS=Homo sapiens GN=KRT19 PE=1 SV=4	P08727	1	22	26	42	0.000513	0.812	LTMQNLNDRLASYLDKVR	0.975	20.2	26.4	0			538.29	2149.13	4	-0.4623	799027
Control-1	Keratin, type I cytoskeletal 19 OS=Homo sapiens GN=KRT19 PE=1 SV=4	P08727	1	22	26	42	0.000513	0.812	MSVEADINGLR	0.996	72.2	27.3	59.2			602.803	1203.59	2	-0.1842	1408880	P02533
Control-1	Keratin, type I cytoskeletal 19 OS=Homo sapiens GN=KRT19 PE=1 SV=4	P08727	1	22	26	42	0.000513	0.812	MSVEADINGLRR	0.971	20.1	28.3	11.5			454.239	1359.69	3	1.045	1678980	P02533
Control-1	Keratin, type I cytoskeletal 19 OS=Homo sapiens GN=KRT19 PE=1 SV=4	P08727	1	22	26	42	0.000513	0.812	NHEEEISTLR	0.981	19.9	25.6	19.9			614.302	1226.59	2	-0.06675	2915370
Control-1	Keratin, type I cytoskeletal 19 OS=Homo sapiens GN=KRT19 PE=1 SV=4	P08727	1	22	26	42	0.000513	0.812	QSSATSSFGGLGGGSVR	0.997	52.8	26.8	52.8			777.88	1553.75	2	1.041	1169330
Control-1	Keratin, type I cytoskeletal 19 OS=Homo sapiens GN=KRT19 PE=1 SV=4	P08727	1	22	26	42	0.000513	0.812	SLLEGQEDHYNNLSASK	0.997	48	26.8	48			952.954	1903.89	2	0.7339	1029080
Control-1	Keratin, type I cytoskeletal 19 OS=Homo sapiens GN=KRT19 PE=1 SV=4	P08727	1	22	26	42	0.000513	0.812	SQYEVMAEQNR	0.997	42.2	25	30.8			677.806	1353.6	2	-1.109	656578
Control-1	Keratin, type I cytoskeletal 19 OS=Homo sapiens GN=KRT19 PE=1 SV=4	P08727	1	22	26	42	0.000513	0.812	SQYEVMAEQNRK	0.997	36.5	26.2	36.5			741.855	1481.7	2	1.941	650956
Control-1	Keratin, type I cytoskeletal 19 OS=Homo sapiens GN=KRT19 PE=1 SV=4	P08727	1	22	26	42	0.000513	0.812	SRLEQEIATYR	0.978	20	27.7	3.29			455.909	1364.71	3	0.6825	8288600
Control-1	Keratin, type I cytoskeletal 19 OS=Homo sapiens GN=KRT19 PE=1 SV=4	P08727	1	22	26	42	0.000513	0.812	TDLEMQIEGLK	0.997	54.2	28	43.8			638.827	1275.64	2	0.1238	982752	P08779
Control-1	Keratin, type I cytoskeletal 19 OS=Homo sapiens GN=KRT19 PE=1 SV=4	P08727	1	22	26	42	0.000513	0.812	TDLEMQIEGLKEELAYLKK	0.997	33.4	27.3	28.6			563.552	2250.18	4	-1.668	1182400
Control-1	Keratin, type I cytoskeletal 19 OS=Homo sapiens GN=KRT19 PE=1 SV=4	P08727	1	22	26	42	0.000513	0.812	TKFETEQALR	0.997	51	28.1	35.7			408.219	1221.63	3	-0.8571	2398330	Q04695
Control-1	Keratin, type I cytoskeletal 19 OS=Homo sapiens GN=KRT19 PE=1 SV=4	P08727	1	22	26	42	0.000513	0.812	TKFETEQALR	0.997	51.4	27.6	31.1			611.826	1221.64	2	1.7	1451480	Q04695
Control-1	Keratin, type I cytoskeletal 19 OS=Homo sapiens GN=KRT19 PE=1 SV=4	P08727	1	22	26	42	0.000513	0.812	TLQGLEIELQSQLSMK	0.997	55.5	27.3	44.9			606.661	1816.96	3	0.7492	674850	P13646
Control-1	Keratin, type I cytoskeletal 19 OS=Homo sapiens GN=KRT19 PE=1 SV=4	P08727	1	22	26	42	0.000513	0.812	TLQGLEIELQSQLSmK	0.997	38.4	27.6	3.79		m15: Oxidation (+15.99)	611.993	1832.96	3	1.187	654770	P13646
Control-1	Keratin, type I cytoskeletal 19 OS=Homo sapiens GN=KRT19 PE=1 SV=4	P08727	1	22	26	42	0.000513	0.812	TLQGLEIELQSQLSMK	0.997	40	27.6	37.5			909.486	1816.96	2	-2.267	781486	P13646
Control-1	Keratin, type I cytoskeletal 19 OS=Homo sapiens GN=KRT19 PE=1 SV=4	P08727	1	22	26	42	0.000513	0.812	VLDELTLAR	0.997	36.8	25	28.4			515.301	1028.59	2	0.7168	1053640	P08779,Q04695,P02533
Control-1	Eukaryotic translation initiation factor 5A-2 OS=Homo sapiens GN=EIF5A2 PE=1 SV=3	Q9GZV4	0.425	0	0	2	2.44e-05	0.131	IVEMSTSK	0.99	26.9	26.1	9.95			447.732	893.45	2	-3.088	855216	P63241
Control-1	Eukaryotic translation initiation factor 5A-2 OS=Homo sapiens GN=EIF5A2 PE=1 SV=3	Q9GZV4	0.425	0	0	2	2.44e-05	0.131	VHLVGIDIFTGK	0.997	37.3	25	37.3			433.588	1297.74	3	1.049	415293	Q6IS14,P63241
Control-1	Elongation factor 1-gamma OS=Homo sapiens GN=EEF1G PE=1 SV=3	P26641	1	5	6	6	7.32e-05	0.121	ALIAAQYSGAQVR	0.997	57.1	27.5	50.5			674.373	1346.73	2	1.186	1014890
Control-1	Elongation factor 1-gamma OS=Homo sapiens GN=EEF1G PE=1 SV=3	P26641	1	5	6	6	7.32e-05	0.121	DPFAHLPK	0.975	17.8	25.1	8.81			462.751	923.487	2	0.2575	811054
Control-1	Elongation factor 1-gamma OS=Homo sapiens GN=EEF1G PE=1 SV=3	P26641	1	5	6	6	7.32e-05	0.121	ILGLLDAYLK	0.969	17	25	10.2			559.845	1117.68	2	0.1592	274258
Control-1	Elongation factor 1-gamma OS=Homo sapiens GN=EEF1G PE=1 SV=3	P26641	1	5	6	6	7.32e-05	0.121	KFAETQPK	0.99	38.3	27.3	16.7			474.761	947.507	2	-0.7611	411549
Control-1	Elongation factor 1-gamma OS=Homo sapiens GN=EEF1G PE=1 SV=3	P26641	1	5	6	6	7.32e-05	0.121	KLDPGSEETQTLVR	0.997	63.9	28	52.3			786.917	1571.82	2	1.779	513339
Control-1	Elongation factor 1-gamma OS=Homo sapiens GN=EEF1G PE=1 SV=3	P26641	1	5	6	6	7.32e-05	0.121	KLDPGSEETQTLVR	0.997	46.6	28.2	44.1			524.946	1571.82	3	0.4654	2028650
Control-1	Valine--tRNA ligase OS=Homo sapiens GN=VARS PE=1 SV=4	P26640	1	2	2	2	2.44e-05	0.0214	IETMLGDVAVAVHPK	0.997	42.8	26.8	42.8			527.288	1578.84	3	-0.5241	812880
Control-1	Valine--tRNA ligase OS=Homo sapiens GN=VARS PE=1 SV=4	P26640	1	2	2	2	2.44e-05	0.0214	VPLEVQEADEAK	0.992	25.4	27.4	23.1			664.342	1326.67	2	2.002	793161
Control-1	Ras-related C3 botulinum toxin substrate 1 OS=Homo sapiens GN=RAC1 PE=1 SV=1	P63000	1	2	2	5	6.1e-05	0.286	AVLcPPPVK	0.997	32.1	25.1	32.1	c4: Carbamidomethyl (+57.02)		490.784	979.554	2	1.012	1173620	P60763
Control-1	Ras-related C3 botulinum toxin substrate 1 OS=Homo sapiens GN=RAC1 PE=1 SV=1	P63000	1	2	2	5	6.1e-05	0.286	HHcPNTPIILVGTK	0.966	18.6	27.5	16.9	c3: Carbamidomethyl (+57.02)		529.62	1585.84	3	-0.3297	1980800
Control-1	Ras-related C3 botulinum toxin substrate 1 OS=Homo sapiens GN=RAC1 PE=1 SV=1	P63000	1	2	2	5	6.1e-05	0.286	LTPITYPQGLAMAK	0.996	25.2	26.9	23.5			752.416	1502.82	2	0.6637	1088610
Control-1	Ras-related C3 botulinum toxin substrate 1 OS=Homo sapiens GN=RAC1 PE=1 SV=1	P63000	1	2	2	5	6.1e-05	0.286	TVFDEAIR	0.99	31	26.7	31			475.751	949.487	2	0.06108	1273900	P15153,P60763
Control-1	Ras-related C3 botulinum toxin substrate 1 OS=Homo sapiens GN=RAC1 PE=1 SV=1	P63000	1	2	2	5	6.1e-05	0.286	YLEcSALTQR	0.997	45.5	26.2	37.7	c4: Carbamidomethyl (+57.02)		620.803	1239.59	2	0.1393	1462950	P15153,P60763
Control-1	Na(+)/H(+) exchange regulatory cofactor NHE-RF1 OS=Homo sapiens GN=SLC9A3R1 PE=1 SV=4	O14745	1	2	2	2	2.44e-05	0.067	LLVVDPETDEQLQK	0.996	25.3	27.3	17.7			813.933	1625.85	2	0.3553	652005
Control-1	Na(+)/H(+) exchange regulatory cofactor NHE-RF1 OS=Homo sapiens GN=SLC9A3R1 PE=1 SV=4	O14745	1	2	2	2	2.44e-05	0.067	LVEPGSPAEK	0.989	23.3	25.5	15.9			513.777	1025.54	2	-0.6643	750608
Control-1	40S ribosomal protein S17 OS=Homo sapiens GN=RPS17 PE=1 SV=2	P08708	1	3	4	4	4.88e-05	0.163	IAGYVTHLMK	0.997	35.4	27.7	28.6			566.812	1131.61	2	-0.7434	931084
Control-1	40S ribosomal protein S17 OS=Homo sapiens GN=RPS17 PE=1 SV=2	P08708	1	3	4	4	4.88e-05	0.163	VcEEIAIIPSK	0.988	22.3	27.5	14.7	c2: Carbamidomethyl (+57.02)		629.84	1257.66	2	0.3915	1509460
Control-1	40S ribosomal protein S17 OS=Homo sapiens GN=RPS17 PE=1 SV=2	P08708	1	3	4	4	4.88e-05	0.163	VcEEIAIIPSKK	0.997	34.3	26.6	26.7	c2: Carbamidomethyl (+57.02)		693.888	1385.76	2	1.394	640638
Control-1	40S ribosomal protein S17 OS=Homo sapiens GN=RPS17 PE=1 SV=2	P08708	1	3	4	4	4.88e-05	0.163	VcEEIAIIPSKK	0.997	46.2	26.4	34.1	c2: Carbamidomethyl (+57.02)		462.927	1385.76	3	0.09862	1206480
Control-1	Ankyrin-2 OS=Homo sapiens GN=ANK2 PE=1 SV=4	Q01484	0.952	0	0	2	2.44e-05	0.0048	DFPQYFAVVSR	0.997	39.1	26.3	38.2			664.835	1327.66	2	-0.438	679567
Control-1	Ankyrin-2 OS=Homo sapiens GN=ANK2 PE=1 SV=4	Q01484	0.952	0	0	2	2.44e-05	0.0048	VALLLLEK	0.99	25.8	25	18.9			449.802	897.59	2	0.3317	337969	Q9Y4W6
Control-1	Heterogeneous nuclear ribonucleoprotein M OS=Homo sapiens GN=HNRNPM PE=1 SV=3	P52272	1	8	8	8	9.77e-05	0.138	AFITNIPFDVK	0.997	36.9	26.7	33.3			632.85	1263.69	2	-0.3653	626433
Control-1	Heterogeneous nuclear ribonucleoprotein M OS=Homo sapiens GN=HNRNPM PE=1 SV=3	P52272	1	8	8	8	9.77e-05	0.138	FESPEVAER	0.97	17.6	25.6	12.5			532.257	1062.5	2	0.7692	1140800
Control-1	Heterogeneous nuclear ribonucleoprotein M OS=Homo sapiens GN=HNRNPM PE=1 SV=3	P52272	1	8	8	8	9.77e-05	0.138	GNFGGSFAGSFGGAGGHAPGVAR	0.992	82.6	26.6	81.9			678.99	2033.95	3	0.4433	2268570
Control-1	Heterogeneous nuclear ribonucleoprotein M OS=Homo sapiens GN=HNRNPM PE=1 SV=3	P52272	1	8	8	8	9.77e-05	0.138	MGANSLER	0.99	46.8	25.2	45			439.213	876.412	2	-0.3897	1133410
Control-1	Heterogeneous nuclear ribonucleoprotein M OS=Homo sapiens GN=HNRNPM PE=1 SV=3	P52272	1	8	8	8	9.77e-05	0.138	MGPLGLDHMASSIER	0.997	30.4	26.5	30.4			538.597	1612.77	3	-1.337	1077390
Control-1	Heterogeneous nuclear ribonucleoprotein M OS=Homo sapiens GN=HNRNPM PE=1 SV=3	P52272	1	8	8	8	9.77e-05	0.138	NLPFDFTWK	0.996	25.8	26.6	24.8			584.295	1166.58	2	-0.8581	378077
Control-1	Heterogeneous nuclear ribonucleoprotein M OS=Homo sapiens GN=HNRNPM PE=1 SV=3	P52272	1	8	8	8	9.77e-05	0.138	QGGGGGGGSVPGIER	0.997	63.6	26.6	60.1			642.819	1283.62	2	0.4655	597631
Control-1	Heterogeneous nuclear ribonucleoprotein M OS=Homo sapiens GN=HNRNPM PE=1 SV=3	P52272	1	8	8	8	9.77e-05	0.138	VKEDPDGEHAR	0.997	43.9	25.2	38			626.8	1251.58	2	-0.00155	54190.2
Control-1	6-phosphogluconolactonase OS=Homo sapiens GN=PGLS PE=1 SV=2	O95336	1	4	4	4	4.88e-05	0.244	ELPAAVAPAGPASLAR	0.997	43.9	26.2	40			745.921	1489.83	2	0.7634	1106580
Control-1	6-phosphogluconolactonase OS=Homo sapiens GN=PGLS PE=1 SV=2	O95336	1	4	4	4	4.88e-05	0.244	ILEDQEENPLPAALVQPHTGK	0.986	23.7	27.4	21.1			767.07	2298.19	3	1.441	911521
Control-1	6-phosphogluconolactonase OS=Homo sapiens GN=PGLS PE=1 SV=2	O95336	1	4	4	4	4.88e-05	0.244	LVPFDHAESTYGLYR	0.989	22.7	27.9	22.7			589.962	1766.86	3	0.7026	842127
Control-1	6-phosphogluconolactonase OS=Homo sapiens GN=PGLS PE=1 SV=2	O95336	1	4	4	4	4.88e-05	0.244	TVIFVATGEGK	0.968	17.8	26.9	17.8			561.314	1120.61	2	0.4797	926114
Control-1	Fatty acid-binding protein, epidermal OS=Homo sapiens GN=FABP5 PE=1 SV=3	Q01469	1	4	4	4	4.88e-05	0.244	ELGVGIALR	0.997	34.3	25	31.4			464.285	926.555	2	-0.2393	1326160
Control-1	Fatty acid-binding protein, epidermal OS=Homo sapiens GN=FABP5 PE=1 SV=3	Q01469	1	4	4	4	4.88e-05	0.244	FEETTADGR	0.997	42.8	25	29.5			513.23	1024.45	2	-0.2359	573139
Control-1	Fatty acid-binding protein, epidermal OS=Homo sapiens GN=FABP5 PE=1 SV=3	Q01469	1	4	4	4	4.88e-05	0.244	FEETTADGRK	0.992	23.3	26.1	18.4			577.278	1152.54	2	0.7092	298638
Control-1	Fatty acid-binding protein, epidermal OS=Homo sapiens GN=FABP5 PE=1 SV=3	Q01469	1	4	4	4	4.88e-05	0.244	LVVEcVMNNVTcTR	0.979	71.3	26.5	71.3	c5: Carbamidomethyl (+57.02), c12: Carbamidomethyl (+57.02)		847.903	1693.79	2	-2.438	807475
Control-1	Heterogeneous nuclear ribonucleoprotein Q OS=Homo sapiens GN=SYNCRIP PE=1 SV=2	O60506	1	1	1	4	4.88e-05	0.0594	AGPIWDLR	0.99	41.3	25	29.3			464.256	926.497	2	-0.2393	631427	O43390
Control-1	Heterogeneous nuclear ribonucleoprotein Q OS=Homo sapiens GN=SYNCRIP PE=1 SV=2	O60506	1	1	1	4	4.88e-05	0.0594	DYAFIHFDER	0.997	26.6	25	24.4			438.204	1311.59	3	0.2682	284358
Control-1	Heterogeneous nuclear ribonucleoprotein Q OS=Homo sapiens GN=SYNCRIP PE=1 SV=2	O60506	1	1	1	4	4.88e-05	0.0594	GFcFLEYEDHK	0.986	22.3	25	22.3	c3: Carbamidomethyl (+57.02)		482.211	1443.61	3	-0.4591	1041000	O43390
Control-1	Heterogeneous nuclear ribonucleoprotein Q OS=Homo sapiens GN=SYNCRIP PE=1 SV=2	O60506	1	1	1	4	4.88e-05	0.0594	LFVGSIPK	0.99	29	25.8	12.2			430.766	859.517	2	0.09071	1144990	O43390
Control-1	40S ribosomal protein S2 OS=Homo sapiens GN=RPS2 PE=1 SV=2	P15880	1	5	6	6	7.32e-05	0.222	AFVAIGDYNGHVGLGVK	0.997	47	27.8	46.9			572.974	1715.9	3	0.7118	1036740
Control-1	40S ribosomal protein S2 OS=Homo sapiens GN=RPS2 PE=1 SV=2	P15880	1	5	6	6	7.32e-05	0.222	GTGIVSAPVPK	0.997	30.9	25	28.3			513.304	1024.59	2	1.09	1204930
Control-1	40S ribosomal protein S2 OS=Homo sapiens GN=RPS2 PE=1 SV=2	P15880	1	5	6	6	7.32e-05	0.222	IGKPHTVPcK	0.997	31.4	27.3	27.5	c9: Carbamidomethyl (+57.02)		379.546	1135.62	3	-0.5835	1154700
Control-1	40S ribosomal protein S2 OS=Homo sapiens GN=RPS2 PE=1 SV=2	P15880	1	5	6	6	7.32e-05	0.222	LLMMAGIDDcYTSAR	0.997	48.6	25	48.6	c10: Carbamidomethyl (+57.02)		858.892	1715.77	2	0.322	664062
Control-1	40S ribosomal protein S2 OS=Homo sapiens GN=RPS2 PE=1 SV=2	P15880	1	5	6	6	7.32e-05	0.222	SPYQEFTDHLVK	0.988	23.5	27.5	16.5			732.363	1462.71	2	0.9688	867914
Control-1	40S ribosomal protein S2 OS=Homo sapiens GN=RPS2 PE=1 SV=2	P15880	1	5	6	6	7.32e-05	0.222	SPYQEFTDHLVK	0.997	35	27.5	34.7			488.578	1462.71	3	1.545	1128170
Control-1	Histone H1.2 OS=Homo sapiens GN=HIST1H1C PE=1 SV=2	P16403	1	1	1	7	8.55e-05	0.235	ALAAAGYDVEK	0.997	58.1	28.3	48.5			554.288	1106.56	2	0.3413	5107550	P22492,P10412,Q02539,P16402
Control-1	Histone H1.2 OS=Homo sapiens GN=HIST1H1C PE=1 SV=2	P16403	1	1	1	7	8.55e-05	0.235	ASGPPVSELITK	0.99	22.6	25.9	22.6			599.838	1197.66	2	0.4656	1241600	P10412,P16402
Control-1	Histone H1.2 OS=Homo sapiens GN=HIST1H1C PE=1 SV=2	P16403	1	1	1	7	8.55e-05	0.235	KASGPPVSELITK	0.997	57.3	25	43			663.886	1325.76	2	0.9482	1226850	P10412,P16402
Control-1	Histone H1.2 OS=Homo sapiens GN=HIST1H1C PE=1 SV=2	P16403	1	1	1	7	8.55e-05	0.235	KASGPPVSELITK	0.997	29.5	25	29.5			442.926	1325.76	3	1.125	1677060	P10412,P16402
Control-1	Histone H1.2 OS=Homo sapiens GN=HIST1H1C PE=1 SV=2	P16403	1	1	1	7	8.55e-05	0.235	SETAPAAPAAAPPAEK	0.997	27.4	28.2	1.2			739.879	1477.74	2	2.027	880463
Control-1	Histone H1.2 OS=Homo sapiens GN=HIST1H1C PE=1 SV=2	P16403	1	1	1	7	8.55e-05	0.235	SGVSLAALK	0.997	38.7	26	27.2			423.258	844.502	2	0.06867	3236160	P10412,P16402
Control-1	Histone H1.2 OS=Homo sapiens GN=HIST1H1C PE=1 SV=2	P16403	1	1	1	7	8.55e-05	0.235	SGVSLAALKK	0.997	50.7	25	39.6			487.306	972.598	2	1.354	1617120	P10412,P16402
Control-1	Histone H1.3 OS=Homo sapiens GN=HIST1H1D PE=1 SV=2	P16402	0.917	0	0	6	7.32e-05	0.154	ALAAAGYDVEK	0.997	58.1	28.3	48.5			554.288	1106.56	2	0.3413	5107550	P22492,P10412,Q02539,P16403
Control-1	Histone H1.3 OS=Homo sapiens GN=HIST1H1D PE=1 SV=2	P16402	0.917	0	0	6	7.32e-05	0.154	ASGPPVSELITK	0.99	22.6	25.9	22.6			599.838	1197.66	2	0.4656	1241600	P10412,P16403
Control-1	Histone H1.3 OS=Homo sapiens GN=HIST1H1D PE=1 SV=2	P16402	0.917	0	0	6	7.32e-05	0.154	KASGPPVSELITK	0.997	57.3	25	43			663.886	1325.76	2	0.9482	1226850	P10412,P16403
Control-1	Histone H1.3 OS=Homo sapiens GN=HIST1H1D PE=1 SV=2	P16402	0.917	0	0	6	7.32e-05	0.154	KASGPPVSELITK	0.997	29.5	25	29.5			442.926	1325.76	3	1.125	1677060	P10412,P16403
Control-1	Histone H1.3 OS=Homo sapiens GN=HIST1H1D PE=1 SV=2	P16402	0.917	0	0	6	7.32e-05	0.154	SGVSLAALK	0.997	38.7	26	27.2			423.258	844.502	2	0.06867	3236160	P10412,P16403
Control-1	Histone H1.3 OS=Homo sapiens GN=HIST1H1D PE=1 SV=2	P16402	0.917	0	0	6	7.32e-05	0.154	SGVSLAALKK	0.997	50.7	25	39.6			487.306	972.598	2	1.354	1617120	P10412,P16403
Control-1	60S ribosomal protein L7a OS=Homo sapiens GN=RPL7A PE=1 SV=2	P62424	1	7	7	7	8.55e-05	0.233	AGVNTVTTLVENK	0.997	57.2	27.3	52			673.371	1344.73	2	1.158	863616
Control-1	60S ribosomal protein L7a OS=Homo sapiens GN=RPL7A PE=1 SV=2	P62424	1	7	7	7	8.55e-05	0.233	HWGGNVLGPK	0.972	18.6	27.8	18			532.786	1063.56	2	0.2424	1157100
Control-1	60S ribosomal protein L7a OS=Homo sapiens GN=RPL7A PE=1 SV=2	P62424	1	7	7	7	8.55e-05	0.233	KVAPAPAVVK	0.978	19	25	18.1			490.319	978.622	2	-0.2061	986935
Control-1	60S ribosomal protein L7a OS=Homo sapiens GN=RPL7A PE=1 SV=2	P62424	1	7	7	7	8.55e-05	0.233	KVVNPLFEK	0.997	49.6	25	29.6			537.321	1072.63	2	-0.3557	1189960
Control-1	60S ribosomal protein L7a OS=Homo sapiens GN=RPL7A PE=1 SV=2	P62424	1	7	7	7	8.55e-05	0.233	MGVPYcIIK	0.997	34.5	27.2	17.1	c6: Carbamidomethyl (+57.02)		540.783	1079.55	2	0.2894	767767
Control-1	60S ribosomal protein L7a OS=Homo sapiens GN=RPL7A PE=1 SV=2	P62424	1	7	7	7	8.55e-05	0.233	NFGIGQDIQPK	0.997	33.7	27.2	19.6			608.821	1215.63	2	1.133	1310500
Control-1	60S ribosomal protein L7a OS=Homo sapiens GN=RPL7A PE=1 SV=2	P62424	1	7	7	7	8.55e-05	0.233	VAPAPAVVK	0.997	27.5	25	27.5			426.271	850.527	2	-0.7069	1283450
Control-1	N(G),N(G)-dimethylarginine dimethylaminohydrolase 1 OS=Homo sapiens GN=DDAH1 PE=1 SV=3	O94760	1	4	4	5	6.1e-05	0.137	EFFVGLSK	0.966	18.4	25	15.6			463.753	925.491	2	-0.4338	873729	O95865
Control-1	N(G),N(G)-dimethylarginine dimethylaminohydrolase 1 OS=Homo sapiens GN=DDAH1 PE=1 SV=3	O94760	1	4	4	5	6.1e-05	0.137	GAEILADTFK	0.997	33.7	26.7	27.4			532.785	1063.56	2	0.09211	1257310
Control-1	N(G),N(G)-dimethylarginine dimethylaminohydrolase 1 OS=Homo sapiens GN=DDAH1 PE=1 SV=3	O94760	1	4	4	5	6.1e-05	0.137	GEEVDVAR	0.99	28.6	25	23.4			437.717	873.42	2	0.9355	703778
Control-1	N(G),N(G)-dimethylarginine dimethylaminohydrolase 1 OS=Homo sapiens GN=DDAH1 PE=1 SV=3	O94760	1	4	4	5	6.1e-05	0.137	SAKGEEVDVAR	0.985	22.4	27.2	15			580.8	1159.58	2	1.136	301346
Control-1	N(G),N(G)-dimethylarginine dimethylaminohydrolase 1 OS=Homo sapiens GN=DDAH1 PE=1 SV=3	O94760	1	4	4	5	6.1e-05	0.137	TPEEYPESAK	0.997	42.8	25	34.5			575.767	1149.52	2	-0.1581	615149
Control-1	Mitochondrial antiviral-signaling protein OS=Homo sapiens GN=MAVS PE=1 SV=2	Q7Z434	1	2	2	2	2.44e-05	0.0833	GPVSPSVSFQPLAR	0.997	54.1	26.6	54.1			721.395	1440.78	2	1.774	890473
Control-1	Mitochondrial antiviral-signaling protein OS=Homo sapiens GN=MAVS PE=1 SV=2	Q7Z434	1	2	2	2	2.44e-05	0.0833	LPGPTGSVVSTGTSFSSSSPGLASAGAAEGK	0.986	77.1	28.3	72.7			922.128	2763.36	3	2.388	702818
Control-1	Eukaryotic translation initiation factor 4B OS=Homo sapiens GN=EIF4B PE=1 SV=2	P23588	1	3	3	3	3.66e-05	0.0606	AASIFGGAKPVDTAAR	0.99	23.5	27.4	23.5			511.279	1530.82	3	0.1515	2175550
Control-1	Eukaryotic translation initiation factor 4B OS=Homo sapiens GN=EIF4B PE=1 SV=2	P23588	1	3	3	3	3.66e-05	0.0606	GLNISAVR	0.99	23.5	25	3.94			415.248	828.481	2	-0.6533	850325
Control-1	Eukaryotic translation initiation factor 4B OS=Homo sapiens GN=EIF4B PE=1 SV=2	P23588	1	3	3	3	3.66e-05	0.0606	VAPAQPSEEGPGR	0.997	42	27.3	42			647.823	1293.63	2	0.1684	460986
Control-1	Dynein light chain roadblock-type 1 OS=Homo sapiens GN=DYNLRB1 PE=1 SV=3	Q9NP97	1	1	1	2	2.44e-05	0.292	DIDPQNDLTFLR	0.997	53.9	27.5	53.9			723.866	1445.72	2	0.8005	849567
Control-1	Dynein light chain roadblock-type 1 OS=Homo sapiens GN=DYNLRB1 PE=1 SV=3	Q9NP97	1	1	1	2	2.44e-05	0.292	GVQGIIVVNTEGIPIK	0.997	35	25	35			818.986	1635.96	2	0.9762	1155140
Control-1	Histone H2B type 1-B OS=Homo sapiens GN=HIST1H2BB PE=1 SV=2	P33778	0.293	0	0	19	0.000232	0.357	AmGIMNSFVNDIFER	0.987	60	25.4	13.7		m2: Oxidation (+15.99)	880.407	1758.8	2	-4.021	722042	P57053,P23527,Q99880,P58876,Q8N257,Q99879
Control-1	Histone H2B type 1-B OS=Homo sapiens GN=HIST1H2BB PE=1 SV=2	P33778	0.293	0	0	19	0.000232	0.357	AMGImNSFVNDIFER	0.987	79.8	25.4	19		m5: Oxidation (+15.99)	880.412	1758.81	2	1.729	845659	P57053,P23527,Q99880,P58876,Q8N257,Q99879
Control-1	Histone H2B type 1-B OS=Homo sapiens GN=HIST1H2BB PE=1 SV=2	P33778	0.293	0	0	19	0.000232	0.357	AmGIMNSFVNDIFER	0.997	44.2	25.7	15.8		m2: Oxidation (+15.99)	880.413	1758.81	2	2.707	1566340	P57053,P23527,Q99880,P58876,Q8N257,Q99879
Control-1	Histone H2B type 1-B OS=Homo sapiens GN=HIST1H2BB PE=1 SV=2	P33778	0.293	0	0	19	0.000232	0.357	AMGImNSFVNDIFER	0.997	59.9	25.4	10.8		m5: Oxidation (+15.99)	880.412	1758.81	2	1.456	659226	P57053,P23527,Q99880,P58876,Q8N257,Q99879
Control-1	Histone H2B type 1-B OS=Homo sapiens GN=HIST1H2BB PE=1 SV=2	P33778	0.293	0	0	19	0.000232	0.357	AmGIMNSFVNDIFER	0.997	63.9	25.7	13.6		m2: Oxidation (+15.99)	880.412	1758.81	2	1.172	1572440	P57053,P23527,Q99880,P58876,Q8N257,Q99879
Control-1	Histone H2B type 1-B OS=Homo sapiens GN=HIST1H2BB PE=1 SV=2	P33778	0.293	0	0	19	0.000232	0.357	AmGImNSFVNDIFER	0.997	43	25.5	43		m2: Oxidation (+15.99), m5: Oxidation (+15.99)	888.409	1774.8	2	1.142	656865	P57053,P23527,Q99880,P58876,Q8N257,Q99879
Control-1	Histone H2B type 1-B OS=Homo sapiens GN=HIST1H2BB PE=1 SV=2	P33778	0.293	0	0	19	0.000232	0.357	AmGIMNSFVNDIFER	0.997	30.1	25.5	5.25		m2: Oxidation (+15.99)	587.276	1758.81	3	-0.1551	458625	P57053,P23527,Q99880,P58876,Q8N257,Q99879
Control-1	Histone H2B type 1-B OS=Homo sapiens GN=HIST1H2BB PE=1 SV=2	P33778	0.293	0	0	19	0.000232	0.357	AMGImNSFVNDIFER	0.997	36.6	25.7	0		m5: Oxidation (+15.99)	880.41	1758.8	2	-1.18	776243	P57053,P23527,Q99880,P58876,Q8N257,Q99879
Control-1	Histone H2B type 1-B OS=Homo sapiens GN=HIST1H2BB PE=1 SV=2	P33778	0.293	0	0	19	0.000232	0.357	AMGImNSFVNDIFER	0.997	39.2	25.7	7.54		m5: Oxidation (+15.99)	880.41	1758.81	2	-0.9075	931662	P57053,P23527,Q99880,P58876,Q8N257,Q99879
Control-1	Histone H2B type 1-B OS=Homo sapiens GN=HIST1H2BB PE=1 SV=2	P33778	0.293	0	0	19	0.000232	0.357	KESYSIYVYK	0.989	23.2	27.4	17.8			427.224	1278.65	3	0.1188	1296490	Q6DN03,P23527,Q6DRA6,Q8N257
Control-1	Histone H2B type 1-B OS=Homo sapiens GN=HIST1H2BB PE=1 SV=2	P33778	0.293	0	0	19	0.000232	0.357	KESYSIYVYK	0.997	49.4	27.4	39.8			640.332	1278.65	2	0.3423	4692860	Q6DN03,P23527,Q6DRA6,Q8N257
Control-1	Histone H2B type 1-B OS=Homo sapiens GN=HIST1H2BB PE=1 SV=2	P33778	0.293	0	0	19	0.000232	0.357	LLLPGELAK	0.99	22.6	25	14			477.306	952.597	2	0.9837	717438	P57053,P23527,Q99880,P58876,Q8N257,Q96A08,Q99879
Control-1	Histone H2B type 1-B OS=Homo sapiens GN=HIST1H2BB PE=1 SV=2	P33778	0.293	0	0	19	0.000232	0.357	LLLPGELAK	0.997	33.5	25	9.61			477.305	952.594	2	-1.596	1157450	P57053,P23527,Q99880,P58876,Q8N257,Q96A08,Q99879
Control-1	Histone H2B type 1-B OS=Homo sapiens GN=HIST1H2BB PE=1 SV=2	P33778	0.293	0	0	19	0.000232	0.357	LLLPGELAK	0.997	31.4	25	9.29			477.305	952.595	2	-0.9458	743424	P57053,P23527,Q99880,P58876,Q8N257,Q96A08,Q99879
Control-1	Histone H2B type 1-B OS=Homo sapiens GN=HIST1H2BB PE=1 SV=2	P33778	0.293	0	0	19	0.000232	0.357	LLLPGELAK	0.997	27.4	25	3.47			477.305	952.596	2	-0.3796	723221	P57053,P23527,Q99880,P58876,Q8N257,Q96A08,Q99879
Control-1	Histone H2B type 1-B OS=Homo sapiens GN=HIST1H2BB PE=1 SV=2	P33778	0.293	0	0	19	0.000232	0.357	LLLPGELAK	0.997	35.2	25	12.8			477.305	952.596	2	0.08186	608312	P57053,P23527,Q99880,P58876,Q8N257,Q96A08,Q99879
Control-1	Histone H2B type 1-B OS=Homo sapiens GN=HIST1H2BB PE=1 SV=2	P33778	0.293	0	0	19	0.000232	0.357	LLLPGELAK	0.997	36.3	25	11.5			477.305	952.595	2	-0.6312	2137310	P57053,P23527,Q99880,P58876,Q8N257,Q96A08,Q99879
Control-1	Histone H2B type 1-B OS=Homo sapiens GN=HIST1H2BB PE=1 SV=2	P33778	0.293	0	0	19	0.000232	0.357	LLLPGELAK	0.997	36.8	25	11.9			477.305	952.595	2	-0.5683	8809930	P57053,P23527,Q99880,P58876,Q8N257,Q96A08,Q99879
Control-1	Histone H2B type 1-B OS=Homo sapiens GN=HIST1H2BB PE=1 SV=2	P33778	0.293	0	0	19	0.000232	0.357	QVHPDTGISSK	0.992	53.4	27.3	47.2			584.8	1167.59	2	-2.381	770692	P57053,P23527,Q99880,P58876,Q8N257,Q96A08,Q99879
Control-1	6-phosphogluconate dehydrogenase, decarboxylating OS=Homo sapiens GN=PGD PE=1 SV=3	P52209	1	3	3	3	3.66e-05	0.0828	AGQAVDDFIEK	0.997	62.5	27.4	50.7			596.796	1191.58	2	-0.1023	1379890
Control-1	6-phosphogluconate dehydrogenase, decarboxylating OS=Homo sapiens GN=PGD PE=1 SV=3	P52209	1	3	3	3	3.66e-05	0.0828	LVPLLDTGDIIIDGGNSEYR	0.974	19	28.1	19			720.712	2159.11	3	0.6259	721283
Control-1	6-phosphogluconate dehydrogenase, decarboxylating OS=Homo sapiens GN=PGD PE=1 SV=3	P52209	1	3	3	3	3.66e-05	0.0828	TIFQGIAAK	0.984	20.4	25	12.3			474.779	947.544	2	-0.002047	1328080
Control-1	Myosin-14 OS=Homo sapiens GN=MYH14 PE=1 SV=2	Q7Z406	1	31	33	52	0.000635	0.265	AEAELcAEAEETR	0.997	36.4	25	36.4	c6: Carbamidomethyl (+57.02)		739.826	1477.64	2	0.9419	798057
Control-1	Myosin-14 OS=Homo sapiens GN=MYH14 PE=1 SV=2	Q7Z406	1	31	33	52	0.000635	0.265	AEDMAELTcLNEASVLHNLR	0.997	35.9	27.6	35.9	c9: Carbamidomethyl (+57.02)		762.702	2285.08	3	2.837	1197250
Control-1	Myosin-14 OS=Homo sapiens GN=MYH14 PE=1 SV=2	Q7Z406	1	31	33	52	0.000635	0.265	AELEALLSSK	0.997	42.8	26.4	35.8			530.798	1059.58	2	0.2245	955640
Control-1	Myosin-14 OS=Homo sapiens GN=MYH14 PE=1 SV=2	Q7Z406	1	31	33	52	0.000635	0.265	AELEALLSSKDDVGK	0.997	28	28.3	25.1			525.614	1573.82	3	-0.4368	951450
Control-1	Myosin-14 OS=Homo sapiens GN=MYH14 PE=1 SV=2	Q7Z406	1	31	33	52	0.000635	0.265	AMEAEAAGLR	0.997	47.2	25.6	39.3			509.753	1017.49	2	0.1159	859422
Control-1	Myosin-14 OS=Homo sapiens GN=MYH14 PE=1 SV=2	Q7Z406	1	31	33	52	0.000635	0.265	AQAELENVSGALNEAESK	0.997	43.5	27.3	43.5			930.453	1858.89	2	0.1818	491043
Control-1	Myosin-14 OS=Homo sapiens GN=MYH14 PE=1 SV=2	Q7Z406	1	31	33	52	0.000635	0.265	AQMASAGQGKEEAVK	0.997	49.9	27.6	45.6			752.875	1503.74	2	0.3576	132401
Control-1	Myosin-14 OS=Homo sapiens GN=MYH14 PE=1 SV=2	Q7Z406	1	31	33	52	0.000635	0.265	ATDKSFVEK	0.997	66	26.3	46.4			512.769	1023.52	2	-0.7047	392345	P35749,P35579
Control-1	Myosin-14 OS=Homo sapiens GN=MYH14 PE=1 SV=2	Q7Z406	1	31	33	52	0.000635	0.265	cNGVLEGIR	0.997	46.8	26.5	43.1	c1: Carbamidomethyl (+57.02)		509.261	1016.51	2	0.5826	1567780	P35580,P35749,Q9Y623,A7E2Y1,Q9UKX3,P13535,Q9UKX2,P11055,P35579
Control-1	Myosin-14 OS=Homo sapiens GN=MYH14 PE=1 SV=2	Q7Z406	1	31	33	52	0.000635	0.265	DAEVERDEER	0.985	22	25	3.69			624.278	1246.54	2	-0.5627	234606
Control-1	Myosin-14 OS=Homo sapiens GN=MYH14 PE=1 SV=2	Q7Z406	1	31	33	52	0.000635	0.265	DVEGIVGLEQVSSLGDGPPGGRPR	0.997	27.1	28.2	27.1			797.747	2390.22	3	0.5027	1536280
Control-1	Myosin-14 OS=Homo sapiens GN=MYH14 PE=1 SV=2	Q7Z406	1	31	33	52	0.000635	0.265	EAQAALAEAQEDLESER	0.997	55.5	26.6	48			930.435	1858.86	2	0.5366	577220
Control-1	Myosin-14 OS=Homo sapiens GN=MYH14 PE=1 SV=2	Q7Z406	1	31	33	52	0.000635	0.265	EAQAALAEAQEDLESER	0.997	41.8	26.6	41.8			620.626	1858.85	3	0.1355	1027530
Control-1	Myosin-14 OS=Homo sapiens GN=MYH14 PE=1 SV=2	Q7Z406	1	31	33	52	0.000635	0.265	EDQSILcTGESGAGK	0.997	25	25	24.4	c7: Carbamidomethyl (+57.02)		776.352	1550.69	2	0.73	864503	P35580,P35749,P35579
Control-1	Myosin-14 OS=Homo sapiens GN=MYH14 PE=1 SV=2	Q7Z406	1	31	33	52	0.000635	0.265	EDQSILcTGESGAGK	0.997	47	25	47	c7: Carbamidomethyl (+57.02)		776.352	1550.69	2	0.5753	1405600	P35580,P35749,P35579
Control-1	Myosin-14 OS=Homo sapiens GN=MYH14 PE=1 SV=2	Q7Z406	1	31	33	52	0.000635	0.265	EDQSILcTGESGAGKTENTK	0.997	44.4	25.7	40.3	c7: Carbamidomethyl (+57.02)		708.996	2123.97	3	0.3514	846004	P35580,P35749,P35579
Control-1	Myosin-14 OS=Homo sapiens GN=MYH14 PE=1 SV=2	Q7Z406	1	31	33	52	0.000635	0.265	EDQSILcTGESGAGKTENTKK	0.997	26.5	27.5	26.5	c7: Carbamidomethyl (+57.02)		564.022	2252.06	4	0.3643	1084620	P35580,P35749,P35579
Control-1	Myosin-14 OS=Homo sapiens GN=MYH14 PE=1 SV=2	Q7Z406	1	31	33	52	0.000635	0.265	ELEDVTESAESMNR	0.997	49.3	25	49.3			805.355	1608.7	2	0.9431	975276
Control-1	Myosin-14 OS=Homo sapiens GN=MYH14 PE=1 SV=2	Q7Z406	1	31	33	52	0.000635	0.265	ELSSTEAQLHDAQELLQEETR	0.997	31.5	28	31.5			809.727	2426.16	3	1.513	1566510
Control-1	Myosin-14 OS=Homo sapiens GN=MYH14 PE=1 SV=2	Q7Z406	1	31	33	52	0.000635	0.265	EQADFALEALAK	0.997	33.2	27.7	0			653.339	1304.66	2	2.036	2085930	P35579
Control-1	Myosin-14 OS=Homo sapiens GN=MYH14 PE=1 SV=2	Q7Z406	1	31	33	52	0.000635	0.265	EQLEEEAAAR	0.997	24.9	25	19.4			573.276	1144.54	2	0.8887	973181
Control-1	Myosin-14 OS=Homo sapiens GN=MYH14 PE=1 SV=2	Q7Z406	1	31	33	52	0.000635	0.265	EVGELQGR	0.99	31.5	25	26.1			444.233	886.452	2	1.643	1062880
Control-1	Myosin-14 OS=Homo sapiens GN=MYH14 PE=1 SV=2	Q7Z406	1	31	33	52	0.000635	0.265	FDQLLAEEK	0.997	41.1	27.7	33			546.782	1091.55	2	0.2911	3590440	P35580,P35749,P35579
Control-1	Myosin-14 OS=Homo sapiens GN=MYH14 PE=1 SV=2	Q7Z406	1	31	33	52	0.000635	0.265	FLTNGPSSSPGQER	0.997	27.7	27	26.5			738.857	1475.7	2	-0.7733	562208
Control-1	Myosin-14 OS=Homo sapiens GN=MYH14 PE=1 SV=2	Q7Z406	1	31	33	52	0.000635	0.265	GPLTFTTR	0.978	19.9	27	12.4			446.748	891.482	2	-0.02458	1485300
Control-1	Myosin-14 OS=Homo sapiens GN=MYH14 PE=1 SV=2	Q7Z406	1	31	33	52	0.000635	0.265	GPSAGGGPGSGTSPQVEWTAR	0.997	40	26.5	40			978.462	1954.91	2	-1.882	607121
Control-1	Myosin-14 OS=Homo sapiens GN=MYH14 PE=1 SV=2	Q7Z406	1	31	33	52	0.000635	0.265	IHEAAVQELR	0.966	17.3	26.3	17.3			583.32	1164.63	2	0.5646	663738
Control-1	Myosin-14 OS=Homo sapiens GN=MYH14 PE=1 SV=2	Q7Z406	1	31	33	52	0.000635	0.265	KAPPRPGPVPEAAQPFLFTPR	0.983	19.5	25	12.3			569.07	2272.25	4	0.3722	1354860
Control-1	Myosin-14 OS=Homo sapiens GN=MYH14 PE=1 SV=2	Q7Z406	1	31	33	52	0.000635	0.265	KEEELQAALAR	0.997	63.4	27.1	31.5			629.344	1256.67	2	0.3006	5818820	P35749,P35579
Control-1	Myosin-14 OS=Homo sapiens GN=MYH14 PE=1 SV=2	Q7Z406	1	31	33	52	0.000635	0.265	KEEELQAALAR	0.997	38	27.1	23.2			419.899	1256.67	3	0.8763	1418730	P35749,P35579
Control-1	Myosin-14 OS=Homo sapiens GN=MYH14 PE=1 SV=2	Q7Z406	1	31	33	52	0.000635	0.265	KFDQLLAEEK	0.986	23	27.8	7.28			407.556	1219.65	3	1.05	1272700	P35580,P35749,P35579
Control-1	Myosin-14 OS=Homo sapiens GN=MYH14 PE=1 SV=2	Q7Z406	1	31	33	52	0.000635	0.265	KFDQLLAEEK	0.997	60	27.8	39.8			610.83	1219.65	2	0.6374	4445120	P35580,P35749,P35579
Control-1	Myosin-14 OS=Homo sapiens GN=MYH14 PE=1 SV=2	Q7Z406	1	31	33	52	0.000635	0.265	KKLEGELEELK	0.996	31.7	25.9	25.5			439.253	1314.74	3	-1.86	933793
Control-1	Myosin-14 OS=Homo sapiens GN=MYH14 PE=1 SV=2	Q7Z406	1	31	33	52	0.000635	0.265	KQELELVVSELEAR	0.997	30.5	26.8	20.2			548.305	1641.89	3	-0.224	1012240
Control-1	Myosin-14 OS=Homo sapiens GN=MYH14 PE=1 SV=2	Q7Z406	1	31	33	52	0.000635	0.265	LAEFSSQAAEEEEKVK	0.997	40.3	28	40.3			598.964	1793.87	3	1.288	886550
Control-1	Myosin-14 OS=Homo sapiens GN=MYH14 PE=1 SV=2	Q7Z406	1	31	33	52	0.000635	0.265	LALEAEVSELR	0.997	57.1	27.5	44.3			615.341	1228.67	2	0.1936	1677420
Control-1	Myosin-14 OS=Homo sapiens GN=MYH14 PE=1 SV=2	Q7Z406	1	31	33	52	0.000635	0.265	LAQAEEQLEQETR	0.997	40.1	26.7	31.1			772.883	1543.75	2	1.695	1972190
Control-1	Myosin-14 OS=Homo sapiens GN=MYH14 PE=1 SV=2	Q7Z406	1	31	33	52	0.000635	0.265	LLGLGVTDFSR	0.994	40.6	26.2	32.3			589.335	1176.66	2	4.159	1698340
Control-1	Myosin-14 OS=Homo sapiens GN=MYH14 PE=1 SV=2	Q7Z406	1	31	33	52	0.000635	0.265	LLLQVESLTTELSAER	0.997	41.8	26.4	41.8			601.334	1800.98	3	-2.063	396103
Control-1	Myosin-14 OS=Homo sapiens GN=MYH14 PE=1 SV=2	Q7Z406	1	31	33	52	0.000635	0.265	LLLQVESLTTELSAER	0.997	62	26.1	62			901.499	1800.98	2	0.1543	601931
Control-1	Myosin-14 OS=Homo sapiens GN=MYH14 PE=1 SV=2	Q7Z406	1	31	33	52	0.000635	0.265	LQEELAASDR	0.997	61.7	26	43.9			566.287	1130.56	2	1.713	976450
Control-1	Myosin-14 OS=Homo sapiens GN=MYH14 PE=1 SV=2	Q7Z406	1	31	33	52	0.000635	0.265	LQQHIQELEAHLEAEEGAR	0.997	26	28.4	26			734.37	2200.09	3	0.4007	810874
Control-1	Myosin-14 OS=Homo sapiens GN=MYH14 PE=1 SV=2	Q7Z406	1	31	33	52	0.000635	0.265	QLLQANPILEAFGNAK	0.997	29.9	26.1	29.9			576.32	1725.94	3	-1.221	414449	P35749,P35579
Control-1	Myosin-14 OS=Homo sapiens GN=MYH14 PE=1 SV=2	Q7Z406	1	31	33	52	0.000635	0.265	QLLQANPILEAFGNAK	0.997	50.3	25.4	48.4			863.979	1725.94	2	1.238	880792	P35749,P35579
Control-1	Myosin-14 OS=Homo sapiens GN=MYH14 PE=1 SV=2	Q7Z406	1	31	33	52	0.000635	0.265	QLLQANPILEAFGNAKTVK	0.971	18	25	18			685.726	2054.15	3	1.003	746994	P35749,P35579
Control-1	Myosin-14 OS=Homo sapiens GN=MYH14 PE=1 SV=2	Q7Z406	1	31	33	52	0.000635	0.265	RLELQLQEVQGR	0.997	30.5	25	9.08			490.279	1467.81	3	-1.381	1142170
Control-1	Myosin-14 OS=Homo sapiens GN=MYH14 PE=1 SV=2	Q7Z406	1	31	33	52	0.000635	0.265	SMLQDREDQSILcTGESGAGK	0.996	70.2	25.4	70.2	c13: Carbamidomethyl (+57.02)		1141.52	2281.03	2	-0.1083	569725	P35749
Control-1	Myosin-14 OS=Homo sapiens GN=MYH14 PE=1 SV=2	Q7Z406	1	31	33	52	0.000635	0.265	SmLQDREDQSILcTGESGAGK	0.997	25.3	25	25.3	c13: Carbamidomethyl (+57.02)	m2: Oxidation (+15.99)	766.683	2297.03	3	0.5621	948154	P35749
Control-1	Myosin-14 OS=Homo sapiens GN=MYH14 PE=1 SV=2	Q7Z406	1	31	33	52	0.000635	0.265	SMLQDREDQSILcTGESGAGKTENTK	0.997	34.1	26.8	32.1	c13: Carbamidomethyl (+57.02)		714.585	2854.31	4	0.7147	1289310	P35749
Control-1	Myosin-14 OS=Homo sapiens GN=MYH14 PE=1 SV=2	Q7Z406	1	31	33	52	0.000635	0.265	VAQLEEER	0.99	39.7	25.3	37.5			487.251	972.487	2	-0.3923	1179030
Control-1	Myosin-14 OS=Homo sapiens GN=MYH14 PE=1 SV=2	Q7Z406	1	31	33	52	0.000635	0.265	VIQYLAHVASSPK	0.968	17.9	25.5	13.9			471.601	1411.78	3	-0.4232	1086620
Control-1	Myosin-14 OS=Homo sapiens GN=MYH14 PE=1 SV=2	Q7Z406	1	31	33	52	0.000635	0.265	VKPLLQVTR	0.997	35.8	25	30.4			527.343	1052.67	2	0.3208	6866150	P35580,P35749
Control-1	Protein Niban OS=Homo sapiens GN=FAM129A PE=1 SV=1	Q9BZQ8	1	6	7	7	8.55e-05	0.0884	DLTSQFLK	0.974	18	25.4	16.6			476.261	950.508	2	0.08204	752923
Control-1	Protein Niban OS=Homo sapiens GN=FAM129A PE=1 SV=1	Q9BZQ8	1	6	7	7	8.55e-05	0.0884	EVNEVSQNFQTTK	0.997	42.4	27	42.4			762.371	1522.73	2	1.311	616173
Control-1	Protein Niban OS=Homo sapiens GN=FAM129A PE=1 SV=1	Q9BZQ8	1	6	7	7	8.55e-05	0.0884	FSALLSDcVR	0.997	37.9	26.2	37.9	c8: Carbamidomethyl (+57.02)		584.295	1166.57	2	-0.7428	1336880
Control-1	Protein Niban OS=Homo sapiens GN=FAM129A PE=1 SV=1	Q9BZQ8	1	6	7	7	8.55e-05	0.0884	IFQEALVQITLPTVQK	0.979	21.8	25	13.4			610.024	1827.05	3	-0.9069	469719
Control-1	Protein Niban OS=Homo sapiens GN=FAM129A PE=1 SV=1	Q9BZQ8	1	6	7	7	8.55e-05	0.0884	IFQEALVQITLPTVQK	0.997	31.7	25	26.7			914.534	1827.05	2	1.071	461674
Control-1	Protein Niban OS=Homo sapiens GN=FAM129A PE=1 SV=1	Q9BZQ8	1	6	7	7	8.55e-05	0.0884	LMNLPLHSVK	0.986	22.9	25	22.9			384.558	1150.65	3	-0.936	697627
Control-1	Protein Niban OS=Homo sapiens GN=FAM129A PE=1 SV=1	Q9BZQ8	1	6	7	7	8.55e-05	0.0884	TKPPLAPGTILYEAELSQFSEDIKK	0.997	29.2	25.2	29.2			694.627	2774.48	4	1.724	980043
Control-1	Peroxisomal multifunctional enzyme type 2 OS=Homo sapiens GN=HSD17B4 PE=1 SV=3	P51659	1	7	7	7	8.55e-05	0.136	GALVVVNDLGGDFK	0.997	39.4	27.9	39.4			702.38	1402.75	2	-0.2008	1328810
Control-1	Peroxisomal multifunctional enzyme type 2 OS=Homo sapiens GN=HSD17B4 PE=1 SV=3	P51659	1	7	7	7	8.55e-05	0.136	IDVVVNNAGILR	0.997	27.5	25	23.7			641.877	1281.74	2	-1.14	1625570
Control-1	Peroxisomal multifunctional enzyme type 2 OS=Homo sapiens GN=HSD17B4 PE=1 SV=3	P51659	1	7	7	7	8.55e-05	0.136	ISDEDWDIIHR	0.997	59.3	26.1	50.1			466.894	1397.66	3	1.031	762064
Control-1	Peroxisomal multifunctional enzyme type 2 OS=Homo sapiens GN=HSD17B4 PE=1 SV=3	P51659	1	7	7	7	8.55e-05	0.136	LGLLGLANSLAIEGR	0.997	44.4	25	44.4			748.944	1495.87	2	0.1991	912784
Control-1	Peroxisomal multifunctional enzyme type 2 OS=Homo sapiens GN=HSD17B4 PE=1 SV=3	P51659	1	7	7	7	8.55e-05	0.136	TALDAFGR	0.99	29.4	27	29.4			425.725	849.434	2	-0.09635	968907
Control-1	Peroxisomal multifunctional enzyme type 2 OS=Homo sapiens GN=HSD17B4 PE=1 SV=3	P51659	1	7	7	7	8.55e-05	0.136	VAVAIPNRPPDAVLTDTTSLNQAALYR	0.997	55.5	25	55.5			956.186	2865.53	3	-0.0865	728356
Control-1	Peroxisomal multifunctional enzyme type 2 OS=Homo sapiens GN=HSD17B4 PE=1 SV=3	P51659	1	7	7	7	8.55e-05	0.136	VVLVTGAGAGLGR	0.997	36.7	25	36.7			585.355	1168.69	2	1.349	1309120
Control-1	IgGFc-binding protein OS=Homo sapiens GN=FCGBP PE=1 SV=3	Q9Y6R7	1	52	60	61	0.000745	0.165	AGcVAESTAVcR	0.997	57.1	25	57.1	c3: Carbamidomethyl (+57.02), c11: Carbamidomethyl (+57.02)		640.791	1279.57	2	2.021	1094050
Control-1	IgGFc-binding protein OS=Homo sapiens GN=FCGBP PE=1 SV=3	Q9Y6R7	1	52	60	61	0.000745	0.165	AIGYATAADcGR	0.997	38.6	25	34.5	c10: Carbamidomethyl (+57.02)		613.285	1224.56	2	-0.5608	1449750
Control-1	IgGFc-binding protein OS=Homo sapiens GN=FCGBP PE=1 SV=3	Q9Y6R7	1	52	60	61	0.000745	0.165	AISGLTIDGHAVGAK	0.997	29.6	25.3	24.1			470.596	1408.77	3	0.00146	1286140
Control-1	IgGFc-binding protein OS=Homo sapiens GN=FCGBP PE=1 SV=3	Q9Y6R7	1	52	60	61	0.000745	0.165	ALASYVAAcQAAGVVIEDWR	0.997	51.2	28.5	49.9	c9: Carbamidomethyl (+57.02)		717.361	2149.06	3	-1.155	886946
Control-1	IgGFc-binding protein OS=Homo sapiens GN=FCGBP PE=1 SV=3	Q9Y6R7	1	52	60	61	0.000745	0.165	APGWDPLcWDEcR	0.992	23.1	25	23.1	c8: Carbamidomethyl (+57.02), c12: Carbamidomethyl (+57.02)		831.346	1660.68	2	1.1	1092850
Control-1	IgGFc-binding protein OS=Homo sapiens GN=FCGBP PE=1 SV=3	Q9Y6R7	1	52	60	61	0.000745	0.165	AQVGcEITcPENSHYEVcGSPcPAScPSPApLTTPAVcEGPcVEGcQcDAGFVLSADR	0.974	18.1	25	0	c5: Carbamidomethyl (+57.02), c9: Carbamidomethyl (+57.02), c18: Carbamidomethyl (+57.02), c22: Carbamidomethyl (+57.02), c26: Carbamidomethyl (+57.02), c38: Carbamidomethyl (+57.02), c42: Carbamidomethyl (+57.02), c46: Carbamidomethyl (+57.02), c48: Carbamidomethyl (+57.02)	p31: Oxidation (+15.99)	1277.74	6383.66	5	0.8532	278135
Control-1	IgGFc-binding protein OS=Homo sapiens GN=FCGBP PE=1 SV=3	Q9Y6R7	1	52	60	61	0.000745	0.165	ASQHGSDVVIETDFGLR	0.994	64.6	27.9	64.6			915.952	1829.89	2	-1.334	533786
Control-1	IgGFc-binding protein OS=Homo sapiens GN=FCGBP PE=1 SV=3	Q9Y6R7	1	52	60	61	0.000745	0.165	ASQHGSDVVIETDFGLR	0.997	26.2	27.7	26.2			610.971	1829.89	3	0.02843	6070660
Control-1	IgGFc-binding protein OS=Homo sapiens GN=FCGBP PE=1 SV=3	Q9Y6R7	1	52	60	61	0.000745	0.165	AYSHSVSLTR	0.997	37.4	28.1	27			560.792	1119.57	2	1.587	771809
Control-1	IgGFc-binding protein OS=Homo sapiens GN=FCGBP PE=1 SV=3	Q9Y6R7	1	52	60	61	0.000745	0.165	cPGLQNTIPWYR	0.997	51	27.1	41.6	c1: Carbamidomethyl (+57.02)		752.872	1503.73	2	0.4205	1421660
Control-1	IgGFc-binding protein OS=Homo sapiens GN=FCGBP PE=1 SV=3	Q9Y6R7	1	52	60	61	0.000745	0.165	DPcHGVTcRPQETcK	0.997	41.9	25	41.6	c3: Carbamidomethyl (+57.02), c8: Carbamidomethyl (+57.02), c14: Carbamidomethyl (+57.02)		922.897	1843.78	2	1.606	117671
Control-1	IgGFc-binding protein OS=Homo sapiens GN=FCGBP PE=1 SV=3	Q9Y6R7	1	52	60	61	0.000745	0.165	EEFcGLLSSPTGPLSScHK	0.997	34.3	26.1	34.3	c4: Carbamidomethyl (+57.02), c17: Carbamidomethyl (+57.02)		702.66	2104.96	3	0.8174	2063700
Control-1	IgGFc-binding protein OS=Homo sapiens GN=FCGBP PE=1 SV=3	Q9Y6R7	1	52	60	61	0.000745	0.165	EGcVcDAGFVLSGDTcVPVGQcGcLHDGR	0.997	29.3	25	29.3	c3: Carbamidomethyl (+57.02), c5: Carbamidomethyl (+57.02), c16: Carbamidomethyl (+57.02), c22: Carbamidomethyl (+57.02), c24: Carbamidomethyl (+57.02)		1061.45	3181.32	3	0.9005	376884
Control-1	IgGFc-binding protein OS=Homo sapiens GN=FCGBP PE=1 SV=3	Q9Y6R7	1	52	60	61	0.000745	0.165	FDFMGTcVYVLAQTcGTRPGLHR	0.997	37.3	27.5	35.7	c7: Carbamidomethyl (+57.02), c15: Carbamidomethyl (+57.02)		672.324	2685.27	4	1.532	1256180
Control-1	IgGFc-binding protein OS=Homo sapiens GN=FCGBP PE=1 SV=3	Q9Y6R7	1	52	60	61	0.000745	0.165	GATTSPGVYELSSR	0.997	42.1	27.2	42.1			712.855	1423.7	2	1.066	2436890
Control-1	IgGFc-binding protein OS=Homo sapiens GN=FCGBP PE=1 SV=3	Q9Y6R7	1	52	60	61	0.000745	0.165	GcGEGcGPQGcPVcLAEETAPYESNEAcGQLR	0.996	43.9	25	43.9	c2: Carbamidomethyl (+57.02), c6: Carbamidomethyl (+57.02), c11: Carbamidomethyl (+57.02), c14: Carbamidomethyl (+57.02), c28: Carbamidomethyl (+57.02)		1171.82	3512.43	3	3.021	607355
Control-1	IgGFc-binding protein OS=Homo sapiens GN=FCGBP PE=1 SV=3	Q9Y6R7	1	52	60	61	0.000745	0.165	GEVGFVLVDNQR	0.995	63.2	28.8	61.1			666.848	1331.68	2	-1.577	721954
Control-1	IgGFc-binding protein OS=Homo sapiens GN=FCGBP PE=1 SV=3	Q9Y6R7	1	52	60	61	0.000745	0.165	GGGQAANALAFGNSWQEETRPGcGATEPGDcPK	0.995	39.7	25	39.7	c23: Carbamidomethyl (+57.02), c31: Carbamidomethyl (+57.02)		1130.83	3389.47	3	-2.383	356946
Control-1	IgGFc-binding protein OS=Homo sapiens GN=FCGBP PE=1 SV=3	Q9Y6R7	1	52	60	61	0.000745	0.165	GGGQAANALAFGNSWQEETRPGcGATEPGDcPK	0.997	29.1	25	29.1	c23: Carbamidomethyl (+57.02), c31: Carbamidomethyl (+57.02)		848.376	3389.48	4	-1.069	794298
Control-1	IgGFc-binding protein OS=Homo sapiens GN=FCGBP PE=1 SV=3	Q9Y6R7	1	52	60	61	0.000745	0.165	GNPAVSYVR	0.997	31.2	27.7	31.2			481.758	961.5	2	2.491	5288900
Control-1	IgGFc-binding protein OS=Homo sapiens GN=FCGBP PE=1 SV=3	Q9Y6R7	1	52	60	61	0.000745	0.165	GScPTcPEDR	0.997	37.7	25	37.7	c3: Carbamidomethyl (+57.02), c6: Carbamidomethyl (+57.02)		589.732	1177.45	2	-0.07853	290285
Control-1	IgGFc-binding protein OS=Homo sapiens GN=FCGBP PE=1 SV=3	Q9Y6R7	1	52	60	61	0.000745	0.165	GSQAVSYTR	0.997	37.7	25	33.4			484.743	967.472	2	-0.5802	838778
Control-1	IgGFc-binding protein OS=Homo sapiens GN=FCGBP PE=1 SV=3	Q9Y6R7	1	52	60	61	0.000745	0.165	GSQTVSYTR	0.997	37.1	25.4	35.3			499.749	997.483	2	0.2584	723400
Control-1	IgGFc-binding protein OS=Homo sapiens GN=FCGBP PE=1 SV=3	Q9Y6R7	1	52	60	61	0.000745	0.165	ISVAQGASK	0.997	40.2	27.4	28.2			430.745	859.476	2	-0.3741	879525
Control-1	IgGFc-binding protein OS=Homo sapiens GN=FCGBP PE=1 SV=3	Q9Y6R7	1	52	60	61	0.000745	0.165	ISVTQGASK	0.997	29.7	27.4	25.3			445.75	889.486	2	-0.8781	939363
Control-1	IgGFc-binding protein OS=Homo sapiens GN=FCGBP PE=1 SV=3	Q9Y6R7	1	52	60	61	0.000745	0.165	KFDFQGTcNYVLATTGcPGVSTQGLTPFTVTTK	0.997	44.9	27.5	44.9	c8: Carbamidomethyl (+57.02), c17: Carbamidomethyl (+57.02)		1199.59	3595.74	3	0.8762	617804
Control-1	IgGFc-binding protein OS=Homo sapiens GN=FCGBP PE=1 SV=3	Q9Y6R7	1	52	60	61	0.000745	0.165	LASVSVSR	0.99	29.9	27	19.4			409.741	817.468	2	2.539	2836190
Control-1	IgGFc-binding protein OS=Homo sapiens GN=FCGBP PE=1 SV=3	Q9Y6R7	1	52	60	61	0.000745	0.165	LDSLVAQQLQSK	0.984	21.9	26.7	21.9			665.372	1328.73	2	-0.3474	1076550
Control-1	IgGFc-binding protein OS=Homo sapiens GN=FCGBP PE=1 SV=3	Q9Y6R7	1	52	60	61	0.000745	0.165	LEDGVQAcHATGcGR	0.997	27.8	25	26.3	c8: Carbamidomethyl (+57.02), c13: Carbamidomethyl (+57.02)		544.241	1629.7	3	0.7061	1254400
Control-1	IgGFc-binding protein OS=Homo sapiens GN=FCGBP PE=1 SV=3	Q9Y6R7	1	52	60	61	0.000745	0.165	LPVVLANGQIR	0.997	40.4	25	40.4			590.365	1178.71	2	0.6595	1512420
Control-1	IgGFc-binding protein OS=Homo sapiens GN=FCGBP PE=1 SV=3	Q9Y6R7	1	52	60	61	0.000745	0.165	LRVPAAYAASLcGLcGNYNQDPADDLK	0.992	33	28.1	33	c12: Carbamidomethyl (+57.02), c15: Carbamidomethyl (+57.02)		984.813	2951.42	3	8.827	654030
Control-1	IgGFc-binding protein OS=Homo sapiens GN=FCGBP PE=1 SV=3	Q9Y6R7	1	52	60	61	0.000745	0.165	LRVPAAYAGSLcGLcGNYNQDPADDLK	0.997	67	26.9	64.9	c12: Carbamidomethyl (+57.02), c15: Carbamidomethyl (+57.02)		980.134	2937.38	3	1.505	667041
Control-1	IgGFc-binding protein OS=Homo sapiens GN=FCGBP PE=1 SV=3	Q9Y6R7	1	52	60	61	0.000745	0.165	LTYNHGGITGSR	0.996	25.2	27.6	20.5			638.326	1274.64	2	0.6256	384630
Control-1	IgGFc-binding protein OS=Homo sapiens GN=FCGBP PE=1 SV=3	Q9Y6R7	1	52	60	61	0.000745	0.165	NAAGDLQR	0.99	23.7	25	6.12			422.717	843.42	2	0.1398	508184
Control-1	IgGFc-binding protein OS=Homo sapiens GN=FCGBP PE=1 SV=3	Q9Y6R7	1	52	60	61	0.000745	0.165	NPQGPFATcQAVLSPSEYFR	0.997	46.8	27.6	46.8	c9: Carbamidomethyl (+57.02)		1135.04	2268.07	2	2.324	298286
Control-1	IgGFc-binding protein OS=Homo sapiens GN=FCGBP PE=1 SV=3	Q9Y6R7	1	52	60	61	0.000745	0.165	NTGREEFLTAFLQNYQLAYSK	0.997	34.7	28.2	34.7			831.754	2492.24	3	2.199	890231
Control-1	IgGFc-binding protein OS=Homo sapiens GN=FCGBP PE=1 SV=3	Q9Y6R7	1	52	60	61	0.000745	0.165	RPDFcPFQcPAHSHYELcGDScPGScPSLSAPEGcESAcR	0.993	23.1	25	23.1	c5: Carbamidomethyl (+57.02), c9: Carbamidomethyl (+57.02), c18: Carbamidomethyl (+57.02), c22: Carbamidomethyl (+57.02), c26: Carbamidomethyl (+57.02), c35: Carbamidomethyl (+57.02), c39: Carbamidomethyl (+57.02)		929.376	4641.84	5	0.8062	1077190
Control-1	IgGFc-binding protein OS=Homo sapiens GN=FCGBP PE=1 SV=3	Q9Y6R7	1	52	60	61	0.000745	0.165	SLAAYTAAcQAAGVAVKPWR	0.997	38.1	28.1	35.5	c9: Carbamidomethyl (+57.02)		697.699	2090.07	3	0.4145	1230000
Control-1	IgGFc-binding protein OS=Homo sapiens GN=FCGBP PE=1 SV=3	Q9Y6R7	1	52	60	61	0.000745	0.165	SPANcPLScPANSR	0.997	61	25	56.6	c5: Carbamidomethyl (+57.02), c9: Carbamidomethyl (+57.02)		765.843	1529.67	2	0.3054	1851980
Control-1	IgGFc-binding protein OS=Homo sapiens GN=FCGBP PE=1 SV=3	Q9Y6R7	1	52	60	61	0.000745	0.165	SRLPVSLSEGR	0.997	50.8	27.2	46.6			400.895	1199.66	3	0.1017	1412530
Control-1	IgGFc-binding protein OS=Homo sapiens GN=FCGBP PE=1 SV=3	Q9Y6R7	1	52	60	61	0.000745	0.165	TcQGScAALSGLTGcTTR	0.976	17.8	25	17.8	c2: Carbamidomethyl (+57.02), c6: Carbamidomethyl (+57.02), c15: Carbamidomethyl (+57.02)		634.282	1899.82	3	0.3768	1218630
Control-1	IgGFc-binding protein OS=Homo sapiens GN=FCGBP PE=1 SV=3	Q9Y6R7	1	52	60	61	0.000745	0.165	TDSFcPLHcPAHSHYSIcTR	0.997	34.1	25	31.8	c5: Carbamidomethyl (+57.02), c9: Carbamidomethyl (+57.02), c18: Carbamidomethyl (+57.02)		816.023	2445.05	3	2.766	1265660
Control-1	IgGFc-binding protein OS=Homo sapiens GN=FCGBP PE=1 SV=3	Q9Y6R7	1	52	60	61	0.000745	0.165	TDSFcPLHcPAHSHYSIcTR	0.997	45.2	25	45.2	c5: Carbamidomethyl (+57.02), c9: Carbamidomethyl (+57.02), c18: Carbamidomethyl (+57.02)		490.015	2445.04	5	-1.102	1271150
Control-1	IgGFc-binding protein OS=Homo sapiens GN=FCGBP PE=1 SV=3	Q9Y6R7	1	52	60	61	0.000745	0.165	TPDGSLLVR	0.997	39.6	25	31.8			479.272	956.53	2	0.2486	1285440
Control-1	IgGFc-binding protein OS=Homo sapiens GN=FCGBP PE=1 SV=3	Q9Y6R7	1	52	60	61	0.000745	0.165	TVLSPVEPScEGmQcAAGQR	0.973	17.8	25	1.23	c10: Carbamidomethyl (+57.02), c15: Carbamidomethyl (+57.02)	m13: Oxidation (+15.99)	731.663	2191.97	3	0.8876	755321
Control-1	IgGFc-binding protein OS=Homo sapiens GN=FCGBP PE=1 SV=3	Q9Y6R7	1	52	60	61	0.000745	0.165	TVLSPVEPScEGMQcAAGQR	0.997	55.6	25.2	55.6	c10: Carbamidomethyl (+57.02), c15: Carbamidomethyl (+57.02)		726.332	2175.97	3	0.9469	1166030
Control-1	IgGFc-binding protein OS=Homo sapiens GN=FCGBP PE=1 SV=3	Q9Y6R7	1	52	60	61	0.000745	0.165	VAYDLVYYVR	0.997	34.9	29.1	34.9			630.835	1259.66	2	0.9027	5743410
Control-1	IgGFc-binding protein OS=Homo sapiens GN=FCGBP PE=1 SV=3	Q9Y6R7	1	52	60	61	0.000745	0.165	VDVTLPSSYHGAVcGLcGNMDR	0.997	27.2	25	27.2	c14: Carbamidomethyl (+57.02), c17: Carbamidomethyl (+57.02)		803.364	2407.07	3	-0.5517	1244600
Control-1	IgGFc-binding protein OS=Homo sapiens GN=FCGBP PE=1 SV=3	Q9Y6R7	1	52	60	61	0.000745	0.165	VNGVLTALPVSVADGR	0.997	43.6	25	43.6			523.298	1566.87	3	-0.9745	563171
Control-1	IgGFc-binding protein OS=Homo sapiens GN=FCGBP PE=1 SV=3	Q9Y6R7	1	52	60	61	0.000745	0.165	VNGVLTALPVSVADGR	0.997	47.5	25	47.5			784.444	1566.87	2	0.2029	1307500
Control-1	IgGFc-binding protein OS=Homo sapiens GN=FCGBP PE=1 SV=3	Q9Y6R7	1	52	60	61	0.000745	0.165	VNGVLTALPVSVADGR	0.997	36.7	25	36.7			784.446	1566.88	2	2.767	1175100
Control-1	IgGFc-binding protein OS=Homo sapiens GN=FCGBP PE=1 SV=3	Q9Y6R7	1	52	60	61	0.000745	0.165	VPAAYAGSLcGLcGNYNQDPADDLK	0.997	34.2	25.6	34.2	c10: Carbamidomethyl (+57.02), c13: Carbamidomethyl (+57.02)		890.405	2668.19	3	1.252	1731290
Control-1	IgGFc-binding protein OS=Homo sapiens GN=FCGBP PE=1 SV=3	Q9Y6R7	1	52	60	61	0.000745	0.165	VSYVGLVTVR	0.997	43.2	25	43.2			546.824	1091.63	2	0.2362	1261000
Control-1	IgGFc-binding protein OS=Homo sapiens GN=FCGBP PE=1 SV=3	Q9Y6R7	1	52	60	61	0.000745	0.165	VTASSPVAVLSGHScAQK	0.997	45.1	28	45.1	c15: Carbamidomethyl (+57.02)		600.309	1797.91	3	0.7987	942637
Control-1	IgGFc-binding protein OS=Homo sapiens GN=FCGBP PE=1 SV=3	Q9Y6R7	1	52	60	61	0.000745	0.165	VTLQPYNVAQLQSSVDLSGSK	0.995	67.8	27	67.8			1117.59	2233.16	2	2.013	426249
Control-1	IgGFc-binding protein OS=Homo sapiens GN=FCGBP PE=1 SV=3	Q9Y6R7	1	52	60	61	0.000745	0.165	VTLQPYNVAQLQSSVDLSGSK	0.997	55.3	27.4	55.3			745.393	2233.16	3	-1.055	1274210
Control-1	IgGFc-binding protein OS=Homo sapiens GN=FCGBP PE=1 SV=3	Q9Y6R7	1	52	60	61	0.000745	0.165	VVAEVQIcHGK	0.997	41.2	26.5	39.3	c8: Carbamidomethyl (+57.02)		620.331	1238.65	2	2.092	857310
Control-1	IgGFc-binding protein OS=Homo sapiens GN=FCGBP PE=1 SV=3	Q9Y6R7	1	52	60	61	0.000745	0.165	VVAEVQIcHGK	0.997	31.7	27.1	28.7	c8: Carbamidomethyl (+57.02)		413.888	1238.64	3	-0.4786	1762140
Control-1	IgGFc-binding protein OS=Homo sapiens GN=FCGBP PE=1 SV=3	Q9Y6R7	1	52	60	61	0.000745	0.165	YYPLGEVFYPGPEcER	0.997	26.2	25	25.9	c14: Carbamidomethyl (+57.02)		659.302	1974.88	3	0.2767	1012920
Control-1	IgGFc-binding protein OS=Homo sapiens GN=FCGBP PE=1 SV=3	Q9Y6R7	1	52	60	61	0.000745	0.165	YYPLGEVFYPGPEcER	0.997	33.3	25	33.3	c14: Carbamidomethyl (+57.02)		988.449	1974.88	2	0.1684	944845
Control-1	IgGFc-binding protein OS=Homo sapiens GN=FCGBP PE=1 SV=3	Q9Y6R7	1	52	60	61	0.000745	0.165	YYPLGQTFYPGPGcDSLcR	0.985	20.5	25	20.5	c14: Carbamidomethyl (+57.02), c18: Carbamidomethyl (+57.02)		1126	2249.99	2	0.6253	343649
Control-1	Cofilin-1 OS=Homo sapiens GN=CFL1 PE=1 SV=3	P23528	1	6	8	10	0.000122	0.578	AVLFcLSEDKK	0.997	33.1	27.4	28.1	c5: Carbamidomethyl (+57.02)		437.232	1308.68	3	0.3106	1672760
Control-1	Cofilin-1 OS=Homo sapiens GN=CFL1 PE=1 SV=3	P23528	1	6	8	10	0.000122	0.578	EILVGDVGQTVDDPYATFVK	0.997	62.4	28.5	56.5			722.704	2165.09	3	0.3333	1796200
Control-1	Cofilin-1 OS=Homo sapiens GN=CFL1 PE=1 SV=3	P23528	1	6	8	10	0.000122	0.578	EILVGDVGQTVDDPYATFVK	0.997	54.7	28.3	50.7			1083.55	2165.09	2	0.1745	597810
Control-1	Cofilin-1 OS=Homo sapiens GN=CFL1 PE=1 SV=3	P23528	1	6	8	10	0.000122	0.578	HELQANcYEEVKDR	0.997	53.3	25	48	c7: Carbamidomethyl (+57.02)		597.609	1789.81	3	0.3723	1163640
Control-1	Cofilin-1 OS=Homo sapiens GN=CFL1 PE=1 SV=3	P23528	1	6	8	10	0.000122	0.578	KAVLFcLSEDKK	0.997	32.3	26.1	32.3	c6: Carbamidomethyl (+57.02)		479.93	1436.77	3	-0.2248	1049030
Control-1	Cofilin-1 OS=Homo sapiens GN=CFL1 PE=1 SV=3	P23528	1	6	8	10	0.000122	0.578	KEDLVFIFWAPESAPLK	0.997	46.3	26.7	40.7			664.028	1989.06	3	0.05631	574127	Q9Y281
Control-1	Cofilin-1 OS=Homo sapiens GN=CFL1 PE=1 SV=3	P23528	1	6	8	10	0.000122	0.578	LGGSAVISLEGKPL	0.997	70.1	25	70.1			670.893	1339.77	2	0.4311	2776270
Control-1	Cofilin-1 OS=Homo sapiens GN=CFL1 PE=1 SV=3	P23528	1	6	8	10	0.000122	0.578	mLPDKDcR	0.984	20.3	25	14.2	c7: Carbamidomethyl (+57.02)	m1: Oxidation (+15.99)	525.739	1049.46	2	0.4167	224291
Control-1	Cofilin-1 OS=Homo sapiens GN=CFL1 PE=1 SV=3	P23528	1	6	8	10	0.000122	0.578	MLPDKDcR	0.985	21.1	25	16	c7: Carbamidomethyl (+57.02)		517.741	1033.47	2	-0.355	882521
Control-1	Cofilin-1 OS=Homo sapiens GN=CFL1 PE=1 SV=3	P23528	1	6	8	10	0.000122	0.578	YALYDATYETK	0.995	51.6	26	51.6			669.315	1336.62	2	-1.751	978749	Q9Y281
Control-1	Prolyl endopeptidase OS=Homo sapiens GN=PREP PE=1 SV=2	P48147	1	3	3	3	3.66e-05	0.069	AFVEAQNK	0.99	26.8	27.8	-2.68			453.738	905.461	2	0.06405	1595290
Control-1	Prolyl endopeptidase OS=Homo sapiens GN=PREP PE=1 SV=2	P48147	1	3	3	3	3.66e-05	0.069	LYYHVLGTDQSEDILcAEFPDEPK	0.985	22.1	26.8	22.1	c16: Carbamidomethyl (+57.02)		947.109	2838.31	3	-0.3005	508500
Control-1	Prolyl endopeptidase OS=Homo sapiens GN=PREP PE=1 SV=2	P48147	1	3	3	3	3.66e-05	0.069	VFLDPNILSDDGTVALR	0.997	52.7	27.9	50.6			922.99	1843.97	2	-1.28	827882
Control-1	Adenosylhomocysteinase OS=Homo sapiens GN=AHCY PE=1 SV=4	P23526	1	4	4	5	6.1e-05	0.12	ESLIDGIK	0.975	19.6	26.9	0			437.748	873.481	2	-0.2538	497805	O43865,Q96HN2
Control-1	Adenosylhomocysteinase OS=Homo sapiens GN=AHCY PE=1 SV=4	P23526	1	4	4	5	6.1e-05	0.12	GISEETTTGVHNLYK	0.997	46.6	28.1	46.6			550.278	1647.81	3	0.2257	1449390
Control-1	Adenosylhomocysteinase OS=Homo sapiens GN=AHCY PE=1 SV=4	P23526	1	4	4	5	6.1e-05	0.12	VADIGLAAWGR	0.997	51.2	26.1	48.7			564.812	1127.61	2	0.5299	863312
Control-1	Adenosylhomocysteinase OS=Homo sapiens GN=AHCY PE=1 SV=4	P23526	1	4	4	5	6.1e-05	0.12	VNIKPQVDR	0.997	28.9	25	13.6			534.812	1067.61	2	0.7842	541138
Control-1	Adenosylhomocysteinase OS=Homo sapiens GN=AHCY PE=1 SV=4	P23526	1	4	4	5	6.1e-05	0.12	YPQLLPGIR	0.989	22	25	17			528.814	1055.61	2	0.1496	795814
Control-1	Elongation factor 1-delta OS=Homo sapiens GN=EEF1D PE=1 SV=5	P29692	1	3	3	3	3.66e-05	0.217	ATAPQTQHVSPMR	0.984	64.6	27.8	64.6			712.356	1422.7	2	-3.977	299303
Control-1	Elongation factor 1-delta OS=Homo sapiens GN=EEF1D PE=1 SV=5	P29692	1	3	3	3	3.66e-05	0.217	SLAGSSGPGASSGTSGDHGELVVR	0.996	67.9	27.3	67.9			729.022	2184.04	3	1.635	1947990
Control-1	Elongation factor 1-delta OS=Homo sapiens GN=EEF1D PE=1 SV=5	P29692	1	3	3	3	3.66e-05	0.217	SSILLDVKPWDDETDMAQLEAcVR	0.997	26.6	27.9	24.5	c22: Carbamidomethyl (+57.02)		931.115	2790.32	3	0.6329	734279
Control-1	Heterogeneous nuclear ribonucleoprotein U OS=Homo sapiens GN=HNRNPU PE=1 SV=6	Q00839	1	8	8	8	9.77e-05	0.0994	AEGGGGGGRPGAPAAGDGKTEQK	0.997	39.4	27.1	39.4			675.663	2023.97	3	0.06521	117106
Control-1	Heterogeneous nuclear ribonucleoprotein U OS=Homo sapiens GN=HNRNPU PE=1 SV=6	Q00839	1	8	8	8	9.77e-05	0.0994	EKPYFPIPEEYTFIQNVPLEDR	0.997	40.4	28.6	40.4			908.789	2723.35	3	-0.972	964541
Control-1	Heterogeneous nuclear ribonucleoprotein U OS=Homo sapiens GN=HNRNPU PE=1 SV=6	Q00839	1	8	8	8	9.77e-05	0.0994	KAEGGGGGGRPGAPAAGDGK	0.986	23.4	27.5	23.4			556.28	1665.82	3	-0.5207	146775
Control-1	Heterogeneous nuclear ribonucleoprotein U OS=Homo sapiens GN=HNRNPU PE=1 SV=6	Q00839	1	8	8	8	9.77e-05	0.0994	KAEGGGGGGRPGAPAAGDGKTEQK	0.997	50.8	28.2	50.2			718.361	2152.06	3	-1.253	69571.3
Control-1	Heterogeneous nuclear ribonucleoprotein U OS=Homo sapiens GN=HNRNPU PE=1 SV=6	Q00839	1	8	8	8	9.77e-05	0.0994	KAVVVcPK	0.99	40.8	26.4	27.6	c6: Carbamidomethyl (+57.02)		450.77	899.526	2	-0.1857	809344
Control-1	Heterogeneous nuclear ribonucleoprotein U OS=Homo sapiens GN=HNRNPU PE=1 SV=6	Q00839	1	8	8	8	9.77e-05	0.0994	SSGPTSLFAVTVAPPGAR	0.997	61.5	27.4	61.5			857.96	1713.91	2	0.6053	722346
Control-1	Heterogeneous nuclear ribonucleoprotein U OS=Homo sapiens GN=HNRNPU PE=1 SV=6	Q00839	1	8	8	8	9.77e-05	0.0994	VSELKEELK	0.997	49.2	26.5	34.1			537.806	1073.6	2	-0.4113	758943
Control-1	Heterogeneous nuclear ribonucleoprotein U OS=Homo sapiens GN=HNRNPU PE=1 SV=6	Q00839	1	8	8	8	9.77e-05	0.0994	VSELKEELKK	0.975	18.6	25.3	13.3			401.571	1201.69	3	-0.01492	1076220
Control-1	Protein phosphatase 1 regulatory subunit 12C OS=Homo sapiens GN=PPP1R12C PE=1 SV=1	Q9BZL4	1	5	5	5	6.1e-05	0.0908	AAEFLAAcAGGDLDEAR	0.997	50.4	25.2	47.2	c8: Carbamidomethyl (+57.02)		868.901	1735.79	2	2.345	700385
Control-1	Protein phosphatase 1 regulatory subunit 12C OS=Homo sapiens GN=PPP1R12C PE=1 SV=1	Q9BZL4	1	5	5	5	6.1e-05	0.0908	AEAPDGQGPGPQAAR	0.997	40.9	25.9	40.8			711.341	1420.67	2	-1.282	202171
Control-1	Protein phosphatase 1 regulatory subunit 12C OS=Homo sapiens GN=PPP1R12C PE=1 SV=1	Q9BZL4	1	5	5	5	6.1e-05	0.0908	GPAEGEEAEPADR	0.997	44.9	25	44.9			664.292	1326.57	2	0.1643	453210
Control-1	Protein phosphatase 1 regulatory subunit 12C OS=Homo sapiens GN=PPP1R12C PE=1 SV=1	Q9BZL4	1	5	5	5	6.1e-05	0.0908	SQESSTLEGGPSAR	0.997	57.7	25.6	53.8			703.332	1404.65	2	0.6958	438568
Control-1	Protein phosphatase 1 regulatory subunit 12C OS=Homo sapiens GN=PPP1R12C PE=1 SV=1	Q9BZL4	1	5	5	5	6.1e-05	0.0908	TGASALHVAAAK	0.997	40.8	25.8	24.1			548.809	1095.6	2	-0.7131	531619
Control-1	Dermatopontin OS=Homo sapiens GN=DPT PE=1 SV=2	Q07507	1	3	3	3	3.66e-05	0.179	GATTTFSAVER	0.997	50.3	26.4	44.4			570.289	1138.56	2	0.6301	1229240
Control-1	Dermatopontin OS=Homo sapiens GN=DPT PE=1 SV=2	Q07507	1	3	3	3	3.66e-05	0.179	QGFSYQcPQGQVIVAVR	0.988	69.1	28.3	65.6	c7: Carbamidomethyl (+57.02)		968.987	1935.96	2	-2.151	547205
Control-1	Dermatopontin OS=Homo sapiens GN=DPT PE=1 SV=2	Q07507	1	3	3	3	3.66e-05	0.179	YFESVLDR	0.99	24.7	25.6	14			514.757	1027.5	2	1.359	2015500
Control-1	Non-POU domain-containing octamer-binding protein OS=Homo sapiens GN=NONO PE=1 SV=4	Q15233	1	1	1	2	2.44e-05	0.034	AGEVFIHK	0.99	28.2	25.5	21.8			450.75	899.486	2	-0.7795	1201040
Control-1	Non-POU domain-containing octamer-binding protein OS=Homo sapiens GN=NONO PE=1 SV=4	Q15233	1	1	1	2	2.44e-05	0.034	AVVIVDDR	0.99	40.4	25	31.7			443.754	885.493	2	1.126	1421250	P23246
Control-1	Heterogeneous nuclear ribonucleoprotein A1-like 2 OS=Homo sapiens GN=HNRNPA1L2 PE=2 SV=2	Q32P51	0.809	0	0	9	0.00011	0.219	EDSQRPGAHLTVK	0.978	20.8	27.9	17.2			479.92	1436.74	3	-0.3602	994606	P09651
Control-1	Heterogeneous nuclear ribonucleoprotein A1-like 2 OS=Homo sapiens GN=HNRNPA1L2 PE=2 SV=2	Q32P51	0.809	0	0	9	0.00011	0.219	EDSQRPGAHLTVK	0.997	49	27.6	31.5			719.375	1436.74	2	-0.8221	310652	P09651
Control-1	Heterogeneous nuclear ribonucleoprotein A1-like 2 OS=Homo sapiens GN=HNRNPA1L2 PE=2 SV=2	Q32P51	0.809	0	0	9	0.00011	0.219	EDTEEHHLR	0.997	42.5	25	30			389.179	1164.52	3	-0.3328	762271	P22626,P09651
Control-1	Heterogeneous nuclear ribonucleoprotein A1-like 2 OS=Homo sapiens GN=HNRNPA1L2 PE=2 SV=2	Q32P51	0.809	0	0	9	0.00011	0.219	GFAFVTFDDHDSVDK	0.982	19.3	25	19.3			567.259	1698.75	3	0.6013	829570	P09651
Control-1	Heterogeneous nuclear ribonucleoprotein A1-like 2 OS=Homo sapiens GN=HNRNPA1L2 PE=2 SV=2	Q32P51	0.809	0	0	9	0.00011	0.219	GFAFVTFDDHDSVDK	0.997	28.3	25	28.3			567.258	1698.75	3	0.3895	1075060	P09651
Control-1	Heterogeneous nuclear ribonucleoprotein A1-like 2 OS=Homo sapiens GN=HNRNPA1L2 PE=2 SV=2	Q32P51	0.809	0	0	9	0.00011	0.219	IEVIEIMTDR	0.997	69.3	28.2	62.4			609.824	1217.63	2	0.4087	1904940	P09651
Control-1	Heterogeneous nuclear ribonucleoprotein A1-like 2 OS=Homo sapiens GN=HNRNPA1L2 PE=2 SV=2	Q32P51	0.809	0	0	9	0.00011	0.219	IFVGGIKEDTEEHHLR	0.997	33.8	27.7	0			470.748	1878.96	4	1.099	1416340	P22626,P09651
Control-1	Heterogeneous nuclear ribonucleoprotein A1-like 2 OS=Homo sapiens GN=HNRNPA1L2 PE=2 SV=2	Q32P51	0.809	0	0	9	0.00011	0.219	IFVGGIKEDTEEHHLR	0.997	37.2	27.8	0			376.799	1878.96	5	-0.6117	1568760	P22626,P09651
Control-1	Heterogeneous nuclear ribonucleoprotein A1-like 2 OS=Homo sapiens GN=HNRNPA1L2 PE=2 SV=2	Q32P51	0.809	0	0	9	0.00011	0.219	LFIGGLSFETTDESLR	0.997	51.6	27.8	51.6			892.957	1783.9	2	0.223	870568	P09651
Control-1	Synemin OS=Homo sapiens GN=SYNM PE=1 SV=2	O15061	1	55	71	71	0.000867	0.448	AALEALLGR	0.997	40.5	25	24.5			457.277	912.539	2	-0.0897	651014
Control-1	Synemin OS=Homo sapiens GN=SYNM PE=1 SV=2	O15061	1	55	71	71	0.000867	0.448	AASLTMHFR	0.997	46	28.1	41.9			517.266	1032.52	2	0.9076	2433220
Control-1	Synemin OS=Homo sapiens GN=SYNM PE=1 SV=2	O15061	1	55	71	71	0.000867	0.448	APLASFNHSSALYSNLSGHR	0.994	44.3	27.9	44.3			533.017	2128.04	4	-2.862	2925120
Control-1	Synemin OS=Homo sapiens GN=SYNM PE=1 SV=2	O15061	1	55	71	71	0.000867	0.448	APLASFNHSSALYSNLSGHR	0.997	62.8	27.9	62.8			710.356	2128.05	3	0.8934	1417750
Control-1	Synemin OS=Homo sapiens GN=SYNM PE=1 SV=2	O15061	1	55	71	71	0.000867	0.448	ARLEDALLR	0.98	20.3	25	11.8			528.812	1055.61	2	-0.3615	2291410
Control-1	Synemin OS=Homo sapiens GN=SYNM PE=1 SV=2	O15061	1	55	71	71	0.000867	0.448	ATGPAAPPPR	0.997	28.6	26.8	24.6			467.758	933.502	2	-1.029	497795
Control-1	Synemin OS=Homo sapiens GN=SYNM PE=1 SV=2	O15061	1	55	71	71	0.000867	0.448	ATLTLAMADWLR	0.997	61.1	27.4	59.8			681.366	1360.72	2	-0.1483	751918
Control-1	Synemin OS=Homo sapiens GN=SYNM PE=1 SV=2	O15061	1	55	71	71	0.000867	0.448	DKVAAGASESTR	0.997	34.1	27.6	26.2			397.87	1190.59	3	-0.5354	484673
Control-1	Synemin OS=Homo sapiens GN=SYNM PE=1 SV=2	O15061	1	55	71	71	0.000867	0.448	DYQDLLQVK	0.997	36.1	27.7	31.4			561.297	1120.58	2	1.603	2103170
Control-1	Synemin OS=Homo sapiens GN=SYNM PE=1 SV=2	O15061	1	55	71	71	0.000867	0.448	EALGLEQLR	0.997	26.2	26	4.8			514.791	1027.57	2	1.087	953178
Control-1	Synemin OS=Homo sapiens GN=SYNM PE=1 SV=2	O15061	1	55	71	71	0.000867	0.448	EEEGYGESDVTFSVNQHR	0.997	48.3	25	48.3			694.972	2081.89	3	0.2602	1204870
Control-1	Synemin OS=Homo sapiens GN=SYNM PE=1 SV=2	O15061	1	55	71	71	0.000867	0.448	EGFSGQIQFTAPLSDK	0.993	35.2	28.4	28.6			862.933	1723.85	2	5.124	917284
Control-1	Synemin OS=Homo sapiens GN=SYNM PE=1 SV=2	O15061	1	55	71	71	0.000867	0.448	EGQGGPGSVSVDVK	0.997	42.7	26.6	38.3			658.329	1314.64	2	1.154	1320480
Control-1	Synemin OS=Homo sapiens GN=SYNM PE=1 SV=2	O15061	1	55	71	71	0.000867	0.448	EGQGGPGSVSVDVKK	0.997	52.5	27.7	42.9			722.377	1442.74	2	1.37	347022
Control-1	Synemin OS=Homo sapiens GN=SYNM PE=1 SV=2	O15061	1	55	71	71	0.000867	0.448	EIIFQGPISAAGK	0.997	28.2	27.4	23.4			665.873	1329.73	2	0.8251	1838290
Control-1	Synemin OS=Homo sapiens GN=SYNM PE=1 SV=2	O15061	1	55	71	71	0.000867	0.448	ELERENLLLEEELR	0.99	27.1	27.2	21			595.649	1783.93	3	-3.007	1016550
Control-1	Synemin OS=Homo sapiens GN=SYNM PE=1 SV=2	O15061	1	55	71	71	0.000867	0.448	ELYIPSGESEVAGGASHSSGQR	0.983	68.7	26.5	68.3			1109.52	2217.02	2	-2.417	532915
Control-1	Synemin OS=Homo sapiens GN=SYNM PE=1 SV=2	O15061	1	55	71	71	0.000867	0.448	ELYIPSGESEVAGGASHSSGQR	0.997	40.4	26.9	34.4			740.019	2217.04	3	2.363	4368800
Control-1	Synemin OS=Homo sapiens GN=SYNM PE=1 SV=2	O15061	1	55	71	71	0.000867	0.448	ENLLLEEELR	0.997	45.5	26.4	26			629.338	1256.66	2	-0.2083	1308990
Control-1	Synemin OS=Homo sapiens GN=SYNM PE=1 SV=2	O15061	1	55	71	71	0.000867	0.448	EQAMFDKK	0.99	28.9	25	23.1			498.744	995.474	2	-0.3632	601898
Control-1	Synemin OS=Homo sapiens GN=SYNM PE=1 SV=2	O15061	1	55	71	71	0.000867	0.448	EQGKEQAMFDKK	0.997	38.4	27.1	30.4			719.854	1437.69	2	0.6798	139392
Control-1	Synemin OS=Homo sapiens GN=SYNM PE=1 SV=2	O15061	1	55	71	71	0.000867	0.448	EREVPISLEVSQDR	0.997	29.5	27.6	24.6			552.957	1655.85	3	-0.1074	1255600
Control-1	Synemin OS=Homo sapiens GN=SYNM PE=1 SV=2	O15061	1	55	71	71	0.000867	0.448	ETVQLYEDEVR	0.997	33.4	26.9	26.5			690.836	1379.66	2	0.6939	2668670
Control-1	Synemin OS=Homo sapiens GN=SYNM PE=1 SV=2	O15061	1	55	71	71	0.000867	0.448	EVHDSYALLVAESWR	0.977	20.6	27.7	12.9			592.297	1773.87	3	-0.3876	3707570
Control-1	Synemin OS=Homo sapiens GN=SYNM PE=1 SV=2	O15061	1	55	71	71	0.000867	0.448	EVIFLGPAPAcPEAWGSPEPGPAESSADMDGSGR	0.997	27.1	25	27.1	c11: Carbamidomethyl (+57.02)		1147.85	3440.53	3	0.9173	329712
Control-1	Synemin OS=Homo sapiens GN=SYNM PE=1 SV=2	O15061	1	55	71	71	0.000867	0.448	EVPISLEVSQDR	0.997	31.5	27.5	30.8			686.361	1370.71	2	1.632	1458280
Control-1	Synemin OS=Homo sapiens GN=SYNM PE=1 SV=2	O15061	1	55	71	71	0.000867	0.448	EVPVYIGEDSTIAR	0.997	55.1	28.3	55.1			516.935	1547.78	3	-1.012	875098
Control-1	Synemin OS=Homo sapiens GN=SYNM PE=1 SV=2	O15061	1	55	71	71	0.000867	0.448	EVPVYIGEDSTIAR	0.997	38.8	28.3	35.2			774.9	1547.79	2	1.277	1443850
Control-1	Synemin OS=Homo sapiens GN=SYNM PE=1 SV=2	O15061	1	55	71	71	0.000867	0.448	GFLGSGYSSSATTQQENSYGK	0.976	85.8	25	85.8			1084.99	2167.97	2	2.046	384076
Control-1	Synemin OS=Homo sapiens GN=SYNM PE=1 SV=2	O15061	1	55	71	71	0.000867	0.448	GFLGSGYSSSATTQQENSYGK	0.997	50.9	25	50.9			723.662	2167.96	3	-0.5477	1419440
Control-1	Synemin OS=Homo sapiens GN=SYNM PE=1 SV=2	O15061	1	55	71	71	0.000867	0.448	GRLDAELGAQQR	0.985	22.1	26.5	14.2			438.57	1312.69	3	1.341	1870430
Control-1	Synemin OS=Homo sapiens GN=SYNM PE=1 SV=2	O15061	1	55	71	71	0.000867	0.448	GRLDAELGAQQR	0.997	40.9	26.6	27.4			657.351	1312.69	2	1.536	519342
Control-1	Synemin OS=Homo sapiens GN=SYNM PE=1 SV=2	O15061	1	55	71	71	0.000867	0.448	GSQTGTSIGGDAR	0.997	51.1	25	49			603.789	1205.56	2	-1.062	399665
Control-1	Synemin OS=Homo sapiens GN=SYNM PE=1 SV=2	O15061	1	55	71	71	0.000867	0.448	HISIGPQR	0.973	17.7	25.5	17.4			454.259	906.504	2	0.637	1961580
Control-1	Synemin OS=Homo sapiens GN=SYNM PE=1 SV=2	O15061	1	55	71	71	0.000867	0.448	HVTLGPGQSPLSR	0.997	37	26.8	37			450.25	1347.73	3	1.759	1980390
Control-1	Synemin OS=Homo sapiens GN=SYNM PE=1 SV=2	O15061	1	55	71	71	0.000867	0.448	LcAQEAEALRR	0.995	25.2	27.8	12.8	c2: Carbamidomethyl (+57.02)		439.563	1315.67	3	0.03551	3224070
Control-1	Synemin OS=Homo sapiens GN=SYNM PE=1 SV=2	O15061	1	55	71	71	0.000867	0.448	LDAELGAQQR	0.997	34.7	26.6	18.9			550.788	1099.56	2	-0.6741	1300750
Control-1	Synemin OS=Homo sapiens GN=SYNM PE=1 SV=2	O15061	1	55	71	71	0.000867	0.448	LGPSEVWR	0.99	37	25.5	36.2			472.254	942.493	2	0.8882	1314640
Control-1	Synemin OS=Homo sapiens GN=SYNM PE=1 SV=2	O15061	1	55	71	71	0.000867	0.448	LGPTETETSEHIAIR	0.997	56.6	27.9	55.6			551.954	1652.84	3	1.67	1927080
Control-1	Synemin OS=Homo sapiens GN=SYNM PE=1 SV=2	O15061	1	55	71	71	0.000867	0.448	LQAEEETR	0.99	41.2	25	17.2			488.241	974.468	2	0.6131	1445700
Control-1	Synemin OS=Homo sapiens GN=SYNM PE=1 SV=2	O15061	1	55	71	71	0.000867	0.448	LTEDVDVSDEAGLDYLLSK	0.983	72.8	27.9	72.8			1041.51	2081	2	-2.047	1272180
Control-1	Synemin OS=Homo sapiens GN=SYNM PE=1 SV=2	O15061	1	55	71	71	0.000867	0.448	LTEDVDVSDEAGLDYLLSK	0.987	23.2	28	23.2			694.676	2081.01	3	0.9376	702618
Control-1	Synemin OS=Homo sapiens GN=SYNM PE=1 SV=2	O15061	1	55	71	71	0.000867	0.448	MREELSALTR	0.968	18.8	28.2	11.3			603.319	1204.62	2	-0.267	936252
Control-1	Synemin OS=Homo sapiens GN=SYNM PE=1 SV=2	O15061	1	55	71	71	0.000867	0.448	MREELSALTR	0.997	42.2	28.4	27.2			402.548	1204.62	3	-0.006587	2105910
Control-1	Synemin OS=Homo sapiens GN=SYNM PE=1 SV=2	O15061	1	55	71	71	0.000867	0.448	mREEYGIQAEER	0.983	19.9	25	19.9		m1: Oxidation (+15.99)	509.569	1525.68	3	0.4566	881254
Control-1	Synemin OS=Homo sapiens GN=SYNM PE=1 SV=2	O15061	1	55	71	71	0.000867	0.448	MREEYGIQAEER	0.986	21.9	25	16.5			504.237	1509.69	3	1.272	1403630
Control-1	Synemin OS=Homo sapiens GN=SYNM PE=1 SV=2	O15061	1	55	71	71	0.000867	0.448	MSYEGPTAEVVEVSAGGDLSQAASPTGASR	0.997	52.7	27.4	48.4			975.459	2923.36	3	1.591	611847
Control-1	Synemin OS=Homo sapiens GN=SYNM PE=1 SV=2	O15061	1	55	71	71	0.000867	0.448	mSYEGPTAEVVEVSAGGDLSQAASPTGASR	0.997	34	26.3	9.89		m1: Oxidation (+15.99)	980.791	2939.35	3	2.043	463578
Control-1	Synemin OS=Homo sapiens GN=SYNM PE=1 SV=2	O15061	1	55	71	71	0.000867	0.448	QQLDELSWATALAEGER	0.996	55.3	27.9	55.3			958.973	1915.93	2	2.388	659051
Control-1	Synemin OS=Homo sapiens GN=SYNM PE=1 SV=2	O15061	1	55	71	71	0.000867	0.448	QQLDELSWATALAEGER	0.997	27.2	27.8	27.2			639.65	1915.93	3	0.914	717110
Control-1	Synemin OS=Homo sapiens GN=SYNM PE=1 SV=2	O15061	1	55	71	71	0.000867	0.448	QQLVEVIGQLEETLPER	0.995	77.3	26.4	74.7			991.034	1980.05	2	0.4331	880599
Control-1	Synemin OS=Homo sapiens GN=SYNM PE=1 SV=2	O15061	1	55	71	71	0.000867	0.448	QQLVEVIGQLEETLPER	0.997	50	26.5	43.9			661.025	1980.05	3	-0.4634	1173650
Control-1	Synemin OS=Homo sapiens GN=SYNM PE=1 SV=2	O15061	1	55	71	71	0.000867	0.448	QRSPAPGSPDEEGGAEAPAAGIR	0.997	41.6	27.7	41.6			740.693	2219.06	3	-0.2468	615878
Control-1	Synemin OS=Homo sapiens GN=SYNM PE=1 SV=2	O15061	1	55	71	71	0.000867	0.448	RGFLGSGYSSSATTQQENSYGK	0.997	54.6	26.6	54.6			775.697	2324.07	3	1.05	1368560
Control-1	Synemin OS=Homo sapiens GN=SYNM PE=1 SV=2	O15061	1	55	71	71	0.000867	0.448	RGLDAAHER	0.965	16.8	26.1	7.57			512.768	1023.52	2	0.3885	270663
Control-1	Synemin OS=Homo sapiens GN=SYNM PE=1 SV=2	O15061	1	55	71	71	0.000867	0.448	SGEFHAEPTVIEK	0.997	42.3	27.2	30			722.361	1442.71	2	2.825	1008260
Control-1	Synemin OS=Homo sapiens GN=SYNM PE=1 SV=2	O15061	1	55	71	71	0.000867	0.448	SGEFHAEPTVIEK	0.997	44.6	27.1	42.2			481.909	1442.7	3	0.2923	1844460
Control-1	Synemin OS=Homo sapiens GN=SYNM PE=1 SV=2	O15061	1	55	71	71	0.000867	0.448	SPAPGSPDEEGGAEAPAAGIR	0.997	27.8	26.7	27.8			645.973	1934.9	3	-0.7789	1518130
Control-1	Synemin OS=Homo sapiens GN=SYNM PE=1 SV=2	O15061	1	55	71	71	0.000867	0.448	SPAPGSPDEEGGAEAPAAGIR	0.997	37.5	26.8	37.5			968.457	1934.9	2	1.094	556929
Control-1	Synemin OS=Homo sapiens GN=SYNM PE=1 SV=2	O15061	1	55	71	71	0.000867	0.448	SVISDEKK	0.99	30.8	27.1	16.3			453.251	904.487	2	-0.002144	555727
Control-1	Synemin OS=Homo sapiens GN=SYNM PE=1 SV=2	O15061	1	55	71	71	0.000867	0.448	SYHYTDSLLQR	0.997	52.8	26.9	46.9			461.562	1381.66	3	0.5222	2513920
Control-1	Synemin OS=Homo sapiens GN=SYNM PE=1 SV=2	O15061	1	55	71	71	0.000867	0.448	SYHYTDSLLQR	0.997	39.1	26.7	34.2			691.839	1381.66	2	0.3747	1592480
Control-1	Synemin OS=Homo sapiens GN=SYNM PE=1 SV=2	O15061	1	55	71	71	0.000867	0.448	TFSPTYGLLR	0.986	22.2	26.6	14.8			577.814	1153.61	2	-0.3308	1544180
Control-1	Synemin OS=Homo sapiens GN=SYNM PE=1 SV=2	O15061	1	55	71	71	0.000867	0.448	TFVLAGSADSPELGK	0.997	66.4	28.4	53.6			746.388	1490.76	2	-0.2828	1250170
Control-1	Synemin OS=Homo sapiens GN=SYNM PE=1 SV=2	O15061	1	55	71	71	0.000867	0.448	TPQGPVSATVEVSSPTGFAQSQVLEDVSQAAR	0.991	84	28.3	81.4			1081.88	3242.61	3	0.5802	1604940
Control-1	Synemin OS=Homo sapiens GN=SYNM PE=1 SV=2	O15061	1	55	71	71	0.000867	0.448	TPQGPVSATVEVSSPTGFAQSQVLEDVSQAAR	0.997	48	28.3	43.1			811.658	3242.6	4	-0.3003	1434380
Control-1	Synemin OS=Homo sapiens GN=SYNM PE=1 SV=2	O15061	1	55	71	71	0.000867	0.448	VEEVEDVSPGPWGLVK	0.986	24.2	27.6	24.2			870.446	1738.88	2	-0.8058	674227
Control-1	Synemin OS=Homo sapiens GN=SYNM PE=1 SV=2	O15061	1	55	71	71	0.000867	0.448	VGDYFATEESVGTQTSVR	0.997	56.5	26.7	56.5			973.461	1944.91	2	-0.05239	724697
Control-1	Synemin OS=Homo sapiens GN=SYNM PE=1 SV=2	O15061	1	55	71	71	0.000867	0.448	VVKPLDVPAPSLEGDLGSTHWK	0.993	27.2	25.7	27.2			782.425	2344.25	3	4.525	1116260
Control-1	Synemin OS=Homo sapiens GN=SYNM PE=1 SV=2	O15061	1	55	71	71	0.000867	0.448	VVKPLDVPAPSLEGDLGSTHWK	0.997	33.2	26.3	33.2			587.068	2344.24	4	-0.1936	1992940
Control-1	Synemin OS=Homo sapiens GN=SYNM PE=1 SV=2	O15061	1	55	71	71	0.000867	0.448	YSWQDEIVQGTR	0.993	80.4	26.7	66.5			741.355	1480.69	2	0.1067	1686630
Control-1	Histone H1.5 OS=Homo sapiens GN=HIST1H1B PE=1 SV=3	P16401	1	3	4	5	6.1e-05	0.106	ALAAGGYDVEK	0.997	56	27	49.8			547.28	1092.55	2	0.8944	4029460
Control-1	Histone H1.5 OS=Homo sapiens GN=HIST1H1B PE=1 SV=3	P16401	1	3	4	5	6.1e-05	0.106	ATGPPVSELITK	0.997	56.4	25	56.4			606.845	1211.68	2	-0.9087	1166760
Control-1	Histone H1.5 OS=Homo sapiens GN=HIST1H1B PE=1 SV=3	P16401	1	3	4	5	6.1e-05	0.106	KATGPPVSELITK	0.997	24.9	25	24.9			447.598	1339.77	3	-0.5205	2113660
Control-1	Histone H1.5 OS=Homo sapiens GN=HIST1H1B PE=1 SV=3	P16401	1	3	4	5	6.1e-05	0.106	KATGPPVSELITK	0.997	46.5	25	37			670.892	1339.77	2	-0.9412	1023680
Control-1	Histone H1.5 OS=Homo sapiens GN=HIST1H1B PE=1 SV=3	P16401	1	3	4	5	6.1e-05	0.106	KATGPPVSELITK	0.997	30.2	25	20.2			447.597	1339.77	3	-0.9233	2659450
Control-1	Neutral alpha-glucosidase AB OS=Homo sapiens GN=GANAB PE=1 SV=3	Q14697	1	13	14	14	0.000171	0.171	AEKDEPGAWEETFK	0.978	22.7	25.3	22.7			546.254	1635.74	3	-1.092	1373070
Control-1	Neutral alpha-glucosidase AB OS=Homo sapiens GN=GANAB PE=1 SV=3	Q14697	1	13	14	14	0.000171	0.171	AFFAGSQR	0.985	21.3	25	11			442.224	882.434	2	-0.3871	1833030
Control-1	Neutral alpha-glucosidase AB OS=Homo sapiens GN=GANAB PE=1 SV=3	Q14697	1	13	14	14	0.000171	0.171	AHAHLDTGR	0.997	35.7	26.9	33.2			489.249	976.484	2	-0.3703	445863
Control-1	Neutral alpha-glucosidase AB OS=Homo sapiens GN=GANAB PE=1 SV=3	Q14697	1	13	14	14	0.000171	0.171	AHAHLDTGRR	0.983	21	27	15			567.3	1132.59	2	0.1041	177736
Control-1	Neutral alpha-glucosidase AB OS=Homo sapiens GN=GANAB PE=1 SV=3	Q14697	1	13	14	14	0.000171	0.171	DENSVELTMAEGPYK	0.997	55.7	25	55.7			841.884	1681.75	2	1.33	760020
Control-1	Neutral alpha-glucosidase AB OS=Homo sapiens GN=GANAB PE=1 SV=3	Q14697	1	13	14	14	0.000171	0.171	EPWLLPSQHNDIIR	0.974	19.7	28.1	19.7			573.306	1716.89	3	0.001198	959942
Control-1	Neutral alpha-glucosidase AB OS=Homo sapiens GN=GANAB PE=1 SV=3	Q14697	1	13	14	14	0.000171	0.171	FRIDELEPR	0.997	36.3	28.5	26.8			392.212	1173.61	3	-0.143	610252
Control-1	Neutral alpha-glucosidase AB OS=Homo sapiens GN=GANAB PE=1 SV=3	Q14697	1	13	14	14	0.000171	0.171	GLLEFEHQR	0.997	25.8	26.5	15.1			564.794	1127.57	2	0.335	1353380
Control-1	Neutral alpha-glucosidase AB OS=Homo sapiens GN=GANAB PE=1 SV=3	Q14697	1	13	14	14	0.000171	0.171	GLLEFEHQR	0.997	33.3	26.5	33.3			376.865	1127.57	3	0.1968	1246820
Control-1	Neutral alpha-glucosidase AB OS=Homo sapiens GN=GANAB PE=1 SV=3	Q14697	1	13	14	14	0.000171	0.171	HHGPQTLYLPVTLSSIPVFQR	0.997	34.3	25	29			598.33	2389.29	4	0.7472	654361
Control-1	Neutral alpha-glucosidase AB OS=Homo sapiens GN=GANAB PE=1 SV=3	Q14697	1	13	14	14	0.000171	0.171	LSFQHDPETSVLVLR	0.997	36	27.4	33			580.98	1739.92	3	-0.7858	1349110
Control-1	Neutral alpha-glucosidase AB OS=Homo sapiens GN=GANAB PE=1 SV=3	Q14697	1	13	14	14	0.000171	0.171	SIRPGLSPYR	0.997	26.7	26.9	23.2			382.553	1144.64	3	1.678	964739
Control-1	Neutral alpha-glucosidase AB OS=Homo sapiens GN=GANAB PE=1 SV=3	Q14697	1	13	14	14	0.000171	0.171	VSQGSKDPAEGDGAQPEETPR	0.997	53	25.4	53			719.002	2153.98	3	0.7991	344948
Control-1	Neutral alpha-glucosidase AB OS=Homo sapiens GN=GANAB PE=1 SV=3	Q14697	1	13	14	14	0.000171	0.171	YRVPDVLVADPPIAR	0.997	26.3	25	26.3			560.986	1679.94	3	0.2035	2277580
Control-1	Tropomyosin alpha-4 chain OS=Homo sapiens GN=TPM4 PE=1 SV=3	P67936	1	5	6	41	0.000501	0.508	AEVSELKcGDLEEELK	0.992	23.8	27.2	1.79	c8: Carbamidomethyl (+57.02)		924.949	1847.88	2	0.2665	532551
Control-1	Tropomyosin alpha-4 chain OS=Homo sapiens GN=TPM4 PE=1 SV=3	P67936	1	5	6	41	0.000501	0.508	AMKDEEKMEIQEMQLK	0.996	45.6	27.2	0			660.985	1979.93	3	-2.129	1239210	P07951
Control-1	Tropomyosin alpha-4 chain OS=Homo sapiens GN=TPM4 PE=1 SV=3	P67936	1	5	6	41	0.000501	0.508	EDKYEEEIK	0.981	19.8	25	4.3			591.78	1181.55	2	-0.2892	453381	P06753,P07951
Control-1	Tropomyosin alpha-4 chain OS=Homo sapiens GN=TPM4 PE=1 SV=3	P67936	1	5	6	41	0.000501	0.508	HIAEEADR	0.99	33.9	25	29.5			470.728	939.44	2	-0.6401	756940	P06753
Control-1	Tropomyosin alpha-4 chain OS=Homo sapiens GN=TPM4 PE=1 SV=3	P67936	1	5	6	41	0.000501	0.508	IQALQQQADEAEDR	0.997	46.4	26.5	42.7			807.89	1613.77	2	0.8162	549682
Control-1	Tropomyosin alpha-4 chain OS=Homo sapiens GN=TPM4 PE=1 SV=3	P67936	1	5	6	41	0.000501	0.508	IQLVEEELDR	0.966	18.6	27.3	14.8			622.33	1242.65	2	-0.3232	632088	P09493,P06753,P07951
Control-1	Tropomyosin alpha-4 chain OS=Homo sapiens GN=TPM4 PE=1 SV=3	P67936	1	5	6	41	0.000501	0.508	IQLVEEELDR	0.979	20.8	27.3	20.8			622.33	1242.65	2	-0.3232	1039290	P09493,P06753,P07951
Control-1	Tropomyosin alpha-4 chain OS=Homo sapiens GN=TPM4 PE=1 SV=3	P67936	1	5	6	41	0.000501	0.508	IQLVEEELDR	0.996	31.2	26.7	31.2			622.329	1242.64	2	-1.996	939617	P09493,P06753,P07951
Control-1	Tropomyosin alpha-4 chain OS=Homo sapiens GN=TPM4 PE=1 SV=3	P67936	1	5	6	41	0.000501	0.508	IQLVEEELDR	0.997	30.9	27.4	25.2			622.33	1242.64	2	-1.015	1290660	P09493,P06753,P07951
Control-1	Tropomyosin alpha-4 chain OS=Homo sapiens GN=TPM4 PE=1 SV=3	P67936	1	5	6	41	0.000501	0.508	IQLVEEELDR	0.997	27.6	27.3	21.9			622.33	1242.65	2	-0.3232	686244	P09493,P06753,P07951
Control-1	Tropomyosin alpha-4 chain OS=Homo sapiens GN=TPM4 PE=1 SV=3	P67936	1	5	6	41	0.000501	0.508	IQLVEEELDR	0.997	28.9	27.5	18.3			622.331	1242.65	2	1.14	857321	P09493,P06753,P07951
Control-1	Tropomyosin alpha-4 chain OS=Homo sapiens GN=TPM4 PE=1 SV=3	P67936	1	5	6	41	0.000501	0.508	IQLVEEELDR	0.997	43.5	27.3	38			622.33	1242.65	2	-0.5323	1501610	P09493,P06753,P07951
Control-1	Tropomyosin alpha-4 chain OS=Homo sapiens GN=TPM4 PE=1 SV=3	P67936	1	5	6	41	0.000501	0.508	IQLVEEELDR	0.997	32.8	27.5	24.9			622.331	1242.65	2	1.14	1892430	P09493,P06753,P07951
Control-1	Tropomyosin alpha-4 chain OS=Homo sapiens GN=TPM4 PE=1 SV=3	P67936	1	5	6	41	0.000501	0.508	IQLVEEELDR	0.997	35	27.5	20.7			622.331	1242.65	2	1.14	1897810	P09493,P06753,P07951
Control-1	Tropomyosin alpha-4 chain OS=Homo sapiens GN=TPM4 PE=1 SV=3	P67936	1	5	6	41	0.000501	0.508	IQLVEEELDR	0.997	44.6	27.6	34.1			622.33	1242.65	2	0.1593	4495440	P09493,P06753,P07951
Control-1	Tropomyosin alpha-4 chain OS=Homo sapiens GN=TPM4 PE=1 SV=3	P67936	1	5	6	41	0.000501	0.508	IQLVEEELDR	0.997	37	27.6	34.8			622.33	1242.65	2	0.2557	783291	P09493,P06753,P07951
Control-1	Tropomyosin alpha-4 chain OS=Homo sapiens GN=TPM4 PE=1 SV=3	P67936	1	5	6	41	0.000501	0.508	IQLVEEELDR	0.997	37.5	27.3	35.3			622.33	1242.64	2	-0.6287	2738380	P09493,P06753,P07951
Control-1	Tropomyosin alpha-4 chain OS=Homo sapiens GN=TPM4 PE=1 SV=3	P67936	1	5	6	41	0.000501	0.508	IQLVEEELDRAQER	0.996	30	27.4	29.7			864.448	1726.88	2	-1.807	635024	P09493,P06753,P07951
Control-1	Tropomyosin alpha-4 chain OS=Homo sapiens GN=TPM4 PE=1 SV=3	P67936	1	5	6	41	0.000501	0.508	IQLVEEELDRAQER	0.997	49	27.3	48.1			576.636	1726.89	3	0.3369	1789520	P09493,P06753,P07951
Control-1	Tropomyosin alpha-4 chain OS=Homo sapiens GN=TPM4 PE=1 SV=3	P67936	1	5	6	41	0.000501	0.508	KIQALQQQADEAEDR	0.994	48.7	27.8	43.7			581.629	1741.87	3	3.668	763850
Control-1	Tropomyosin alpha-4 chain OS=Homo sapiens GN=TPM4 PE=1 SV=3	P67936	1	5	6	41	0.000501	0.508	KLVILEGELER	0.997	46.3	25	44.8			649.888	1297.76	2	0.0601	5207420	P07951
Control-1	Tropomyosin alpha-4 chain OS=Homo sapiens GN=TPM4 PE=1 SV=3	P67936	1	5	6	41	0.000501	0.508	KLVILEGELER	0.997	39.2	25	33.7			649.888	1297.76	2	-0.2325	997105	P07951
Control-1	Tropomyosin alpha-4 chain OS=Homo sapiens GN=TPM4 PE=1 SV=3	P67936	1	5	6	41	0.000501	0.508	KLVILEGELER	0.997	37	25	33.8			433.594	1297.76	3	-0.6914	2100560	P07951
Control-1	Tropomyosin alpha-4 chain OS=Homo sapiens GN=TPM4 PE=1 SV=3	P67936	1	5	6	41	0.000501	0.508	KLVILEGELER	0.997	38.8	25	32.3			433.594	1297.76	3	-0.83	1353220	P07951
Control-1	Tropomyosin alpha-4 chain OS=Homo sapiens GN=TPM4 PE=1 SV=3	P67936	1	5	6	41	0.000501	0.508	LATALQKLEEAEK	0.997	57.4	26.9	50.6			481.94	1442.8	3	-0.8782	1816070	P09493,P06753,P07951
Control-1	Tropomyosin alpha-4 chain OS=Homo sapiens GN=TPM4 PE=1 SV=3	P67936	1	5	6	41	0.000501	0.508	LATALQKLEEAEK	0.997	38	26.9	33			722.406	1442.8	2	-0.223	1387420	P09493,P06753,P07951
Control-1	Tropomyosin alpha-4 chain OS=Homo sapiens GN=TPM4 PE=1 SV=3	P67936	1	5	6	41	0.000501	0.508	LEEAEKAADESER	0.997	64.8	25.5	58.4			738.845	1475.68	2	1.312	315174	P09493,P06753,P07951
Control-1	Tropomyosin alpha-4 chain OS=Homo sapiens GN=TPM4 PE=1 SV=3	P67936	1	5	6	41	0.000501	0.508	LEEAEKAADESER	0.997	46.5	25.4	46.5			492.898	1475.67	3	-0.6352	978391	P09493,P06753,P07951
Control-1	Tropomyosin alpha-4 chain OS=Homo sapiens GN=TPM4 PE=1 SV=3	P67936	1	5	6	41	0.000501	0.508	LEKTIDDLEEK	0.997	38.3	28.2	18.7			666.849	1331.68	2	0.6288	969470
Control-1	Tropomyosin alpha-4 chain OS=Homo sapiens GN=TPM4 PE=1 SV=3	P67936	1	5	6	41	0.000501	0.508	LVILEGELER	0.997	47.5	25	26.8			585.84	1169.67	2	-0.5484	1324350	P07951
Control-1	Tropomyosin alpha-4 chain OS=Homo sapiens GN=TPM4 PE=1 SV=3	P67936	1	5	6	41	0.000501	0.508	LVILEGELER	0.997	32.5	25	12.6			585.841	1169.67	2	0.9209	1179540	P07951
Control-1	Tropomyosin alpha-4 chain OS=Homo sapiens GN=TPM4 PE=1 SV=3	P67936	1	5	6	41	0.000501	0.508	LVILEGELER	0.997	38	25	26.8			585.841	1169.67	2	1.023	678922	P07951
Control-1	Tropomyosin alpha-4 chain OS=Homo sapiens GN=TPM4 PE=1 SV=3	P67936	1	5	6	41	0.000501	0.508	mEIQEMQLK	0.997	28.9	26.3	0		m1: Oxidation (+15.99)	583.283	1164.55	2	-0.3062	1625530	P07951
Control-1	Tropomyosin alpha-4 chain OS=Homo sapiens GN=TPM4 PE=1 SV=3	P67936	1	5	6	41	0.000501	0.508	MEIQEMQLK	0.997	37.7	26.9	0			575.286	1148.56	2	0.5724	1663170	P07951
Control-1	Tropomyosin alpha-4 chain OS=Homo sapiens GN=TPM4 PE=1 SV=3	P67936	1	5	6	41	0.000501	0.508	RIQLVEEELDR	0.988	25.4	26.9	23.4			467.255	1398.74	3	-1.592	976352	P09493,P06753,P07951
Control-1	Tropomyosin alpha-4 chain OS=Homo sapiens GN=TPM4 PE=1 SV=3	P67936	1	5	6	41	0.000501	0.508	RIQLVEEELDR	0.997	51.8	27	47.9			467.256	1398.75	3	-0.5415	997627	P09493,P06753,P07951
Control-1	Tropomyosin alpha-4 chain OS=Homo sapiens GN=TPM4 PE=1 SV=3	P67936	1	5	6	41	0.000501	0.508	RIQLVEEELDR	0.997	28.7	26.8	21.1			700.381	1398.75	2	0.2129	568637	P09493,P06753,P07951
Control-1	Tropomyosin alpha-4 chain OS=Homo sapiens GN=TPM4 PE=1 SV=3	P67936	1	5	6	41	0.000501	0.508	RIQLVEEELDR	0.997	39.6	27	38.4			467.256	1398.75	3	-1.056	1038400	P09493,P06753,P07951
Control-1	Tropomyosin alpha-4 chain OS=Homo sapiens GN=TPM4 PE=1 SV=3	P67936	1	5	6	41	0.000501	0.508	RIQLVEEELDRAQER	0.991	23.8	27.5	23.8			471.754	1882.99	4	0.7782	1757690	P09493,P06753,P07951
Control-1	Tropomyosin alpha-4 chain OS=Homo sapiens GN=TPM4 PE=1 SV=3	P67936	1	5	6	41	0.000501	0.508	YEEEIKLLSDK	0.997	26.8	27.4	22.7			456.242	1365.7	3	0.4844	1170470
Control-1	Tropomyosin alpha-4 chain OS=Homo sapiens GN=TPM4 PE=1 SV=3	P67936	1	5	6	41	0.000501	0.508	YEEEIKLLSDK	0.997	36.9	27.5	29			683.859	1365.7	2	-0.2648	894556
Control-1	Inter-alpha-trypsin inhibitor heavy chain H5 OS=Homo sapiens GN=ITIH5 PE=2 SV=2	Q86UX2	1	2	2	2	2.44e-05	0.018	TPLLSDIR	0.99	33.9	25	33.9			457.769	913.523	2	-0.1989	806041
Control-1	Inter-alpha-trypsin inhibitor heavy chain H5 OS=Homo sapiens GN=ITIH5 PE=2 SV=2	Q86UX2	1	2	2	2	2.44e-05	0.018	VYQGEITER	0.997	26.4	27.3	12.4			547.778	1093.54	2	1.698	562996
Control-1	3-hydroxyisobutyryl-CoA hydrolase, mitochondrial OS=Homo sapiens GN=HIBCH PE=1 SV=2	Q6NVY1	1	3	3	3	3.66e-05	0.0829	GHDFHEGVR	0.982	19.9	25	19.9			527.247	1052.48	2	0.7955	343268
Control-1	3-hydroxyisobutyryl-CoA hydrolase, mitochondrial OS=Homo sapiens GN=HIBCH PE=1 SV=2	Q6NVY1	1	3	3	3	3.66e-05	0.0829	LAMLEEDLLALK	0.997	58.6	26.8	56.5			679.885	1357.76	2	1.838	477862
Control-1	3-hydroxyisobutyryl-CoA hydrolase, mitochondrial OS=Homo sapiens GN=HIBCH PE=1 SV=2	Q6NVY1	1	3	3	3	3.66e-05	0.0829	LGYFLALTGFR	0.997	52.3	26.3	52.3			629.353	1256.69	2	-0.4786	412887
Control-1	Prelamin-A/C OS=Homo sapiens GN=LMNA PE=1 SV=1	P02545	1	29	39	42	0.000513	0.47	AQHEDQVEQYKK	0.997	34.7	26.2	31.3			751.865	1501.72	2	-0.7998	191627
Control-1	Prelamin-A/C OS=Homo sapiens GN=LMNA PE=1 SV=1	P02545	1	29	39	42	0.000513	0.47	AQHEDQVEQYKK	0.997	39.2	26.6	34.7			501.579	1501.72	3	0.08788	1476770
Control-1	Prelamin-A/C OS=Homo sapiens GN=LMNA PE=1 SV=1	P02545	1	29	39	42	0.000513	0.47	AQNTWGcGNSLR	0.997	35.4	25	35.4	c7: Carbamidomethyl (+57.02)		682.312	1362.61	2	-0.5187	1136420
Control-1	Prelamin-A/C OS=Homo sapiens GN=LMNA PE=1 SV=1	P02545	1	29	39	42	0.000513	0.47	DLEDSLAR	0.99	26.5	26.5	17.9			459.732	917.449	2	3.874	2604630
Control-1	Prelamin-A/C OS=Homo sapiens GN=LMNA PE=1 SV=1	P02545	1	29	39	42	0.000513	0.47	EAALSTALSEK	0.983	21.4	28.8	17.8			560.299	1118.58	2	0.5699	1913050
Control-1	Prelamin-A/C OS=Homo sapiens GN=LMNA PE=1 SV=1	P02545	1	29	39	42	0.000513	0.47	EGDLIAAQAR	0.997	61.6	25.5	41.1			522.278	1042.54	2	0.1131	2596440
Control-1	Prelamin-A/C OS=Homo sapiens GN=LMNA PE=1 SV=1	P02545	1	29	39	42	0.000513	0.47	IRIDSLSAQLSQLQK	0.997	35.7	25	15.1			850.49	1698.97	2	1.528	823479
Control-1	Prelamin-A/C OS=Homo sapiens GN=LMNA PE=1 SV=1	P02545	1	29	39	42	0.000513	0.47	IRIDSLSAQLSQLQK	0.997	37	25	27			567.328	1698.96	3	0.3365	1696870
Control-1	Prelamin-A/C OS=Homo sapiens GN=LMNA PE=1 SV=1	P02545	1	29	39	42	0.000513	0.47	ITESEEVVSR	0.997	47	27.9	44.6			574.794	1147.57	2	0.6774	2577520
Control-1	Prelamin-A/C OS=Homo sapiens GN=LMNA PE=1 SV=1	P02545	1	29	39	42	0.000513	0.47	KLLEGEEER	0.997	41.2	26.5	25			551.791	1101.57	2	-0.1287	1209700	P20700,Q03252
Control-1	Prelamin-A/C OS=Homo sapiens GN=LMNA PE=1 SV=1	P02545	1	29	39	42	0.000513	0.47	KQLQDEMLR	0.971	19.7	27.7	12.3			387.541	1159.6	3	-0.3429	1166200
Control-1	Prelamin-A/C OS=Homo sapiens GN=LMNA PE=1 SV=1	P02545	1	29	39	42	0.000513	0.47	KTLDSVAK	0.99	32.2	27.2	13.6			431.255	860.496	2	-0.6523	1440950
Control-1	Prelamin-A/C OS=Homo sapiens GN=LMNA PE=1 SV=1	P02545	1	29	39	42	0.000513	0.47	LADALQELR	0.997	52	25	41.1			514.791	1027.57	2	0.2509	1869420
Control-1	Prelamin-A/C OS=Homo sapiens GN=LMNA PE=1 SV=1	P02545	1	29	39	42	0.000513	0.47	LALDmEIHAYR	0.973	19.8	27.1	13.7		m5: Oxidation (+15.99)	449.896	1346.66	3	-0.3732	1507140
Control-1	Prelamin-A/C OS=Homo sapiens GN=LMNA PE=1 SV=1	P02545	1	29	39	42	0.000513	0.47	LALDMEIHAYR	0.997	27.6	27.9	25.1			444.564	1330.67	3	0.4521	1998750
Control-1	Prelamin-A/C OS=Homo sapiens GN=LMNA PE=1 SV=1	P02545	1	29	39	42	0.000513	0.47	LKDLEALLNSK	0.997	42.3	25.2	36.7			415.247	1242.72	3	-0.1672	975957
Control-1	Prelamin-A/C OS=Homo sapiens GN=LMNA PE=1 SV=1	P02545	1	29	39	42	0.000513	0.47	LKDLEALLNSK	0.997	34.7	25.2	20.1			622.366	1242.72	2	-0.1624	2868800
Control-1	Prelamin-A/C OS=Homo sapiens GN=LMNA PE=1 SV=1	P02545	1	29	39	42	0.000513	0.47	LLEGEEER	0.99	36.9	25	29.8			487.742	973.469	2	-2.875	733386	P20700,Q03252
Control-1	Prelamin-A/C OS=Homo sapiens GN=LMNA PE=1 SV=1	P02545	1	29	39	42	0.000513	0.47	LQEKEDLQELNDR	0.997	61.9	27.7	50.1			815.407	1628.8	2	-0.6638	1031370
Control-1	Prelamin-A/C OS=Homo sapiens GN=LMNA PE=1 SV=1	P02545	1	29	39	42	0.000513	0.47	LRDLEDSLAR	0.997	32.4	27.1	17.3			594.323	1186.63	2	1.177	1164030
Control-1	Prelamin-A/C OS=Homo sapiens GN=LMNA PE=1 SV=1	P02545	1	29	39	42	0.000513	0.47	LRDLEDSLAR	0.997	35.8	27.9	22.6			396.551	1186.63	3	0.2375	4806240
Control-1	Prelamin-A/C OS=Homo sapiens GN=LMNA PE=1 SV=1	P02545	1	29	39	42	0.000513	0.47	LSPSPTSQR	0.968	17.3	25	10.1			486.759	971.504	2	-0.1665	1463820
Control-1	Prelamin-A/C OS=Homo sapiens GN=LMNA PE=1 SV=1	P02545	1	29	39	42	0.000513	0.47	mQQQLDEYQELLDIK	0.992	81.3	27.6	72.5		m1: Oxidation (+15.99)	955.464	1908.91	2	0.06443	463462
Control-1	Prelamin-A/C OS=Homo sapiens GN=LMNA PE=1 SV=1	P02545	1	29	39	42	0.000513	0.47	MQQQLDEYQELLDIK	0.994	50.5	28	48.7			947.47	1892.93	2	3.695	979881
Control-1	Prelamin-A/C OS=Homo sapiens GN=LMNA PE=1 SV=1	P02545	1	29	39	42	0.000513	0.47	MQQQLDEYQELLDIK	0.997	67.1	27.9	64.2			631.981	1892.92	3	0.302	908936
Control-1	Prelamin-A/C OS=Homo sapiens GN=LMNA PE=1 SV=1	P02545	1	29	39	42	0.000513	0.47	NSNLVGAAHEELQQSR	0.976	19.4	27.9	16.5			584.959	1751.86	3	0.3492	1410040
Control-1	Prelamin-A/C OS=Homo sapiens GN=LMNA PE=1 SV=1	P02545	1	29	39	42	0.000513	0.47	NSNLVGAAHEELQQSR	0.997	45	28	39.6			876.937	1751.86	2	2.167	569168
Control-1	Prelamin-A/C OS=Homo sapiens GN=LMNA PE=1 SV=1	P02545	1	29	39	42	0.000513	0.47	NSNLVGAAHEELQQSR	0.997	41.6	28.1	41.6			584.96	1751.86	3	1.393	1960590
Control-1	Prelamin-A/C OS=Homo sapiens GN=LMNA PE=1 SV=1	P02545	1	29	39	42	0.000513	0.47	QLQDEMLR	0.99	29	26.1	22.1			516.761	1031.51	2	-0.1181	1323900
Control-1	Prelamin-A/C OS=Homo sapiens GN=LMNA PE=1 SV=1	P02545	1	29	39	42	0.000513	0.47	RKLESTESR	0.996	25.2	26.9	16.8			553.302	1104.59	2	0.0706	106680
Control-1	Prelamin-A/C OS=Homo sapiens GN=LMNA PE=1 SV=1	P02545	1	29	39	42	0.000513	0.47	SGAQASSTPLSPTR	0.997	69.1	27	47.3			680.347	1358.68	2	0.7046	1227540
Control-1	Prelamin-A/C OS=Homo sapiens GN=LMNA PE=1 SV=1	P02545	1	29	39	42	0.000513	0.47	SLETENAGLR	0.997	44.8	27.6	32.8			545.281	1088.55	2	0.5305	1593070
Control-1	Prelamin-A/C OS=Homo sapiens GN=LMNA PE=1 SV=1	P02545	1	29	39	42	0.000513	0.47	SNEDQSMGNWQIK	0.986	88.9	25	84.7			768.841	1535.67	2	-0.2355	1080910
Control-1	Prelamin-A/C OS=Homo sapiens GN=LMNA PE=1 SV=1	P02545	1	29	39	42	0.000513	0.47	SSFSQHAR	0.99	33.3	25	23.2			460.223	918.431	2	0.4329	312096
Control-1	Prelamin-A/C OS=Homo sapiens GN=LMNA PE=1 SV=1	P02545	1	29	39	42	0.000513	0.47	SVGGSGGGSFGDNLVTR	0.997	67	26.7	67			783.88	1565.75	2	0.9689	801238
Control-1	Prelamin-A/C OS=Homo sapiens GN=LMNA PE=1 SV=1	P02545	1	29	39	42	0.000513	0.47	TALINSTGEEVAmR	0.997	46.6	27.4	41		m13: Oxidation (+15.99)	754.375	1506.73	2	-0.1174	709769
Control-1	Prelamin-A/C OS=Homo sapiens GN=LMNA PE=1 SV=1	P02545	1	29	39	42	0.000513	0.47	TLEGELHDLR	0.997	43.9	26.8	34.8			591.81	1181.61	2	0.6748	1500620
Control-1	Prelamin-A/C OS=Homo sapiens GN=LMNA PE=1 SV=1	P02545	1	29	39	42	0.000513	0.47	TLEGELHDLR	0.997	42.1	27.4	36.2			394.875	1181.6	3	0.2385	1470120
Control-1	Prelamin-A/C OS=Homo sapiens GN=LMNA PE=1 SV=1	P02545	1	29	39	42	0.000513	0.47	TVLcGTcGQPADK	0.997	37.1	25	32.2	c4: Carbamidomethyl (+57.02), c7: Carbamidomethyl (+57.02)		703.826	1405.64	2	2.493	442984
Control-1	Prelamin-A/C OS=Homo sapiens GN=LMNA PE=1 SV=1	P02545	1	29	39	42	0.000513	0.47	VAVEEVDEEGK	0.995	63.7	25	56			602.292	1202.57	2	2.524	2284810
Control-1	Prelamin-A/C OS=Homo sapiens GN=LMNA PE=1 SV=1	P02545	1	29	39	42	0.000513	0.47	VAVEEVDEEGKFVR	0.997	53.3	28	48.8			803.409	1604.8	2	-0.9229	1072430
Control-1	Prelamin-A/C OS=Homo sapiens GN=LMNA PE=1 SV=1	P02545	1	29	39	42	0.000513	0.47	VAVEEVDEEGKFVR	0.997	35.4	28.1	24.4			535.942	1604.8	3	-0.2727	4392150
Control-1	Latent-transforming growth factor beta-binding protein 4 OS=Homo sapiens GN=LTBP4 PE=1 SV=2	Q8N2S1	1	2	2	2	2.44e-05	0.0166	AAEcLDVDEcHR	0.997	34.8	25	34.8	c4: Carbamidomethyl (+57.02), c10: Carbamidomethyl (+57.02)		492.206	1473.6	3	-0.7992	810812
Control-1	Latent-transforming growth factor beta-binding protein 4 OS=Homo sapiens GN=LTBP4 PE=1 SV=2	Q8N2S1	1	2	2	2	2.44e-05	0.0166	VSGPWEEADAEAVAR	0.997	59.1	26.3	59.1			793.876	1585.74	2	0.5408	769235
Control-1	Protein disulfide-isomerase A6 OS=Homo sapiens GN=PDIA6 PE=1 SV=1	Q15084	1	4	4	4	4.88e-05	0.123	GESPVDYDGGR	0.997	40	25	36.2			576.253	1150.49	2	1.023	1171510
Control-1	Protein disulfide-isomerase A6 OS=Homo sapiens GN=PDIA6 PE=1 SV=1	Q15084	1	4	4	4	4.88e-05	0.123	LAAVDATVNQVLASR	0.997	47.1	26.2	43.5			509.955	1526.84	3	1.081	611007
Control-1	Protein disulfide-isomerase A6 OS=Homo sapiens GN=PDIA6 PE=1 SV=1	Q15084	1	4	4	4	4.88e-05	0.123	NLEPEWAAAASEVK	0.994	36.3	27.1	30.2			757.882	1513.75	2	5.095	1847100
Control-1	Protein disulfide-isomerase A6 OS=Homo sapiens GN=PDIA6 PE=1 SV=1	Q15084	1	4	4	4	4.88e-05	0.123	TGEAIVDAALSALR	0.996	67.3	27.3	50.4			462.924	1385.75	3	-0.6619	273208
Control-1	THO complex subunit 4 OS=Homo sapiens GN=ALYREF PE=1 SV=3	Q86V81	1	2	2	2	2.44e-05	0.0817	NRPAPYSRPK	0.989	22.7	26.3	22.7			395.888	1184.64	3	0.06078	369105
Control-1	THO complex subunit 4 OS=Homo sapiens GN=ALYREF PE=1 SV=3	Q86V81	1	2	2	2	2.44e-05	0.0817	SLGTADVHFER	0.977	19.7	26.8	17.9			411.207	1230.6	3	-0.01457	1124870
Control-1	Keratin, type I cytoskeletal 14 OS=Homo sapiens GN=KRT14 PE=1 SV=4	P02533	0.89	0	0	6	7.32e-05	0.0869	LEQEIATYR	0.997	50.4	28	39			561.793	1121.57	2	0.08735	1705520	P08779,P08727,P13646,Q04695,P35900
Control-1	Keratin, type I cytoskeletal 14 OS=Homo sapiens GN=KRT14 PE=1 SV=4	P02533	0.89	0	0	6	7.32e-05	0.0869	MSVEADINGLR	0.996	72.2	27.3	59.2			602.803	1203.59	2	-0.1842	1408880	P08727
Control-1	Keratin, type I cytoskeletal 14 OS=Homo sapiens GN=KRT14 PE=1 SV=4	P02533	0.89	0	0	6	7.32e-05	0.0869	MSVEADINGLRR	0.971	20.1	28.3	11.5			454.239	1359.69	3	1.045	1678980	P08727
Control-1	Keratin, type I cytoskeletal 14 OS=Homo sapiens GN=KRT14 PE=1 SV=4	P02533	0.89	0	0	6	7.32e-05	0.0869	TRLEQEIATYR	0.997	37.3	27.4	27.3			460.581	1378.72	3	-0.3681	1293510	P08779,P13646,Q04695,P35900
Control-1	Keratin, type I cytoskeletal 14 OS=Homo sapiens GN=KRT14 PE=1 SV=4	P02533	0.89	0	0	6	7.32e-05	0.0869	VLDELTLAR	0.997	36.8	25	28.4			515.301	1028.59	2	0.7168	1053640	P08779,P08727,Q04695
Control-1	Keratin, type I cytoskeletal 14 OS=Homo sapiens GN=KRT14 PE=1 SV=4	P02533	0.89	0	0	6	7.32e-05	0.0869	VTMQNLNDR	0.997	39.3	26.7	31.8			545.769	1089.52	2	0.4567	1159900	P08779,P13645
Control-1	Eosinophil cationic protein OS=Homo sapiens GN=RNASE3 PE=1 SV=2	P12724	1	3	3	3	3.66e-05	0.269	AQWFAIQHISLNPPR	0.997	33.2	27.5	33.2			593.322	1776.94	3	1.295	826692
Control-1	Eosinophil cationic protein OS=Homo sapiens GN=RNASE3 PE=1 SV=2	P12724	1	3	3	3	3.66e-05	0.269	TTFANVVNVcGNQSIR	0.997	71.5	27.9	70.4	c10: Carbamidomethyl (+57.02)		890.444	1778.87	2	0.5128	671064
Control-1	Eosinophil cationic protein OS=Homo sapiens GN=RNASE3 PE=1 SV=2	P12724	1	3	3	3	3.66e-05	0.269	YPVVPVHLDTTI	0.997	44	25.7	43.8			677.375	1352.73	2	0.5895	1371400
Control-1	Laminin subunit beta-2 OS=Homo sapiens GN=LAMB2 PE=1 SV=2	P55268	1	28	31	33	0.000403	0.206	AAQLDGLEAR	0.997	49	26.6	41.8			522.278	1042.54	2	1.052	1876820
Control-1	Laminin subunit beta-2 OS=Homo sapiens GN=LAMB2 PE=1 SV=2	P55268	1	28	31	33	0.000403	0.206	ALAEGGSILSR	0.997	46.6	27.6	40.1			537.301	1072.59	2	0.5384	3101710
Control-1	Laminin subunit beta-2 OS=Homo sapiens GN=LAMB2 PE=1 SV=2	P55268	1	28	31	33	0.000403	0.206	AMDYDLLLR	0.997	29.1	26.9	24.1			555.288	1108.56	2	1.711	1004970
Control-1	Laminin subunit beta-2 OS=Homo sapiens GN=LAMB2 PE=1 SV=2	P55268	1	28	31	33	0.000403	0.206	AQGVLAAQAR	0.997	28.4	25	17.6			492.783	983.551	2	-0.652	753332
Control-1	Laminin subunit beta-2 OS=Homo sapiens GN=LAMB2 PE=1 SV=2	P55268	1	28	31	33	0.000403	0.206	DGFFGLSISDR	0.997	42.5	25.2	42.5			607.297	1212.58	2	1.053	1150860
Control-1	Laminin subunit beta-2 OS=Homo sapiens GN=LAMB2 PE=1 SV=2	P55268	1	28	31	33	0.000403	0.206	DGFFGLSISDR	0.997	31.7	25.5	31.7			607.296	1212.58	2	0.1467	893894
Control-1	Laminin subunit beta-2 OS=Homo sapiens GN=LAMB2 PE=1 SV=2	P55268	1	28	31	33	0.000403	0.206	DGFFGLSISDR	0.997	35.3	25.4	35.3			607.297	1212.58	2	0.6576	404381
Control-1	Laminin subunit beta-2 OS=Homo sapiens GN=LAMB2 PE=1 SV=2	P55268	1	28	31	33	0.000403	0.206	DLRDPAVcR	0.976	21.5	26.2	14.2	c8: Carbamidomethyl (+57.02)		551.278	1100.54	2	1.718	626909
Control-1	Laminin subunit beta-2 OS=Homo sapiens GN=LAMB2 PE=1 SV=2	P55268	1	28	31	33	0.000403	0.206	EIGEATEHLTQLEADLTDVQDENFNANHALSGLER	0.997	57.8	26.4	51.5			970.711	3878.82	4	-1.035	1405600
Control-1	Laminin subunit beta-2 OS=Homo sapiens GN=LAMB2 PE=1 SV=2	P55268	1	28	31	33	0.000403	0.206	GIDTPQcHR	0.997	27.5	25	22.5	c7: Carbamidomethyl (+57.02)		542.254	1082.49	2	0.3071	392604
Control-1	Laminin subunit beta-2 OS=Homo sapiens GN=LAMB2 PE=1 SV=2	P55268	1	28	31	33	0.000403	0.206	GLNcEQcQDFYR	0.997	45	25	45	c4: Carbamidomethyl (+57.02), c7: Carbamidomethyl (+57.02)		795.328	1588.64	2	0.8351	1653730
Control-1	Laminin subunit beta-2 OS=Homo sapiens GN=LAMB2 PE=1 SV=2	P55268	1	28	31	33	0.000403	0.206	GPLGDQYQTVK	0.997	37.6	28.1	32.4			603.312	1204.61	2	-0.3832	1239020
Control-1	Laminin subunit beta-2 OS=Homo sapiens GN=LAMB2 PE=1 SV=2	P55268	1	28	31	33	0.000403	0.206	GPTcNEFTGQcHcR	0.99	67.5	25	67.5	c4: Carbamidomethyl (+57.02), c11: Carbamidomethyl (+57.02), c13: Carbamidomethyl (+57.02)		862.343	1722.67	2	2.67	164676
Control-1	Laminin subunit beta-2 OS=Homo sapiens GN=LAMB2 PE=1 SV=2	P55268	1	28	31	33	0.000403	0.206	GPTcNEFTGQcHcR	0.997	43	25	43	c4: Carbamidomethyl (+57.02), c11: Carbamidomethyl (+57.02), c13: Carbamidomethyl (+57.02)		575.228	1722.66	3	-1.696	448979
Control-1	Laminin subunit beta-2 OS=Homo sapiens GN=LAMB2 PE=1 SV=2	P55268	1	28	31	33	0.000403	0.206	GQVEQANQELQELIQSVK	0.997	58.2	27.9	58.2			1021.03	2040.05	2	2.067	371858
Control-1	Laminin subunit beta-2 OS=Homo sapiens GN=LAMB2 PE=1 SV=2	P55268	1	28	31	33	0.000403	0.206	GQVEQANQELQELIQSVK	0.997	56.9	28.2	52.5			681.024	2040.05	3	-0.05778	638883
Control-1	Laminin subunit beta-2 OS=Homo sapiens GN=LAMB2 PE=1 SV=2	P55268	1	28	31	33	0.000403	0.206	GQVLDVVER	0.997	37.8	25	30.3			507.782	1013.55	2	-0.8101	1998920
Control-1	Laminin subunit beta-2 OS=Homo sapiens GN=LAMB2 PE=1 SV=2	P55268	1	28	31	33	0.000403	0.206	HFATScHQDEYSQQIVcHcR	0.997	27.5	25	27.5	c6: Carbamidomethyl (+57.02), c17: Carbamidomethyl (+57.02), c19: Carbamidomethyl (+57.02)		641.523	2562.06	4	0.9559	799035
Control-1	Laminin subunit beta-2 OS=Homo sapiens GN=LAMB2 PE=1 SV=2	P55268	1	28	31	33	0.000403	0.206	HSNFLGAYDSIR	0.997	29.5	27.2	29.5			460.562	1378.66	3	0.4364	1185070
Control-1	Laminin subunit beta-2 OS=Homo sapiens GN=LAMB2 PE=1 SV=2	P55268	1	28	31	33	0.000403	0.206	IQNVVTSFAPQR	0.997	48.6	27.3	48.6			680.373	1358.73	2	0.1015	1111850
Control-1	Laminin subunit beta-2 OS=Homo sapiens GN=LAMB2 PE=1 SV=2	P55268	1	28	31	33	0.000403	0.206	LGIVQGIVGAR	0.997	45.6	25	44			541.838	1081.66	2	-0.09416	784322
Control-1	Laminin subunit beta-2 OS=Homo sapiens GN=LAMB2 PE=1 SV=2	P55268	1	28	31	33	0.000403	0.206	LHTLGDNLLDPR	0.996	26	27.3	17.2			455.249	1362.72	3	-0.6658	1127390
Control-1	Laminin subunit beta-2 OS=Homo sapiens GN=LAMB2 PE=1 SV=2	P55268	1	28	31	33	0.000403	0.206	LPYGGQcRPcPcPEGPGSQR	0.997	27.9	25	27.9	c7: Carbamidomethyl (+57.02), c10: Carbamidomethyl (+57.02), c12: Carbamidomethyl (+57.02)		758.339	2272	3	0.6758	1004460
Control-1	Laminin subunit beta-2 OS=Homo sapiens GN=LAMB2 PE=1 SV=2	P55268	1	28	31	33	0.000403	0.206	LQEGQTLEFLVASVPK	0.997	45.6	26.1	44.2			879.988	1757.96	2	2.751	928501
Control-1	Laminin subunit beta-2 OS=Homo sapiens GN=LAMB2 PE=1 SV=2	P55268	1	28	31	33	0.000403	0.206	LQEGQTLEFLVASVPK	0.997	44.9	26.2	36.2			586.994	1757.96	3	1.656	422460
Control-1	Laminin subunit beta-2 OS=Homo sapiens GN=LAMB2 PE=1 SV=2	P55268	1	28	31	33	0.000403	0.206	QLDALLEALK	0.997	41.7	25	30.3			557.329	1112.64	2	-0.325	955134
Control-1	Laminin subunit beta-2 OS=Homo sapiens GN=LAMB2 PE=1 SV=2	P55268	1	28	31	33	0.000403	0.206	QLDQHLDLLK	0.981	20.4	26.8	13.6			408.231	1221.67	3	0.05076	1007980
Control-1	Laminin subunit beta-2 OS=Homo sapiens GN=LAMB2 PE=1 SV=2	P55268	1	28	31	33	0.000403	0.206	RAEQLLQDAR	0.984	23.1	26.8	7.44			400.554	1198.64	3	-0.6235	1143290
Control-1	Laminin subunit beta-2 OS=Homo sapiens GN=LAMB2 PE=1 SV=2	P55268	1	28	31	33	0.000403	0.206	ScDcDPmGSQDGGR	0.983	19.8	25	2.54	c2: Carbamidomethyl (+57.02), c4: Carbamidomethyl (+57.02)	m7: Oxidation (+15.99)	779.272	1556.53	2	0.1236	93184.9
Control-1	Laminin subunit beta-2 OS=Homo sapiens GN=LAMB2 PE=1 SV=2	P55268	1	28	31	33	0.000403	0.206	SLADVDAILAR	0.996	63	25.8	58.9			572.321	1142.63	2	-1.226	1932380
Control-1	Laminin subunit beta-2 OS=Homo sapiens GN=LAMB2 PE=1 SV=2	P55268	1	28	31	33	0.000403	0.206	VLVLEMFSGGDAAALER	0.997	62.1	28.4	62.1			889.462	1776.91	2	0.4151	841621
Control-1	Laminin subunit beta-2 OS=Homo sapiens GN=LAMB2 PE=1 SV=2	P55268	1	28	31	33	0.000403	0.206	VVQDLAAR	0.99	39.3	25	26.8			436.254	870.494	2	1.65	2241890
Control-1	Laminin subunit beta-2 OS=Homo sapiens GN=LAMB2 PE=1 SV=2	P55268	1	28	31	33	0.000403	0.206	YFSYDcGADFPGVPLAPPR	0.997	61.4	26.4	61.4	c6: Carbamidomethyl (+57.02)		1064.99	2127.97	2	0.8609	568107
Control-1	Poly(rC)-binding protein 3 OS=Homo sapiens GN=PCBP3 PE=2 SV=2	P57721	0.6	0	0	4	4.88e-05	0.121	ESTGAQVQVAGDMLPNSTER	0.996	31.4	27	31.4			1045.5	2088.98	2	3.358	659757	Q15366,Q15365
Control-1	Poly(rC)-binding protein 3 OS=Homo sapiens GN=PCBP3 PE=2 SV=2	P57721	0.6	0	0	4	4.88e-05	0.121	ESTGAQVQVAGDMLPNSTER	0.997	33.2	26.8	27.9			697.331	2088.97	3	-1.291	799557	Q15366,Q15365
Control-1	Poly(rC)-binding protein 3 OS=Homo sapiens GN=PCBP3 PE=2 SV=2	P57721	0.6	0	0	4	4.88e-05	0.121	INISEGNcPER	0.997	43	25	38.2	c8: Carbamidomethyl (+57.02)		644.801	1287.59	2	-0.1608	1041900	Q15366,Q15365
Control-1	Poly(rC)-binding protein 3 OS=Homo sapiens GN=PCBP3 PE=2 SV=2	P57721	0.6	0	0	4	4.88e-05	0.121	LVVPASQcGSLIGK	0.997	37.7	26.6	35	c8: Carbamidomethyl (+57.02)		714.897	1427.78	2	-0.495	1326470	Q15366
Control-1	Plastin-1 OS=Homo sapiens GN=PLS1 PE=1 SV=2	Q14651	1	2	2	3	3.66e-05	0.062	AYFHLLNQIAPK	0.997	36.9	26.7	33.4			472.266	1413.78	3	-0.9033	837467	P13797
Control-1	Plastin-1 OS=Homo sapiens GN=PLS1 PE=1 SV=2	Q14651	1	2	2	3	3.66e-05	0.062	IYALPDDLVEVKPK	0.997	45.6	25	38.2			533.972	1598.89	3	0.7013	1162230
Control-1	Plastin-1 OS=Homo sapiens GN=PLS1 PE=1 SV=2	Q14651	1	2	2	3	3.66e-05	0.062	MINLSEPDTIDER	0.997	34	26.3	26.4			766.867	1531.72	2	0.338	794304
Control-1	Neuronal growth regulator 1 OS=Homo sapiens GN=NEGR1 PE=1 SV=3	Q7Z3B1	1	2	2	2	2.44e-05	0.116	DYSLQIQNVDVTDDGPYTcSVQTQHTPR	0.997	34.3	25.6	34.3	c19: Carbamidomethyl (+57.02)		1079.83	3236.47	3	-0.1184	385046
Control-1	Neuronal growth regulator 1 OS=Homo sapiens GN=NEGR1 PE=1 SV=3	Q7Z3B1	1	2	2	2	2.44e-05	0.116	VVVNFAPTIQEIK	0.997	36.8	25	36.8			729.423	1456.83	2	1.425	1111210
Control-1	Glutathione S-transferase P OS=Homo sapiens GN=GSTP1 PE=1 SV=2	P09211	1	7	10	14	0.000171	0.471	ALPGQLKPFETLLSQNQGGK	0.988	23.5	25.5	23.5			709.391	2125.15	3	-0.9726	3590820
Control-1	Glutathione S-transferase P OS=Homo sapiens GN=GSTP1 PE=1 SV=2	P09211	1	7	10	14	0.000171	0.471	ALPGQLKPFETLLSQNQGGK	0.997	26.3	25	26.3			1063.59	2125.16	2	1.532	466359
Control-1	Glutathione S-transferase P OS=Homo sapiens GN=GSTP1 PE=1 SV=2	P09211	1	7	10	14	0.000171	0.471	DQQEAALVDMVNDGVEDLR	0.994	58.8	26.2	58.8			1058.99	2115.97	2	-2.127	345130
Control-1	Glutathione S-transferase P OS=Homo sapiens GN=GSTP1 PE=1 SV=2	P09211	1	7	10	14	0.000171	0.471	DQQEAALVDMVNDGVEDLR	0.997	41	26.4	38.5			706.332	2115.97	3	-0.4005	987461
Control-1	Glutathione S-transferase P OS=Homo sapiens GN=GSTP1 PE=1 SV=2	P09211	1	7	10	14	0.000171	0.471	DQQEAALVDMVNDGVEDLR	0.997	33.2	26.6	30.9			706.333	2115.98	3	0.889	992956
Control-1	Glutathione S-transferase P OS=Homo sapiens GN=GSTP1 PE=1 SV=2	P09211	1	7	10	14	0.000171	0.471	EEVVTVETWQEGSLK	0.997	37.6	27.7	37.6			867.434	1732.85	2	0.541	743401
Control-1	Glutathione S-transferase P OS=Homo sapiens GN=GSTP1 PE=1 SV=2	P09211	1	7	10	14	0.000171	0.471	FQDGDLTLYQSNTILR	0.979	81.7	27.7	71.5			942.481	1882.95	2	2.441	975111
Control-1	Glutathione S-transferase P OS=Homo sapiens GN=GSTP1 PE=1 SV=2	P09211	1	7	10	14	0.000171	0.471	FQDGDLTLYQSNTILR	0.997	52	27.6	52			942.478	1882.94	2	-0.6061	710059
Control-1	Glutathione S-transferase P OS=Homo sapiens GN=GSTP1 PE=1 SV=2	P09211	1	7	10	14	0.000171	0.471	FQDGDLTLYQSNTILR	0.997	53.1	27.6	50.8			628.655	1882.94	3	0.5478	1063330
Control-1	Glutathione S-transferase P OS=Homo sapiens GN=GSTP1 PE=1 SV=2	P09211	1	7	10	14	0.000171	0.471	FQDGDLTLYQSNTILR	0.997	34.5	27.7	28.2			942.48	1882.94	2	1.145	1035770
Control-1	Glutathione S-transferase P OS=Homo sapiens GN=GSTP1 PE=1 SV=2	P09211	1	7	10	14	0.000171	0.471	FQDGDLTLYQSNTILR	0.997	43.7	27.8	43.7			628.655	1882.94	3	0.2612	1037160
Control-1	Glutathione S-transferase P OS=Homo sapiens GN=GSTP1 PE=1 SV=2	P09211	1	7	10	14	0.000171	0.471	MLLADQGQSWK	0.997	50.4	27.2	46.9			638.822	1275.63	2	0.3118	1219130
Control-1	Glutathione S-transferase P OS=Homo sapiens GN=GSTP1 PE=1 SV=2	P09211	1	7	10	14	0.000171	0.471	PPYTVVYFPVR	0.997	47	25.7	44			669.366	1336.72	2	-0.2556	1739410
Control-1	Glutathione S-transferase P OS=Homo sapiens GN=GSTP1 PE=1 SV=2	P09211	1	7	10	14	0.000171	0.471	TLGLYGKDQQEAALVDMVNDGVEDLR	0.994	44.6	28.3	40.4			950.476	2848.4	3	4.549	481199
Control-1	Alpha-crystallin B chain OS=Homo sapiens GN=CRYAB PE=1 SV=2	P02511	1	7	9	9	0.00011	0.491	EEKPAVTAAPK	0.995	75.8	26.1	62			570.817	1139.62	2	0.08597	1988000
Control-1	Alpha-crystallin B chain OS=Homo sapiens GN=CRYAB PE=1 SV=2	P02511	1	7	9	9	0.00011	0.491	EEKPAVTAAPK	0.997	31.8	26.2	23.7			380.88	1139.62	3	-0.1034	2061690
Control-1	Alpha-crystallin B chain OS=Homo sapiens GN=CRYAB PE=1 SV=2	P02511	1	7	9	9	0.00011	0.491	FSVNLDVK	0.99	41.9	26.7	36.3			461.256	920.497	2	0.2366	1116580
Control-1	Alpha-crystallin B chain OS=Homo sapiens GN=CRYAB PE=1 SV=2	P02511	1	7	9	9	0.00011	0.491	HFSPEELK	0.99	23.8	25	9.93			493.751	985.488	2	0.7482	2124080
Control-1	Alpha-crystallin B chain OS=Homo sapiens GN=CRYAB PE=1 SV=2	P02511	1	7	9	9	0.00011	0.491	QDEHGFISR	0.997	34.7	25	23.8			544.76	1087.51	2	0.8618	1195850
Control-1	Alpha-crystallin B chain OS=Homo sapiens GN=CRYAB PE=1 SV=2	P02511	1	7	9	9	0.00011	0.491	RPFFPFHSPSR	0.965	18.6	27.9	18.6			458.908	1373.7	3	1.02	1390790
Control-1	Alpha-crystallin B chain OS=Homo sapiens GN=CRYAB PE=1 SV=2	P02511	1	7	9	9	0.00011	0.491	VLGDVIEVHGK	0.997	57.9	26.1	51.3			389.224	1164.65	3	-0.1012	2219820
Control-1	Alpha-crystallin B chain OS=Homo sapiens GN=CRYAB PE=1 SV=2	P02511	1	7	9	9	0.00011	0.491	VLGDVIEVHGK	0.997	55.3	25.3	50.6			583.333	1164.65	2	0.3243	1637520
Control-1	Alpha-crystallin B chain OS=Homo sapiens GN=CRYAB PE=1 SV=2	P02511	1	7	9	9	0.00011	0.491	YRIPADVDPLTITSSLSSDGVLTVNGPR	0.997	53.8	26.1	53.8			981.854	2942.54	3	1.981	739706
Control-1	Sorcin OS=Homo sapiens GN=SRI PE=1 SV=1	P30626	1	3	3	3	3.66e-05	0.172	ITFDDYIAccVK	0.997	52.6	25	51.9	c9: Carbamidomethyl (+57.02), c10: Carbamidomethyl (+57.02)		752.844	1503.67	2	-0.54	1088630
Control-1	Sorcin OS=Homo sapiens GN=SRI PE=1 SV=1	P30626	1	3	3	3	3.66e-05	0.172	LSPQAVNSIAK	0.997	33.3	25.2	27.8			564.325	1126.64	2	1.045	2923870
Control-1	Sorcin OS=Homo sapiens GN=SRI PE=1 SV=1	P30626	1	3	3	3	3.66e-05	0.172	SGTVDPQELQK	0.997	42.1	26.9	36.7			601.308	1200.6	2	1.413	1121720
Control-1	Polypyrimidine tract-binding protein 1 OS=Homo sapiens GN=PTBP1 PE=1 SV=1	P26599	1	2	2	3	3.66e-05	0.0829	KLPIDVTEGEVISLGLPFGK	0.995	28.6	25	27.9			704.739	2111.2	3	3.722	1744590
Control-1	Polypyrimidine tract-binding protein 1 OS=Homo sapiens GN=PTBP1 PE=1 SV=1	P26599	1	2	2	3	3.66e-05	0.0829	LSLDGQNIYNAccTLR	0.997	35.4	26.7	32.9	c12: Carbamidomethyl (+57.02), c13: Carbamidomethyl (+57.02)		949.45	1896.89	2	1.427	436183
Control-1	Polypyrimidine tract-binding protein 1 OS=Homo sapiens GN=PTBP1 PE=1 SV=1	P26599	1	2	2	3	3.66e-05	0.0829	VTNLLMLK	0.99	47	25.8	0			466.286	930.557	2	-0.5388	951979	O95758
Control-1	Vimentin OS=Homo sapiens GN=VIM PE=1 SV=4	P08670	1	27	37	49	0.000598	0.751	DGQVINETSQHHDDLE	0.97	23.1	25	23.1			612.937	1835.79	3	-1.877	1917030
Control-1	Vimentin OS=Homo sapiens GN=VIM PE=1 SV=4	P08670	1	27	37	49	0.000598	0.751	DGQVINETSQHHDDLE	0.997	28	25	28			918.906	1835.8	2	2.188	395870
Control-1	Vimentin OS=Homo sapiens GN=VIM PE=1 SV=4	P08670	1	27	37	49	0.000598	0.751	DGQVINETSQHHDDLE	0.997	49.8	25	49.8			918.903	1835.79	2	-0.9375	649386
Control-1	Vimentin OS=Homo sapiens GN=VIM PE=1 SV=4	P08670	1	27	37	49	0.000598	0.751	DGQVINETSQHHDDLE	0.997	30.1	25	30.1			612.939	1835.79	3	1.014	1685280
Control-1	Vimentin OS=Homo sapiens GN=VIM PE=1 SV=4	P08670	1	27	37	49	0.000598	0.751	DNLAEDImR	0.972	17.3	25	14.5		m8: Oxidation (+15.99)	546.754	1091.49	2	0.5886	1865570
Control-1	Vimentin OS=Homo sapiens GN=VIM PE=1 SV=4	P08670	1	27	37	49	0.000598	0.751	DNLAEDIMR	0.987	21.9	25	10.4			538.756	1075.5	2	1.094	1127210
Control-1	Vimentin OS=Homo sapiens GN=VIM PE=1 SV=4	P08670	1	27	37	49	0.000598	0.751	EEAENTLQSFR	0.997	61.4	25.6	55.7			662.312	1322.61	2	-0.1375	1132230
Control-1	Vimentin OS=Homo sapiens GN=VIM PE=1 SV=4	P08670	1	27	37	49	0.000598	0.751	EKLQEEmLQR	0.997	32.5	27.5	25.6		m7: Oxidation (+15.99)	660.336	1318.66	2	1.912	360920
Control-1	Vimentin OS=Homo sapiens GN=VIM PE=1 SV=4	P08670	1	27	37	49	0.000598	0.751	EKLQEEMLQR	0.997	42.7	27.5	34.6			652.339	1302.66	2	1.87	1178880
Control-1	Vimentin OS=Homo sapiens GN=VIM PE=1 SV=4	P08670	1	27	37	49	0.000598	0.751	EKLQEEMLQR	0.997	29	27.6	14.4			435.227	1302.66	3	-0.6658	1436500
Control-1	Vimentin OS=Homo sapiens GN=VIM PE=1 SV=4	P08670	1	27	37	49	0.000598	0.751	EMEENFAVEAANYQDTIGR	0.98	82.7	25	82.7			729.662	2185.96	3	1.912	2038520
Control-1	Vimentin OS=Homo sapiens GN=VIM PE=1 SV=4	P08670	1	27	37	49	0.000598	0.751	EmEENFAVEAANYQDTIGR	0.995	75.9	25	75.9		m2: Oxidation (+15.99)	1101.98	2201.95	2	-0.162	606221
Control-1	Vimentin OS=Homo sapiens GN=VIM PE=1 SV=4	P08670	1	27	37	49	0.000598	0.751	EmEENFAVEAANYQDTIGR	0.997	51.3	25	51.3		m2: Oxidation (+15.99)	734.992	2201.95	3	0.1848	1120810
Control-1	Vimentin OS=Homo sapiens GN=VIM PE=1 SV=4	P08670	1	27	37	49	0.000598	0.751	ETNLDSLPLVDTHSK	0.997	42.9	27.7	37.5			834.927	1667.84	2	1.473	1194410
Control-1	Vimentin OS=Homo sapiens GN=VIM PE=1 SV=4	P08670	1	27	37	49	0.000598	0.751	ETNLDSLPLVDTHSKR	0.997	30.7	28	21.6			456.992	1823.94	4	0.3102	1584310
Control-1	Vimentin OS=Homo sapiens GN=VIM PE=1 SV=4	P08670	1	27	37	49	0.000598	0.751	EYQDLLNVK	0.997	31.5	27.3	26.2			561.295	1120.58	2	-0.4832	2471830	P07197,P17661,Q16352,P12036
Control-1	Vimentin OS=Homo sapiens GN=VIM PE=1 SV=4	P08670	1	27	37	49	0.000598	0.751	FADLSEAANR	0.997	44.2	27.1	38.7			547.268	1092.52	2	0.4737	2593300
Control-1	Vimentin OS=Homo sapiens GN=VIM PE=1 SV=4	P08670	1	27	37	49	0.000598	0.751	ILLAELEQLK	0.997	25.2	25	14.1			585.361	1168.71	2	0.4429	726779
Control-1	Vimentin OS=Homo sapiens GN=VIM PE=1 SV=4	P08670	1	27	37	49	0.000598	0.751	ILLAELEQLK	0.997	39.5	25	29.7			585.361	1168.71	2	0.1351	3054050
Control-1	Vimentin OS=Homo sapiens GN=VIM PE=1 SV=4	P08670	1	27	37	49	0.000598	0.751	ISLPLPNFSSLNLR	0.997	60.8	25	60.8			785.952	1569.89	2	0.5844	5986680
Control-1	Vimentin OS=Homo sapiens GN=VIM PE=1 SV=4	P08670	1	27	37	49	0.000598	0.751	KLLEGEESR	0.997	36.6	27.5	13.4			530.785	1059.56	2	-0.1527	603799	P05787,P08729,P41219,P17661
Control-1	Vimentin OS=Homo sapiens GN=VIM PE=1 SV=4	P08670	1	27	37	49	0.000598	0.751	KVESLQEEIAFLK	0.997	62.3	25.4	56			767.431	1532.85	2	1.929	1519790
Control-1	Vimentin OS=Homo sapiens GN=VIM PE=1 SV=4	P08670	1	27	37	49	0.000598	0.751	KVESLQEEIAFLK	0.997	40	25.5	35			511.956	1532.85	3	1.005	765349
Control-1	Vimentin OS=Homo sapiens GN=VIM PE=1 SV=4	P08670	1	27	37	49	0.000598	0.751	KVESLQEEIAFLKK	0.997	64.1	25	62.2			554.654	1660.94	3	0.09149	4930700
Control-1	Vimentin OS=Homo sapiens GN=VIM PE=1 SV=4	P08670	1	27	37	49	0.000598	0.751	LGDLYEEEmR	0.996	24.6	25	24.6		m9: Oxidation (+15.99)	635.785	1269.56	2	1.167	807381
Control-1	Vimentin OS=Homo sapiens GN=VIM PE=1 SV=4	P08670	1	27	37	49	0.000598	0.751	LHEEEIQELQAQIQEQHVQIDVDVSKPDLTAALR	0.997	48.5	25.8	48.5			981.511	3922.02	4	2.296	727625
Control-1	Vimentin OS=Homo sapiens GN=VIM PE=1 SV=4	P08670	1	27	37	49	0.000598	0.751	LLEGEESR	0.99	31.1	26.2	16.1			466.737	931.46	2	-1.461	3913640	P05787,P08729,P41219,P17661,Q9NSB2
Control-1	Vimentin OS=Homo sapiens GN=VIM PE=1 SV=4	P08670	1	27	37	49	0.000598	0.751	LLQDSVDFSLADAINTEFKNTR	0.996	41.8	28.1	41.8			833.093	2496.26	3	3.164	816956
Control-1	Vimentin OS=Homo sapiens GN=VIM PE=1 SV=4	P08670	1	27	37	49	0.000598	0.751	LQDEIQNMKEEMAR	0.997	26.8	26.2	26.4			578.944	1733.81	3	0.6353	4601500
Control-1	Vimentin OS=Homo sapiens GN=VIM PE=1 SV=4	P08670	1	27	37	49	0.000598	0.751	LQDEIQNMKEEMAR	0.997	47.2	25.8	40.1			867.911	1733.81	2	-0.2317	886043
Control-1	Vimentin OS=Homo sapiens GN=VIM PE=1 SV=4	P08670	1	27	37	49	0.000598	0.751	LQEEmLQR	0.99	28.2	27.3	19.5		m5: Oxidation (+15.99)	531.765	1061.52	2	-1.277	650554
Control-1	Vimentin OS=Homo sapiens GN=VIM PE=1 SV=4	P08670	1	27	37	49	0.000598	0.751	LQEEMLQR	0.99	39.5	27.2	30.9			523.769	1045.52	2	-0.2121	3739500
Control-1	Vimentin OS=Homo sapiens GN=VIM PE=1 SV=4	P08670	1	27	37	49	0.000598	0.751	MALDIEIATYR	0.997	65.6	27.3	43.5			648.337	1294.66	2	-0.001499	972270	P41219
Control-1	Vimentin OS=Homo sapiens GN=VIM PE=1 SV=4	P08670	1	27	37	49	0.000598	0.751	NLQEAEEWYK	0.997	38	25.3	30			655.306	1308.6	2	-1.071	981766	P41219
Control-1	Vimentin OS=Homo sapiens GN=VIM PE=1 SV=4	P08670	1	27	37	49	0.000598	0.751	QDVDNASLAR	0.991	78	25.9	58.2			544.771	1087.53	2	1.56	2730270
Control-1	Vimentin OS=Homo sapiens GN=VIM PE=1 SV=4	P08670	1	27	37	49	0.000598	0.751	QQYESVAAK	0.997	44	26.3	26.6			512.259	1022.5	2	-0.3536	1096280
Control-1	Vimentin OS=Homo sapiens GN=VIM PE=1 SV=4	P08670	1	27	37	49	0.000598	0.751	QVDQLTNDK	0.997	53.1	25.8	40.8			530.767	1059.52	2	-0.2281	1667050
Control-1	Vimentin OS=Homo sapiens GN=VIM PE=1 SV=4	P08670	1	27	37	49	0.000598	0.751	QVQSLTcEVDALK	0.994	76.3	28.1	69.1	c7: Carbamidomethyl (+57.02)		745.879	1489.74	2	-0.5683	1825230
Control-1	Vimentin OS=Homo sapiens GN=VIM PE=1 SV=4	P08670	1	27	37	49	0.000598	0.751	SLYASSPGGVYATR	0.997	41.1	27.4	41.1			476.908	1427.7	3	-0.9155	1559660
Control-1	Vimentin OS=Homo sapiens GN=VIM PE=1 SV=4	P08670	1	27	37	49	0.000598	0.751	SLYASSPGGVYATR	0.997	35.3	27.4	33.6			714.86	1427.71	2	1.007	1120790
Control-1	Vimentin OS=Homo sapiens GN=VIM PE=1 SV=4	P08670	1	27	37	49	0.000598	0.751	SRLGDLYEEEMR	0.986	21.5	25.9	15.3			499.905	1496.69	3	-0.2323	1148730
Control-1	Vimentin OS=Homo sapiens GN=VIM PE=1 SV=4	P08670	1	27	37	49	0.000598	0.751	SYVTTSTR	0.99	38.5	25	31.1			457.732	913.45	2	-0.3302	9682760
Control-1	Vimentin OS=Homo sapiens GN=VIM PE=1 SV=4	P08670	1	27	37	49	0.000598	0.751	TNEKVELQELNDR	0.997	70.6	27.6	51.2			794.403	1586.79	2	0.2129	995467	P17661
Control-1	Vimentin OS=Homo sapiens GN=VIM PE=1 SV=4	P08670	1	27	37	49	0.000598	0.751	TNEKVELQELNDR	0.997	53.8	27.6	47.4			529.938	1586.79	3	0.5429	2724080	P17661
Control-1	Vimentin OS=Homo sapiens GN=VIM PE=1 SV=4	P08670	1	27	37	49	0.000598	0.751	TVETRDGQVINETSQHHDDLE	0.997	36.1	25.4	36.1			808.376	2422.11	3	2.3	561541
Control-1	Vimentin OS=Homo sapiens GN=VIM PE=1 SV=4	P08670	1	27	37	49	0.000598	0.751	TYSLGSALRPSTSR	0.967	18.1	28	12			499.267	1494.78	3	0.6699	4636200
Control-1	Vimentin OS=Homo sapiens GN=VIM PE=1 SV=4	P08670	1	27	37	49	0.000598	0.751	VELQELNDR	0.997	52.5	26.6	37.8			558.289	1114.56	2	0.4465	5648520	P17661
Control-1	Vimentin OS=Homo sapiens GN=VIM PE=1 SV=4	P08670	1	27	37	49	0.000598	0.751	VELQELNDR	0.997	37.3	25.9	21.7			558.288	1114.56	2	-0.3065	899466	P17661
Control-1	Vimentin OS=Homo sapiens GN=VIM PE=1 SV=4	P08670	1	27	37	49	0.000598	0.751	VEVERDNLAEDIMR	0.995	25	27.9	20.6			563.614	1687.82	3	0.4157	2609600
Control-1	Glycogenin-1 OS=Homo sapiens GN=GYG1 PE=1 SV=4	P46976	1	2	2	2	2.44e-05	0.0686	GALVLGSSLK	0.997	31.6	25	12.2			472.792	943.57	2	-0.02323	1416800
Control-1	Glycogenin-1 OS=Homo sapiens GN=GYG1 PE=1 SV=4	P46976	1	2	2	2	2.44e-05	0.0686	LVVLATPQVSDSMR	0.997	34.4	26.7	34.4			758.414	1514.81	2	0.6057	1392990
Control-1	Erythrocyte band 7 integral membrane protein OS=Homo sapiens GN=STOM PE=1 SV=3	P27105	1	3	3	3	3.66e-05	0.149	EASMVITESPAALQLR	0.997	48.5	28.1	47.1			858.454	1714.89	2	0.4768	992078
Control-1	Erythrocyte band 7 integral membrane protein OS=Homo sapiens GN=STOM PE=1 SV=3	P27105	1	3	3	3	3.66e-05	0.149	LLAQTTLR	0.976	18.3	25	12.9			458.285	914.555	2	0.4129	2303750
Control-1	Erythrocyte band 7 integral membrane protein OS=Homo sapiens GN=STOM PE=1 SV=3	P27105	1	3	3	3	3.66e-05	0.149	VQNATLAVANITNADSATR	0.996	73.9	28	66.4			965.503	1928.99	2	0.05081	407900
Control-1	2-oxoglutarate dehydrogenase-like, mitochondrial OS=Homo sapiens GN=OGDHL PE=1 SV=3	Q9ULD0	0.588	0	0	2	2.44e-05	0.0178	LSGQDVER	0.99	24.9	25.2	11.6			452.231	902.448	2	2.189	844378	Q02218
Control-1	2-oxoglutarate dehydrogenase-like, mitochondrial OS=Homo sapiens GN=OGDHL PE=1 SV=3	Q9ULD0	0.588	0	0	2	2.44e-05	0.0178	SSPYPTDVAR	0.993	24.1	27.3	15.6			546.77	1091.53	2	0.8769	657150	Q02218
Control-1	Ras-related protein Rab-23 OS=Homo sapiens GN=RAB23 PE=1 SV=1	Q9ULC3	1	2	2	2	2.44e-05	0.105	TIGVDFLER	0.977	21.8	26.9	21.8			525.285	1048.55	2	-0.7641	1121550
Control-1	Ras-related protein Rab-23 OS=Homo sapiens GN=RAB23 PE=1 SV=1	Q9ULC3	1	2	2	2	2.44e-05	0.105	VVAEVGDIPTVLVQNK	0.988	21.1	25	21.1			840.981	1679.95	2	0.677	1313470
Control-1	Integrin alpha-5 OS=Homo sapiens GN=ITGA5 PE=1 SV=2	P08648	1	6	6	6	7.32e-05	0.0896	AGASLWGGLR	0.997	31	27.4	23.1			494.272	986.53	2	0.07904	1465410
Control-1	Integrin alpha-5 OS=Homo sapiens GN=ITGA5 PE=1 SV=2	P08648	1	6	6	6	7.32e-05	0.0896	EHQPFSLQcEAVYK	0.984	21	26.4	17.7	c9: Carbamidomethyl (+57.02)		579.275	1734.8	3	0.4072	1697950
Control-1	Integrin alpha-5 OS=Homo sapiens GN=ITGA5 PE=1 SV=2	P08648	1	6	6	6	7.32e-05	0.0896	LLESSLSSSEGEEPVEYK	0.988	90.3	27.1	90.3			991.976	1981.94	2	0.3621	762162
Control-1	Integrin alpha-5 OS=Homo sapiens GN=ITGA5 PE=1 SV=2	P08648	1	6	6	6	7.32e-05	0.0896	SSASSGPQILK	0.997	27.2	28.1	13.8			537.794	1073.57	2	0.8916	1158620
Control-1	Integrin alpha-5 OS=Homo sapiens GN=ITGA5 PE=1 SV=2	P08648	1	6	6	6	7.32e-05	0.0896	VTAPPEAEYSGLVR	0.997	47.5	28.2	43			496.927	1487.76	3	-1.08	896527
Control-1	Integrin alpha-5 OS=Homo sapiens GN=ITGA5 PE=1 SV=2	P08648	1	6	6	6	7.32e-05	0.0896	VYVYLQHPAGIEPTPTLTLTGHDEFGR	0.997	50.6	27.3	47.2			1004.52	3010.52	3	1.435	572677
Control-1	UBX domain-containing protein 1 OS=Homo sapiens GN=UBXN1 PE=1 SV=2	Q04323	1	2	2	2	2.44e-05	0.0707	EKAEELAAR	0.968	17.8	26.1	5.94			508.772	1015.53	2	-0.1003	420990
Control-1	UBX domain-containing protein 1 OS=Homo sapiens GN=UBXN1 PE=1 SV=2	Q04323	1	2	2	2	2.44e-05	0.0707	LPDGTSLTQTFR	0.997	43.9	27.9	35			668.35	1334.68	2	1.047	949370
Control-1	Ras GTPase-activating-like protein IQGAP1 OS=Homo sapiens GN=IQGAP1 PE=1 SV=1	P46940	1	15	15	15	0.000183	0.138	ALESGDVNTVWK	0.997	40.4	27.5	32			659.836	1317.66	2	0.2867	1053210
Control-1	Ras GTPase-activating-like protein IQGAP1 OS=Homo sapiens GN=IQGAP1 PE=1 SV=1	P46940	1	15	15	15	0.000183	0.138	ALQSPALGLR	0.997	31.3	25	28.4			513.309	1024.6	2	-0.0604	2230250
Control-1	Ras GTPase-activating-like protein IQGAP1 OS=Homo sapiens GN=IQGAP1 PE=1 SV=1	P46940	1	15	15	15	0.000183	0.138	EEIQSSISGVTAAYNR	0.995	77.7	27.7	77.7			862.926	1723.84	2	0.254	1069510
Control-1	Ras GTPase-activating-like protein IQGAP1 OS=Homo sapiens GN=IQGAP1 PE=1 SV=1	P46940	1	15	15	15	0.000183	0.138	EQLWLANEGLITR	0.997	31.2	27.3	19.9			771.918	1541.82	2	0.6599	1765530
Control-1	Ras GTPase-activating-like protein IQGAP1 OS=Homo sapiens GN=IQGAP1 PE=1 SV=1	P46940	1	15	15	15	0.000183	0.138	ERDVYEELLTQAEIQGNINK	0.993	29.7	28.2	24.3			788.071	2361.19	3	4.247	1147400
Control-1	Ras GTPase-activating-like protein IQGAP1 OS=Homo sapiens GN=IQGAP1 PE=1 SV=1	P46940	1	15	15	15	0.000183	0.138	FDVPGDENAEMDAR	0.997	38.4	25	37.6			783.331	1564.65	2	0.2415	847695
Control-1	Ras GTPase-activating-like protein IQGAP1 OS=Homo sapiens GN=IQGAP1 PE=1 SV=1	P46940	1	15	15	15	0.000183	0.138	IFYPETTDIYDR	0.997	64.4	25.9	64.4			766.867	1531.72	2	-0.6928	1058170
Control-1	Ras GTPase-activating-like protein IQGAP1 OS=Homo sapiens GN=IQGAP1 PE=1 SV=1	P46940	1	15	15	15	0.000183	0.138	ILAIGLINEALDEGDAQK	0.977	19.8	26.6	19.8			942.011	1882.01	2	0.9974	1112490
Control-1	Ras GTPase-activating-like protein IQGAP1 OS=Homo sapiens GN=IQGAP1 PE=1 SV=1	P46940	1	15	15	15	0.000183	0.138	ITLQDVVSHSK	0.997	31.2	26.1	27.4			409.563	1225.67	3	-0.2347	602313
Control-1	Ras GTPase-activating-like protein IQGAP1 OS=Homo sapiens GN=IQGAP1 PE=1 SV=1	P46940	1	15	15	15	0.000183	0.138	LEGVLAEVAQHYQDTLIR	0.997	37.4	27.1	36.4			685.701	2054.08	3	1.334	1264260
Control-1	Ras GTPase-activating-like protein IQGAP1 OS=Homo sapiens GN=IQGAP1 PE=1 SV=1	P46940	1	15	15	15	0.000183	0.138	LPYDVTPEQALAHEEVK	0.997	27.3	28.3	27.3			646.999	1937.97	3	0.3414	1648650
Control-1	Ras GTPase-activating-like protein IQGAP1 OS=Homo sapiens GN=IQGAP1 PE=1 SV=1	P46940	1	15	15	15	0.000183	0.138	MREEVITLIR	0.974	19.6	26.5	9.31			420.576	1258.71	3	-0.2921	961830
Control-1	Ras GTPase-activating-like protein IQGAP1 OS=Homo sapiens GN=IQGAP1 PE=1 SV=1	P46940	1	15	15	15	0.000183	0.138	QLSSSVTGLTNIEEENcQR	0.997	32.3	26.5	32.3	c17: Carbamidomethyl (+57.02)		1083.01	2164	2	-0.9271	269587
Control-1	Ras GTPase-activating-like protein IQGAP1 OS=Homo sapiens GN=IQGAP1 PE=1 SV=1	P46940	1	15	15	15	0.000183	0.138	SPDVGLYGVIPEcGETYHSDLAEAK	0.997	30.6	26.2	30.6	c13: Carbamidomethyl (+57.02)		903.089	2706.25	3	-1.157	839854
Control-1	Ras GTPase-activating-like protein IQGAP1 OS=Homo sapiens GN=IQGAP1 PE=1 SV=1	P46940	1	15	15	15	0.000183	0.138	TLINAEDPPMVVVR	0.997	30.5	26.7	25.1			777.422	1552.83	2	1.26	1168160
Control-1	Aspartyl aminopeptidase OS=Homo sapiens GN=DNPEP PE=1 SV=1	Q9ULA0	1	2	2	2	2.44e-05	0.0484	SPSPFHAVAEcR	0.982	22.6	25	20.2	c11: Carbamidomethyl (+57.02)		453.216	1356.63	3	1.964	1064270
Control-1	Aspartyl aminopeptidase OS=Homo sapiens GN=DNPEP PE=1 SV=1	Q9ULA0	1	2	2	2	2.44e-05	0.0484	VKVPLQDLMVR	0.997	33.8	25	33.8			433.26	1296.76	3	-1.586	311600
Control-1	Heat shock-related 70 kDa protein 2 OS=Homo sapiens GN=HSPA2 PE=1 SV=1	P54652	1	8	8	19	0.000232	0.304	ARFEELNADLFR	0.997	41.7	27.9	35.8			494.256	1479.75	3	0.04191	2510890	P11142
Control-1	Heat shock-related 70 kDa protein 2 OS=Homo sapiens GN=HSPA2 PE=1 SV=1	P54652	1	8	8	19	0.000232	0.304	cQEVINWLDR	0.97	17.4	26	15.4	c1: Carbamidomethyl (+57.02)		666.822	1331.63	2	0.3848	1070120
Control-1	Heat shock-related 70 kDa protein 2 OS=Homo sapiens GN=HSPA2 PE=1 SV=1	P54652	1	8	8	19	0.000232	0.304	DAGTITGLNVLR	0.997	63.7	27.5	57.5			615.346	1228.68	2	0.2424	1589180
Control-1	Heat shock-related 70 kDa protein 2 OS=Homo sapiens GN=HSPA2 PE=1 SV=1	P54652	1	8	8	19	0.000232	0.304	FEELNADLFR	0.997	54.2	26.7	51.8			627.311	1252.61	2	-1.182	1307230	P11142
Control-1	Heat shock-related 70 kDa protein 2 OS=Homo sapiens GN=HSPA2 PE=1 SV=1	P54652	1	8	8	19	0.000232	0.304	GPAIGIDLGTTYScVGVFQHGK	0.997	52.3	28.2	52.3	c14: Carbamidomethyl (+57.02)		759.715	2276.12	3	-0.9544	1089740
Control-1	Heat shock-related 70 kDa protein 2 OS=Homo sapiens GN=HSPA2 PE=1 SV=1	P54652	1	8	8	19	0.000232	0.304	GQIQEIVLVGGSTR	0.997	55.2	26.4	48			728.911	1455.81	2	1.77	986418
Control-1	Heat shock-related 70 kDa protein 2 OS=Homo sapiens GN=HSPA2 PE=1 SV=1	P54652	1	8	8	19	0.000232	0.304	GTLEPVEK	0.99	27.3	25	20.5			436.741	871.467	2	1.442	1063210	P34931
Control-1	Heat shock-related 70 kDa protein 2 OS=Homo sapiens GN=HSPA2 PE=1 SV=1	P54652	1	8	8	19	0.000232	0.304	IINEPTAAAIAYGLDK	0.997	55.4	27.5	55.4			830.452	1658.89	2	0.9507	2067470	P11021,P11142,P34931
Control-1	Heat shock-related 70 kDa protein 2 OS=Homo sapiens GN=HSPA2 PE=1 SV=1	P54652	1	8	8	19	0.000232	0.304	IINEPTAAAIAYGLDKK	0.997	50.8	25.1	50			596.669	1786.99	3	1.036	3292390	P11142
Control-1	Heat shock-related 70 kDa protein 2 OS=Homo sapiens GN=HSPA2 PE=1 SV=1	P54652	1	8	8	19	0.000232	0.304	ITITNDKGR	0.997	27.7	26.7	11.1			509.288	1016.56	2	0.1946	471712	P11142,P0DMV8,P0DMV9,P17066,P34931
Control-1	Heat shock-related 70 kDa protein 2 OS=Homo sapiens GN=HSPA2 PE=1 SV=1	P54652	1	8	8	19	0.000232	0.304	LLQDFFNGK	0.997	30.4	26.5	23.4			541.287	1080.56	2	-0.3901	624421	P11142,P17066
Control-1	Heat shock-related 70 kDa protein 2 OS=Homo sapiens GN=HSPA2 PE=1 SV=1	P54652	1	8	8	19	0.000232	0.304	LSKDDIDR	0.99	37.4	26.6	31.8			481.251	960.487	2	-0.418	1359990
Control-1	Heat shock-related 70 kDa protein 2 OS=Homo sapiens GN=HSPA2 PE=1 SV=1	P54652	1	8	8	19	0.000232	0.304	MVSHLAEEFK	0.989	22.2	26.6	22.1			397.534	1189.58	3	0.3797	962644
Control-1	Heat shock-related 70 kDa protein 2 OS=Homo sapiens GN=HSPA2 PE=1 SV=1	P54652	1	8	8	19	0.000232	0.304	NQMAEKDEYEHK	0.997	53.3	25	47.7			761.336	1520.66	2	0.5902	97688.6
Control-1	Heat shock-related 70 kDa protein 2 OS=Homo sapiens GN=HSPA2 PE=1 SV=1	P54652	1	8	8	19	0.000232	0.304	STAGDTHLGGEDFDNR	0.997	49.6	25	49.6			846.366	1690.72	2	-0.5568	1277120	P11142
Control-1	Heat shock-related 70 kDa protein 2 OS=Homo sapiens GN=HSPA2 PE=1 SV=1	P54652	1	8	8	19	0.000232	0.304	TTPSYVAFTDTER	0.997	54.3	25.8	54.3			744.355	1486.7	2	1.061	1142470	P11142,P0DMV8,P0DMV9,P17066,P48741,P34931
Control-1	Heat shock-related 70 kDa protein 2 OS=Homo sapiens GN=HSPA2 PE=1 SV=1	P54652	1	8	8	19	0.000232	0.304	VEIIANDQGNR	0.997	45.3	26.7	0			614.818	1227.62	2	-0.1318	1056410	P11021,P11142,P0DMV8,P0DMV9,P17066,P48741,P34931
Control-1	Heat shock-related 70 kDa protein 2 OS=Homo sapiens GN=HSPA2 PE=1 SV=1	P54652	1	8	8	19	0.000232	0.304	VEIIANDQGNR	0.997	46	26.7	0			614.818	1227.62	2	0.3565	1044370	P11021,P11142,P0DMV8,P0DMV9,P17066,P48741,P34931
Control-1	Heat shock-related 70 kDa protein 2 OS=Homo sapiens GN=HSPA2 PE=1 SV=1	P54652	1	8	8	19	0.000232	0.304	YKSEDEANRDR	0.997	26.7	25	26.7			691.818	1381.62	2	0.01306	95442.7
Control-1	Complement factor H OS=Homo sapiens GN=CFH PE=1 SV=4	P08603	1	2	2	2	2.44e-05	0.0179	LSYTcEGGFR	0.997	37.4	25	37.4	c5: Carbamidomethyl (+57.02)		595.269	1188.52	2	0.2966	1199280
Control-1	Complement factor H OS=Homo sapiens GN=CFH PE=1 SV=4	P08603	1	2	2	2	2.44e-05	0.0179	SSNLIILEEHLK	0.989	21.5	25	21.5			465.933	1394.78	3	0.503	807054
Control-1	HLA class II histocompatibility antigen, DR alpha chain OS=Homo sapiens GN=HLA-DRA PE=1 SV=1	P01903	0.999	1	1	2	2.44e-05	0.114	FHYLPFLPSTEDVYDcR	0.997	35.9	25.4	35.9	c16: Carbamidomethyl (+57.02)		720.333	2157.98	3	-2.498	763654
Control-1	HLA class II histocompatibility antigen, DR alpha chain OS=Homo sapiens GN=HLA-DRA PE=1 SV=1	P01903	0.999	1	1	2	2.44e-05	0.114	VEHWGLDEPLLK	0.997	32.7	27.8	25			479.258	1434.75	3	0.06412	836351
Control-1	Putative beta-actin-like protein 3 OS=Homo sapiens GN=POTEKP PE=5 SV=1	Q9BYX7	1	2	2	32	0.000391	0.192	EITALAPSIMk	0.993	25.7	27.6	0		k11: Oxidation (+15.99)	595.328	1188.64	2	-0.9557	1298000
Control-1	Putative beta-actin-like protein 3 OS=Homo sapiens GN=POTEKP PE=5 SV=1	Q9BYX7	1	2	2	32	0.000391	0.192	EITALAPSImKIK	0.997	32.5	25	1.5		m10: Oxidation (+15.99)	715.918	1429.82	2	-0.1237	4268680
Control-1	Putative beta-actin-like protein 3 OS=Homo sapiens GN=POTEKP PE=5 SV=1	Q9BYX7	1	2	2	32	0.000391	0.192	IWHHTFYNELR	0.972	18.5	26.8	18.5			505.921	1514.74	3	-0.00524	1088990	P63261,A5A3E0,P60709,P68133,P68032,Q6S8J3,P0CG39,P0CG38
Control-1	Putative beta-actin-like protein 3 OS=Homo sapiens GN=POTEKP PE=5 SV=1	Q9BYX7	1	2	2	32	0.000391	0.192	IWHHTFYNELR	0.985	21.6	27.1	12.2			379.693	1514.74	4	0.4922	1030000	P63261,A5A3E0,P60709,P68133,P68032,Q6S8J3,P0CG39,P0CG38
Control-1	Putative beta-actin-like protein 3 OS=Homo sapiens GN=POTEKP PE=5 SV=1	Q9BYX7	1	2	2	32	0.000391	0.192	IWHHTFYNELR	0.996	25.5	26.9	21.4			505.921	1514.74	3	-0.4803	5032000	P63261,A5A3E0,P60709,P68133,P68032,Q6S8J3,P0CG39,P0CG38
Control-1	Putative beta-actin-like protein 3 OS=Homo sapiens GN=POTEKP PE=5 SV=1	Q9BYX7	1	2	2	32	0.000391	0.192	IWHHTFYNELR	0.997	30.3	26.8	30.3			505.921	1514.74	3	0.2521	2946690	P63261,A5A3E0,P60709,P68133,P68032,Q6S8J3,P0CG39,P0CG38
Control-1	Putative beta-actin-like protein 3 OS=Homo sapiens GN=POTEKP PE=5 SV=1	Q9BYX7	1	2	2	32	0.000391	0.192	IWHHTFYNELR	0.997	43.3	26.8	43.3			505.921	1514.74	3	0.1927	10223200	P63261,A5A3E0,P60709,P68133,P68032,Q6S8J3,P0CG39,P0CG38
Control-1	Putative beta-actin-like protein 3 OS=Homo sapiens GN=POTEKP PE=5 SV=1	Q9BYX7	1	2	2	32	0.000391	0.192	IWHHTFYNELR	0.997	34.6	26.8	34.6			758.378	1514.74	2	0.355	964865	P63261,A5A3E0,P60709,P68133,P68032,Q6S8J3,P0CG39,P0CG38
Control-1	Putative beta-actin-like protein 3 OS=Homo sapiens GN=POTEKP PE=5 SV=1	Q9BYX7	1	2	2	32	0.000391	0.192	IWHHTFYNELR	0.997	38.7	27.3	38.7			758.38	1514.75	2	2.532	1312670	P63261,A5A3E0,P60709,P68133,P68032,Q6S8J3,P0CG39,P0CG38
Control-1	Putative beta-actin-like protein 3 OS=Homo sapiens GN=POTEKP PE=5 SV=1	Q9BYX7	1	2	2	32	0.000391	0.192	QEYDESGPSIVHR	0.997	56.5	25.2	21			758.856	1515.7	2	1.001	941735	P63261,A5A3E0,P60709,Q6S8J3,P0CG39,P0CG38
Control-1	Putative beta-actin-like protein 3 OS=Homo sapiens GN=POTEKP PE=5 SV=1	Q9BYX7	1	2	2	32	0.000391	0.192	QEYDESGPSIVHR	0.997	37.3	25.5	13.1			506.239	1515.7	3	0.2585	1016460	P63261,A5A3E0,P60709,Q6S8J3,P0CG39,P0CG38
Control-1	Putative beta-actin-like protein 3 OS=Homo sapiens GN=POTEKP PE=5 SV=1	Q9BYX7	1	2	2	32	0.000391	0.192	QEYDESGPSIVHRK	0.997	35.8	27.5	17.3			548.938	1643.79	3	0.4512	627736	P63261,A5A3E0,P60709,Q6S8J3,P0CG39,P0CG38
Control-1	Putative beta-actin-like protein 3 OS=Homo sapiens GN=POTEKP PE=5 SV=1	Q9BYX7	1	2	2	32	0.000391	0.192	SYELPDGQVITIGNER	0.979	20.2	27.9	19.2			895.95	1789.89	2	0.1999	1721610	P63267,Q562R1,P63261,A5A3E0,P60709,P68133,P62736,P68032,Q6S8J3
Control-1	Putative beta-actin-like protein 3 OS=Homo sapiens GN=POTEKP PE=5 SV=1	Q9BYX7	1	2	2	32	0.000391	0.192	SYELPDGQVITIGNER	0.99	23.7	28.2	22.1			597.636	1789.89	3	0.7103	808555	P63267,Q562R1,P63261,A5A3E0,P60709,P68133,P62736,P68032,Q6S8J3
Control-1	Putative beta-actin-like protein 3 OS=Homo sapiens GN=POTEKP PE=5 SV=1	Q9BYX7	1	2	2	32	0.000391	0.192	SYELPDGQVITIGNER	0.991	25.6	28.1	23			597.637	1789.89	3	1.933	2384640	P63267,Q562R1,P63261,A5A3E0,P60709,P68133,P62736,P68032,Q6S8J3
Control-1	Putative beta-actin-like protein 3 OS=Homo sapiens GN=POTEKP PE=5 SV=1	Q9BYX7	1	2	2	32	0.000391	0.192	SYELPDGQVITIGNER	0.993	81.2	28.2	72.4			895.951	1789.89	2	0.8812	247589000	P63267,Q562R1,P63261,A5A3E0,P60709,P68133,P62736,P68032,Q6S8J3
Control-1	Putative beta-actin-like protein 3 OS=Homo sapiens GN=POTEKP PE=5 SV=1	Q9BYX7	1	2	2	32	0.000391	0.192	SYELPDGQVITIGNER	0.997	66.3	28.2	64.6			597.636	1789.89	3	0.8108	19645900	P63267,Q562R1,P63261,A5A3E0,P60709,P68133,P62736,P68032,Q6S8J3
Control-1	Putative beta-actin-like protein 3 OS=Homo sapiens GN=POTEKP PE=5 SV=1	Q9BYX7	1	2	2	32	0.000391	0.192	SYELPDGQVITIGNER	0.997	34.2	28.1	34.2			597.637	1789.89	3	1.933	1102170	P63267,Q562R1,P63261,A5A3E0,P60709,P68133,P62736,P68032,Q6S8J3
Control-1	Putative beta-actin-like protein 3 OS=Homo sapiens GN=POTEKP PE=5 SV=1	Q9BYX7	1	2	2	32	0.000391	0.192	SYELPDGQVITIGNER	0.997	64.9	28.2	56.8			895.95	1789.89	2	0.5461	7344860	P63267,Q562R1,P63261,A5A3E0,P60709,P68133,P62736,P68032,Q6S8J3
Control-1	Putative beta-actin-like protein 3 OS=Homo sapiens GN=POTEKP PE=5 SV=1	Q9BYX7	1	2	2	32	0.000391	0.192	SYELPDGQVITIGNER	0.997	53.6	28.2	47.6			895.95	1789.89	2	0.8142	1164900	P63267,Q562R1,P63261,A5A3E0,P60709,P68133,P62736,P68032,Q6S8J3
Control-1	Putative beta-actin-like protein 3 OS=Homo sapiens GN=POTEKP PE=5 SV=1	Q9BYX7	1	2	2	32	0.000391	0.192	SYELPDGQVITIGNER	0.997	55.5	28.2	52.8			895.95	1789.89	2	0.6131	1186600	P63267,Q562R1,P63261,A5A3E0,P60709,P68133,P62736,P68032,Q6S8J3
Control-1	Putative beta-actin-like protein 3 OS=Homo sapiens GN=POTEKP PE=5 SV=1	Q9BYX7	1	2	2	32	0.000391	0.192	SYELPDGQVITIGNER	0.997	30.8	28.2	27.8			597.636	1789.89	3	1.213	1332010	P63267,Q562R1,P63261,A5A3E0,P60709,P68133,P62736,P68032,Q6S8J3
Control-1	Putative beta-actin-like protein 3 OS=Homo sapiens GN=POTEKP PE=5 SV=1	Q9BYX7	1	2	2	32	0.000391	0.192	SYELPDGQVITIGNER	0.997	47	28.2	47			895.951	1789.89	2	1.149	660244	P63267,Q562R1,P63261,A5A3E0,P60709,P68133,P62736,P68032,Q6S8J3
Control-1	Putative beta-actin-like protein 3 OS=Homo sapiens GN=POTEKP PE=5 SV=1	Q9BYX7	1	2	2	32	0.000391	0.192	SYELPDGQVITIGNER	0.997	48.7	27.9	37.9			597.636	1789.88	3	-0.01002	3941480	P63267,Q562R1,P63261,A5A3E0,P60709,P68133,P62736,P68032,Q6S8J3
Control-1	Putative beta-actin-like protein 3 OS=Homo sapiens GN=POTEKP PE=5 SV=1	Q9BYX7	1	2	2	32	0.000391	0.192	SYELPDGQVITIGNER	0.997	49.2	28.2	48.3			597.636	1789.89	3	0.392	1792120	P63267,Q562R1,P63261,A5A3E0,P60709,P68133,P62736,P68032,Q6S8J3
Control-1	Putative beta-actin-like protein 3 OS=Homo sapiens GN=POTEKP PE=5 SV=1	Q9BYX7	1	2	2	32	0.000391	0.192	SYELPDGQVITIGNER	0.997	30.8	27.9	30.8			895.95	1789.89	2	0.1999	550620	P63267,Q562R1,P63261,A5A3E0,P60709,P68133,P62736,P68032,Q6S8J3
Control-1	Putative beta-actin-like protein 3 OS=Homo sapiens GN=POTEKP PE=5 SV=1	Q9BYX7	1	2	2	32	0.000391	0.192	SYELPDGQVITIGNER	0.997	41.6	28.1	34.9			895.95	1789.88	2	-0.06809	3269370	P63267,Q562R1,P63261,A5A3E0,P60709,P68133,P62736,P68032,Q6S8J3
Control-1	Putative beta-actin-like protein 3 OS=Homo sapiens GN=POTEKP PE=5 SV=1	Q9BYX7	1	2	2	32	0.000391	0.192	SYELPDGQVITIGNER	0.997	37.1	28.1	32.7			895.952	1789.89	2	2.043	1662240	P63267,Q562R1,P63261,A5A3E0,P60709,P68133,P62736,P68032,Q6S8J3
Control-1	Putative beta-actin-like protein 3 OS=Homo sapiens GN=POTEKP PE=5 SV=1	Q9BYX7	1	2	2	32	0.000391	0.192	VAPEEHpILLTEAPLNPK	0.983	19.9	25.8	2.29		p7: Oxidation (+15.99)	662.03	1983.07	3	0.3211	2806260	Q6S8J3,P0CG39,P0CG38
Control-1	Putative beta-actin-like protein 3 OS=Homo sapiens GN=POTEKP PE=5 SV=1	Q9BYX7	1	2	2	32	0.000391	0.192	VAPEEHpILLTEAPLNPK	0.985	22.1	25.9	10.7		p7: Oxidation (+15.99)	992.543	1983.07	2	1.282	689537	Q6S8J3,P0CG39,P0CG38
Control-1	Putative beta-actin-like protein 3 OS=Homo sapiens GN=POTEKP PE=5 SV=1	Q9BYX7	1	2	2	32	0.000391	0.192	VAPEEHpILLTEAPLNPK	0.994	24.2	25.8	6.57		p7: Oxidation (+15.99)	992.541	1983.07	2	-0.3815	412134	Q6S8J3,P0CG39,P0CG38
Control-1	Putative beta-actin-like protein 3 OS=Homo sapiens GN=POTEKP PE=5 SV=1	Q9BYX7	1	2	2	32	0.000391	0.192	VApEEHPILLTEAPLNPK	0.997	26.3	25.6	2.83		p3: Oxidation (+15.99)	992.542	1983.07	2	1.1	493340	Q6S8J3,P0CG39,P0CG38
Control-1	Alpha-actinin-3 OS=Homo sapiens GN=ACTN3 PE=1 SV=2	Q08043	0.999	1	1	11	0.000134	0.0954	AGTQIENIEEDFR	0.997	59.3	26.5	53.1			761.362	1520.71	2	-0.4481	1452400	P35609,P12814
Control-1	Alpha-actinin-3 OS=Homo sapiens GN=ACTN3 PE=1 SV=2	Q08043	0.999	1	1	11	0.000134	0.0954	ALDFIASK	0.99	40	25.9	30.5			432.745	863.475	2	0.09029	910054	O43707,P12814
Control-1	Alpha-actinin-3 OS=Homo sapiens GN=ACTN3 PE=1 SV=2	Q08043	0.999	1	1	11	0.000134	0.0954	cQLEINFNTLQTK	0.997	42.8	28	37.8	c1: Carbamidomethyl (+57.02)		804.908	1607.8	2	1.674	1622120	O43707,P35609,P12814
Control-1	Alpha-actinin-3 OS=Homo sapiens GN=ACTN3 PE=1 SV=2	Q08043	0.999	1	1	11	0.000134	0.0954	EGLLLWcQR	0.997	39.4	27.8	29.1	c7: Carbamidomethyl (+57.02)		587.806	1173.6	2	0.113	2818750	O43707,P35609,P12814
Control-1	Alpha-actinin-3 OS=Homo sapiens GN=ACTN3 PE=1 SV=2	Q08043	0.999	1	1	11	0.000134	0.0954	FAIQDISVEETSAK	0.996	46.8	27.7	46.8			769.393	1536.77	2	2.73	1149410	O43707,P35609,P12814
Control-1	Alpha-actinin-3 OS=Homo sapiens GN=ACTN3 PE=1 SV=2	Q08043	0.999	1	1	11	0.000134	0.0954	IQEKcQLEINFNTLQTK	0.985	22.3	28.3	15.6	c5: Carbamidomethyl (+57.02)		703.033	2106.08	3	0.1361	1119710
Control-1	Alpha-actinin-3 OS=Homo sapiens GN=ACTN3 PE=1 SV=2	Q08043	0.999	1	1	11	0.000134	0.0954	KAGTQIENIEEDFR	0.997	35.3	27.8	35.3			550.61	1648.81	3	0.8135	1715040	P35609,P12814
Control-1	Alpha-actinin-3 OS=Homo sapiens GN=ACTN3 PE=1 SV=2	Q08043	0.999	1	1	11	0.000134	0.0954	KTFTAWcNSHLR	0.997	38.8	27.8	35.8	c7: Carbamidomethyl (+57.02)		507.586	1519.74	3	-0.2454	1427260	O43707,P35609,P12814
Control-1	Alpha-actinin-3 OS=Homo sapiens GN=ACTN3 PE=1 SV=2	Q08043	0.999	1	1	11	0.000134	0.0954	LmLLLEVISGER	0.997	51.3	25.9	43.7		m2: Oxidation (+15.99)	694.896	1387.78	2	1.63	758138	O43707,P35609,P12814
Control-1	Alpha-actinin-3 OS=Homo sapiens GN=ACTN3 PE=1 SV=2	Q08043	0.999	1	1	11	0.000134	0.0954	TFTAWcNSHLR	0.988	21.6	25.5	21.2	c6: Carbamidomethyl (+57.02)		464.888	1391.64	3	0.5147	3211790	O43707,P35609,P12814
Control-1	Alpha-actinin-3 OS=Homo sapiens GN=ACTN3 PE=1 SV=2	Q08043	0.999	1	1	11	0.000134	0.0954	TFTAWcNSHLR	0.997	31.6	25.3	31.6	c6: Carbamidomethyl (+57.02)		696.829	1391.64	2	2.048	1181910	O43707,P35609,P12814
Control-1	Thymosin beta-4 OS=Homo sapiens GN=TMSB4X PE=1 SV=2	P62328	1	3	6	6	7.32e-05	0.455	KTETQEKNPLPSK	0.99	23.2	27.2	19.7			500.607	1498.8	3	0.4681	428132
Control-1	Thymosin beta-4 OS=Homo sapiens GN=TMSB4X PE=1 SV=2	P62328	1	3	6	6	7.32e-05	0.455	KTETQEKNPLPSK	0.997	37.7	27	24.9			750.409	1498.8	2	2.639	106765
Control-1	Thymosin beta-4 OS=Homo sapiens GN=TMSB4X PE=1 SV=2	P62328	1	3	6	6	7.32e-05	0.455	NPLPSKETIEQEK	0.997	29.9	26.9	25.8			756.899	1511.78	2	-0.5301	544977
Control-1	Thymosin beta-4 OS=Homo sapiens GN=TMSB4X PE=1 SV=2	P62328	1	3	6	6	7.32e-05	0.455	NPLPSKETIEQEK	0.997	46.8	27.2	41.4			504.935	1511.78	3	-0.01186	1012130
Control-1	Thymosin beta-4 OS=Homo sapiens GN=TMSB4X PE=1 SV=2	P62328	1	3	6	6	7.32e-05	0.455	TETQEKNPLPSK	0.996	45.8	27.3	27			686.358	1370.7	2	-1.809	367873
Control-1	Thymosin beta-4 OS=Homo sapiens GN=TMSB4X PE=1 SV=2	P62328	1	3	6	6	7.32e-05	0.455	TETQEKNPLPSK	0.997	29.6	27.1	18.5			457.909	1370.7	3	-0.2245	1824000
Control-1	Galectin-9C OS=Homo sapiens GN=LGALS9C PE=1 SV=2	Q6DKI2	0.439	0	0	3	3.66e-05	0.112	FEDGGYVVcNTR	0.997	39.7	25	39.7	c9: Carbamidomethyl (+57.02)		708.815	1415.61	2	0.3055	792945	O00182,Q3B8N2
Control-1	Galectin-9C OS=Homo sapiens GN=LGALS9C PE=1 SV=2	Q6DKI2	0.439	0	0	3	3.66e-05	0.112	LEVGGDIQLTHVQT	0.997	47	27.9	42.1			755.4	1508.78	2	0.7405	774394	O00182,Q3B8N2
Control-1	Galectin-9C OS=Homo sapiens GN=LGALS9C PE=1 SV=2	Q6DKI2	0.439	0	0	3	3.66e-05	0.112	SIILSGTVLPSAQR	0.989	21.9	25	0			721.423	1440.83	2	0.5119	2266530	O00182,Q3B8N2
Control-1	Protein CDV3 homolog OS=Homo sapiens GN=CDV3 PE=1 SV=1	Q9UKY7	1	2	2	2	2.44e-05	0.279	AASAAGAAGSAGGSSGAAGAAGGGAGAGTRPGDGGTASAGAAGPGAATK	0.997	66.5	27.2	64.2			918.186	3668.72	4	0.8192	507638
Control-1	Protein CDV3 homolog OS=Homo sapiens GN=CDV3 PE=1 SV=1	Q9UKY7	1	2	2	2	2.44e-05	0.279	KTPQGPPEIYSDTQFPSLQSTAK	0.989	26.2	28.4	26			840.758	2519.25	3	-1.471	807125
Control-1	Nuclear autoantigen Sp-100 OS=Homo sapiens GN=SP100 PE=1 SV=3	P23497	0.782	0	0	2	2.44e-05	0.0102	FKDPNAPK	0.99	28.6	26.6	14.2			458.748	915.482	2	0.2379	631627	P09429,B2RPK0
Control-1	Nuclear autoantigen Sp-100 OS=Homo sapiens GN=SP100 PE=1 SV=3	P23497	0.782	0	0	2	2.44e-05	0.0102	KFKDPNAPK	0.995	28.4	26.9	15.8			522.797	1043.58	2	3.1	255054	P09429,B2RPK0
Control-1	Ubiquitin thioesterase OTUB1 OS=Homo sapiens GN=OTUB1 PE=1 SV=2	Q96FW1	1	2	2	2	2.44e-05	0.111	AFGFSHLEALLDDSK	0.997	50	28.1	37.2			550.612	1648.81	3	2.498	664964
Control-1	Ubiquitin thioesterase OTUB1 OS=Homo sapiens GN=OTUB1 PE=1 SV=2	Q96FW1	1	2	2	2	2.44e-05	0.111	IQQEIAVQNPLVSER	0.997	52.2	26.5	47			862.471	1722.93	2	1.089	520673
Control-1	Small nuclear ribonucleoprotein Sm D3 OS=Homo sapiens GN=SNRPD3 PE=1 SV=1	P62318	1	2	2	2	2.44e-05	0.238	FLILPDMLK	0.992	23.6	25	12			545.322	1088.63	2	-0.6258	398306
Control-1	Small nuclear ribonucleoprotein Sm D3 OS=Homo sapiens GN=SNRPD3 PE=1 SV=1	P62318	1	2	2	2	2.44e-05	0.238	VLHEAEGHIVTcETNTGEVYR	0.997	39.9	27.5	33.5	c12: Carbamidomethyl (+57.02)		805.388	2413.14	3	3.201	912807
Control-1	Integrin beta-1 OS=Homo sapiens GN=ITGB1 PE=1 SV=2	P05556	1	13	13	13	0.000159	0.189	cDDLEALK	0.99	33.1	25	17.1	c1: Carbamidomethyl (+57.02)		482.226	962.438	2	-0.568	1229350
Control-1	Integrin beta-1 OS=Homo sapiens GN=ITGB1 PE=1 SV=2	P05556	1	13	13	13	0.000159	0.189	FcEcDNFNcDR	0.997	59	25	59	c2: Carbamidomethyl (+57.02), c4: Carbamidomethyl (+57.02), c9: Carbamidomethyl (+57.02)		768.769	1535.52	2	0.3528	883448
Control-1	Integrin beta-1 OS=Homo sapiens GN=ITGB1 PE=1 SV=2	P05556	1	13	13	13	0.000159	0.189	GIcEcGVcK	0.98	19.8	25	15.5	c3: Carbamidomethyl (+57.02), c5: Carbamidomethyl (+57.02), c8: Carbamidomethyl (+57.02)		541.726	1081.44	2	0.9997	428230
Control-1	Integrin beta-1 OS=Homo sapiens GN=ITGB1 PE=1 SV=2	P05556	1	13	13	13	0.000159	0.189	HcEcSTDEVNSEDMDAYcR	0.997	39.3	25	39.3	c2: Carbamidomethyl (+57.02), c4: Carbamidomethyl (+57.02), c18: Carbamidomethyl (+57.02)		793.286	2376.84	3	0.318	870102
Control-1	Integrin beta-1 OS=Homo sapiens GN=ITGB1 PE=1 SV=2	P05556	1	13	13	13	0.000159	0.189	IGFGSFVEK	0.997	38.8	25.2	37.9			492.263	982.512	2	-0.1036	1897160
Control-1	Integrin beta-1 OS=Homo sapiens GN=ITGB1 PE=1 SV=2	P05556	1	13	13	13	0.000159	0.189	LKPEDITQIQPQQLVLR	0.997	55.4	25	54.5			673.726	2018.16	3	1.843	1953860
Control-1	Integrin beta-1 OS=Homo sapiens GN=ITGB1 PE=1 SV=2	P05556	1	13	13	13	0.000159	0.189	LLVFSTDAGFHFAGDGK	0.997	42.3	28.3	42.3			594.634	1780.88	3	0.0685	989354
Control-1	Integrin beta-1 OS=Homo sapiens GN=ITGB1 PE=1 SV=2	P05556	1	13	13	13	0.000159	0.189	LSEGVTISYK	0.997	45	26.5	41.1			548.799	1095.58	2	1.457	1382020
Control-1	Integrin beta-1 OS=Homo sapiens GN=ITGB1 PE=1 SV=2	P05556	1	13	13	13	0.000159	0.189	NVLSLTNK	0.981	20.8	26.4	11.3			444.762	887.508	2	0.8982	2518350
Control-1	Integrin beta-1 OS=Homo sapiens GN=ITGB1 PE=1 SV=2	P05556	1	13	13	13	0.000159	0.189	SAVTTVVNPK	0.997	62.9	25.7	56.7			508.293	1014.57	2	-0.001912	2400570
Control-1	Integrin beta-1 OS=Homo sapiens GN=ITGB1 PE=1 SV=2	P05556	1	13	13	13	0.000159	0.189	SGEPQTFTLK	0.997	42	27.9	34.4			554.289	1106.56	2	1.587	1043520
Control-1	Integrin beta-1 OS=Homo sapiens GN=ITGB1 PE=1 SV=2	P05556	1	13	13	13	0.000159	0.189	SLGTDLMNEMR	0.997	34.5	25.3	34.5			633.794	1265.57	2	-0.1121	1188980
Control-1	Integrin beta-1 OS=Homo sapiens GN=ITGB1 PE=1 SV=2	P05556	1	13	13	13	0.000159	0.189	TVMPYISTTPAK	0.997	40.2	27.6	38.4			654.847	1307.68	2	-0.2002	919418
Control-1	Sarcolemmal membrane-associated protein OS=Homo sapiens GN=SLMAP PE=1 SV=1	Q14BN4	1	7	9	9	0.00011	0.105	DDLQGAQSEIEAK	0.997	52.3	25.6	52.3			702.338	1402.66	2	2.307	1058910
Control-1	Sarcolemmal membrane-associated protein OS=Homo sapiens GN=SLMAP PE=1 SV=1	Q14BN4	1	7	9	9	0.00011	0.105	DEILLLHQAAAK	0.997	47.6	25.4	37			661.377	1320.74	2	-0.3041	1057530
Control-1	Sarcolemmal membrane-associated protein OS=Homo sapiens GN=SLMAP PE=1 SV=1	Q14BN4	1	7	9	9	0.00011	0.105	DEILLLHQAAAK	0.997	34.1	25.4	25.9			441.254	1320.74	3	0.3269	950727
Control-1	Sarcolemmal membrane-associated protein OS=Homo sapiens GN=SLMAP PE=1 SV=1	Q14BN4	1	7	9	9	0.00011	0.105	DTDIASLQEELKK	0.997	31.1	28.5	27			745.391	1488.77	2	0.1329	1178430
Control-1	Sarcolemmal membrane-associated protein OS=Homo sapiens GN=SLMAP PE=1 SV=1	Q14BN4	1	7	9	9	0.00011	0.105	EEKDSEITSTR	0.969	17.7	25.7	13.5			432.209	1293.6	3	-0.2379	495087
Control-1	Sarcolemmal membrane-associated protein OS=Homo sapiens GN=SLMAP PE=1 SV=1	Q14BN4	1	7	9	9	0.00011	0.105	EEKDSEITSTR	0.997	46.2	25.3	40.4			647.809	1293.6	2	-1.052	202487
Control-1	Sarcolemmal membrane-associated protein OS=Homo sapiens GN=SLMAP PE=1 SV=1	Q14BN4	1	7	9	9	0.00011	0.105	ENVLLSSELQR	0.997	49.9	27.7	39.6			644.349	1286.68	2	0.48	4390020
Control-1	Sarcolemmal membrane-associated protein OS=Homo sapiens GN=SLMAP PE=1 SV=1	Q14BN4	1	7	9	9	0.00011	0.105	QIQVLQAQLQR	0.997	46.9	25	41.7			662.889	1323.76	2	0.6175	1034570
Control-1	Sarcolemmal membrane-associated protein OS=Homo sapiens GN=SLMAP PE=1 SV=1	Q14BN4	1	7	9	9	0.00011	0.105	QSLELTSDLSILQMSR	0.997	46.7	28.2	46.7			910.975	1819.94	2	0.4602	803491
Control-1	Translocon-associated protein subunit delta OS=Homo sapiens GN=SSR4 PE=1 SV=1	P51571	1	2	2	2	2.44e-05	0.168	NNEDISIIPPLFTVSVDHR	0.997	26.5	28.1	26.5			722.711	2165.11	3	-0.156	1172750
Control-1	Translocon-associated protein subunit delta OS=Homo sapiens GN=SSR4 PE=1 SV=1	P51571	1	2	2	2	2.44e-05	0.168	SAHAGTYEVR	0.997	30.6	26.3	27.4			545.767	1089.52	2	-0.1485	587890
Control-1	Syntaxin-binding protein 1 OS=Homo sapiens GN=STXBP1 PE=1 SV=1	P61764	1	2	2	2	2.44e-05	0.0303	ISEQTYQLSR	0.994	53.8	26.9	48			612.817	1223.62	2	3.134	762591
Control-1	Syntaxin-binding protein 1 OS=Homo sapiens GN=STXBP1 PE=1 SV=1	P61764	1	2	2	2	2.44e-05	0.0303	SQLLILDR	0.99	27.1	25	17.7			479.29	956.565	2	-0.6704	755596
Control-1	Polyadenylate-binding protein 3 OS=Homo sapiens GN=PABPC3 PE=1 SV=2	Q9H361	0.707	0	0	4	4.88e-05	0.0666	FGPALSVK	0.976	20.5	27.9	10.1			409.742	817.47	2	-0.3445	915085	P11940
Control-1	Polyadenylate-binding protein 3 OS=Homo sapiens GN=PABPC3 PE=1 SV=2	Q9H361	0.707	0	0	4	4.88e-05	0.0666	FSPAGPILSIR	0.997	39.3	25.6	38.9			579.338	1156.66	2	0.7757	990174	P11940,Q4VXU2
Control-1	Polyadenylate-binding protein 3 OS=Homo sapiens GN=PABPC3 PE=1 SV=2	Q9H361	0.707	0	0	4	4.88e-05	0.0666	GFGFVSFER	0.997	29.2	25.7	23.8			523.259	1044.5	2	0.6103	963540	P11940
Control-1	Polyadenylate-binding protein 3 OS=Homo sapiens GN=PABPC3 PE=1 SV=2	Q9H361	0.707	0	0	4	4.88e-05	0.0666	IVATKPLYVALAQR	0.994	52.8	25	52.8			514.983	1541.93	3	-2.014	1856530	P11940
Control-1	Alpha/beta hydrolase domain-containing protein 14B OS=Homo sapiens GN=ABHD14B PE=1 SV=1	Q96IU4	1	4	4	4	4.88e-05	0.224	AVAIDLPGLGHSK	0.997	25.5	26.2	17.6			426.579	1276.71	3	-0.3428	1236780
Control-1	Alpha/beta hydrolase domain-containing protein 14B OS=Homo sapiens GN=ABHD14B PE=1 SV=1	Q96IU4	1	4	4	4	4.88e-05	0.224	EALPGSGQAR	0.995	24.7	25.6	11.9			493.257	984.5	2	1.459	611021
Control-1	Alpha/beta hydrolase domain-containing protein 14B OS=Homo sapiens GN=ABHD14B PE=1 SV=1	Q96IU4	1	4	4	4	4.88e-05	0.224	EGTIQVQGQALFFR	0.997	37	27.7	37			797.424	1592.83	2	1.379	1382670
Control-1	Alpha/beta hydrolase domain-containing protein 14B OS=Homo sapiens GN=ABHD14B PE=1 SV=1	Q96IU4	1	4	4	4	4.88e-05	0.224	FSVLLLHGIR	0.997	26.4	25	21.8			385.573	1153.7	3	-0.6564	570878
Control-1	Proteasome activator complex subunit 2 OS=Homo sapiens GN=PSME2 PE=1 SV=4	Q9UL46	1	2	2	2	2.44e-05	0.0711	DEAAYGELR	0.997	26.5	25	20.9			512.242	1022.47	2	2.421	1744340
Control-1	Proteasome activator complex subunit 2 OS=Homo sapiens GN=PSME2 PE=1 SV=4	Q9UL46	1	2	2	2	2.44e-05	0.0711	ETHVMDYR	0.99	22.7	25	17			525.738	1049.46	2	1.16	497735
Control-1	Inorganic pyrophosphatase OS=Homo sapiens GN=PPA1 PE=1 SV=2	Q15181	1	4	4	4	4.88e-05	0.208	AAPFSLEYR	0.997	33.6	26.2	33.6			527.272	1052.53	2	0.5297	852077
Control-1	Inorganic pyrophosphatase OS=Homo sapiens GN=PPA1 PE=1 SV=2	Q15181	1	4	4	4	4.88e-05	0.208	GIScMNTTLSESPFK	0.997	34.4	25.4	34.4	c4: Carbamidomethyl (+57.02)		836.389	1670.76	2	-0.3872	712780
Control-1	Inorganic pyrophosphatase OS=Homo sapiens GN=PPA1 PE=1 SV=2	Q15181	1	4	4	4	4.88e-05	0.208	LKPGYLEATVDWFR	0.997	33.5	27.7	33.5			565.635	1693.88	3	0.2431	875350
Control-1	Inorganic pyrophosphatase OS=Homo sapiens GN=PPA1 PE=1 SV=2	Q15181	1	4	4	4	4.88e-05	0.208	VIAINVDDPDAANYNDINDVKR	0.997	50.9	28.3	49.8			815.407	2443.2	3	-0.05644	1187950
Control-1	Histone H3.1 OS=Homo sapiens GN=HIST1H3A PE=1 SV=2	P68431	0.434	0	0	2	2.44e-05	0.154	VTIMPKDIQLAR	0.997	27.5	25	19.6			462.271	1383.79	3	0.2687	1119020	P84243,Q71DI3,Q16695,Q6NXT2
Control-1	Histone H3.1 OS=Homo sapiens GN=HIST1H3A PE=1 SV=2	P68431	0.434	0	0	2	2.44e-05	0.154	YRPGTVALR	0.975	18.6	27	11.6			516.801	1031.59	2	0.1918	15135700	P84243,Q71DI3,Q16695,Q6NXT2
Control-1	Coronin-1C OS=Homo sapiens GN=CORO1C PE=1 SV=1	Q9ULV4	1	10	12	15	0.000183	0.228	AIFLADGNVFTTGFSR	0.994	53.1	27.6	51.8			858.439	1714.86	2	-2.181	756119
Control-1	Coronin-1C OS=Homo sapiens GN=CORO1C PE=1 SV=1	Q9ULV4	1	10	12	15	0.000183	0.228	AIFLADGNVFTTGFSR	0.996	53.3	27.6	44.3			572.629	1714.87	3	-1.578	392027
Control-1	Coronin-1C OS=Homo sapiens GN=CORO1C PE=1 SV=1	Q9ULV4	1	10	12	15	0.000183	0.228	AIFLADGNVFTTGFSR	0.997	52.2	27.8	46.6			858.442	1714.87	2	1.444	772166
Control-1	Coronin-1C OS=Homo sapiens GN=CORO1C PE=1 SV=1	Q9ULV4	1	10	12	15	0.000183	0.228	AIFLADGNVFTTGFSR	0.997	31.1	28.1	27.3			572.63	1714.87	3	0.8696	433701
Control-1	Coronin-1C OS=Homo sapiens GN=CORO1C PE=1 SV=1	Q9ULV4	1	10	12	15	0.000183	0.228	HVFGQAVK	0.965	18.2	25	12.2			443.25	884.486	2	-0.4991	1774050
Control-1	Coronin-1C OS=Homo sapiens GN=CORO1C PE=1 SV=1	Q9ULV4	1	10	12	15	0.000183	0.228	KcEPIIMTVPR	0.989	23.8	27.2	18.7	c2: Carbamidomethyl (+57.02)		448.577	1342.71	3	-0.4638	4202440
Control-1	Coronin-1C OS=Homo sapiens GN=CORO1C PE=1 SV=1	Q9ULV4	1	10	12	15	0.000183	0.228	KQEIVAEKEK	0.997	42.4	25.8	24.4			401.231	1200.67	3	-0.9054	505967
Control-1	Coronin-1C OS=Homo sapiens GN=CORO1C PE=1 SV=1	Q9ULV4	1	10	12	15	0.000183	0.228	KQEIVAEKEK	0.997	32.2	27.1	19.4			601.343	1200.67	2	-0.168	265011
Control-1	Coronin-1C OS=Homo sapiens GN=CORO1C PE=1 SV=1	Q9ULV4	1	10	12	15	0.000183	0.228	KTTDTASVQNEAK	0.982	97.1	28.1	70.5			696.852	1391.69	2	0.214	101531
Control-1	Coronin-1C OS=Homo sapiens GN=CORO1C PE=1 SV=1	Q9ULV4	1	10	12	15	0.000183	0.228	NADPILISLK	0.997	37.2	25	30.3			542.324	1082.63	2	-0.7954	2542500
Control-1	Coronin-1C OS=Homo sapiens GN=CORO1C PE=1 SV=1	Q9ULV4	1	10	12	15	0.000183	0.228	NDQcYDDIR	0.997	31.1	25	24.1	c4: Carbamidomethyl (+57.02)		599.744	1197.47	2	0.528	1293190
Control-1	Coronin-1C OS=Homo sapiens GN=CORO1C PE=1 SV=1	Q9ULV4	1	10	12	15	0.000183	0.228	NILDSKPTANKK	0.994	24	26.1	9.96			664.88	1327.75	2	0.01359	200548
Control-1	Coronin-1C OS=Homo sapiens GN=CORO1C PE=1 SV=1	Q9ULV4	1	10	12	15	0.000183	0.228	QLALWNPK	0.99	36	25	28.4			485.28	968.545	2	0.5756	1340080
Control-1	Coronin-1C OS=Homo sapiens GN=CORO1C PE=1 SV=1	Q9ULV4	1	10	12	15	0.000183	0.228	TTDTASVQNEAK	0.997	58.7	25.6	52.8			632.804	1263.59	2	-0.5076	360354
Control-1	Coronin-1C OS=Homo sapiens GN=CORO1C PE=1 SV=1	Q9ULV4	1	10	12	15	0.000183	0.228	VGIVAWHPTAR	0.991	24	26.6	24			402.896	1205.67	3	-0.5867	1236110
Control-1	Rab GDP dissociation inhibitor alpha OS=Homo sapiens GN=GDI1 PE=1 SV=2	P31150	1	4	4	7	8.55e-05	0.161	DWNVDLIPK	0.984	20.6	26.1	19.1			550.293	1098.57	2	0.744	521609	P50395
Control-1	Rab GDP dissociation inhibitor alpha OS=Homo sapiens GN=GDI1 PE=1 SV=2	P31150	1	4	4	7	8.55e-05	0.161	FQLLEGPPESMGR	0.997	47.9	27.5	37.5			730.865	1459.72	2	1.628	1054050
Control-1	Rab GDP dissociation inhibitor alpha OS=Homo sapiens GN=GDI1 PE=1 SV=2	P31150	1	4	4	7	8.55e-05	0.161	GRDWNVDLIPK	0.997	29.8	26.3	24.8			438.238	1311.69	3	-0.7145	833723	P50395
Control-1	Rab GDP dissociation inhibitor alpha OS=Homo sapiens GN=GDI1 PE=1 SV=2	P31150	1	4	4	7	8.55e-05	0.161	LYSESLAR	0.99	25.6	25.5	20.8			469.751	937.487	2	-0.08731	1100220	P50395
Control-1	Rab GDP dissociation inhibitor alpha OS=Homo sapiens GN=GDI1 PE=1 SV=2	P31150	1	4	4	7	8.55e-05	0.161	QLIcDPSYIPDR	0.988	25.9	27.4	23	c4: Carbamidomethyl (+57.02)		738.86	1475.71	2	-2.091	915385
Control-1	Rab GDP dissociation inhibitor alpha OS=Homo sapiens GN=GDI1 PE=1 SV=2	P31150	1	4	4	7	8.55e-05	0.161	TDDYLDQPcLETVNR	0.997	56.9	25.9	54.4	c9: Carbamidomethyl (+57.02)		919.917	1837.82	2	1.921	444893
Control-1	Rab GDP dissociation inhibitor alpha OS=Homo sapiens GN=GDI1 PE=1 SV=2	P31150	1	4	4	7	8.55e-05	0.161	TFEGVDPQTTSMR	0.997	29.2	25	29.2			734.841	1467.67	2	-0.05579	886765
Control-1	Alpha-actinin-2 OS=Homo sapiens GN=ACTN2 PE=1 SV=1	P35609	0.377	0	0	18	0.00022	0.147	AGTQIENIEEDFR	0.997	59.3	26.5	53.1			761.362	1520.71	2	-0.4481	1452400	Q08043,P12814
Control-1	Alpha-actinin-2 OS=Homo sapiens GN=ACTN2 PE=1 SV=1	P35609	0.377	0	0	18	0.00022	0.147	cQLEINFNTLQTK	0.997	42.8	28	37.8	c1: Carbamidomethyl (+57.02)		804.908	1607.8	2	1.674	1622120	Q08043,O43707,P12814
Control-1	Alpha-actinin-2 OS=Homo sapiens GN=ACTN2 PE=1 SV=1	P35609	0.377	0	0	18	0.00022	0.147	EGLLLWcQR	0.997	39.4	27.8	29.1	c7: Carbamidomethyl (+57.02)		587.806	1173.6	2	0.113	2818750	Q08043,O43707,P12814
Control-1	Alpha-actinin-2 OS=Homo sapiens GN=ACTN2 PE=1 SV=1	P35609	0.377	0	0	18	0.00022	0.147	FAIQDISVEETSAK	0.996	46.8	27.7	46.8			769.393	1536.77	2	2.73	1149410	Q08043,O43707,P12814
Control-1	Alpha-actinin-2 OS=Homo sapiens GN=ACTN2 PE=1 SV=1	P35609	0.377	0	0	18	0.00022	0.147	GYEEWLLNEIR	0.997	43.5	27.8	37.3			711.356	1420.7	2	-0.9861	1164110	O43707,P12814
Control-1	Alpha-actinin-2 OS=Homo sapiens GN=ACTN2 PE=1 SV=1	P35609	0.377	0	0	18	0.00022	0.147	GYEEWLLNEIR	0.997	45.7	27.7	36			474.573	1420.7	3	-0.301	443609	O43707,P12814
Control-1	Alpha-actinin-2 OS=Homo sapiens GN=ACTN2 PE=1 SV=1	P35609	0.377	0	0	18	0.00022	0.147	HTNYTMEHIR	0.997	30.6	25	30.6			651.306	1300.6	2	-1.338	761025	O43707,P12814
Control-1	Alpha-actinin-2 OS=Homo sapiens GN=ACTN2 PE=1 SV=1	P35609	0.377	0	0	18	0.00022	0.147	HTNYTmEHIR	0.997	33.8	25	33.8		m6: Oxidation (+15.99)	439.872	1316.59	3	1.25	791028	O43707,P12814
Control-1	Alpha-actinin-2 OS=Homo sapiens GN=ACTN2 PE=1 SV=1	P35609	0.377	0	0	18	0.00022	0.147	HTNYTMEHIR	0.997	36.8	25	30.9			434.539	1300.6	3	-1.965	1150920	O43707,P12814
Control-1	Alpha-actinin-2 OS=Homo sapiens GN=ACTN2 PE=1 SV=1	P35609	0.377	0	0	18	0.00022	0.147	ISNRPAFMPSEGK	0.997	34.2	27.6	0			717.365	1432.72	2	1.268	762140	O43707
Control-1	Alpha-actinin-2 OS=Homo sapiens GN=ACTN2 PE=1 SV=1	P35609	0.377	0	0	18	0.00022	0.147	ISNRPAFMPSEGK	0.997	29.5	27.5	0			478.579	1432.71	3	0.4409	2463870	O43707
Control-1	Alpha-actinin-2 OS=Homo sapiens GN=ACTN2 PE=1 SV=1	P35609	0.377	0	0	18	0.00022	0.147	KAGTQIENIEEDFR	0.997	35.3	27.8	35.3			550.61	1648.81	3	0.8135	1715040	Q08043,P12814
Control-1	Alpha-actinin-2 OS=Homo sapiens GN=ACTN2 PE=1 SV=1	P35609	0.377	0	0	18	0.00022	0.147	KHEAFESDLAAHQDR	0.992	66.4	26.7	62.3			877.419	1752.82	2	2.793	245720	O43707,P12814
Control-1	Alpha-actinin-2 OS=Homo sapiens GN=ACTN2 PE=1 SV=1	P35609	0.377	0	0	18	0.00022	0.147	KTFTAWcNSHLR	0.997	38.8	27.8	35.8	c7: Carbamidomethyl (+57.02)		507.586	1519.74	3	-0.2454	1427260	Q08043,O43707,P12814
Control-1	Alpha-actinin-2 OS=Homo sapiens GN=ACTN2 PE=1 SV=1	P35609	0.377	0	0	18	0.00022	0.147	LmLLLEVISGER	0.997	51.3	25.9	43.7		m2: Oxidation (+15.99)	694.896	1387.78	2	1.63	758138	Q08043,O43707,P12814
Control-1	Alpha-actinin-2 OS=Homo sapiens GN=ACTN2 PE=1 SV=1	P35609	0.377	0	0	18	0.00022	0.147	TFTAWcNSHLR	0.988	21.6	25.5	21.2	c6: Carbamidomethyl (+57.02)		464.888	1391.64	3	0.5147	3211790	Q08043,O43707,P12814
Control-1	Alpha-actinin-2 OS=Homo sapiens GN=ACTN2 PE=1 SV=1	P35609	0.377	0	0	18	0.00022	0.147	TFTAWcNSHLR	0.997	31.6	25.3	31.6	c6: Carbamidomethyl (+57.02)		696.829	1391.64	2	2.048	1181910	Q08043,O43707,P12814
Control-1	Alpha-actinin-2 OS=Homo sapiens GN=ACTN2 PE=1 SV=1	P35609	0.377	0	0	18	0.00022	0.147	TIPWLENR	0.976	18.1	25	14			514.78	1027.55	2	0.212	1256470	P12814
Control-1	Coronin-1A OS=Homo sapiens GN=CORO1A PE=1 SV=4	P31146	1	4	4	4	4.88e-05	0.0911	DAGPLLISLK	0.997	35.1	25	32.5			513.814	1025.61	2	0.2708	663687
Control-1	Coronin-1A OS=Homo sapiens GN=CORO1A PE=1 SV=4	P31146	1	4	4	4	4.88e-05	0.0911	HVFGQPAK	0.982	22.5	25	14.9			442.243	882.47	2	-0.8851	660658
Control-1	Coronin-1A OS=Homo sapiens GN=CORO1A PE=1 SV=4	P31146	1	4	4	4	4.88e-05	0.0911	ILTTGFSR	0.966	16.9	25	15.1			447.756	893.497	2	-0.002171	1694200
Control-1	Coronin-1A OS=Homo sapiens GN=CORO1A PE=1 SV=4	P31146	1	4	4	4	4.88e-05	0.0911	VSQTTWDSGFcAVNPK	0.997	58.8	25.7	58.8	c11: Carbamidomethyl (+57.02)		898.918	1795.82	2	0.341	440742
Control-1	Eukaryotic translation initiation factor 6 OS=Homo sapiens GN=EIF6 PE=1 SV=1	P56537	0.999	2	2	2	2.44e-05	0.114	HGLLVPNNTTDQELQHIR	0.977	19.7	27.9	16.6			695.7	2084.08	3	0.6101	847160
Control-1	Eukaryotic translation initiation factor 6 OS=Homo sapiens GN=EIF6 PE=1 SV=1	P56537	0.999	2	2	2	2.44e-05	0.114	NSLPDTVQIR	0.978	20.1	26.7	9.22			571.812	1141.61	2	0.926	1145480
Control-1	Nucleolar protein 56 OS=Homo sapiens GN=NOP56 PE=1 SV=4	O00567	1	2	2	2	2.44e-05	0.0438	IDcFSEVPTSVFGEK	0.997	32.8	26	32.5	c3: Carbamidomethyl (+57.02)		857.905	1713.79	2	1.535	606154
Control-1	Nucleolar protein 56 OS=Homo sapiens GN=NOP56 PE=1 SV=4	O00567	1	2	2	2	2.44e-05	0.0438	LSFYETGEIPR	0.997	30.1	27.1	29.2			656.334	1310.65	2	1.92	1072640
Control-1	Annexin A11 OS=Homo sapiens GN=ANXA11 PE=1 SV=1	P50995	1	7	7	7	8.55e-05	0.131	AHLVAVFNEYQR	0.996	25.5	28.3	25.5			482.921	1445.74	3	0.5406	1488170
Control-1	Annexin A11 OS=Homo sapiens GN=ANXA11 PE=1 SV=1	P50995	1	7	7	7	8.55e-05	0.131	DAQELYAAGENR	0.997	26.6	25	15.5			668.81	1335.61	2	0.08833	1213620
Control-1	Annexin A11 OS=Homo sapiens GN=ANXA11 PE=1 SV=1	P50995	1	7	7	7	8.55e-05	0.131	FNAVLcSR	0.99	37.6	27.4	12.3	c6: Carbamidomethyl (+57.02)		483.745	965.476	2	0.5305	1109870
Control-1	Annexin A11 OS=Homo sapiens GN=ANXA11 PE=1 SV=1	P50995	1	7	7	7	8.55e-05	0.131	SDTSGHFQR	0.997	55.2	25	49.4			517.736	1033.46	2	-0.2725	364461
Control-1	Annexin A11 OS=Homo sapiens GN=ANXA11 PE=1 SV=1	P50995	1	7	7	7	8.55e-05	0.131	SETDLLDIR	0.997	43.1	28	34.5			531.278	1060.54	2	1.147	939670
Control-1	Annexin A11 OS=Homo sapiens GN=ANXA11 PE=1 SV=1	P50995	1	7	7	7	8.55e-05	0.131	SLYHDISGDTSGDYR	0.997	26.1	25	26.1			562.586	1684.73	3	1.075	1029070
Control-1	Annexin A11 OS=Homo sapiens GN=ANXA11 PE=1 SV=1	P50995	1	7	7	7	8.55e-05	0.131	SLYHDISGDTSGDYRK	0.997	24.9	25.8	24.9			454.215	1812.83	4	0.4775	1157720
Control-1	Sodium/potassium-transporting ATPase subunit alpha-2 OS=Homo sapiens GN=ATP1A2 PE=1 SV=1	P50993	0.758	0	0	13	0.000159	0.119	AAVPDAVGK	0.997	32.2	25	27.2			414.234	826.454	2	-0.9208	1573470	P13637,P05023
Control-1	Sodium/potassium-transporting ATPase subunit alpha-2 OS=Homo sapiens GN=ATP1A2 PE=1 SV=1	P50993	0.758	0	0	13	0.000159	0.119	AcVVHGSDLK	0.997	56.4	26	44.5	c2: Carbamidomethyl (+57.02)		543.274	1084.53	2	-0.6515	1017970	P05023
Control-1	Sodium/potassium-transporting ATPase subunit alpha-2 OS=Homo sapiens GN=ATP1A2 PE=1 SV=1	P50993	0.758	0	0	13	0.000159	0.119	GVGIISEGNETVEDIAAR	0.978	87.7	27.5	87.7			915.465	1828.92	2	-0.8863	745877	P13637,P05023
Control-1	Sodium/potassium-transporting ATPase subunit alpha-2 OS=Homo sapiens GN=ATP1A2 PE=1 SV=1	P50993	0.758	0	0	13	0.000159	0.119	GVGIISEGNETVEDIAAR	0.997	35.3	27.5	29.7			610.647	1828.92	3	0.6186	1750590	P13637,P05023
Control-1	Sodium/potassium-transporting ATPase subunit alpha-2 OS=Homo sapiens GN=ATP1A2 PE=1 SV=1	P50993	0.758	0	0	13	0.000159	0.119	LIFDNLKK	0.966	16.6	25	9.17			495.803	989.592	2	0.6643	1010750	P13637,P20648,Q13733,P54707,P05023
Control-1	Sodium/potassium-transporting ATPase subunit alpha-2 OS=Homo sapiens GN=ATP1A2 PE=1 SV=1	P50993	0.758	0	0	13	0.000159	0.119	NLEAVETLGSTSTIcSDK	0.989	85.8	27	85.6	c15: Carbamidomethyl (+57.02)		962.962	1923.91	2	0.07936	439649	P13637,Q13733,P05023
Control-1	Sodium/potassium-transporting ATPase subunit alpha-2 OS=Homo sapiens GN=ATP1A2 PE=1 SV=1	P50993	0.758	0	0	13	0.000159	0.119	NMVPQQALVIR	0.996	24.2	25	24.2			634.861	1267.71	2	-0.2222	1174600	P13637,Q13733,P05023
Control-1	Sodium/potassium-transporting ATPase subunit alpha-2 OS=Homo sapiens GN=ATP1A2 PE=1 SV=1	P50993	0.758	0	0	13	0.000159	0.119	QGAIVAVTGDGVNDSPALK	0.994	75.7	27.1	75			906.48	1810.94	2	1.191	568030	P13637,P05023
Control-1	Sodium/potassium-transporting ATPase subunit alpha-2 OS=Homo sapiens GN=ATP1A2 PE=1 SV=1	P50993	0.758	0	0	13	0.000159	0.119	QGAIVAVTGDGVNDSPALK	0.997	40.2	27.1	40.2			906.479	1810.94	2	0.7826	415495	P13637,P05023
Control-1	Sodium/potassium-transporting ATPase subunit alpha-2 OS=Homo sapiens GN=ATP1A2 PE=1 SV=1	P50993	0.758	0	0	13	0.000159	0.119	VDNSSLTGESEPQTR	0.997	29.3	25.8	29.3			810.38	1618.75	2	1.542	461899	P13637,P20648,P05023
Control-1	Sodium/potassium-transporting ATPase subunit alpha-2 OS=Homo sapiens GN=ATP1A2 PE=1 SV=1	P50993	0.758	0	0	13	0.000159	0.119	VDNSSLTGESEPQTR	0.997	47.5	25.6	47.5			810.38	1618.74	2	0.6409	1169150	P13637,P20648,P05023
Control-1	Sodium/potassium-transporting ATPase subunit alpha-2 OS=Homo sapiens GN=ATP1A2 PE=1 SV=1	P50993	0.758	0	0	13	0.000159	0.119	VIMVTGDHPITAK	0.98	19.6	26.2	15.4			461.255	1380.74	3	0.566	1400490	P13637,P20648,Q13733,P54707,P05023
Control-1	Sodium/potassium-transporting ATPase subunit alpha-2 OS=Homo sapiens GN=ATP1A2 PE=1 SV=1	P50993	0.758	0	0	13	0.000159	0.119	VIMVTGDHPITAK	0.988	55.4	25.7	51.7			691.385	1380.76	2	8.379	768258	P13637,P20648,Q13733,P54707,P05023
Control-1	T-complex protein 1 subunit delta OS=Homo sapiens GN=CCT4 PE=1 SV=4	P50991	1	3	3	4	4.88e-05	0.0983	ALIAGGGAPEIELALR	0.997	54.3	25	54.3			775.95	1549.89	2	1.391	1667560
Control-1	T-complex protein 1 subunit delta OS=Homo sapiens GN=CCT4 PE=1 SV=4	P50991	1	3	3	4	4.88e-05	0.0983	ETLLNSATTSLNSK	0.997	49.8	27.9	49.8			739.889	1477.76	2	0.5532	752124
Control-1	T-complex protein 1 subunit delta OS=Homo sapiens GN=CCT4 PE=1 SV=4	P50991	1	3	3	4	4.88e-05	0.0983	SIHDALcVIR	0.997	27.5	26.6	0	c7: Carbamidomethyl (+57.02)		395.213	1182.62	3	-0.4759	676212	P48643
Control-1	T-complex protein 1 subunit delta OS=Homo sapiens GN=CCT4 PE=1 SV=4	P50991	1	3	3	4	4.88e-05	0.0983	VIDPATATSVDLR	0.997	54.7	26.9	54.1			679.37	1356.73	2	0.08695	1615080
Control-1	T-complex protein 1 subunit theta OS=Homo sapiens GN=CCT8 PE=1 SV=4	P50990	1	7	7	7	8.55e-05	0.161	AIADTGANVVVTGGK	0.997	66.1	27	66.1			686.876	1371.74	2	1.747	917045
Control-1	T-complex protein 1 subunit theta OS=Homo sapiens GN=CCT8 PE=1 SV=4	P50990	1	7	7	7	8.55e-05	0.161	GSTDNLMDDIER	0.997	33.5	25	33.5			683.302	1364.59	2	1.097	1080840
Control-1	T-complex protein 1 subunit theta OS=Homo sapiens GN=CCT8 PE=1 SV=4	P50990	1	7	7	7	8.55e-05	0.161	LATNAAVTVLR	0.997	42.2	25	38.5			564.84	1127.67	2	-0.2498	1307020
Control-1	T-complex protein 1 subunit theta OS=Homo sapiens GN=CCT8 PE=1 SV=4	P50990	1	7	7	7	8.55e-05	0.161	LFVTNDAATILR	0.997	35.8	26.2	25			667.378	1332.74	2	0.9582	1295920
Control-1	T-complex protein 1 subunit theta OS=Homo sapiens GN=CCT8 PE=1 SV=4	P50990	1	7	7	7	8.55e-05	0.161	LVPGGGATEIELAK	0.997	59.3	25.5	55.1			677.882	1353.75	2	-0.5181	1618820
Control-1	T-complex protein 1 subunit theta OS=Homo sapiens GN=CCT8 PE=1 SV=4	P50990	1	7	7	7	8.55e-05	0.161	NVGLDIEAEVPAVK	0.997	46.5	25.7	36.9			727.399	1452.78	2	1.264	1036700
Control-1	T-complex protein 1 subunit theta OS=Homo sapiens GN=CCT8 PE=1 SV=4	P50990	1	7	7	7	8.55e-05	0.161	TAEELMNFSK	0.974	18	25.7	14.1			585.279	1168.54	2	0.3917	1036670
Control-1	Platelet-activating factor acetylhydrolase IB subunit beta OS=Homo sapiens GN=PAFAH1B2 PE=1 SV=1	P68402	1	3	3	3	3.66e-05	0.157	ELFSPLHALNFGIGGDTTR	0.995	25.4	27.9	25.4			682.354	2044.04	3	0.9399	1220890
Control-1	Platelet-activating factor acetylhydrolase IB subunit beta OS=Homo sapiens GN=PAFAH1B2 PE=1 SV=1	P68402	1	3	3	3	3.66e-05	0.157	GEKPNPLR	0.987	21.5	25	18.4			455.759	909.503	2	-0.2438	595613
Control-1	Platelet-activating factor acetylhydrolase IB subunit beta OS=Homo sapiens GN=PAFAH1B2 PE=1 SV=1	P68402	1	3	3	3	3.66e-05	0.157	IIVLGLLPR	0.997	33	25	33			497.345	992.676	2	1.085	367440
Control-1	Plectin OS=Homo sapiens GN=PLEC PE=1 SV=3	Q15149	1	90	93	100	0.00122	0.244	AALAHSEEVTASQVAATK	0.994	56.2	27.8	52.2			595.313	1782.92	3	3.045	1387680
Control-1	Plectin OS=Homo sapiens GN=PLEC PE=1 SV=3	Q15149	1	90	93	100	0.00122	0.244	AELELELGR	0.977	20.1	26.6	18.2			515.283	1028.55	2	1.086	1179560
Control-1	Plectin OS=Homo sapiens GN=PLEC PE=1 SV=3	Q15149	1	90	93	100	0.00122	0.244	AEVVETTQVYTEEETRR	0.977	20.8	28	20.8			680.668	2038.98	3	1.173	845898
Control-1	Plectin OS=Homo sapiens GN=PLEC PE=1 SV=3	Q15149	1	90	93	100	0.00122	0.244	AGVAAPATQVAQVTLQSVQR	0.997	39.2	25	39.2			665.705	1994.09	3	1.224	1453940
Control-1	Plectin OS=Homo sapiens GN=PLEC PE=1 SV=3	Q15149	1	90	93	100	0.00122	0.244	AGVVGPELHEQLLSAEK	0.997	33.2	26.8	33.2			592.988	1775.94	3	0.2825	2142460
Control-1	Plectin OS=Homo sapiens GN=PLEC PE=1 SV=3	Q15149	1	90	93	100	0.00122	0.244	ALAEEAKR	0.99	24	26.4	12.8			444.251	886.487	2	-0.7459	665961
Control-1	Plectin OS=Homo sapiens GN=PLEC PE=1 SV=3	Q15149	1	90	93	100	0.00122	0.244	APVPASELLASGVLSR	0.997	57.6	25	47.4			522.966	1565.88	3	-0.3114	678669
Control-1	Plectin OS=Homo sapiens GN=PLEC PE=1 SV=3	Q15149	1	90	93	100	0.00122	0.244	AQAEVEGLGK	0.993	24.1	25.6	19.6			501.267	1000.52	2	-0.5411	999824
Control-1	Plectin OS=Homo sapiens GN=PLEC PE=1 SV=3	Q15149	1	90	93	100	0.00122	0.244	AQLEPVASPAK	0.987	22.1	25	22.1			555.811	1109.61	2	-0.3619	940542
Control-1	Plectin OS=Homo sapiens GN=PLEC PE=1 SV=3	Q15149	1	90	93	100	0.00122	0.244	AQVEQELTTLR	0.997	44.1	27.7	36.9			644.349	1286.68	2	0.5887	1760420
Control-1	Plectin OS=Homo sapiens GN=PLEC PE=1 SV=3	Q15149	1	90	93	100	0.00122	0.244	ARQEELYSELQAR	0.997	28.4	28	27.2			531.606	1591.8	3	0.9305	1946770
Control-1	Plectin OS=Homo sapiens GN=PLEC PE=1 SV=3	Q15149	1	90	93	100	0.00122	0.244	AVVQLKPR	0.97	18.1	25	12.4			455.795	909.576	2	-0.3096	1411140
Control-1	Plectin OS=Homo sapiens GN=PLEC PE=1 SV=3	Q15149	1	90	93	100	0.00122	0.244	cVEDPETGLcLLPLTDK	0.994	55.6	27.5	55.6	c1: Carbamidomethyl (+57.02), c10: Carbamidomethyl (+57.02)		980.472	1958.93	2	-2.098	442552
Control-1	Plectin OS=Homo sapiens GN=PLEC PE=1 SV=3	Q15149	1	90	93	100	0.00122	0.244	DLSELGSVR	0.985	23.3	26.7	21.5			488.259	974.503	2	-0.7196	1367570
Control-1	Plectin OS=Homo sapiens GN=PLEC PE=1 SV=3	Q15149	1	90	93	100	0.00122	0.244	DPYSGSTISLFQAMQK	0.995	25.4	27.8	25.4			886.931	1771.85	2	1.059	812682
Control-1	Plectin OS=Homo sapiens GN=PLEC PE=1 SV=3	Q15149	1	90	93	100	0.00122	0.244	DSQDAGGFGPEDR	0.996	73.3	25	73.3			675.782	1349.55	2	0.2799	668542
Control-1	Plectin OS=Homo sapiens GN=PLEC PE=1 SV=3	Q15149	1	90	93	100	0.00122	0.244	EGLTSIEEVTK	0.997	34.6	27.7	34.2			603.316	1204.62	2	-1.412	1365240
Control-1	Plectin OS=Homo sapiens GN=PLEC PE=1 SV=3	Q15149	1	90	93	100	0.00122	0.244	EGVVGPELHHK	0.993	24.1	27.3	22.6			601.32	1200.63	2	0.3646	407348
Control-1	Plectin OS=Homo sapiens GN=PLEC PE=1 SV=3	Q15149	1	90	93	100	0.00122	0.244	ELIPTEEALR	0.997	32.5	26	27.2			585.823	1169.63	2	2.39	1169670
Control-1	Plectin OS=Homo sapiens GN=PLEC PE=1 SV=3	Q15149	1	90	93	100	0.00122	0.244	EQELQQTLQQEQSVLDQLR	0.996	29.1	28.3	26.7			771.726	2312.16	3	-1.512	1208630
Control-1	Plectin OS=Homo sapiens GN=PLEC PE=1 SV=3	Q15149	1	90	93	100	0.00122	0.244	ESADPLGAWLQDAR	0.997	57.4	26.9	57.4			764.873	1527.73	2	-0.119	1490690
Control-1	Plectin OS=Homo sapiens GN=PLEC PE=1 SV=3	Q15149	1	90	93	100	0.00122	0.244	FLEGTScIAGVFVDATK	0.997	42.5	28	42.5	c7: Carbamidomethyl (+57.02)		907.953	1813.89	2	-0.4338	599460
Control-1	Plectin OS=Homo sapiens GN=PLEC PE=1 SV=3	Q15149	1	90	93	100	0.00122	0.244	FLEVQYLTGGLIEPDTPGR	0.996	43.7	27.7	43.4			702.368	2104.08	3	-1.733	511648
Control-1	Plectin OS=Homo sapiens GN=PLEC PE=1 SV=3	Q15149	1	90	93	100	0.00122	0.244	FLQEEAEK	0.99	23.1	26.2	0.91			497.248	992.482	2	0.0987	1346480
Control-1	Plectin OS=Homo sapiens GN=PLEC PE=1 SV=3	Q15149	1	90	93	100	0.00122	0.244	FPVTDAVNK	0.997	31.8	28.2	7.27			495.767	989.52	2	1.997	1167720
Control-1	Plectin OS=Homo sapiens GN=PLEC PE=1 SV=3	Q15149	1	90	93	100	0.00122	0.244	GFFDPNTHENLTYLQLLER	0.997	46	28.7	46			769.719	2306.14	3	1.015	1352250	P58107
Control-1	Plectin OS=Homo sapiens GN=PLEC PE=1 SV=3	Q15149	1	90	93	100	0.00122	0.244	GLHQSIEEFR	0.997	51.1	26.6	51.1			608.31	1214.61	2	1.496	917782
Control-1	Plectin OS=Homo sapiens GN=PLEC PE=1 SV=3	Q15149	1	90	93	100	0.00122	0.244	GLVGPELHDR	0.983	22.1	27.6	17.2			546.793	1091.57	2	-0.2947	676663
Control-1	Plectin OS=Homo sapiens GN=PLEC PE=1 SV=3	Q15149	1	90	93	100	0.00122	0.244	IISLETYNLLR	0.997	25.1	25	21.2			667.888	1333.76	2	0.2233	951597
Control-1	Plectin OS=Homo sapiens GN=PLEC PE=1 SV=3	Q15149	1	90	93	100	0.00122	0.244	KAALEEVER	0.997	37.1	26.9	30.6			522.787	1043.56	2	-1.208	791373
Control-1	Plectin OS=Homo sapiens GN=PLEC PE=1 SV=3	Q15149	1	90	93	100	0.00122	0.244	KASDSELER	0.997	25.5	26.3	10.2			517.759	1033.5	2	0.2881	300815
Control-1	Plectin OS=Homo sapiens GN=PLEC PE=1 SV=3	Q15149	1	90	93	100	0.00122	0.244	KGLVGPELHDR	0.976	21.6	26.8	18.7			407.563	1219.67	3	-0.7192	1277360
Control-1	Plectin OS=Homo sapiens GN=PLEC PE=1 SV=3	Q15149	1	90	93	100	0.00122	0.244	LAAEQELIR	0.997	44.8	25.3	28.6			521.798	1041.58	2	-1.134	1066680
Control-1	Plectin OS=Homo sapiens GN=PLEC PE=1 SV=3	Q15149	1	90	93	100	0.00122	0.244	LAQGHTTVDELAR	0.995	30.7	27.7	23.9			705.873	1409.73	2	3.685	664723
Control-1	Plectin OS=Homo sapiens GN=PLEC PE=1 SV=3	Q15149	1	90	93	100	0.00122	0.244	LEDLLQDAQDEKEQLNEYK	0.994	31.8	27.5	31.8			774.374	2320.1	3	-2.718	1234470
Control-1	Plectin OS=Homo sapiens GN=PLEC PE=1 SV=3	Q15149	1	90	93	100	0.00122	0.244	LEQLFQDEVAK	0.983	25.9	28	5.46			660.348	1318.68	2	3.257	1169450
Control-1	Plectin OS=Homo sapiens GN=PLEC PE=1 SV=3	Q15149	1	90	93	100	0.00122	0.244	LGFHLPLEVAYQR	0.997	27.8	26.7	27.8			514.952	1541.84	3	-0.1477	535900
Control-1	Plectin OS=Homo sapiens GN=PLEC PE=1 SV=3	Q15149	1	90	93	100	0.00122	0.244	LKAEAELLQQQK	0.997	45.4	25	32.4			699.902	1397.79	2	1.042	545212
Control-1	Plectin OS=Homo sapiens GN=PLEC PE=1 SV=3	Q15149	1	90	93	100	0.00122	0.244	LKAEATEAAR	0.997	35.1	27.7	26			530.295	1058.57	2	2.697	513426
Control-1	Plectin OS=Homo sapiens GN=PLEC PE=1 SV=3	Q15149	1	90	93	100	0.00122	0.244	LLDAQLATGGIVDPR	0.997	31.5	25.6	28.7			513.624	1537.85	3	1.431	606519
Control-1	Plectin OS=Homo sapiens GN=PLEC PE=1 SV=3	Q15149	1	90	93	100	0.00122	0.244	LLDAQLATGGIVDPR	0.997	46	25.8	42			769.93	1537.85	2	-0.4691	1871340
Control-1	Plectin OS=Homo sapiens GN=PLEC PE=1 SV=3	Q15149	1	90	93	100	0.00122	0.244	LLDPEDVDVPQPDEK	0.997	32.6	27.3	32.6			854.918	1707.82	2	0.7128	1347150
Control-1	Plectin OS=Homo sapiens GN=PLEC PE=1 SV=3	Q15149	1	90	93	100	0.00122	0.244	LLEAAAQSTK	0.997	45.2	27.2	38.3			516.29	1030.57	2	0.03689	1249940
Control-1	Plectin OS=Homo sapiens GN=PLEC PE=1 SV=3	Q15149	1	90	93	100	0.00122	0.244	LLEAQIATGGIIDPEESHR	0.997	31.1	28.3	31.1			683.692	2048.06	3	0.733	1924050
Control-1	Plectin OS=Homo sapiens GN=PLEC PE=1 SV=3	Q15149	1	90	93	100	0.00122	0.244	LLEAQIATGGIIDPEESHRLPVEVAYK	0.983	19.6	25	18.8			737.899	2947.57	4	0.4972	1721060
Control-1	Plectin OS=Homo sapiens GN=PLEC PE=1 SV=3	Q15149	1	90	93	100	0.00122	0.244	LLEAQIATGGIIDPVHSHR	0.997	28.4	25.5	26.9			676.372	2026.09	3	-1.109	1242740	P58107
Control-1	Plectin OS=Homo sapiens GN=PLEC PE=1 SV=3	Q15149	1	90	93	100	0.00122	0.244	LLEAQIATGGIIDPVHSHR	0.997	43.7	25.2	43.7			507.532	2026.1	4	1.374	1023820	P58107
Control-1	Plectin OS=Homo sapiens GN=PLEC PE=1 SV=3	Q15149	1	90	93	100	0.00122	0.244	LLEAQIATGGVIDPVHSHR	0.997	51.3	26.4	51.3			671.701	2012.08	3	0.01592	2084710	P58107
Control-1	Plectin OS=Homo sapiens GN=PLEC PE=1 SV=3	Q15149	1	90	93	100	0.00122	0.244	LLFNDVQTLK	0.997	30.5	25.2	20.1			595.842	1189.67	2	-1.127	2489090
Control-1	Plectin OS=Homo sapiens GN=PLEC PE=1 SV=3	Q15149	1	90	93	100	0.00122	0.244	LPLLAVcDYK	0.997	30.8	27.5	26	c7: Carbamidomethyl (+57.02)		596.325	1190.64	2	-0.6774	812609
Control-1	Plectin OS=Homo sapiens GN=PLEC PE=1 SV=3	Q15149	1	90	93	100	0.00122	0.244	LQEAGILSAEELQR	0.974	89.2	27.6	86			778.919	1555.82	2	1.887	1123120
Control-1	Plectin OS=Homo sapiens GN=PLEC PE=1 SV=3	Q15149	1	90	93	100	0.00122	0.244	LQEDKEQMAQQLAEETQGFQR	0.997	32.8	27.6	32.8			836.4	2506.18	3	0.5353	758394
Control-1	Plectin OS=Homo sapiens GN=PLEC PE=1 SV=3	Q15149	1	90	93	100	0.00122	0.244	LQLEATER	0.99	27.5	25.5	17.6			480.262	958.509	2	0.8734	1309750
Control-1	Plectin OS=Homo sapiens GN=PLEC PE=1 SV=3	Q15149	1	90	93	100	0.00122	0.244	LRAETEQGEQQR	0.986	23.2	26.9	18.5			722.86	1443.71	2	-0.5966	66727.8
Control-1	Plectin OS=Homo sapiens GN=PLEC PE=1 SV=3	Q15149	1	90	93	100	0.00122	0.244	LSVYQAMK	0.99	34.9	26	32			470.252	938.49	2	0.8707	929052
Control-1	Plectin OS=Homo sapiens GN=PLEC PE=1 SV=3	Q15149	1	90	93	100	0.00122	0.244	LSYTQLLR	0.99	37.3	25	23.8			497.29	992.565	2	-0.8474	1278110
Control-1	Plectin OS=Homo sapiens GN=PLEC PE=1 SV=3	Q15149	1	90	93	100	0.00122	0.244	LTAEDLFEAR	0.997	53.7	27.4	37.7			582.799	1163.58	2	1.372	978749
Control-1	Plectin OS=Homo sapiens GN=PLEC PE=1 SV=3	Q15149	1	90	93	100	0.00122	0.244	LTVDEAVR	0.99	36.2	26.4	12.5			451.751	901.487	2	-0.1351	1753340
Control-1	Plectin OS=Homo sapiens GN=PLEC PE=1 SV=3	Q15149	1	90	93	100	0.00122	0.244	LTVEEAVR	0.99	24.1	25.8	21.2			458.759	915.503	2	0.6962	2726810	Q9UPN3
Control-1	Plectin OS=Homo sapiens GN=PLEC PE=1 SV=3	Q15149	1	90	93	100	0.00122	0.244	LVASMEEAR	0.997	29.1	27.7	29.1			503.256	1004.5	2	1.828	1225570
Control-1	Plectin OS=Homo sapiens GN=PLEC PE=1 SV=3	Q15149	1	90	93	100	0.00122	0.244	MGIVGPEFK	0.997	30.7	27.4	26.7			489.26	976.506	2	0.2231	759315
Control-1	Plectin OS=Homo sapiens GN=PLEC PE=1 SV=3	Q15149	1	90	93	100	0.00122	0.244	MQAVQEATR	0.996	24.7	26.4	2.64			517.259	1032.5	2	0.5013	763063
Control-1	Plectin OS=Homo sapiens GN=PLEC PE=1 SV=3	Q15149	1	90	93	100	0.00122	0.244	NLLDEELQR	0.993	25.5	26	7.27			565.295	1128.58	2	-1.347	1595540
Control-1	Plectin OS=Homo sapiens GN=PLEC PE=1 SV=3	Q15149	1	90	93	100	0.00122	0.244	NLVDNITGQR	0.997	27.9	27.4	17.6			565.302	1128.59	2	-0.1257	1398250
Control-1	Plectin OS=Homo sapiens GN=PLEC PE=1 SV=3	Q15149	1	90	93	100	0.00122	0.244	QLAAEEER	0.99	33.5	25	25.8			473.236	944.456	2	0.08256	519784
Control-1	Plectin OS=Homo sapiens GN=PLEC PE=1 SV=3	Q15149	1	90	93	100	0.00122	0.244	QLAEAHAQAK	0.997	50.1	26.1	47.6			533.786	1065.56	2	0.2044	323106
Control-1	Plectin OS=Homo sapiens GN=PLEC PE=1 SV=3	Q15149	1	90	93	100	0.00122	0.244	QLAEEDLAQQR	0.997	51.5	26.7	47.9			650.829	1299.64	2	0.752	845160
Control-1	Plectin OS=Homo sapiens GN=PLEC PE=1 SV=3	Q15149	1	90	93	100	0.00122	0.244	QLAEGTAQQR	0.997	36.8	25.3	27.8			551.286	1100.56	2	0.01639	428274
Control-1	Plectin OS=Homo sapiens GN=PLEC PE=1 SV=3	Q15149	1	90	93	100	0.00122	0.244	QLEMSAEAER	0.997	37.2	25	32.3			582.272	1162.53	2	1.288	584171
Control-1	Plectin OS=Homo sapiens GN=PLEC PE=1 SV=3	Q15149	1	90	93	100	0.00122	0.244	QLLEEELAR	0.997	47.7	27.4	34.3			550.801	1099.59	2	0.6888	1133520
Control-1	Plectin OS=Homo sapiens GN=PLEC PE=1 SV=3	Q15149	1	90	93	100	0.00122	0.244	QQEELLAEENQR	0.997	34	26.1	34			743.861	1485.71	2	0.7924	655031
Control-1	Plectin OS=Homo sapiens GN=PLEC PE=1 SV=3	Q15149	1	90	93	100	0.00122	0.244	QSSEAEIQAK	0.997	46.8	26.4	38.6			545.773	1089.53	2	0.2	314300
Control-1	Plectin OS=Homo sapiens GN=PLEC PE=1 SV=3	Q15149	1	90	93	100	0.00122	0.244	REEAAVDAQQQK	0.997	47.1	26.6	30.1			686.845	1371.68	2	0.4794	250352
Control-1	Plectin OS=Homo sapiens GN=PLEC PE=1 SV=3	Q15149	1	90	93	100	0.00122	0.244	RLEEQAAQHK	0.995	24	26.1	16.6			605.321	1208.63	2	0.7424	224701
Control-1	Plectin OS=Homo sapiens GN=PLEC PE=1 SV=3	Q15149	1	90	93	100	0.00122	0.244	RLEEQAAQHK	0.997	37.9	26.7	25.5			403.883	1208.63	3	0.4977	448003
Control-1	Plectin OS=Homo sapiens GN=PLEC PE=1 SV=3	Q15149	1	90	93	100	0.00122	0.244	RQELEAELAK	0.997	31.5	26.9	11.1			593.825	1185.64	2	0.7231	755808
Control-1	Plectin OS=Homo sapiens GN=PLEC PE=1 SV=3	Q15149	1	90	93	100	0.00122	0.244	RQHEAEEGVR	0.997	26.8	26.1	10.4			605.801	1209.59	2	1.204	80648.1
Control-1	Plectin OS=Homo sapiens GN=PLEC PE=1 SV=3	Q15149	1	90	93	100	0.00122	0.244	SDEGQLSPATR	0.997	42.3	25	34.2			580.78	1159.55	2	-0.6048	1209920
Control-1	Plectin OS=Homo sapiens GN=PLEC PE=1 SV=3	Q15149	1	90	93	100	0.00122	0.244	SKEQAELEAAR	0.997	43.5	27.7	25.6			616.318	1230.62	2	0.1933	484367
Control-1	Plectin OS=Homo sapiens GN=PLEC PE=1 SV=3	Q15149	1	90	93	100	0.00122	0.244	SLAAEEEAAR	0.997	42.6	25	32			523.759	1045.5	2	-0.3267	864857
Control-1	Plectin OS=Homo sapiens GN=PLEC PE=1 SV=3	Q15149	1	90	93	100	0.00122	0.244	SLESLHSFVAAATK	0.997	31.5	28.3	31.5			487.596	1459.77	3	-0.9022	1131960
Control-1	Plectin OS=Homo sapiens GN=PLEC PE=1 SV=3	Q15149	1	90	93	100	0.00122	0.244	SLESLHSFVAAATK	0.997	58.8	28.1	54			730.891	1459.77	2	0.4094	857163
Control-1	Plectin OS=Homo sapiens GN=PLEC PE=1 SV=3	Q15149	1	90	93	100	0.00122	0.244	SLLAWQSLR	0.997	29.5	27.1	9.76			537.308	1072.6	2	-0.542	697097
Control-1	Plectin OS=Homo sapiens GN=PLEC PE=1 SV=3	Q15149	1	90	93	100	0.00122	0.244	SMVEEGTGLR	0.997	35.2	27.2	27.1			539.764	1077.51	2	1.556	1088270
Control-1	Plectin OS=Homo sapiens GN=PLEC PE=1 SV=3	Q15149	1	90	93	100	0.00122	0.244	SNAEDTLR	0.99	27.5	25	5.11			453.22	904.426	2	0.5501	699663
Control-1	Plectin OS=Homo sapiens GN=PLEC PE=1 SV=3	Q15149	1	90	93	100	0.00122	0.244	SQVEEELFSVR	0.997	54.6	27.3	54.6			661.833	1321.65	2	-0.01659	2029650
Control-1	Plectin OS=Homo sapiens GN=PLEC PE=1 SV=3	Q15149	1	90	93	100	0.00122	0.244	SQVMDEATALQLR	0.989	83.7	27.8	80.9			731.373	1460.73	2	1.162	1374800
Control-1	Plectin OS=Homo sapiens GN=PLEC PE=1 SV=3	Q15149	1	90	93	100	0.00122	0.244	SSIAGLLLK	0.997	41.3	25	27.8			451.289	900.564	2	-0.8451	1074880
Control-1	Plectin OS=Homo sapiens GN=PLEC PE=1 SV=3	Q15149	1	90	93	100	0.00122	0.244	SSSVGSSSSYPISPAVSR	0.968	25.4	27.2	25.4			877.928	1753.84	2	-3.728	404093
Control-1	Plectin OS=Homo sapiens GN=PLEC PE=1 SV=3	Q15149	1	90	93	100	0.00122	0.244	SWSLATFR	0.981	21.3	25.8	6.15			484.253	966.492	2	-0.4361	726942
Control-1	Plectin OS=Homo sapiens GN=PLEC PE=1 SV=3	Q15149	1	90	93	100	0.00122	0.244	SYVDPSTDER	0.977	18.5	25	14.8			584.76	1167.51	2	0.546	1207080
Control-1	Plectin OS=Homo sapiens GN=PLEC PE=1 SV=3	Q15149	1	90	93	100	0.00122	0.244	TQLASWSDPTEETGPVAGILDTETLEK	0.993	40.6	28.8	40.6			963.479	2887.42	3	6.091	477152
Control-1	Plectin OS=Homo sapiens GN=PLEC PE=1 SV=3	Q15149	1	90	93	100	0.00122	0.244	VDGAEWGVDLPSVEAQLGSHR	0.997	40.8	28.1	40.8			741.366	2221.08	3	-0.6381	980385
Control-1	Plectin OS=Homo sapiens GN=PLEC PE=1 SV=3	Q15149	1	90	93	100	0.00122	0.244	VLADPSDDTK	0.997	43.2	25.9	37			530.762	1059.51	2	0.6582	1692280	P58107
Control-1	Plectin OS=Homo sapiens GN=PLEC PE=1 SV=3	Q15149	1	90	93	100	0.00122	0.244	VLALPEPSPAAPTLR	0.997	48.2	25	41.4			766.446	1530.88	2	-0.0796	1861440
Control-1	Plectin OS=Homo sapiens GN=PLEC PE=1 SV=3	Q15149	1	90	93	100	0.00122	0.244	VPLDVAcAR	0.997	27.4	26	24.4	c7: Carbamidomethyl (+57.02)		500.767	999.519	2	2.152	1225950
Control-1	Plectin OS=Homo sapiens GN=PLEC PE=1 SV=3	Q15149	1	90	93	100	0.00122	0.244	VPVDVAYQR	0.997	28.9	28.1	28.9			523.786	1045.56	2	1.259	2491590
Control-1	Plectin OS=Homo sapiens GN=PLEC PE=1 SV=3	Q15149	1	90	93	100	0.00122	0.244	VPVDVAYR	0.99	25.4	27.4	25.4			459.755	917.496	2	-0.9602	1222280	P58107
Control-1	Plectin OS=Homo sapiens GN=PLEC PE=1 SV=3	Q15149	1	90	93	100	0.00122	0.244	VTLVQTLEIQR	0.997	60.9	25	52.8			650.385	1298.76	2	0.07544	1593240
Control-1	Plectin OS=Homo sapiens GN=PLEC PE=1 SV=3	Q15149	1	90	93	100	0.00122	0.244	YLQDLLAWVEENQHR	0.997	38	27.9	26.1			638.656	1912.95	3	1.422	595203
Control-1	Echinoderm microtubule-associated protein-like 4 OS=Homo sapiens GN=EML4 PE=1 SV=3	Q9HC35	1	2	2	2	2.44e-05	0.0214	AALADVLR	0.99	47.1	25	24.8			414.751	827.487	2	0.6253	495729
Control-1	Echinoderm microtubule-associated protein-like 4 OS=Homo sapiens GN=EML4 PE=1 SV=3	Q9HC35	1	2	2	2	2.44e-05	0.0214	KPSHTSAVSIAGK	0.985	20.5	25.2	8.21			428.242	1281.7	3	0.5161	475011
Control-1	Hexokinase-1 OS=Homo sapiens GN=HK1 PE=1 SV=3	P19367	1	5	5	6	7.32e-05	0.0872	AAQLcGAGMAAVVDK	0.997	68	27.4	65.5	c5: Carbamidomethyl (+57.02)		731.364	1460.71	2	1.021	797467
Control-1	Hexokinase-1 OS=Homo sapiens GN=HK1 PE=1 SV=3	P19367	1	5	5	6	7.32e-05	0.0872	FLSQIESDR	0.997	29.2	27.3	25.7			547.778	1093.54	2	1.478	1146850	Q2TB90
Control-1	Hexokinase-1 OS=Homo sapiens GN=HK1 PE=1 SV=3	P19367	1	5	5	6	7.32e-05	0.0872	GDFIALDLGGSSFR	0.997	40.1	27.2	40.1			727.867	1453.72	2	-0.455	777340
Control-1	Hexokinase-1 OS=Homo sapiens GN=HK1 PE=1 SV=3	P19367	1	5	5	6	7.32e-05	0.0872	LGVEPSDDDcVSVQHVcTIVSFR	0.997	39.3	26.6	39.3	c10: Carbamidomethyl (+57.02), c17: Carbamidomethyl (+57.02)		873.745	2618.21	3	1.356	872605
Control-1	Hexokinase-1 OS=Homo sapiens GN=HK1 PE=1 SV=3	P19367	1	5	5	6	7.32e-05	0.0872	LVDEYSLNAGK	0.992	25.2	27.1	25.2			604.813	1207.61	2	1.852	1348260
Control-1	Hexokinase-1 OS=Homo sapiens GN=HK1 PE=1 SV=3	P19367	1	5	5	6	7.32e-05	0.0872	TVcGVVSR	0.99	24.5	27.8	17.5	c3: Carbamidomethyl (+57.02)		439.232	876.449	2	0.3108	746003
Control-1	Catechol O-methyltransferase OS=Homo sapiens GN=COMT PE=1 SV=2	P21964	1	3	3	3	3.66e-05	0.144	GTVLLADNVIcPGAPDFLAHVR	0.997	37.3	27.2	31.8	c11: Carbamidomethyl (+57.02)		779.079	2334.22	3	0.2855	904136
Control-1	Catechol O-methyltransferase OS=Homo sapiens GN=COMT PE=1 SV=2	P21964	1	3	3	3	3.66e-05	0.144	KGTVLLADNVIcPGAPDFLAHVR	0.997	34.1	25.7	34.1	c12: Carbamidomethyl (+57.02)		616.585	2462.31	4	-0.09712	901396
Control-1	Catechol O-methyltransferase OS=Homo sapiens GN=COMT PE=1 SV=2	P21964	1	3	3	3	3.66e-05	0.144	LITIEINPDcAAITQR	0.997	46.6	26.6	37.7	c10: Carbamidomethyl (+57.02)		914.487	1826.96	2	1.572	873437
Control-1	Phosphoglucomutase-like protein 5 OS=Homo sapiens GN=PGM5 PE=1 SV=2	Q15124	1	16	18	19	0.000232	0.397	cNLcGEESFGTGSDHLR	0.997	30.4	25	30.4	c1: Carbamidomethyl (+57.02), c4: Carbamidomethyl (+57.02)		646.94	1937.8	3	-0.6543	2342450
Control-1	Phosphoglucomutase-like protein 5 OS=Homo sapiens GN=PGM5 PE=1 SV=2	Q15124	1	16	18	19	0.000232	0.397	DLEALVTDK	0.997	27.1	26.3	11.6			502.269	1002.52	2	0.3369	2783090
Control-1	Phosphoglucomutase-like protein 5 OS=Homo sapiens GN=PGM5 PE=1 SV=2	Q15124	1	16	18	19	0.000232	0.397	FNVANGGPAPDVVSDK	0.997	65.8	27.6	57.7			793.894	1585.77	2	-0.6818	974171
Control-1	Phosphoglucomutase-like protein 5 OS=Homo sapiens GN=PGM5 PE=1 SV=2	Q15124	1	16	18	19	0.000232	0.397	GGEYGFGAAFDADGDR	0.997	33.6	25	33.6			802.833	1603.65	2	-1.073	797662
Control-1	Phosphoglucomutase-like protein 5 OS=Homo sapiens GN=PGM5 PE=1 SV=2	Q15124	1	16	18	19	0.000232	0.397	GGEYGFGAAFDADGDR	0.997	52.1	25	52.1			802.835	1603.66	2	0.8962	786730
Control-1	Phosphoglucomutase-like protein 5 OS=Homo sapiens GN=PGM5 PE=1 SV=2	Q15124	1	16	18	19	0.000232	0.397	IDAMHGVMGPYVR	0.997	32.1	26.4	32.1			482.572	1444.69	3	-0.7456	1153540
Control-1	Phosphoglucomutase-like protein 5 OS=Homo sapiens GN=PGM5 PE=1 SV=2	Q15124	1	16	18	19	0.000232	0.397	IDAMHGVMGPYVR	0.997	41.8	26.5	37.8			723.355	1444.7	2	-0.4302	1116900
Control-1	Phosphoglucomutase-like protein 5 OS=Homo sapiens GN=PGM5 PE=1 SV=2	Q15124	1	16	18	19	0.000232	0.397	IIFSDASR	0.99	37	26.3	21.1			454.746	907.477	2	0.7243	1243200
Control-1	Phosphoglucomutase-like protein 5 OS=Homo sapiens GN=PGM5 PE=1 SV=2	Q15124	1	16	18	19	0.000232	0.397	KQSVEEIVR	0.997	32.3	26.5	18.2			544.309	1086.6	2	-0.2225	808082
Control-1	Phosphoglucomutase-like protein 5 OS=Homo sapiens GN=PGM5 PE=1 SV=2	Q15124	1	16	18	19	0.000232	0.397	LIIGQNGILSTPAVScIIR	0.982	24.7	25	21.4	c16: Carbamidomethyl (+57.02)		1013.08	2024.14	2	-2.374	473457
Control-1	Phosphoglucomutase-like protein 5 OS=Homo sapiens GN=PGM5 PE=1 SV=2	Q15124	1	16	18	19	0.000232	0.397	LYAESYERDPSGHDQEPQAVLSPLIAIALK	0.996	31.1	26.8	31.1			1104.23	3309.68	3	-2.162	331540
Control-1	Phosphoglucomutase-like protein 5 OS=Homo sapiens GN=PGM5 PE=1 SV=2	Q15124	1	16	18	19	0.000232	0.397	QEFDLENK	0.99	41.5	25	29.9			511.743	1021.47	2	0.6045	2363640
Control-1	Phosphoglucomutase-like protein 5 OS=Homo sapiens GN=PGM5 PE=1 SV=2	Q15124	1	16	18	19	0.000232	0.397	QGcTMVVGSDGR	0.997	69.6	25	68.2	c3: Carbamidomethyl (+57.02)		633.782	1265.55	2	0.6575	736185
Control-1	Phosphoglucomutase-like protein 5 OS=Homo sapiens GN=PGM5 PE=1 SV=2	Q15124	1	16	18	19	0.000232	0.397	SFIGQQFAVGSHVYSVAK	0.993	30.2	28.2	28.8			642.334	1923.98	3	-2.721	1487980
Control-1	Phosphoglucomutase-like protein 5 OS=Homo sapiens GN=PGM5 PE=1 SV=2	Q15124	1	16	18	19	0.000232	0.397	SFIGQQFAVGSHVYSVAK	0.997	41.4	28	41.4			963	1923.98	2	0.1652	470176
Control-1	Phosphoglucomutase-like protein 5 OS=Homo sapiens GN=PGM5 PE=1 SV=2	Q15124	1	16	18	19	0.000232	0.397	SMPTSMALDR	0.997	29.2	25	24.9			554.761	1107.51	2	1.297	2430630
Control-1	Phosphoglucomutase-like protein 5 OS=Homo sapiens GN=PGM5 PE=1 SV=2	Q15124	1	16	18	19	0.000232	0.397	TDSFEYVDPVDGTVTKK	0.997	30.2	27.5	30.2			634.311	1899.91	3	-0.1515	1568600
Control-1	Phosphoglucomutase-like protein 5 OS=Homo sapiens GN=PGM5 PE=1 SV=2	Q15124	1	16	18	19	0.000232	0.397	TIEEYAIcPDLR	0.997	49.5	27.2	41.2	c8: Carbamidomethyl (+57.02)		740.361	1478.71	2	-0.1671	1406790
Control-1	Phosphoglucomutase-like protein 5 OS=Homo sapiens GN=PGM5 PE=1 SV=2	Q15124	1	16	18	19	0.000232	0.397	VPVYETPAGWR	0.997	61.3	27.6	53.3			637.83	1273.65	2	-0.1584	1408050
Control-1	Astrocytic phosphoprotein PEA-15 OS=Homo sapiens GN=PEA15 PE=1 SV=2	Q15121	1	2	2	2	2.44e-05	0.177	RPDLLTMVVDYR	0.997	38.2	28	36.6			493.266	1476.78	3	-0.1339	398364
Control-1	Astrocytic phosphoprotein PEA-15 OS=Homo sapiens GN=PEA15 PE=1 SV=2	Q15121	1	2	2	2	2.44e-05	0.177	SAcKEDIPSEK	0.991	24.1	25.2	8.2	c3: Carbamidomethyl (+57.02)		632.299	1262.58	2	2.099	179078
Control-1	ADP/ATP translocase 2 OS=Homo sapiens GN=SLC25A5 PE=1 SV=7	P05141	1	3	3	10	0.000122	0.339	DFLAGGVAAAISK	0.997	43.5	26.2	39.3			610.337	1218.66	2	-1.494	716447
Control-1	ADP/ATP translocase 2 OS=Homo sapiens GN=SLC25A5 PE=1 SV=7	P05141	1	3	3	10	0.000122	0.339	EQGVLSFWR	0.997	34.1	27.6	24.3			561.29	1120.57	2	-0.1622	971238	P12236
Control-1	ADP/ATP translocase 2 OS=Homo sapiens GN=SLC25A5 PE=1 SV=7	P05141	1	3	3	10	0.000122	0.339	GAWSNVLR	0.99	29.4	25.2	23.2			451.746	901.477	2	0.1308	1224480	P12236,P12235
Control-1	ADP/ATP translocase 2 OS=Homo sapiens GN=SLC25A5 PE=1 SV=7	P05141	1	3	3	10	0.000122	0.339	GLGDcLVK	0.973	19.5	27.9	13	c5: Carbamidomethyl (+57.02)		431.229	860.443	2	-0.2638	1604820	P12236
Control-1	ADP/ATP translocase 2 OS=Homo sapiens GN=SLC25A5 PE=1 SV=7	P05141	1	3	3	10	0.000122	0.339	GNLANVIR	0.99	24.5	25	11.9			428.754	855.493	2	0.3246	1693730	Q9H0C2,P12236,P12235
Control-1	ADP/ATP translocase 2 OS=Homo sapiens GN=SLC25A5 PE=1 SV=7	P05141	1	3	3	10	0.000122	0.339	KGTDIMYTGTLDcWR	0.997	37.5	25.6	31.6	c13: Carbamidomethyl (+57.02)		606.283	1815.83	3	-0.5302	1194610
Control-1	ADP/ATP translocase 2 OS=Homo sapiens GN=SLC25A5 PE=1 SV=7	P05141	1	3	3	10	0.000122	0.339	LLLQVQHASK	0.997	26.4	25	19.8			379.565	1135.67	3	0.4681	2580100	P12236,P12235
Control-1	ADP/ATP translocase 2 OS=Homo sapiens GN=SLC25A5 PE=1 SV=7	P05141	1	3	3	10	0.000122	0.339	QIFLGGVDKR	0.995	24.8	26.2	18.8			378.221	1131.64	3	-0.4749	847654
Control-1	ADP/ATP translocase 2 OS=Homo sapiens GN=SLC25A5 PE=1 SV=7	P05141	1	3	3	10	0.000122	0.339	TAVAPIER	0.988	21.6	25	13.6			428.748	855.481	2	-0.2124	1739350	Q9H0C2,P12236,P12235
Control-1	ADP/ATP translocase 2 OS=Homo sapiens GN=SLC25A5 PE=1 SV=7	P05141	1	3	3	10	0.000122	0.339	YFPTQALNFAFK	0.997	27.5	28	27.5			723.874	1445.73	2	-0.5267	791478	Q9H0C2,P12236,P12235
Control-1	Collagen alpha-1(IV) chain OS=Homo sapiens GN=COL4A1 PE=1 SV=3	P02462	1	13	20	25	0.000305	0.137	AHGQDLGTAGScLR	0.997	49.3	25.9	46.1	c12: Carbamidomethyl (+57.02)		721.845	1441.68	2	1.187	1114470	P29400
Control-1	Collagen alpha-1(IV) chain OS=Homo sapiens GN=COL4A1 PE=1 SV=3	P02462	1	13	20	25	0.000305	0.137	AHGQDLGTAGScLR	0.997	41.7	26	41.7	c12: Carbamidomethyl (+57.02)		481.565	1441.67	3	0.06707	2747930	P29400
Control-1	Collagen alpha-1(IV) chain OS=Homo sapiens GN=COL4A1 PE=1 SV=3	P02462	1	13	20	25	0.000305	0.137	AHGQDLGTAGScLRK	0.971	24.3	27.4	24.3	c12: Carbamidomethyl (+57.02)		524.262	1569.77	3	-1.855	542295
Control-1	Collagen alpha-1(IV) chain OS=Homo sapiens GN=COL4A1 PE=1 SV=3	P02462	1	13	20	25	0.000305	0.137	GDpGTPGVPGK	0.966	17	25	12.8		p3: Oxidation (+15.99)	499.251	996.488	2	-0.03704	1113290
Control-1	Collagen alpha-1(IV) chain OS=Homo sapiens GN=COL4A1 PE=1 SV=3	P02462	1	13	20	25	0.000305	0.137	GEpGppGLpGSVGSpGVpGIGPpGAR	0.997	33.6	27.9	0.24		p3: Oxidation (+15.99), p5: Oxidation (+15.99), p6: Oxidation (+15.99), p9: Oxidation (+15.99), p15: Oxidation (+15.99), p18: Oxidation (+15.99), p23: Oxidation (+15.99)	1188.08	2374.14	2	-1.519	417195
Control-1	Collagen alpha-1(IV) chain OS=Homo sapiens GN=COL4A1 PE=1 SV=3	P02462	1	13	20	25	0.000305	0.137	GFPGppGpDGLpGSMGpPGTPSVDHGFLVTR	0.985	22.7	26.7	6		p5: Oxidation (+15.99), p6: Oxidation (+15.99), p8: Oxidation (+15.99), p12: Oxidation (+15.99), p17: Oxidation (+15.99)	1027.49	3079.43	3	-0.5658	743668
Control-1	Collagen alpha-1(IV) chain OS=Homo sapiens GN=COL4A1 PE=1 SV=3	P02462	1	13	20	25	0.000305	0.137	GFPGppGpDGLpGSmGppGTPSVDHGFLVTR	0.997	33.8	26.7	7.93		p5: Oxidation (+15.99), p6: Oxidation (+15.99), p8: Oxidation (+15.99), p12: Oxidation (+15.99), m15: Oxidation (+15.99), p17: Oxidation (+15.99), p18: Oxidation (+15.99)	1038.15	3111.43	3	1.728	1659390
Control-1	Collagen alpha-1(IV) chain OS=Homo sapiens GN=COL4A1 PE=1 SV=3	P02462	1	13	20	25	0.000305	0.137	GFpGTSLPGpSGR	0.967	23.6	26.4	0		p3: Oxidation (+15.99), p10: Oxidation (+15.99)	631.311	1260.61	2	-1.944	1388230
Control-1	Collagen alpha-1(IV) chain OS=Homo sapiens GN=COL4A1 PE=1 SV=3	P02462	1	13	20	25	0.000305	0.137	GFpGTSLPGPSGR	0.997	34.4	26.8	32.2		p3: Oxidation (+15.99)	623.316	1244.62	2	2.266	1498190
Control-1	Collagen alpha-1(IV) chain OS=Homo sapiens GN=COL4A1 PE=1 SV=3	P02462	1	13	20	25	0.000305	0.137	GFpGTSLpGPSGR	0.997	27	26.6	1.93		p3: Oxidation (+15.99), p8: Oxidation (+15.99)	631.313	1260.61	2	0.371	3131100
Control-1	Collagen alpha-1(IV) chain OS=Homo sapiens GN=COL4A1 PE=1 SV=3	P02462	1	13	20	25	0.000305	0.137	GPpGGVGFpGSR	0.997	42.4	25.4	14.7		p3: Oxidation (+15.99), p9: Oxidation (+15.99)	558.776	1115.54	2	0.3475	1444450
Control-1	Collagen alpha-1(IV) chain OS=Homo sapiens GN=COL4A1 PE=1 SV=3	P02462	1	13	20	25	0.000305	0.137	GYpGTpGPR	0.997	26.2	25	6.69		p3: Oxidation (+15.99), p6: Oxidation (+15.99)	467.225	932.435	2	-0.9127	488431
Control-1	Collagen alpha-1(IV) chain OS=Homo sapiens GN=COL4A1 PE=1 SV=3	P02462	1	13	20	25	0.000305	0.137	HSQTIDDPQcPSGTK	0.997	33.5	25	32.3	c10: Carbamidomethyl (+57.02)		557.586	1669.74	3	-0.4568	642077
Control-1	Collagen alpha-1(IV) chain OS=Homo sapiens GN=COL4A1 PE=1 SV=3	P02462	1	13	20	25	0.000305	0.137	ILYHGYSLLYVQGNER	0.992	58.8	28.2	53.1			963.003	1923.99	2	3.48	409634
Control-1	Collagen alpha-1(IV) chain OS=Homo sapiens GN=COL4A1 PE=1 SV=3	P02462	1	13	20	25	0.000305	0.137	ILYHGYSLLYVQGNER	0.997	30.9	28	23.9			642.336	1923.99	3	0.3595	2660200
Control-1	Collagen alpha-1(IV) chain OS=Homo sapiens GN=COL4A1 PE=1 SV=3	P02462	1	13	20	25	0.000305	0.137	IVPLPGppGAEGLpGSpGFpGPQGDR	0.991	24.4	28	24.4		p7: Oxidation (+15.99), p8: Oxidation (+15.99), p14: Oxidation (+15.99), p17: Oxidation (+15.99), p20: Oxidation (+15.99)	849.423	2545.25	3	0.8982	867350
Control-1	Collagen alpha-1(IV) chain OS=Homo sapiens GN=COL4A1 PE=1 SV=3	P02462	1	13	20	25	0.000305	0.137	IVPLPGPpGAEGLpGSpGFpGPQGDR	0.997	40.9	28.2	33.8		p8: Oxidation (+15.99), p14: Oxidation (+15.99), p17: Oxidation (+15.99), p20: Oxidation (+15.99)	1265.64	2529.26	2	1.912	263726
Control-1	Collagen alpha-1(IV) chain OS=Homo sapiens GN=COL4A1 PE=1 SV=3	P02462	1	13	20	25	0.000305	0.137	KPTPSTLK	0.987	21.1	25	2.81			436.266	870.518	2	0.06662	386289
Control-1	Collagen alpha-1(IV) chain OS=Homo sapiens GN=COL4A1 PE=1 SV=3	P02462	1	13	20	25	0.000305	0.137	KPTPSTLk	0.99	25	25.8	14		k8: Oxidation (+15.99)	444.263	886.512	2	-0.1768	871122
Control-1	Collagen alpha-1(IV) chain OS=Homo sapiens GN=COL4A1 PE=1 SV=3	P02462	1	13	20	25	0.000305	0.137	KPTPSTLkAGELR	0.997	32.4	25	19.6		k8: Oxidation (+15.99)	707.408	1412.8	2	2.294	275319
Control-1	Collagen alpha-1(IV) chain OS=Homo sapiens GN=COL4A1 PE=1 SV=3	P02462	1	13	20	25	0.000305	0.137	KPTPSTLkAGELR	0.997	46.8	25.4	24.7		k8: Oxidation (+15.99)	471.94	1412.8	3	-0.766	1279760
Control-1	Collagen alpha-1(IV) chain OS=Homo sapiens GN=COL4A1 PE=1 SV=3	P02462	1	13	20	25	0.000305	0.137	NDYSYWLSTPEPmPmSmAPITGENIRPFISR	0.968	19	26.4	1.19		m13: Oxidation (+15.99), m15: Oxidation (+15.99), m17: Oxidation (+15.99)	1216.9	3647.68	3	1.345	384789
Control-1	Collagen alpha-1(IV) chain OS=Homo sapiens GN=COL4A1 PE=1 SV=3	P02462	1	13	20	25	0.000305	0.137	NDYSYWLSTPEPMpMSmAPITGENIRPFISR	0.969	18.5	26.6	0.74		p14: Oxidation (+15.99), m17: Oxidation (+15.99)	1211.57	3631.68	3	0.92	427923
Control-1	Collagen alpha-1(IV) chain OS=Homo sapiens GN=COL4A1 PE=1 SV=3	P02462	1	13	20	25	0.000305	0.137	SAPFIEcHGR	0.986	20.6	25	0	c7: Carbamidomethyl (+57.02)		391.854	1172.54	3	0.2188	1333790	P29400
Control-1	Collagen alpha-1(IV) chain OS=Homo sapiens GN=COL4A1 PE=1 SV=3	P02462	1	13	20	25	0.000305	0.137	SAPFIEcHGR	0.987	21.5	25	0	c7: Carbamidomethyl (+57.02)		587.277	1172.54	2	-0.1766	1089340	P29400
Control-1	Collagen alpha-1(III) chain OS=Homo sapiens GN=COL3A1 PE=1 SV=4	P02461	1	70	174	269	0.00328	0.581	DGESGRPGRpGER	0.997	39	25	9.83		p10: Oxidation (+15.99)	693.33	1384.65	2	0.4785	2726750
Control-1	Collagen alpha-1(III) chain OS=Homo sapiens GN=COL3A1 PE=1 SV=4	P02461	1	70	174	269	0.00328	0.581	DGNpGSDGLpGR	0.991	22.6	25	22.6		p4: Oxidation (+15.99), p10: Oxidation (+15.99)	587.26	1172.51	2	0.09207	932491
Control-1	Collagen alpha-1(III) chain OS=Homo sapiens GN=COL3A1 PE=1 SV=4	P02461	1	70	174	269	0.00328	0.581	DGNpGSDGLpGR	0.997	65.5	25	63.6		p4: Oxidation (+15.99), p10: Oxidation (+15.99)	587.26	1172.51	2	0.1943	4998530
Control-1	Collagen alpha-1(III) chain OS=Homo sapiens GN=COL3A1 PE=1 SV=4	P02461	1	70	174	269	0.00328	0.581	DGNpGSDGLpGR	0.997	25.6	25	25.6		p4: Oxidation (+15.99), p10: Oxidation (+15.99)	587.261	1172.51	2	0.3988	995624
Control-1	Collagen alpha-1(III) chain OS=Homo sapiens GN=COL3A1 PE=1 SV=4	P02461	1	70	174	269	0.00328	0.581	DGNpGSDGLpGR	0.997	33.8	25	32.9		p4: Oxidation (+15.99), p10: Oxidation (+15.99)	587.261	1172.51	2	0.6034	503234
Control-1	Collagen alpha-1(III) chain OS=Homo sapiens GN=COL3A1 PE=1 SV=4	P02461	1	70	174	269	0.00328	0.581	DGNpGSDGLPGRDGSpGGk	0.975	18.3	25	2.45		p4: Oxidation (+15.99), p16: Oxidation (+15.99), k19: Oxidation (+15.99)	596.599	1786.77	3	0.7758	318918
Control-1	Collagen alpha-1(III) chain OS=Homo sapiens GN=COL3A1 PE=1 SV=4	P02461	1	70	174	269	0.00328	0.581	DGNpGSDGLpGRDGSPGGk	0.983	20.1	25	0		p4: Oxidation (+15.99), p10: Oxidation (+15.99), k19: Oxidation (+15.99)	596.598	1786.77	3	0.05428	494124
Control-1	Collagen alpha-1(III) chain OS=Homo sapiens GN=COL3A1 PE=1 SV=4	P02461	1	70	174	269	0.00328	0.581	DGNpGSDGLpGRDGSpGGK	0.997	48.6	25	2.84		p4: Oxidation (+15.99), p10: Oxidation (+15.99), p16: Oxidation (+15.99)	894.393	1786.77	2	0.06323	93113.5
Control-1	Collagen alpha-1(III) chain OS=Homo sapiens GN=COL3A1 PE=1 SV=4	P02461	1	70	174	269	0.00328	0.581	DGNpGSDGLpGRDGSpGGKGDR	0.986	21.1	25	4.08		p4: Oxidation (+15.99), p10: Oxidation (+15.99), p16: Oxidation (+15.99)	529.738	2114.92	4	-0.2736	448632
Control-1	Collagen alpha-1(III) chain OS=Homo sapiens GN=COL3A1 PE=1 SV=4	P02461	1	70	174	269	0.00328	0.581	DGPPGpAGNTGApGSpGVSGPK	0.976	70.2	26.7	26.5		p6: Oxidation (+15.99), p13: Oxidation (+15.99), p16: Oxidation (+15.99)	961.452	1920.89	2	4.19	201475
Control-1	Collagen alpha-1(III) chain OS=Homo sapiens GN=COL3A1 PE=1 SV=4	P02461	1	70	174	269	0.00328	0.581	DGPPGpAGNTGApGSpGVSGPK	0.997	60.9	26.2	31.6		p6: Oxidation (+15.99), p13: Oxidation (+15.99), p16: Oxidation (+15.99)	961.448	1920.88	2	0.2565	220820
Control-1	Collagen alpha-1(III) chain OS=Homo sapiens GN=COL3A1 PE=1 SV=4	P02461	1	70	174	269	0.00328	0.581	DGPPGpAGNTGApGSpGVSGPK	0.997	51.5	26.2	25.1		p6: Oxidation (+15.99), p13: Oxidation (+15.99), p16: Oxidation (+15.99)	961.448	1920.88	2	-0.1285	211608
Control-1	Collagen alpha-1(III) chain OS=Homo sapiens GN=COL3A1 PE=1 SV=4	P02461	1	70	174	269	0.00328	0.581	DGPpGpAGNTGApGSpGVSGPK	0.997	42.5	25.7	21.5		p4: Oxidation (+15.99), p6: Oxidation (+15.99), p13: Oxidation (+15.99), p16: Oxidation (+15.99)	969.446	1936.88	2	0.4118	108316
Control-1	Collagen alpha-1(III) chain OS=Homo sapiens GN=COL3A1 PE=1 SV=4	P02461	1	70	174	269	0.00328	0.581	DGPPGpAGNTGApGSpGVSGPK	0.997	38.5	26.2	28.5		p6: Oxidation (+15.99), p13: Oxidation (+15.99), p16: Oxidation (+15.99)	641.302	1920.88	3	0.7581	7008440
Control-1	Collagen alpha-1(III) chain OS=Homo sapiens GN=COL3A1 PE=1 SV=4	P02461	1	70	174	269	0.00328	0.581	DGPPGpAGNTGApGSpGVSGpKGDAGQPGEK	0.984	21	25.5	13		p6: Oxidation (+15.99), p13: Oxidation (+15.99), p16: Oxidation (+15.99), p21: Oxidation (+15.99)	926.425	2776.25	3	-0.1037	422547
Control-1	Collagen alpha-1(III) chain OS=Homo sapiens GN=COL3A1 PE=1 SV=4	P02461	1	70	174	269	0.00328	0.581	DGPPGpAGNTGApGSpGVSGpkGDAGQPGEK	0.997	26.1	25.2	26.1		p6: Oxidation (+15.99), p13: Oxidation (+15.99), p16: Oxidation (+15.99), p21: Oxidation (+15.99), k22: Oxidation (+15.99)	931.758	2792.25	3	1.048	216269
Control-1	Collagen alpha-1(III) chain OS=Homo sapiens GN=COL3A1 PE=1 SV=4	P02461	1	70	174	269	0.00328	0.581	DGSpGEpGANGLpGAAGER	0.984	20.6	25	20.6		p4: Oxidation (+15.99), p7: Oxidation (+15.99), p13: Oxidation (+15.99)	586.263	1755.77	3	-0.144	625566
Control-1	Collagen alpha-1(III) chain OS=Homo sapiens GN=COL3A1 PE=1 SV=4	P02461	1	70	174	269	0.00328	0.581	DGSpGEpGANGLpGAAGER	0.997	62.9	25	62.9		p4: Oxidation (+15.99), p7: Oxidation (+15.99), p13: Oxidation (+15.99)	878.891	1755.77	2	1.123	427617
Control-1	Collagen alpha-1(III) chain OS=Homo sapiens GN=COL3A1 PE=1 SV=4	P02461	1	70	174	269	0.00328	0.581	DGSPGGkGDRGENGSpGApGApGHpGPPGPVGPAGK	0.969	17.7	25.9	8.8		k7: Oxidation (+15.99), p16: Oxidation (+15.99), p19: Oxidation (+15.99), p22: Oxidation (+15.99), p25: Oxidation (+15.99)	806.376	3221.47	4	0.01583	374279
Control-1	Collagen alpha-1(III) chain OS=Homo sapiens GN=COL3A1 PE=1 SV=4	P02461	1	70	174	269	0.00328	0.581	DGSPGGkGDRGENGSpGApGApGHpGpPGPVGPAGK	0.997	33.5	25.7	33.5		k7: Oxidation (+15.99), p16: Oxidation (+15.99), p19: Oxidation (+15.99), p22: Oxidation (+15.99), p25: Oxidation (+15.99), p27: Oxidation (+15.99)	1080.17	3237.48	3	2.777	90886.8
Control-1	Collagen alpha-1(III) chain OS=Homo sapiens GN=COL3A1 PE=1 SV=4	P02461	1	70	174	269	0.00328	0.581	DGSPGGkGDRGENGSpGApGApGHpGpPGPVGPAGK	0.997	41.3	25.3	37.6		k7: Oxidation (+15.99), p16: Oxidation (+15.99), p19: Oxidation (+15.99), p22: Oxidation (+15.99), p25: Oxidation (+15.99), p27: Oxidation (+15.99)	810.374	3237.47	4	0.07905	708173
Control-1	Collagen alpha-1(III) chain OS=Homo sapiens GN=COL3A1 PE=1 SV=4	P02461	1	70	174	269	0.00328	0.581	DGTSGHPGPIGpPGpR	0.988	21.6	25.5	0.3		p12: Oxidation (+15.99), p15: Oxidation (+15.99)	510.915	1529.72	3	0.7983	891843
Control-1	Collagen alpha-1(III) chain OS=Homo sapiens GN=COL3A1 PE=1 SV=4	P02461	1	70	174	269	0.00328	0.581	DGTSGHPGPIGPpGPR	0.989	22.8	26.3	3.93		p13: Oxidation (+15.99)	505.583	1513.73	3	-0.2066	1357300
Control-1	Collagen alpha-1(III) chain OS=Homo sapiens GN=COL3A1 PE=1 SV=4	P02461	1	70	174	269	0.00328	0.581	DGTSGHPGPIGPpGPR	0.989	22.8	26.3	0.29		p13: Oxidation (+15.99)	505.583	1513.73	3	-0.02836	1553970
Control-1	Collagen alpha-1(III) chain OS=Homo sapiens GN=COL3A1 PE=1 SV=4	P02461	1	70	174	269	0.00328	0.581	DGTSGHPGpIGpPGpR	0.997	34.5	25.4	7.56		p9: Oxidation (+15.99), p12: Oxidation (+15.99), p15: Oxidation (+15.99)	516.246	1545.72	3	-0.9911	808654
Control-1	Collagen alpha-1(III) chain OS=Homo sapiens GN=COL3A1 PE=1 SV=4	P02461	1	70	174	269	0.00328	0.581	DGTSGHpGPIGppGPR	0.997	45.1	25.4	9.14		p7: Oxidation (+15.99), p12: Oxidation (+15.99), p13: Oxidation (+15.99)	516.247	1545.72	3	1.142	2214820
Control-1	Collagen alpha-1(III) chain OS=Homo sapiens GN=COL3A1 PE=1 SV=4	P02461	1	70	174	269	0.00328	0.581	DGTSGHpGPIGPPGpR	0.997	46.3	25.8	10.3		p7: Oxidation (+15.99), p15: Oxidation (+15.99)	510.915	1529.72	3	-0.1032	2047000
Control-1	Collagen alpha-1(III) chain OS=Homo sapiens GN=COL3A1 PE=1 SV=4	P02461	1	70	174	269	0.00328	0.581	DGTSGHpGPIGPpGPR	0.997	41.9	25.6	6.53		p7: Oxidation (+15.99), p13: Oxidation (+15.99)	765.869	1529.72	2	0.4364	8313960
Control-1	Collagen alpha-1(III) chain OS=Homo sapiens GN=COL3A1 PE=1 SV=4	P02461	1	70	174	269	0.00328	0.581	DGTSGHpGPIGppGPR	0.997	33.7	25.2	0		p7: Oxidation (+15.99), p12: Oxidation (+15.99), p13: Oxidation (+15.99)	773.867	1545.72	2	0.7196	186081
Control-1	Collagen alpha-1(III) chain OS=Homo sapiens GN=COL3A1 PE=1 SV=4	P02461	1	70	174	269	0.00328	0.581	DGTSGHpGPIGPpGPR	0.997	36.8	25.9	5.5		p7: Oxidation (+15.99), p13: Oxidation (+15.99)	510.914	1529.72	3	-1.044	886155
Control-1	Collagen alpha-1(III) chain OS=Homo sapiens GN=COL3A1 PE=1 SV=4	P02461	1	70	174	269	0.00328	0.581	DGVpGGPGmR	0.975	18.6	25	1.62		p4: Oxidation (+15.99), m9: Oxidation (+15.99)	487.722	973.429	2	-0.07385	1550750
Control-1	Collagen alpha-1(III) chain OS=Homo sapiens GN=COL3A1 PE=1 SV=4	P02461	1	70	174	269	0.00328	0.581	DGVpGGPGmR	0.996	25.5	25	2.38		p4: Oxidation (+15.99), m9: Oxidation (+15.99)	487.721	973.428	2	-1.08	681141
Control-1	Collagen alpha-1(III) chain OS=Homo sapiens GN=COL3A1 PE=1 SV=4	P02461	1	70	174	269	0.00328	0.581	GAAGEpGRDGVpGGPGmR	0.985	20.7	25	3.84		p6: Oxidation (+15.99), p12: Oxidation (+15.99), m17: Oxidation (+15.99)	562.594	1684.76	3	-0.03142	614514
Control-1	Collagen alpha-1(III) chain OS=Homo sapiens GN=COL3A1 PE=1 SV=4	P02461	1	70	174	269	0.00328	0.581	GAAGEpGRDGVpGGpGmR	0.997	25.7	25	25.7		p6: Oxidation (+15.99), p12: Oxidation (+15.99), p15: Oxidation (+15.99), m17: Oxidation (+15.99)	567.926	1700.76	3	1.188	418135
Control-1	Collagen alpha-1(III) chain OS=Homo sapiens GN=COL3A1 PE=1 SV=4	P02461	1	70	174	269	0.00328	0.581	GAAGEpGRDGVpGGpGmR	0.997	28.9	25	28.9		p6: Oxidation (+15.99), p12: Oxidation (+15.99), p15: Oxidation (+15.99), m17: Oxidation (+15.99)	567.925	1700.75	3	-0.5218	2167000
Control-1	Collagen alpha-1(III) chain OS=Homo sapiens GN=COL3A1 PE=1 SV=4	P02461	1	70	174	269	0.00328	0.581	GAAGEpGRDGVpGGPGmR	0.997	31.9	25	6.65		p6: Oxidation (+15.99), p12: Oxidation (+15.99), m17: Oxidation (+15.99)	562.594	1684.76	3	0.2889	1363010
Control-1	Collagen alpha-1(III) chain OS=Homo sapiens GN=COL3A1 PE=1 SV=4	P02461	1	70	174	269	0.00328	0.581	GAAGPpGPpGAAGTpGLQGmpGER	0.994	51.2	26.2	0		p6: Oxidation (+15.99), p9: Oxidation (+15.99), p15: Oxidation (+15.99), m20: Oxidation (+15.99), p21: Oxidation (+15.99)	1090.51	2179	2	3.011	120234
Control-1	Collagen alpha-1(III) chain OS=Homo sapiens GN=COL3A1 PE=1 SV=4	P02461	1	70	174	269	0.00328	0.581	GAAGPpGPpGAAGTpGLQGMpGER	0.995	48.9	26.2	7.76		p6: Oxidation (+15.99), p9: Oxidation (+15.99), p15: Oxidation (+15.99), p21: Oxidation (+15.99)	1082.51	2163	2	-2.136	415312
Control-1	Collagen alpha-1(III) chain OS=Homo sapiens GN=COL3A1 PE=1 SV=4	P02461	1	70	174	269	0.00328	0.581	GAAGPpGPpGAAGTpGLQGMpGER	0.996	28.5	26.2	2.49		p6: Oxidation (+15.99), p9: Oxidation (+15.99), p15: Oxidation (+15.99), p21: Oxidation (+15.99)	1082.51	2163	2	-2.136	1076590
Control-1	Collagen alpha-1(III) chain OS=Homo sapiens GN=COL3A1 PE=1 SV=4	P02461	1	70	174	269	0.00328	0.581	GAAGPpGPpGAAGTpGLQGMpGER	0.996	43.3	26.7	2.1		p6: Oxidation (+15.99), p9: Oxidation (+15.99), p15: Oxidation (+15.99), p21: Oxidation (+15.99)	722.01	2163.01	3	3.185	1278350
Control-1	Collagen alpha-1(III) chain OS=Homo sapiens GN=COL3A1 PE=1 SV=4	P02461	1	70	174	269	0.00328	0.581	GAAGPpGPpGAAGTpGLQGMpGER	0.996	29	26.6	0.83		p6: Oxidation (+15.99), p9: Oxidation (+15.99), p15: Oxidation (+15.99), p21: Oxidation (+15.99)	1082.51	2163.01	2	2.827	394582
Control-1	Collagen alpha-1(III) chain OS=Homo sapiens GN=COL3A1 PE=1 SV=4	P02461	1	70	174	269	0.00328	0.581	GAAGPPGppGAAGTpGLQGmpGER	0.997	51.1	26.2	3.6		p8: Oxidation (+15.99), p9: Oxidation (+15.99), p15: Oxidation (+15.99), m20: Oxidation (+15.99), p21: Oxidation (+15.99)	1090.51	2179	2	2.231	532078
Control-1	Collagen alpha-1(III) chain OS=Homo sapiens GN=COL3A1 PE=1 SV=4	P02461	1	70	174	269	0.00328	0.581	GAAGppGPpGAAGTpGLQGmpGER	0.997	67	25.2	13.1		p5: Oxidation (+15.99), p6: Oxidation (+15.99), p9: Oxidation (+15.99), p15: Oxidation (+15.99), m20: Oxidation (+15.99), p21: Oxidation (+15.99)	1098.5	2194.99	2	-0.3607	123845
Control-1	Collagen alpha-1(III) chain OS=Homo sapiens GN=COL3A1 PE=1 SV=4	P02461	1	70	174	269	0.00328	0.581	GAAGppGPpGAAGTpGLQGmpGER	0.997	27.2	25.7	2.04		p5: Oxidation (+15.99), p6: Oxidation (+15.99), p9: Oxidation (+15.99), p15: Oxidation (+15.99), m20: Oxidation (+15.99), p21: Oxidation (+15.99)	732.673	2195	3	2.132	771519
Control-1	Collagen alpha-1(III) chain OS=Homo sapiens GN=COL3A1 PE=1 SV=4	P02461	1	70	174	269	0.00328	0.581	GAAGPpGPpGAAGTpGLQGmpGER	0.997	47.5	26.1	1.99		p6: Oxidation (+15.99), p9: Oxidation (+15.99), p15: Oxidation (+15.99), m20: Oxidation (+15.99), p21: Oxidation (+15.99)	727.341	2179	3	1.939	1228770
Control-1	Collagen alpha-1(III) chain OS=Homo sapiens GN=COL3A1 PE=1 SV=4	P02461	1	70	174	269	0.00328	0.581	GAAGPpGPpGAAGTpGLQGmpGER	0.997	66.6	26	2.18		p6: Oxidation (+15.99), p9: Oxidation (+15.99), p15: Oxidation (+15.99), m20: Oxidation (+15.99), p21: Oxidation (+15.99)	727.34	2179	3	0.3427	1340190
Control-1	Collagen alpha-1(III) chain OS=Homo sapiens GN=COL3A1 PE=1 SV=4	P02461	1	70	174	269	0.00328	0.581	GAAGPPGppGAAGTpGLQGmpGER	0.997	31.6	26.2	0.77		p8: Oxidation (+15.99), p9: Oxidation (+15.99), p15: Oxidation (+15.99), m20: Oxidation (+15.99), p21: Oxidation (+15.99)	727.341	2179	3	1.526	1590120
Control-1	Collagen alpha-1(III) chain OS=Homo sapiens GN=COL3A1 PE=1 SV=4	P02461	1	70	174	269	0.00328	0.581	GAAGPpGPpGAAGTpGLQGMpGER	0.997	33.2	26.4	1.57		p6: Oxidation (+15.99), p9: Oxidation (+15.99), p15: Oxidation (+15.99), p21: Oxidation (+15.99)	722.009	2163	3	1.244	1708430
Control-1	Collagen alpha-1(III) chain OS=Homo sapiens GN=COL3A1 PE=1 SV=4	P02461	1	70	174	269	0.00328	0.581	GAAGPpGpPGAAGTpGLQGmpGER	0.997	40.7	26	3.86		p6: Oxidation (+15.99), p8: Oxidation (+15.99), p15: Oxidation (+15.99), m20: Oxidation (+15.99), p21: Oxidation (+15.99)	1090.51	2179	2	0.5518	251566
Control-1	Collagen alpha-1(III) chain OS=Homo sapiens GN=COL3A1 PE=1 SV=4	P02461	1	70	174	269	0.00328	0.581	GApGEkGEGGpPGVAGPPGGSGPAGPpGpQGVk	0.985	21.6	27.4	2.7		p3: Oxidation (+15.99), k6: Oxidation (+15.99), p11: Oxidation (+15.99), p27: Oxidation (+15.99), p29: Oxidation (+15.99), k33: Oxidation (+15.99)	957.457	2869.35	3	0.6592	283983
Control-1	Collagen alpha-1(III) chain OS=Homo sapiens GN=COL3A1 PE=1 SV=4	P02461	1	70	174	269	0.00328	0.581	GAPGEKGEGGppGVAGppGGSGpAGPPGPQGVKGER	0.965	20.6	28	7.65		p11: Oxidation (+15.99), p12: Oxidation (+15.99), p17: Oxidation (+15.99), p18: Oxidation (+15.99), p23: Oxidation (+15.99)	799.888	3195.52	4	1.699	1276040
Control-1	Collagen alpha-1(III) chain OS=Homo sapiens GN=COL3A1 PE=1 SV=4	P02461	1	70	174	269	0.00328	0.581	GApGEkGEGGpPGVAGPPGGSGPAGPpGpQGVkGER	0.965	19.4	27.4	7.99		p3: Oxidation (+15.99), k6: Oxidation (+15.99), p11: Oxidation (+15.99), p27: Oxidation (+15.99), p29: Oxidation (+15.99), k33: Oxidation (+15.99)	1071.51	3211.51	3	-0.5099	90702.7
Control-1	Collagen alpha-1(III) chain OS=Homo sapiens GN=COL3A1 PE=1 SV=4	P02461	1	70	174	269	0.00328	0.581	GApGEkGEGGpPGVAGPPGGSGPAGppGpQGVkGER	0.966	18.4	27.3	11.4		p3: Oxidation (+15.99), k6: Oxidation (+15.99), p11: Oxidation (+15.99), p26: Oxidation (+15.99), p27: Oxidation (+15.99), p29: Oxidation (+15.99), k33: Oxidation (+15.99)	807.885	3227.51	4	0.9667	795046
Control-1	Collagen alpha-1(III) chain OS=Homo sapiens GN=COL3A1 PE=1 SV=4	P02461	1	70	174	269	0.00328	0.581	GApGEkGEGGpPGVAGPPGGSGPAGppGpQGVkGER	0.997	28.1	27.3	9.51		p3: Oxidation (+15.99), k6: Oxidation (+15.99), p11: Oxidation (+15.99), p26: Oxidation (+15.99), p27: Oxidation (+15.99), p29: Oxidation (+15.99), k33: Oxidation (+15.99)	1076.85	3227.51	3	1.678	95541.4
Control-1	Collagen alpha-1(III) chain OS=Homo sapiens GN=COL3A1 PE=1 SV=4	P02461	1	70	174	269	0.00328	0.581	GApGPAGPR	0.997	34.8	25	20.3		p3: Oxidation (+15.99)	398.209	794.404	2	-0.02131	413141
Control-1	Collagen alpha-1(III) chain OS=Homo sapiens GN=COL3A1 PE=1 SV=4	P02461	1	70	174	269	0.00328	0.581	GDAGApGApGGkGDAGApGER	0.994	70.2	25	70.2		p6: Oxidation (+15.99), p9: Oxidation (+15.99), k12: Oxidation (+15.99), p18: Oxidation (+15.99)	914.906	1827.8	2	-0.9525	55662.7
Control-1	Collagen alpha-1(III) chain OS=Homo sapiens GN=COL3A1 PE=1 SV=4	P02461	1	70	174	269	0.00328	0.581	GDAGApGApGGKGDAGApGER	0.997	69.3	25	17.5		p6: Oxidation (+15.99), p9: Oxidation (+15.99), p18: Oxidation (+15.99)	906.91	1811.81	2	0.8126	72319
Control-1	Collagen alpha-1(III) chain OS=Homo sapiens GN=COL3A1 PE=1 SV=4	P02461	1	70	174	269	0.00328	0.581	GDAGApGApGGKGDAGApGER	0.997	57	25	18.8		p6: Oxidation (+15.99), p9: Oxidation (+15.99), p18: Oxidation (+15.99)	604.942	1811.8	3	-0.04025	927237
Control-1	Collagen alpha-1(III) chain OS=Homo sapiens GN=COL3A1 PE=1 SV=4	P02461	1	70	174	269	0.00328	0.581	GDAGApGApGGkGDAGApGER	0.997	34.7	25	34.7		p6: Oxidation (+15.99), p9: Oxidation (+15.99), k12: Oxidation (+15.99), p18: Oxidation (+15.99)	610.274	1827.8	3	0.2089	418326
Control-1	Collagen alpha-1(III) chain OS=Homo sapiens GN=COL3A1 PE=1 SV=4	P02461	1	70	174	269	0.00328	0.581	GDAGApGERGPpGLAGApGLR	0.965	17.9	28	5.51		p6: Oxidation (+15.99), p12: Oxidation (+15.99), p18: Oxidation (+15.99)	960.981	1919.95	2	0.7564	193449
Control-1	Collagen alpha-1(III) chain OS=Homo sapiens GN=COL3A1 PE=1 SV=4	P02461	1	70	174	269	0.00328	0.581	GDAGApGERGPpGLAGApGLR	0.992	25.4	28.3	4.24		p6: Oxidation (+15.99), p12: Oxidation (+15.99), p18: Oxidation (+15.99)	640.99	1919.95	3	1.794	763258
Control-1	Collagen alpha-1(III) chain OS=Homo sapiens GN=COL3A1 PE=1 SV=4	P02461	1	70	174	269	0.00328	0.581	GDAGQpGEkGSpGAQGpPGAPGpLGIAGITGAR	0.997	53.5	28.1	13		p6: Oxidation (+15.99), k9: Oxidation (+15.99), p12: Oxidation (+15.99), p17: Oxidation (+15.99), p23: Oxidation (+15.99)	992.487	2974.44	3	-0.07158	3293860
Control-1	Collagen alpha-1(III) chain OS=Homo sapiens GN=COL3A1 PE=1 SV=4	P02461	1	70	174	269	0.00328	0.581	GDkGEpGGPGADGVPGK	0.973	22.2	25.1	13.7		k3: Oxidation (+15.99), p6: Oxidation (+15.99)	509.574	1525.7	3	-1.04	601556
Control-1	Collagen alpha-1(III) chain OS=Homo sapiens GN=COL3A1 PE=1 SV=4	P02461	1	70	174	269	0.00328	0.581	GDKGEpGGpGADGVPGK	0.99	84.6	25.5	31.7		p6: Oxidation (+15.99), p9: Oxidation (+15.99)	763.858	1525.7	2	0.07077	1820010
Control-1	Collagen alpha-1(III) chain OS=Homo sapiens GN=COL3A1 PE=1 SV=4	P02461	1	70	174	269	0.00328	0.581	GDKGEpGGpGADGVPGK	0.995	65.2	25.6	11.4		p6: Oxidation (+15.99), p9: Oxidation (+15.99)	509.576	1525.7	3	2.202	849556
Control-1	Collagen alpha-1(III) chain OS=Homo sapiens GN=COL3A1 PE=1 SV=4	P02461	1	70	174	269	0.00328	0.581	GDKGEpGGpGADGVpGK	0.997	68.2	25	18.3		p6: Oxidation (+15.99), p9: Oxidation (+15.99), p15: Oxidation (+15.99)	771.855	1541.7	2	0.04734	101162
Control-1	Collagen alpha-1(III) chain OS=Homo sapiens GN=COL3A1 PE=1 SV=4	P02461	1	70	174	269	0.00328	0.581	GDKGEpGGPGADGVPGK	0.997	65.8	26.1	5.65		p6: Oxidation (+15.99)	504.243	1509.71	3	0.1172	1247210
Control-1	Collagen alpha-1(III) chain OS=Homo sapiens GN=COL3A1 PE=1 SV=4	P02461	1	70	174	269	0.00328	0.581	GDKGEpGGPGADGVPGK	0.997	49.3	26	24.9		p6: Oxidation (+15.99)	755.86	1509.71	2	-0.5408	302854
Control-1	Collagen alpha-1(III) chain OS=Homo sapiens GN=COL3A1 PE=1 SV=4	P02461	1	70	174	269	0.00328	0.581	GDkGEpGGpGADGVPGK	0.997	29	25	25		k3: Oxidation (+15.99), p6: Oxidation (+15.99), p9: Oxidation (+15.99)	514.906	1541.7	3	-0.6761	314320
Control-1	Collagen alpha-1(III) chain OS=Homo sapiens GN=COL3A1 PE=1 SV=4	P02461	1	70	174	269	0.00328	0.581	GDkGEPGGpGADGVpGK	0.997	35.1	25	0.34		k3: Oxidation (+15.99), p9: Oxidation (+15.99), p15: Oxidation (+15.99)	514.907	1541.7	3	1.58	311550
Control-1	Collagen alpha-1(III) chain OS=Homo sapiens GN=COL3A1 PE=1 SV=4	P02461	1	70	174	269	0.00328	0.581	GDKGEpGGpGADGVPGK	0.997	27.7	25.5	4.32		p6: Oxidation (+15.99), p9: Oxidation (+15.99)	509.574	1525.7	3	-0.2541	447440
Control-1	Collagen alpha-1(III) chain OS=Homo sapiens GN=COL3A1 PE=1 SV=4	P02461	1	70	174	269	0.00328	0.581	GDKGEpGGpGADGVPGK	0.997	34	25.5	9.7		p6: Oxidation (+15.99), p9: Oxidation (+15.99)	763.858	1525.7	2	-0.3222	144043
Control-1	Collagen alpha-1(III) chain OS=Homo sapiens GN=COL3A1 PE=1 SV=4	P02461	1	70	174	269	0.00328	0.581	GDkGEpGGpGADGVPGK	0.997	43.2	25	17		k3: Oxidation (+15.99), p6: Oxidation (+15.99), p9: Oxidation (+15.99)	771.856	1541.7	2	0.6826	146847
Control-1	Collagen alpha-1(III) chain OS=Homo sapiens GN=COL3A1 PE=1 SV=4	P02461	1	70	174	269	0.00328	0.581	GDKGEpGGPGADGVPGK	0.997	41.9	26	10.1		p6: Oxidation (+15.99)	755.861	1509.71	2	0.1874	147403
Control-1	Collagen alpha-1(III) chain OS=Homo sapiens GN=COL3A1 PE=1 SV=4	P02461	1	70	174	269	0.00328	0.581	GDkGEpGGPGADGVPGK	0.997	37.2	25.4	12.9		k3: Oxidation (+15.99), p6: Oxidation (+15.99)	763.858	1525.7	2	0.228	159028
Control-1	Collagen alpha-1(III) chain OS=Homo sapiens GN=COL3A1 PE=1 SV=4	P02461	1	70	174	269	0.00328	0.581	GDKGEpGGPGADGVPGKDGPR	0.97	18.4	27.1	0.53		p6: Oxidation (+15.99)	645.977	1934.91	3	0.7991	393157
Control-1	Collagen alpha-1(III) chain OS=Homo sapiens GN=COL3A1 PE=1 SV=4	P02461	1	70	174	269	0.00328	0.581	GDkGEpGGpGADGVPGKDGPR	0.974	18	25.6	5.29		k3: Oxidation (+15.99), p6: Oxidation (+15.99), p9: Oxidation (+15.99)	656.64	1966.9	3	0.3949	215081
Control-1	Collagen alpha-1(III) chain OS=Homo sapiens GN=COL3A1 PE=1 SV=4	P02461	1	70	174	269	0.00328	0.581	GDKGEpGGpGADGVpGKDGPR	0.982	19.9	25.6	13.4		p6: Oxidation (+15.99), p9: Oxidation (+15.99), p15: Oxidation (+15.99)	656.64	1966.9	3	0.1204	165390
Control-1	Collagen alpha-1(III) chain OS=Homo sapiens GN=COL3A1 PE=1 SV=4	P02461	1	70	174	269	0.00328	0.581	GDKGEpGGPGADGVPGKDGPR	0.992	25.2	27.3	7.6		p6: Oxidation (+15.99)	484.735	1934.91	4	1.638	965677
Control-1	Collagen alpha-1(III) chain OS=Homo sapiens GN=COL3A1 PE=1 SV=4	P02461	1	70	174	269	0.00328	0.581	GDKGEpGGPGADGVPGKDGPR	0.997	35.5	26.9	18.4		p6: Oxidation (+15.99)	968.461	1934.91	2	-0.7423	67625.8
Control-1	Collagen alpha-1(III) chain OS=Homo sapiens GN=COL3A1 PE=1 SV=4	P02461	1	70	174	269	0.00328	0.581	GDKGEpGGpGADGVPGKDGPR	0.997	27.1	26.6	12.1		p6: Oxidation (+15.99), p9: Oxidation (+15.99)	651.309	1950.9	3	0.3648	286656
Control-1	Collagen alpha-1(III) chain OS=Homo sapiens GN=COL3A1 PE=1 SV=4	P02461	1	70	174	269	0.00328	0.581	GDKGEpGGpGADGVPGKDGPR	0.997	46.9	26.6	13.6		p6: Oxidation (+15.99), p9: Oxidation (+15.99)	651.308	1950.9	3	-0.3883	267122
Control-1	Collagen alpha-1(III) chain OS=Homo sapiens GN=COL3A1 PE=1 SV=4	P02461	1	70	174	269	0.00328	0.581	GDKGEpGGPGADGVPGKDGPR	0.997	38.4	27.2	8.5		p6: Oxidation (+15.99)	645.977	1934.91	3	-0.3476	237034
Control-1	Collagen alpha-1(III) chain OS=Homo sapiens GN=COL3A1 PE=1 SV=4	P02461	1	70	174	269	0.00328	0.581	GDKGEpGGpGADGVPGKDGPR	0.997	38	26.6	12.2		p6: Oxidation (+15.99), p9: Oxidation (+15.99)	976.459	1950.9	2	-0.5082	57961.7
Control-1	Collagen alpha-1(III) chain OS=Homo sapiens GN=COL3A1 PE=1 SV=4	P02461	1	70	174	269	0.00328	0.581	GDRGENGSPGApGApGHpGPPGPVGPAGK	0.99	23.3	27.3	14		p12: Oxidation (+15.99), p15: Oxidation (+15.99), p18: Oxidation (+15.99)	864.745	2591.21	3	0.3345	223739
Control-1	Collagen alpha-1(III) chain OS=Homo sapiens GN=COL3A1 PE=1 SV=4	P02461	1	70	174	269	0.00328	0.581	GDRGENGSpGApGApGHpGpPGPVGPAGK	0.991	28.8	26.9	2.36		p9: Oxidation (+15.99), p12: Oxidation (+15.99), p15: Oxidation (+15.99), p18: Oxidation (+15.99), p20: Oxidation (+15.99)	875.416	2623.23	3	9.4	170581
Control-1	Collagen alpha-1(III) chain OS=Homo sapiens GN=COL3A1 PE=1 SV=4	P02461	1	70	174	269	0.00328	0.581	GDRGENGSPGApGApGHpGpPGPVGPAGK	0.997	33.9	26.9	1.15		p12: Oxidation (+15.99), p15: Oxidation (+15.99), p18: Oxidation (+15.99), p20: Oxidation (+15.99)	870.078	2607.21	3	2.405	242783
Control-1	Collagen alpha-1(III) chain OS=Homo sapiens GN=COL3A1 PE=1 SV=4	P02461	1	70	174	269	0.00328	0.581	GEAGIpGVpGAK	0.997	30.8	25.8	2.96		p6: Oxidation (+15.99), p9: Oxidation (+15.99)	542.785	1083.56	2	-0.4905	4894280
Control-1	Collagen alpha-1(III) chain OS=Homo sapiens GN=COL3A1 PE=1 SV=4	P02461	1	70	174	269	0.00328	0.581	GEAGIpGVPGAk	0.997	27.9	25.8	0		p6: Oxidation (+15.99), k12: Oxidation (+15.99)	542.785	1083.56	2	0.06274	5974020
Control-1	Collagen alpha-1(III) chain OS=Homo sapiens GN=COL3A1 PE=1 SV=4	P02461	1	70	174	269	0.00328	0.581	GEAGIpGVpGAKGEDGkDGSpGEpGANGLpGAAGER	0.971	24.6	26.7	0.22		p6: Oxidation (+15.99), p9: Oxidation (+15.99), k17: Oxidation (+15.99), p21: Oxidation (+15.99), p24: Oxidation (+15.99), p30: Oxidation (+15.99)	831.889	3323.53	4	3.687	1484610
Control-1	Collagen alpha-1(III) chain OS=Homo sapiens GN=COL3A1 PE=1 SV=4	P02461	1	70	174	269	0.00328	0.581	GEAGIpGVPGAKGEDGkDGSpGEpGANGLpGAAGER	0.973	18.1	26.8	0.11		p6: Oxidation (+15.99), k17: Oxidation (+15.99), p21: Oxidation (+15.99), p24: Oxidation (+15.99), p30: Oxidation (+15.99)	827.887	3307.52	4	0.3177	878240
Control-1	Collagen alpha-1(III) chain OS=Homo sapiens GN=COL3A1 PE=1 SV=4	P02461	1	70	174	269	0.00328	0.581	GEAGIpGVpGAkGEDGkDGSpGEPGANGLpGAAGER	0.989	22.5	26.3	3.05		p6: Oxidation (+15.99), p9: Oxidation (+15.99), k12: Oxidation (+15.99), k17: Oxidation (+15.99), p21: Oxidation (+15.99), p30: Oxidation (+15.99)	1108.85	3323.52	3	0.7646	432567
Control-1	Collagen alpha-1(III) chain OS=Homo sapiens GN=COL3A1 PE=1 SV=4	P02461	1	70	174	269	0.00328	0.581	GEDGKDGSpGEPGANGLpGAAGER	0.992	31.1	25	9.8		p9: Oxidation (+15.99), p18: Oxidation (+15.99)	1113.99	2225.96	2	-9.929	74951.6
Control-1	Collagen alpha-1(III) chain OS=Homo sapiens GN=COL3A1 PE=1 SV=4	P02461	1	70	174	269	0.00328	0.581	GEDGKDGSpGEpGANGLpGAAGER	0.993	78.2	25	42.7		p9: Oxidation (+15.99), p12: Oxidation (+15.99), p18: Oxidation (+15.99)	1121.99	2241.97	2	-0.08336	121384
Control-1	Collagen alpha-1(III) chain OS=Homo sapiens GN=COL3A1 PE=1 SV=4	P02461	1	70	174	269	0.00328	0.581	GEDGKDGSpGEpGANGLpGAAGER	0.997	65.3	25	33.4		p9: Oxidation (+15.99), p12: Oxidation (+15.99), p18: Oxidation (+15.99)	1121.99	2241.97	2	-0.2974	227223
Control-1	Collagen alpha-1(III) chain OS=Homo sapiens GN=COL3A1 PE=1 SV=4	P02461	1	70	174	269	0.00328	0.581	GEDGKDGSpGEpGANGLpGAAGER	0.997	49.5	25	2.7		p9: Oxidation (+15.99), p12: Oxidation (+15.99), p18: Oxidation (+15.99)	748.331	2241.97	3	-0.5809	1908870
Control-1	Collagen alpha-1(III) chain OS=Homo sapiens GN=COL3A1 PE=1 SV=4	P02461	1	70	174	269	0.00328	0.581	GEDGKDGSpGEpGANGLpGAAGER	0.997	41.6	25	2.3		p9: Oxidation (+15.99), p12: Oxidation (+15.99), p18: Oxidation (+15.99)	748.332	2241.98	3	0.7298	415974
Control-1	Collagen alpha-1(III) chain OS=Homo sapiens GN=COL3A1 PE=1 SV=4	P02461	1	70	174	269	0.00328	0.581	GEGGPpGVAGppGGSGPAGPPGPQGVK	0.984	24.9	28.1	2.67		p6: Oxidation (+15.99), p11: Oxidation (+15.99), p12: Oxidation (+15.99)	1142.06	2282.1	2	2.327	307335
Control-1	Collagen alpha-1(III) chain OS=Homo sapiens GN=COL3A1 PE=1 SV=4	P02461	1	70	174	269	0.00328	0.581	GEGGppGVAGpPGGSGPAGPPGpQGVkGER	0.978	25.8	27.2	6.51		p5: Oxidation (+15.99), p6: Oxidation (+15.99), p11: Oxidation (+15.99), p23: Oxidation (+15.99), k27: Oxidation (+15.99)	886.421	2656.24	3	-2.918	372663
Control-1	Collagen alpha-1(III) chain OS=Homo sapiens GN=COL3A1 PE=1 SV=4	P02461	1	70	174	269	0.00328	0.581	GEGGppGVAGpPGGSGPAGPpGpQGVkGER	0.991	30.5	26.3	10.6		p5: Oxidation (+15.99), p6: Oxidation (+15.99), p11: Oxidation (+15.99), p21: Oxidation (+15.99), p23: Oxidation (+15.99), k27: Oxidation (+15.99)	891.751	2672.23	3	-4.447	269899
Control-1	Collagen alpha-1(III) chain OS=Homo sapiens GN=COL3A1 PE=1 SV=4	P02461	1	70	174	269	0.00328	0.581	GEGGPpGVAGppGGSGPAGPPGPQGVKGER	0.994	26	27.7	4.49		p6: Oxidation (+15.99), p11: Oxidation (+15.99), p12: Oxidation (+15.99)	1313.14	2624.26	2	-1.016	73311.7
Control-1	Collagen alpha-1(III) chain OS=Homo sapiens GN=COL3A1 PE=1 SV=4	P02461	1	70	174	269	0.00328	0.581	GEGGpPGVAGPPGGSGPAGPpGpQGVkGER	0.997	36.9	27.7	11.7		p5: Oxidation (+15.99), p21: Oxidation (+15.99), p23: Oxidation (+15.99), k27: Oxidation (+15.99)	1321.14	2640.26	2	1.476	92611.1
Control-1	Collagen alpha-1(III) chain OS=Homo sapiens GN=COL3A1 PE=1 SV=4	P02461	1	70	174	269	0.00328	0.581	GEmGPAGIpGApGLMGAR	0.977	20.1	26.5	3.02		m3: Oxidation (+15.99), p9: Oxidation (+15.99), p12: Oxidation (+15.99)	843.902	1685.79	2	1.11	983644
Control-1	Collagen alpha-1(III) chain OS=Homo sapiens GN=COL3A1 PE=1 SV=4	P02461	1	70	174	269	0.00328	0.581	GEMGPAGIpGApGLmGAR	0.98	22.5	26.4	19.4		p9: Oxidation (+15.99), p12: Oxidation (+15.99), m15: Oxidation (+15.99)	843.902	1685.79	2	1.62	912604
Control-1	Collagen alpha-1(III) chain OS=Homo sapiens GN=COL3A1 PE=1 SV=4	P02461	1	70	174	269	0.00328	0.581	GEmGPAGIpGApGLMGAR	0.987	22.8	26.4	7.81		m3: Oxidation (+15.99), p9: Oxidation (+15.99), p12: Oxidation (+15.99)	843.902	1685.79	2	1.182	1828350
Control-1	Collagen alpha-1(III) chain OS=Homo sapiens GN=COL3A1 PE=1 SV=4	P02461	1	70	174	269	0.00328	0.581	GEMGPAGIpGApGLMGAR	0.987	27.1	26.6	6.08		p9: Oxidation (+15.99), p12: Oxidation (+15.99)	835.899	1669.78	2	-5.13	1076990
Control-1	Collagen alpha-1(III) chain OS=Homo sapiens GN=COL3A1 PE=1 SV=4	P02461	1	70	174	269	0.00328	0.581	GEmGPAGIpGApGLMGAR	0.995	28.5	26.3	4.54		m3: Oxidation (+15.99), p9: Oxidation (+15.99), p12: Oxidation (+15.99)	843.903	1685.79	2	3.209	998309
Control-1	Collagen alpha-1(III) chain OS=Homo sapiens GN=COL3A1 PE=1 SV=4	P02461	1	70	174	269	0.00328	0.581	GEmGPAGIpGApGLmGAR	0.997	34.5	25.7	16.1		m3: Oxidation (+15.99), p9: Oxidation (+15.99), p12: Oxidation (+15.99), m15: Oxidation (+15.99)	851.899	1701.78	2	0.868	916498
Control-1	Collagen alpha-1(III) chain OS=Homo sapiens GN=COL3A1 PE=1 SV=4	P02461	1	70	174	269	0.00328	0.581	GEMGPAGIpGApGLmGAR	0.997	37.6	26.5	33.2		p9: Oxidation (+15.99), p12: Oxidation (+15.99), m15: Oxidation (+15.99)	843.903	1685.79	2	2.782	916081
Control-1	Collagen alpha-1(III) chain OS=Homo sapiens GN=COL3A1 PE=1 SV=4	P02461	1	70	174	269	0.00328	0.581	GENGSpGAPGAPGHPGPPGPVGpAGk	0.997	27.9	26.7	4.14		p6: Oxidation (+15.99), p23: Oxidation (+15.99), k26: Oxidation (+15.99)	755.361	2263.06	3	-0.7963	876041
Control-1	Collagen alpha-1(III) chain OS=Homo sapiens GN=COL3A1 PE=1 SV=4	P02461	1	70	174	269	0.00328	0.581	GENGSpGApGApGHpGpPGPVGPAGK	0.997	56.9	26.3	11.8		p6: Oxidation (+15.99), p9: Oxidation (+15.99), p12: Oxidation (+15.99), p15: Oxidation (+15.99), p17: Oxidation (+15.99)	1148.53	2295.05	2	-0.1293	139070
Control-1	Collagen alpha-1(III) chain OS=Homo sapiens GN=COL3A1 PE=1 SV=4	P02461	1	70	174	269	0.00328	0.581	GENGSpGApGApGHpGPPGPVGPAGK	0.997	26.8	26.6	4.95		p6: Oxidation (+15.99), p9: Oxidation (+15.99), p12: Oxidation (+15.99), p15: Oxidation (+15.99)	760.693	2279.06	3	0.5272	345475
Control-1	Collagen alpha-1(III) chain OS=Homo sapiens GN=COL3A1 PE=1 SV=4	P02461	1	70	174	269	0.00328	0.581	GEpGGpGADGVPGk	0.997	27.3	25	0		p3: Oxidation (+15.99), p6: Oxidation (+15.99), k14: Oxidation (+15.99)	621.784	1241.55	2	0.606	164370
Control-1	Collagen alpha-1(III) chain OS=Homo sapiens GN=COL3A1 PE=1 SV=4	P02461	1	70	174	269	0.00328	0.581	GEPGPQGHAGAQGPpGppGINGSpGGK	0.97	19.1	26.6	4.89		p15: Oxidation (+15.99), p17: Oxidation (+15.99), p18: Oxidation (+15.99), p24: Oxidation (+15.99)	1220.07	2438.12	2	1.082	104040
Control-1	Collagen alpha-1(III) chain OS=Homo sapiens GN=COL3A1 PE=1 SV=4	P02461	1	70	174	269	0.00328	0.581	GEpGPQGHAGAQGPPGPpGINGSpGGk	0.997	26.4	26.6	21.5		p3: Oxidation (+15.99), p18: Oxidation (+15.99), p24: Oxidation (+15.99), k27: Oxidation (+15.99)	813.716	2438.13	3	1.378	1258730
Control-1	Collagen alpha-1(III) chain OS=Homo sapiens GN=COL3A1 PE=1 SV=4	P02461	1	70	174	269	0.00328	0.581	GEpGPQGHAGAQGPPGPPGINGSPGGkGEmGpAGIpGApGLMGAR	0.978	23.7	26	10.9		p3: Oxidation (+15.99), k27: Oxidation (+15.99), m30: Oxidation (+15.99), p32: Oxidation (+15.99), p36: Oxidation (+15.99), p39: Oxidation (+15.99)	1023.48	4089.9	4	-1.58	549326
Control-1	Collagen alpha-1(III) chain OS=Homo sapiens GN=COL3A1 PE=1 SV=4	P02461	1	70	174	269	0.00328	0.581	GEpGPQGHAGAQGPPGPPGINGSpGGkGEmGpAGIpGApGLMGAR	0.982	24.7	25.8	3.92		p3: Oxidation (+15.99), p24: Oxidation (+15.99), k27: Oxidation (+15.99), m30: Oxidation (+15.99), p32: Oxidation (+15.99), p36: Oxidation (+15.99), p39: Oxidation (+15.99)	1027.49	4105.91	4	3.346	1494150
Control-1	Collagen alpha-1(III) chain OS=Homo sapiens GN=COL3A1 PE=1 SV=4	P02461	1	70	174	269	0.00328	0.581	GEpGPQGHAGAQGPPGppGINGSpGGkGEMGpAGIpGApGLmGAR	0.996	25	25	6.86		p3: Oxidation (+15.99), p17: Oxidation (+15.99), p18: Oxidation (+15.99), p24: Oxidation (+15.99), k27: Oxidation (+15.99), p32: Oxidation (+15.99), p36: Oxidation (+15.99), p39: Oxidation (+15.99), m42: Oxidation (+15.99)	1035.48	4137.89	4	1.409	805588
Control-1	Collagen alpha-1(III) chain OS=Homo sapiens GN=COL3A1 PE=1 SV=4	P02461	1	70	174	269	0.00328	0.581	GEpGPQGHAGAQGPPGppGINGSpGGkGEMGpAGIpGApGLMGAR	0.997	31.3	25.3	1.75		p3: Oxidation (+15.99), p17: Oxidation (+15.99), p18: Oxidation (+15.99), p24: Oxidation (+15.99), k27: Oxidation (+15.99), p32: Oxidation (+15.99), p36: Oxidation (+15.99), p39: Oxidation (+15.99)	1031.48	4121.9	4	2.083	981966
Control-1	Collagen alpha-1(III) chain OS=Homo sapiens GN=COL3A1 PE=1 SV=4	P02461	1	70	174	269	0.00328	0.581	GERGEAGIpGVpGAK	0.997	61.3	27.9	34.6		p9: Oxidation (+15.99), p12: Oxidation (+15.99)	713.869	1425.72	2	0.8748	1183710
Control-1	Collagen alpha-1(III) chain OS=Homo sapiens GN=COL3A1 PE=1 SV=4	P02461	1	70	174	269	0.00328	0.581	GERGEAGIpGVpGAK	0.997	35.7	27.6	9.78		p9: Oxidation (+15.99), p12: Oxidation (+15.99)	476.247	1425.72	3	-0.6434	4739820
Control-1	Collagen alpha-1(III) chain OS=Homo sapiens GN=COL3A1 PE=1 SV=4	P02461	1	70	174	269	0.00328	0.581	GERGEAGIpGVpGAK	0.997	30.5	27.9	13.5		p9: Oxidation (+15.99), p12: Oxidation (+15.99)	713.869	1425.72	2	1.309	297075
Control-1	Collagen alpha-1(III) chain OS=Homo sapiens GN=COL3A1 PE=1 SV=4	P02461	1	70	174	269	0.00328	0.581	GESGKpGANGLSGER	0.996	33.3	25.6	5.08		p6: Oxidation (+15.99)	477.901	1430.68	3	3.218	921088
Control-1	Collagen alpha-1(III) chain OS=Homo sapiens GN=COL3A1 PE=1 SV=4	P02461	1	70	174	269	0.00328	0.581	GESGKpGANGLSGER	0.997	61	25.6	10.9		p6: Oxidation (+15.99)	716.345	1430.68	2	0.05801	363585
Control-1	Collagen alpha-1(III) chain OS=Homo sapiens GN=COL3A1 PE=1 SV=4	P02461	1	70	174	269	0.00328	0.581	GESGPAGPAGAPGpAGSR	0.997	69.8	26.3	0		p14: Oxidation (+15.99)	754.858	1507.7	2	-0.104	1588130
Control-1	Collagen alpha-1(III) chain OS=Homo sapiens GN=COL3A1 PE=1 SV=4	P02461	1	70	174	269	0.00328	0.581	GESGpAGpAGApGPAGSR	0.997	28.1	25	5.82		p5: Oxidation (+15.99), p8: Oxidation (+15.99), p12: Oxidation (+15.99)	770.852	1539.69	2	-1.419	99713.8
Control-1	Collagen alpha-1(III) chain OS=Homo sapiens GN=COL3A1 PE=1 SV=4	P02461	1	70	174	269	0.00328	0.581	GESGPAGPAGApGPAGSR	0.997	70.8	26.1	1.95		p12: Oxidation (+15.99)	754.859	1507.7	2	0.7046	364257
Control-1	Collagen alpha-1(III) chain OS=Homo sapiens GN=COL3A1 PE=1 SV=4	P02461	1	70	174	269	0.00328	0.581	GESGPAGPAGApGPAGSR	0.997	33.5	25.8	9.11		p12: Oxidation (+15.99)	754.859	1507.7	2	1.036	118460
Control-1	Collagen alpha-1(III) chain OS=Homo sapiens GN=COL3A1 PE=1 SV=4	P02461	1	70	174	269	0.00328	0.581	GESGPAGPAGApGpAGSR	0.997	42.8	25.7	32.1		p12: Oxidation (+15.99), p14: Oxidation (+15.99)	762.856	1523.7	2	0.1102	196467
Control-1	Collagen alpha-1(III) chain OS=Homo sapiens GN=COL3A1 PE=1 SV=4	P02461	1	70	174	269	0.00328	0.581	GESGPAGPAGApGPAGSR	0.997	39.5	26.4	13.8		p12: Oxidation (+15.99)	503.575	1507.7	3	0.1637	1023380
Control-1	Collagen alpha-1(III) chain OS=Homo sapiens GN=COL3A1 PE=1 SV=4	P02461	1	70	174	269	0.00328	0.581	GETGppGPAGFpGApGQNGEpGGkGER	0.991	27	25	5.48		p5: Oxidation (+15.99), p6: Oxidation (+15.99), p12: Oxidation (+15.99), p15: Oxidation (+15.99), p21: Oxidation (+15.99), k24: Oxidation (+15.99)	857.721	2570.14	3	4.734	762475
Control-1	Collagen alpha-1(III) chain OS=Homo sapiens GN=COL3A1 PE=1 SV=4	P02461	1	70	174	269	0.00328	0.581	GETGPPGpAGFpGApGQNGEpGGKGER	0.997	42.7	25.3	33.1		p8: Oxidation (+15.99), p12: Oxidation (+15.99), p15: Oxidation (+15.99), p21: Oxidation (+15.99)	1270.08	2538.14	2	0.9838	90922
Control-1	Collagen alpha-1(III) chain OS=Homo sapiens GN=COL3A1 PE=1 SV=4	P02461	1	70	174	269	0.00328	0.581	GETGPpGpAGFpGApGQNGEpGGKGER	0.997	38.3	25	7.36		p6: Oxidation (+15.99), p8: Oxidation (+15.99), p12: Oxidation (+15.99), p15: Oxidation (+15.99), p21: Oxidation (+15.99)	852.388	2554.14	3	3.224	1289220
Control-1	Collagen alpha-1(III) chain OS=Homo sapiens GN=COL3A1 PE=1 SV=4	P02461	1	70	174	269	0.00328	0.581	GEVGPAGSpGSNGApGQR	0.997	62.3	25.2	35.1		p9: Oxidation (+15.99), p15: Oxidation (+15.99)	813.877	1625.74	2	-0.3762	409607
Control-1	Collagen alpha-1(III) chain OS=Homo sapiens GN=COL3A1 PE=1 SV=4	P02461	1	70	174	269	0.00328	0.581	GFPGNpGApGSpGpAGQQGAIGSPGPAGPR	0.968	17.9	27.5	2.51		p6: Oxidation (+15.99), p9: Oxidation (+15.99), p12: Oxidation (+15.99), p14: Oxidation (+15.99)	1337.63	2673.25	2	0.2835	335919
Control-1	Collagen alpha-1(III) chain OS=Homo sapiens GN=COL3A1 PE=1 SV=4	P02461	1	70	174	269	0.00328	0.581	GFpGNpGApGSpGPAGQQGAIGSPGPAGpR	0.971	18	26.9	5.21		p3: Oxidation (+15.99), p6: Oxidation (+15.99), p9: Oxidation (+15.99), p12: Oxidation (+15.99), p29: Oxidation (+15.99)	897.424	2689.25	3	0.7126	3171620
Control-1	Collagen alpha-1(III) chain OS=Homo sapiens GN=COL3A1 PE=1 SV=4	P02461	1	70	174	269	0.00328	0.581	GFPGNPGApGSpGpAGQQGAIGSpGPAGPR	0.972	19.7	27.6	8.46		p9: Oxidation (+15.99), p12: Oxidation (+15.99), p14: Oxidation (+15.99), p24: Oxidation (+15.99)	1337.64	2673.26	2	0.9266	1827310
Control-1	Collagen alpha-1(III) chain OS=Homo sapiens GN=COL3A1 PE=1 SV=4	P02461	1	70	174	269	0.00328	0.581	GFpGNpGApGSpGPAGQQGAIGSPGPAGpR	0.974	21.7	26.9	8.15		p3: Oxidation (+15.99), p6: Oxidation (+15.99), p9: Oxidation (+15.99), p12: Oxidation (+15.99), p29: Oxidation (+15.99)	673.321	2689.25	4	1.759	1701020
Control-1	Collagen alpha-1(III) chain OS=Homo sapiens GN=COL3A1 PE=1 SV=4	P02461	1	70	174	269	0.00328	0.581	GFPGNPGApGSpGpAGQQGAIGSpGPAGPR	0.975	19.6	27.6	2.97		p9: Oxidation (+15.99), p12: Oxidation (+15.99), p14: Oxidation (+15.99), p24: Oxidation (+15.99)	892.093	2673.26	3	0.7598	3676080
Control-1	Collagen alpha-1(III) chain OS=Homo sapiens GN=COL3A1 PE=1 SV=4	P02461	1	70	174	269	0.00328	0.581	GFPGNPGAPGSpGpAGQQGAIGSpGPAGPR	0.995	30.9	28.1	12.9		p12: Oxidation (+15.99), p14: Oxidation (+15.99), p24: Oxidation (+15.99)	1329.64	2657.27	2	3.699	199522
Control-1	Collagen alpha-1(III) chain OS=Homo sapiens GN=COL3A1 PE=1 SV=4	P02461	1	70	174	269	0.00328	0.581	GFpGNpGAPGSPGPAGQQGAIGSPGPAGpR	0.996	25.9	27.9	16.8		p3: Oxidation (+15.99), p6: Oxidation (+15.99), p29: Oxidation (+15.99)	1329.64	2657.26	2	1.036	207825
Control-1	Collagen alpha-1(III) chain OS=Homo sapiens GN=COL3A1 PE=1 SV=4	P02461	1	70	174	269	0.00328	0.581	GFpGNpGApGSpGPAGQQGAIGSPGPAGpR	0.996	33.7	26.9	16.6		p3: Oxidation (+15.99), p6: Oxidation (+15.99), p9: Oxidation (+15.99), p12: Oxidation (+15.99), p29: Oxidation (+15.99)	897.422	2689.24	3	-1.796	478571
Control-1	Collagen alpha-1(III) chain OS=Homo sapiens GN=COL3A1 PE=1 SV=4	P02461	1	70	174	269	0.00328	0.581	GFPGNpGApGSpGpAGQQGAIGSpGPAGPR	0.997	28.7	26.9	11.1		p6: Oxidation (+15.99), p9: Oxidation (+15.99), p12: Oxidation (+15.99), p14: Oxidation (+15.99), p24: Oxidation (+15.99)	897.422	2689.25	3	-1.261	1168910
Control-1	Collagen alpha-1(III) chain OS=Homo sapiens GN=COL3A1 PE=1 SV=4	P02461	1	70	174	269	0.00328	0.581	GFPGNPGAPGSpGpAGQQGAIGSpGPAGPR	0.997	26.6	27.9	17.6		p12: Oxidation (+15.99), p14: Oxidation (+15.99), p24: Oxidation (+15.99)	886.761	2657.26	3	1.011	3017970
Control-1	Collagen alpha-1(III) chain OS=Homo sapiens GN=COL3A1 PE=1 SV=4	P02461	1	70	174	269	0.00328	0.581	GFPGNPGAPGSPGpAGQQGAIGSpGPAGPR	0.997	29.2	28.1	18.2		p14: Oxidation (+15.99), p24: Oxidation (+15.99)	881.429	2641.26	3	-0.05221	595102
Control-1	Collagen alpha-1(III) chain OS=Homo sapiens GN=COL3A1 PE=1 SV=4	P02461	1	70	174	269	0.00328	0.581	GFpGNpGApGSPGPAGQQGAIGSPGPAGpR	0.997	43.9	27.6	27.7		p3: Oxidation (+15.99), p6: Oxidation (+15.99), p9: Oxidation (+15.99), p29: Oxidation (+15.99)	1337.64	2673.26	2	0.8294	276678
Control-1	Collagen alpha-1(III) chain OS=Homo sapiens GN=COL3A1 PE=1 SV=4	P02461	1	70	174	269	0.00328	0.581	GFpGNpGApGSPGPAGQQGAIGSPGPAGpR	0.997	41.5	27.6	18.5		p3: Oxidation (+15.99), p6: Oxidation (+15.99), p9: Oxidation (+15.99), p29: Oxidation (+15.99)	892.092	2673.25	3	0.008236	18612100
Control-1	Collagen alpha-1(III) chain OS=Homo sapiens GN=COL3A1 PE=1 SV=4	P02461	1	70	174	269	0.00328	0.581	GGAGEpGKNGAK	0.997	25.9	25.8	2.3		p6: Oxidation (+15.99)	529.765	1057.52	2	0.4563	1049880
Control-1	Collagen alpha-1(III) chain OS=Homo sapiens GN=COL3A1 PE=1 SV=4	P02461	1	70	174	269	0.00328	0.581	GGAGEpGKNGAkGEPGpR	0.968	18.2	27.2	1.51		p6: Oxidation (+15.99), k12: Oxidation (+15.99), p17: Oxidation (+15.99)	561.94	1682.8	3	0.8831	1835680
Control-1	Collagen alpha-1(III) chain OS=Homo sapiens GN=COL3A1 PE=1 SV=4	P02461	1	70	174	269	0.00328	0.581	GGAGppGPEGGKGAAGPPGPpGAAGTpGLQGMpGER	0.993	23.9	26.7	0.89		p5: Oxidation (+15.99), p6: Oxidation (+15.99), p21: Oxidation (+15.99), p27: Oxidation (+15.99), p33: Oxidation (+15.99)	1047.83	3140.46	3	0.8808	329236
Control-1	Collagen alpha-1(III) chain OS=Homo sapiens GN=COL3A1 PE=1 SV=4	P02461	1	70	174	269	0.00328	0.581	GGAGppGPEGGKGAAGPPGppGAAGTpGLQGMpGER	0.997	41.2	26.3	3.67		p5: Oxidation (+15.99), p6: Oxidation (+15.99), p20: Oxidation (+15.99), p21: Oxidation (+15.99), p27: Oxidation (+15.99), p33: Oxidation (+15.99)	1053.16	3156.45	3	0.08931	442237
Control-1	Collagen alpha-1(III) chain OS=Homo sapiens GN=COL3A1 PE=1 SV=4	P02461	1	70	174	269	0.00328	0.581	GGLGSpGPKGDK	0.978	19.6	25.3	4.8		p6: Oxidation (+15.99)	543.283	1084.55	2	-0.4025	207607
Control-1	Collagen alpha-1(III) chain OS=Homo sapiens GN=COL3A1 PE=1 SV=4	P02461	1	70	174	269	0.00328	0.581	GGLGSPGPKGDkGEpGGPGADGVPGK	0.981	21.6	28.2	9.87		k12: Oxidation (+15.99), p15: Oxidation (+15.99)	759.709	2276.11	3	1.011	311428
Control-1	Collagen alpha-1(III) chain OS=Homo sapiens GN=COL3A1 PE=1 SV=4	P02461	1	70	174	269	0.00328	0.581	GGLGSPGPkGDkGEpGGpGADGVpGK	0.985	21.4	27.4	13.5		k9: Oxidation (+15.99), k12: Oxidation (+15.99), p15: Oxidation (+15.99), p18: Oxidation (+15.99), p24: Oxidation (+15.99)	775.704	2324.09	3	0.3901	115921
Control-1	Collagen alpha-1(III) chain OS=Homo sapiens GN=COL3A1 PE=1 SV=4	P02461	1	70	174	269	0.00328	0.581	GGLGSpGpkGDKGEPGGPGADGVPGK	0.997	33.5	28	3.26		p6: Oxidation (+15.99), p8: Oxidation (+15.99), k9: Oxidation (+15.99)	574.031	2292.1	4	-1.36	822248
Control-1	Collagen alpha-1(III) chain OS=Homo sapiens GN=COL3A1 PE=1 SV=4	P02461	1	70	174	269	0.00328	0.581	GGLGSPGPkGDkGEpGGpGADGVPGK	0.997	34.3	27.6	20.1		k9: Oxidation (+15.99), k12: Oxidation (+15.99), p15: Oxidation (+15.99), p18: Oxidation (+15.99)	1155.05	2308.09	2	-0.9883	59034.3
Control-1	Collagen alpha-1(III) chain OS=Homo sapiens GN=COL3A1 PE=1 SV=4	P02461	1	70	174	269	0.00328	0.581	GGLGSPGPkGDkGEpGGpGADGVPGK	0.997	41.7	27.6	20		k9: Oxidation (+15.99), k12: Oxidation (+15.99), p15: Oxidation (+15.99), p18: Oxidation (+15.99)	578.03	2308.09	4	-0.7423	415944
Control-1	Collagen alpha-1(III) chain OS=Homo sapiens GN=COL3A1 PE=1 SV=4	P02461	1	70	174	269	0.00328	0.581	GGLGSPGpkGDkGEpGGpGADGVPGK	0.997	49.2	27.4	43.5		p8: Oxidation (+15.99), k9: Oxidation (+15.99), k12: Oxidation (+15.99), p15: Oxidation (+15.99), p18: Oxidation (+15.99)	775.703	2324.09	3	-0.1647	254302
Control-1	Collagen alpha-1(III) chain OS=Homo sapiens GN=COL3A1 PE=1 SV=4	P02461	1	70	174	269	0.00328	0.581	GGLGSPGPkGDkGEpGGpGADGVPGK	0.997	30.5	27.7	14.8		k9: Oxidation (+15.99), k12: Oxidation (+15.99), p15: Oxidation (+15.99), p18: Oxidation (+15.99)	770.373	2308.1	3	0.9103	247587
Control-1	Collagen alpha-1(III) chain OS=Homo sapiens GN=COL3A1 PE=1 SV=4	P02461	1	70	174	269	0.00328	0.581	GGpGGpGPQGPPGk	0.997	49.7	25.8	27.6		p3: Oxidation (+15.99), p6: Oxidation (+15.99), k14: Oxidation (+15.99)	604.289	1206.56	2	0.02735	215393
Control-1	Collagen alpha-1(III) chain OS=Homo sapiens GN=COL3A1 PE=1 SV=4	P02461	1	70	174	269	0.00328	0.581	GGpGGpGpQGpPGKNGETGPQGPPGPTGPGGDk	0.983	22.3	25.3	8.41		p3: Oxidation (+15.99), p6: Oxidation (+15.99), p8: Oxidation (+15.99), p11: Oxidation (+15.99), k33: Oxidation (+15.99)	980.783	2939.33	3	-0.6846	171001
Control-1	Collagen alpha-1(III) chain OS=Homo sapiens GN=COL3A1 PE=1 SV=4	P02461	1	70	174	269	0.00328	0.581	GLAGppGmPGpR	0.977	19.5	26.1	0		p5: Oxidation (+15.99), p6: Oxidation (+15.99), m8: Oxidation (+15.99), p11: Oxidation (+15.99)	585.782	1169.55	2	-0.2751	461453
Control-1	Collagen alpha-1(III) chain OS=Homo sapiens GN=COL3A1 PE=1 SV=4	P02461	1	70	174	269	0.00328	0.581	GLAGPPGmpGpR	0.996	28.3	26.5	0.22		m8: Oxidation (+15.99), p9: Oxidation (+15.99), p11: Oxidation (+15.99)	577.787	1153.56	2	2.818	1206330
Control-1	Collagen alpha-1(III) chain OS=Homo sapiens GN=COL3A1 PE=1 SV=4	P02461	1	70	174	269	0.00328	0.581	GLAGPpGmpGPR	0.997	29.4	26.1	7.13		p6: Oxidation (+15.99), m8: Oxidation (+15.99), p9: Oxidation (+15.99)	577.786	1153.56	2	1.224	996946
Control-1	Collagen alpha-1(III) chain OS=Homo sapiens GN=COL3A1 PE=1 SV=4	P02461	1	70	174	269	0.00328	0.581	GLAGPpGmPGpR	0.997	32.1	26.8	0		p6: Oxidation (+15.99), m8: Oxidation (+15.99), p11: Oxidation (+15.99)	577.785	1153.55	2	-0.5604	1398770
Control-1	Collagen alpha-1(III) chain OS=Homo sapiens GN=COL3A1 PE=1 SV=4	P02461	1	70	174	269	0.00328	0.581	GLAGppGMPGpR	0.997	34.7	26.2	0		p5: Oxidation (+15.99), p6: Oxidation (+15.99), p11: Oxidation (+15.99)	577.786	1153.56	2	1.12	1569300
Control-1	Collagen alpha-1(III) chain OS=Homo sapiens GN=COL3A1 PE=1 SV=4	P02461	1	70	174	269	0.00328	0.581	GLAGppGMPGpR	0.997	28.1	26.2	0.02		p5: Oxidation (+15.99), p6: Oxidation (+15.99), p11: Oxidation (+15.99)	577.785	1153.56	2	0.7042	1292860
Control-1	Collagen alpha-1(III) chain OS=Homo sapiens GN=COL3A1 PE=1 SV=4	P02461	1	70	174	269	0.00328	0.581	GLAGPpGmPGpR	0.997	30.3	26.2	0		p6: Oxidation (+15.99), m8: Oxidation (+15.99), p11: Oxidation (+15.99)	577.785	1153.56	2	0.8081	905904
Control-1	Collagen alpha-1(III) chain OS=Homo sapiens GN=COL3A1 PE=1 SV=4	P02461	1	70	174	269	0.00328	0.581	GLAGPpGMPGpR	0.997	47.2	27	2.37		p6: Oxidation (+15.99), p11: Oxidation (+15.99)	569.788	1137.56	2	0.2179	16846300
Control-1	Collagen alpha-1(III) chain OS=Homo sapiens GN=COL3A1 PE=1 SV=4	P02461	1	70	174	269	0.00328	0.581	GLAGppGmPGpR	0.997	29.8	25.1	1.33		p5: Oxidation (+15.99), p6: Oxidation (+15.99), m8: Oxidation (+15.99), p11: Oxidation (+15.99)	585.783	1169.55	2	0.4425	1342110
Control-1	Collagen alpha-1(III) chain OS=Homo sapiens GN=COL3A1 PE=1 SV=4	P02461	1	70	174	269	0.00328	0.581	GLAGPpGmPGpR	0.997	44.2	26.2	0.11		p6: Oxidation (+15.99), m8: Oxidation (+15.99), p11: Oxidation (+15.99)	577.785	1153.56	2	0.3924	10214000
Control-1	Collagen alpha-1(III) chain OS=Homo sapiens GN=COL3A1 PE=1 SV=4	P02461	1	70	174	269	0.00328	0.581	GLAGPpGmpGPR	0.997	36.2	26.1	9.13		p6: Oxidation (+15.99), m8: Oxidation (+15.99), p9: Oxidation (+15.99)	577.786	1153.56	2	1.449	1084100
Control-1	Collagen alpha-1(III) chain OS=Homo sapiens GN=COL3A1 PE=1 SV=4	P02461	1	70	174	269	0.00328	0.581	GLAGPpGmPGpR	0.997	37.4	26.2	10.4		p6: Oxidation (+15.99), m8: Oxidation (+15.99), p11: Oxidation (+15.99)	577.785	1153.56	2	0.3924	718270
Control-1	Collagen alpha-1(III) chain OS=Homo sapiens GN=COL3A1 PE=1 SV=4	P02461	1	70	174	269	0.00328	0.581	GLAGPpGMpGPR	0.997	38.2	27	3.34		p6: Oxidation (+15.99), p9: Oxidation (+15.99)	569.788	1137.56	2	0.7448	2346070
Control-1	Collagen alpha-1(III) chain OS=Homo sapiens GN=COL3A1 PE=1 SV=4	P02461	1	70	174	269	0.00328	0.581	GLAGPpGmpGPR	0.997	38.9	27	10.4		p6: Oxidation (+15.99), m8: Oxidation (+15.99), p9: Oxidation (+15.99)	577.785	1153.56	2	-0.04068	843577
Control-1	Collagen alpha-1(III) chain OS=Homo sapiens GN=COL3A1 PE=1 SV=4	P02461	1	70	174	269	0.00328	0.581	GLpGPpGIK	0.997	29.7	25	0		p3: Oxidation (+15.99), p6: Oxidation (+15.99)	434.25	866.486	2	-0.2213	14848700	P27658
Control-1	Collagen alpha-1(III) chain OS=Homo sapiens GN=COL3A1 PE=1 SV=4	P02461	1	70	174	269	0.00328	0.581	GLpGppGSNGNpGppGpSGSPGK	0.976	17.9	25	0.12		p3: Oxidation (+15.99), p5: Oxidation (+15.99), p6: Oxidation (+15.99), p12: Oxidation (+15.99), p14: Oxidation (+15.99), p15: Oxidation (+15.99), p17: Oxidation (+15.99)	698.651	2092.93	3	0.3424	332667
Control-1	Collagen alpha-1(III) chain OS=Homo sapiens GN=COL3A1 PE=1 SV=4	P02461	1	70	174	269	0.00328	0.581	GLpGppGSNGNpGppGPSGSPGk	0.997	25.4	25	0.91		p3: Oxidation (+15.99), p5: Oxidation (+15.99), p6: Oxidation (+15.99), p12: Oxidation (+15.99), p14: Oxidation (+15.99), p15: Oxidation (+15.99), k23: Oxidation (+15.99)	1047.47	2092.93	2	1.162	49241
Control-1	Collagen alpha-1(III) chain OS=Homo sapiens GN=COL3A1 PE=1 SV=4	P02461	1	70	174	269	0.00328	0.581	GLPGPPGSNGNPGppGpSGSpGkDGppGpAGNTGApGSpGVSGPK	0.981	25.7	26.3	18.6		p14: Oxidation (+15.99), p15: Oxidation (+15.99), p17: Oxidation (+15.99), p21: Oxidation (+15.99), k23: Oxidation (+15.99), p26: Oxidation (+15.99), p27: Oxidation (+15.99), p29: Oxidation (+15.99), p36: Oxidation (+15.99), p39: Oxidation (+15.99)	999.965	3995.83	4	7.01	721058
Control-1	Collagen alpha-1(III) chain OS=Homo sapiens GN=COL3A1 PE=1 SV=4	P02461	1	70	174	269	0.00328	0.581	GmpGSpGGpGSDGkpGPPGSQGESGRPGPPGpSGpR	0.974	22.2	25	14.7		m2: Oxidation (+15.99), p3: Oxidation (+15.99), p6: Oxidation (+15.99), p9: Oxidation (+15.99), k14: Oxidation (+15.99), p15: Oxidation (+15.99), p32: Oxidation (+15.99), p35: Oxidation (+15.99)	1112.16	3333.45	3	-1.211	167912
Control-1	Collagen alpha-1(III) chain OS=Homo sapiens GN=COL3A1 PE=1 SV=4	P02461	1	70	174	269	0.00328	0.581	GmpGSpGGpGSDGKPGPPGSQGESGRPGPpGpSGpR	0.982	20	25	6.67		m2: Oxidation (+15.99), p3: Oxidation (+15.99), p6: Oxidation (+15.99), p9: Oxidation (+15.99), p30: Oxidation (+15.99), p32: Oxidation (+15.99), p35: Oxidation (+15.99)	1106.83	3317.46	3	-0.251	93084
Control-1	Collagen alpha-1(III) chain OS=Homo sapiens GN=COL3A1 PE=1 SV=4	P02461	1	70	174	269	0.00328	0.581	GMpGSpGGpGSDGkpGPPGSQGESGRPGPPGpSGpR	0.997	25.2	25	14.8		p3: Oxidation (+15.99), p6: Oxidation (+15.99), p9: Oxidation (+15.99), k14: Oxidation (+15.99), p15: Oxidation (+15.99), p32: Oxidation (+15.99), p35: Oxidation (+15.99)	1106.83	3317.46	3	0.6349	1415560
Control-1	Collagen alpha-1(III) chain OS=Homo sapiens GN=COL3A1 PE=1 SV=4	P02461	1	70	174	269	0.00328	0.581	GMPGSPGGPGSDGKPGppGSQGESGRpGpPGPSGPR	0.997	36.4	25	6.22		p17: Oxidation (+15.99), p18: Oxidation (+15.99), p27: Oxidation (+15.99), p29: Oxidation (+15.99)	654.898	3269.45	5	-7.525	455734
Control-1	Collagen alpha-1(III) chain OS=Homo sapiens GN=COL3A1 PE=1 SV=4	P02461	1	70	174	269	0.00328	0.581	GPAGPNGIpGEk	0.976	21.2	26	10.9		p9: Oxidation (+15.99), k12: Oxidation (+15.99)	563.28	1124.55	2	-0.7747	934681
Control-1	Collagen alpha-1(III) chain OS=Homo sapiens GN=COL3A1 PE=1 SV=4	P02461	1	70	174	269	0.00328	0.581	GPAGPNGIpGEkGPAGER	0.995	24.5	27.2	7.45		p9: Oxidation (+15.99), k12: Oxidation (+15.99)	564.948	1691.82	3	0.3202	1312440
Control-1	Collagen alpha-1(III) chain OS=Homo sapiens GN=COL3A1 PE=1 SV=4	P02461	1	70	174	269	0.00328	0.581	GPpGLAGApGLR	0.988	22.1	25.6	10.1		p3: Oxidation (+15.99), p9: Oxidation (+15.99)	547.801	1093.59	2	-0.1754	2305230
Control-1	Collagen alpha-1(III) chain OS=Homo sapiens GN=COL3A1 PE=1 SV=4	P02461	1	70	174	269	0.00328	0.581	GppGLAGApGLR	0.997	26.9	26.1	23.2		p2: Oxidation (+15.99), p3: Oxidation (+15.99), p9: Oxidation (+15.99)	555.799	1109.58	2	0.552	644910
Control-1	Collagen alpha-1(III) chain OS=Homo sapiens GN=COL3A1 PE=1 SV=4	P02461	1	70	174	269	0.00328	0.581	GPpGLAGApGLR	0.997	42.3	26.1	11.7		p3: Oxidation (+15.99), p9: Oxidation (+15.99)	547.802	1093.59	2	0.2631	24007700
Control-1	Collagen alpha-1(III) chain OS=Homo sapiens GN=COL3A1 PE=1 SV=4	P02461	1	70	174	269	0.00328	0.581	GPpGLAGApGLR	0.997	34.6	26.1	4.1		p3: Oxidation (+15.99), p9: Oxidation (+15.99)	547.802	1093.59	2	0.5007	1755560
Control-1	Collagen alpha-1(III) chain OS=Homo sapiens GN=COL3A1 PE=1 SV=4	P02461	1	70	174	269	0.00328	0.581	GppGPAGANGApGLR	0.997	26.6	27.7	9.88		p2: Oxidation (+15.99), p3: Oxidation (+15.99), p12: Oxidation (+15.99)	668.835	1335.66	2	1.461	328552
Control-1	Collagen alpha-1(III) chain OS=Homo sapiens GN=COL3A1 PE=1 SV=4	P02461	1	70	174	269	0.00328	0.581	GPpGPAGANGApGLR	0.997	30.1	27.7	9.83		p3: Oxidation (+15.99), p12: Oxidation (+15.99)	660.836	1319.66	2	-0.05449	872341
Control-1	Collagen alpha-1(III) chain OS=Homo sapiens GN=COL3A1 PE=1 SV=4	P02461	1	70	174	269	0.00328	0.581	GPpGPAGANGApGLR	0.997	41.2	27.7	9.03		p3: Oxidation (+15.99), p12: Oxidation (+15.99)	660.837	1319.66	2	0.2181	806936
Control-1	Collagen alpha-1(III) chain OS=Homo sapiens GN=COL3A1 PE=1 SV=4	P02461	1	70	174	269	0.00328	0.581	GPpGPQGLpGLAGTAGEpGR	0.992	82.7	28.1	13.2		p3: Oxidation (+15.99), p9: Oxidation (+15.99), p18: Oxidation (+15.99)	917.459	1832.9	2	0.7269	2258960
Control-1	Collagen alpha-1(III) chain OS=Homo sapiens GN=COL3A1 PE=1 SV=4	P02461	1	70	174	269	0.00328	0.581	GppGPQGLpGLAGTAGEpGR	0.997	45.3	28	6.4		p2: Oxidation (+15.99), p3: Oxidation (+15.99), p9: Oxidation (+15.99), p18: Oxidation (+15.99)	617.306	1848.9	3	-0.6638	1350520
Control-1	Collagen alpha-1(III) chain OS=Homo sapiens GN=COL3A1 PE=1 SV=4	P02461	1	70	174	269	0.00328	0.581	GppGPQGLpGLAGTAGEpGR	0.997	34.6	27.8	6.78		p2: Oxidation (+15.99), p3: Oxidation (+15.99), p9: Oxidation (+15.99), p18: Oxidation (+15.99)	925.455	1848.9	2	-0.4335	695100
Control-1	Collagen alpha-1(III) chain OS=Homo sapiens GN=COL3A1 PE=1 SV=4	P02461	1	70	174	269	0.00328	0.581	GPpGPQGLpGLAGTAGEpGR	0.997	29.6	28.1	9.61		p3: Oxidation (+15.99), p9: Oxidation (+15.99), p18: Oxidation (+15.99)	917.459	1832.9	2	0.5851	502512
Control-1	Collagen alpha-1(III) chain OS=Homo sapiens GN=COL3A1 PE=1 SV=4	P02461	1	70	174	269	0.00328	0.581	GPPGpQGLpGLAGTAGEpGR	0.997	43.5	28.1	0.2		p5: Oxidation (+15.99), p9: Oxidation (+15.99), p18: Oxidation (+15.99)	611.975	1832.9	3	0.4891	5238900
Control-1	Collagen alpha-1(III) chain OS=Homo sapiens GN=COL3A1 PE=1 SV=4	P02461	1	70	174	269	0.00328	0.581	GppGPQGLpGLAGTAGEpGRDGNpGSDGLpGR	0.982	23.1	26.5	4.37		p2: Oxidation (+15.99), p3: Oxidation (+15.99), p9: Oxidation (+15.99), p18: Oxidation (+15.99), p24: Oxidation (+15.99), p30: Oxidation (+15.99)	1002.14	3003.39	3	-0.9513	966932
Control-1	Collagen alpha-1(III) chain OS=Homo sapiens GN=COL3A1 PE=1 SV=4	P02461	1	70	174	269	0.00328	0.581	GpPGPQGLpGLAGTAGEpGRDGNpGSDGLpGR	0.991	25.3	26.8	2.61		p2: Oxidation (+15.99), p9: Oxidation (+15.99), p18: Oxidation (+15.99), p24: Oxidation (+15.99), p30: Oxidation (+15.99)	996.805	2987.39	3	-1.229	2055710
Control-1	Collagen alpha-1(III) chain OS=Homo sapiens GN=COL3A1 PE=1 SV=4	P02461	1	70	174	269	0.00328	0.581	GPPGpQGLpGLAGTAGEpGRDGNpGSDGLPGR	0.993	24.2	27.3	18.3		p5: Oxidation (+15.99), p9: Oxidation (+15.99), p18: Oxidation (+15.99), p24: Oxidation (+15.99)	991.476	2971.41	3	0.8317	881542
Control-1	Collagen alpha-1(III) chain OS=Homo sapiens GN=COL3A1 PE=1 SV=4	P02461	1	70	174	269	0.00328	0.581	GppGPQGLpGLAGTAGEpGRDGNpGSDGLpGR	0.996	50.8	26.5	4.37		p2: Oxidation (+15.99), p3: Oxidation (+15.99), p9: Oxidation (+15.99), p18: Oxidation (+15.99), p24: Oxidation (+15.99), p30: Oxidation (+15.99)	751.854	3003.39	4	-1.346	1171630
Control-1	Collagen alpha-1(III) chain OS=Homo sapiens GN=COL3A1 PE=1 SV=4	P02461	1	70	174	269	0.00328	0.581	GpPGPQGLpGLAGTAGEpGRDGNpGSDGLpGR	0.997	49.5	26.8	9.72		p2: Oxidation (+15.99), p9: Oxidation (+15.99), p18: Oxidation (+15.99), p24: Oxidation (+15.99), p30: Oxidation (+15.99)	747.857	2987.4	4	-0.2707	3642910
Control-1	Collagen alpha-1(III) chain OS=Homo sapiens GN=COL3A1 PE=1 SV=4	P02461	1	70	174	269	0.00328	0.581	GppGPQGLpGLAGTAGEpGRDGNpGSDGLpGR	0.997	28.6	26.7	5.46		p2: Oxidation (+15.99), p3: Oxidation (+15.99), p9: Oxidation (+15.99), p18: Oxidation (+15.99), p24: Oxidation (+15.99), p30: Oxidation (+15.99)	1002.14	3003.39	3	0.6863	954642
Control-1	Collagen alpha-1(III) chain OS=Homo sapiens GN=COL3A1 PE=1 SV=4	P02461	1	70	174	269	0.00328	0.581	GpPGPQGLpGLAGTAGEpGRDGNpGSDGLpGR	0.997	33.6	27	7.41		p2: Oxidation (+15.99), p9: Oxidation (+15.99), p18: Oxidation (+15.99), p24: Oxidation (+15.99), p30: Oxidation (+15.99)	996.807	2987.4	3	0.7887	4469950
Control-1	Collagen alpha-1(III) chain OS=Homo sapiens GN=COL3A1 PE=1 SV=4	P02461	1	70	174	269	0.00328	0.581	GpPGPQGLpGLAGTAGEpGRDGNpGSDGLpGR	0.997	43.2	26.9	7.59		p2: Oxidation (+15.99), p9: Oxidation (+15.99), p18: Oxidation (+15.99), p24: Oxidation (+15.99), p30: Oxidation (+15.99)	747.857	2987.4	4	0.2112	2061300
Control-1	Collagen alpha-1(III) chain OS=Homo sapiens GN=COL3A1 PE=1 SV=4	P02461	1	70	174	269	0.00328	0.581	GpPGPQGLpGLAGTAGEpGRDGNpGSDGLpGR	0.997	33.9	26.9	2.44		p2: Oxidation (+15.99), p9: Oxidation (+15.99), p18: Oxidation (+15.99), p24: Oxidation (+15.99), p30: Oxidation (+15.99)	996.807	2987.4	3	0.3571	11943300
Control-1	Collagen alpha-1(III) chain OS=Homo sapiens GN=COL3A1 PE=1 SV=4	P02461	1	70	174	269	0.00328	0.581	GPTGPIGPpGpAGQPGDK	0.997	50.7	27.4	7.86		p9: Oxidation (+15.99), p11: Oxidation (+15.99)	816.406	1630.8	2	0.7771	918969
Control-1	Collagen alpha-1(III) chain OS=Homo sapiens GN=COL3A1 PE=1 SV=4	P02461	1	70	174	269	0.00328	0.581	GPTGPIGppGpAGQPGDK	0.997	39.9	27.3	7.5		p8: Oxidation (+15.99), p9: Oxidation (+15.99), p11: Oxidation (+15.99)	824.401	1646.79	2	-2.14	444529
Control-1	Collagen alpha-1(III) chain OS=Homo sapiens GN=COL3A1 PE=1 SV=4	P02461	1	70	174	269	0.00328	0.581	GPTGPIGPPGPAGQpGDkGEGGApGLpGIAGPR	0.966	22	28.2	6.84		p15: Oxidation (+15.99), k18: Oxidation (+15.99), p24: Oxidation (+15.99), p27: Oxidation (+15.99)	1475.74	2949.47	2	2.087	118356
Control-1	Collagen alpha-1(III) chain OS=Homo sapiens GN=COL3A1 PE=1 SV=4	P02461	1	70	174	269	0.00328	0.581	GPTGPIGPPGpAGQpGDkGEGGApGLPGIAGPR	0.989	22.8	28.2	1.81		p11: Oxidation (+15.99), p15: Oxidation (+15.99), k18: Oxidation (+15.99), p24: Oxidation (+15.99)	984.161	2949.46	3	0.2989	3161980
Control-1	Collagen alpha-1(III) chain OS=Homo sapiens GN=COL3A1 PE=1 SV=4	P02461	1	70	174	269	0.00328	0.581	GPTGPIGPPGpAGQpGDkGEGGApGLPGIAGPR	0.997	28	28.2	6.37		p11: Oxidation (+15.99), p15: Oxidation (+15.99), k18: Oxidation (+15.99), p24: Oxidation (+15.99)	984.16	2949.46	3	-0.1891	542553
Control-1	Collagen alpha-1(III) chain OS=Homo sapiens GN=COL3A1 PE=1 SV=4	P02461	1	70	174	269	0.00328	0.581	GPTGPIGPPGpAGQpGDkGEGGApGLpGIAGPR	0.997	35.2	28	28.1		p11: Oxidation (+15.99), p15: Oxidation (+15.99), k18: Oxidation (+15.99), p24: Oxidation (+15.99), p27: Oxidation (+15.99)	742.371	2965.45	4	-0.04348	2560010
Control-1	Collagen alpha-1(III) chain OS=Homo sapiens GN=COL3A1 PE=1 SV=4	P02461	1	70	174	269	0.00328	0.581	GPTGPIGPPGpAGQpGDkGEGGApGLpGIAGPR	0.997	31.4	27.9	23.6		p11: Oxidation (+15.99), p15: Oxidation (+15.99), k18: Oxidation (+15.99), p24: Oxidation (+15.99), p27: Oxidation (+15.99)	989.492	2965.45	3	0.3294	513058
Control-1	Collagen alpha-1(III) chain OS=Homo sapiens GN=COL3A1 PE=1 SV=4	P02461	1	70	174	269	0.00328	0.581	GPVGPSGPPGk	0.997	31.9	27.1	2.67		k11: Oxidation (+15.99)	483.256	964.497	2	-1.074	573801
Control-1	Collagen alpha-1(III) chain OS=Homo sapiens GN=COL3A1 PE=1 SV=4	P02461	1	70	174	269	0.00328	0.581	GPVGPSGPpGK	0.997	57.4	27.1	8.33		p9: Oxidation (+15.99)	483.256	964.498	2	-0.05899	9308770
Control-1	Collagen alpha-1(III) chain OS=Homo sapiens GN=COL3A1 PE=1 SV=4	P02461	1	70	174	269	0.00328	0.581	GPVGPSGPpGK	0.997	31.3	27	1.88		p9: Oxidation (+15.99)	483.256	964.498	2	-0.4526	489366
Control-1	Collagen alpha-1(III) chain OS=Homo sapiens GN=COL3A1 PE=1 SV=4	P02461	1	70	174	269	0.00328	0.581	GPVGPSGPPGK	0.997	37.1	27.3	37.1			475.259	948.503	2	0.1033	818490
Control-1	Collagen alpha-1(III) chain OS=Homo sapiens GN=COL3A1 PE=1 SV=4	P02461	1	70	174	269	0.00328	0.581	GPVGPSGPPGKDGTSGHpGpIGPPGPR	0.993	24.5	28.5	6.14		p18: Oxidation (+15.99), p20: Oxidation (+15.99)	821.079	2460.22	3	0.2162	696661
Control-1	Collagen alpha-1(III) chain OS=Homo sapiens GN=COL3A1 PE=1 SV=4	P02461	1	70	174	269	0.00328	0.581	GPVGPSGPPGkDGTSGHpGpIGPPGPR	0.997	30.1	28.5	22.6		k11: Oxidation (+15.99), p18: Oxidation (+15.99), p20: Oxidation (+15.99)	1239.11	2476.22	2	2.104	155945
Control-1	Collagen alpha-1(III) chain OS=Homo sapiens GN=COL3A1 PE=1 SV=4	P02461	1	70	174	269	0.00328	0.581	GPVGPSGPPGKDGTSGHPGpIGpPGPR	0.997	31.9	28.3	6.59		p20: Oxidation (+15.99), p23: Oxidation (+15.99)	1231.11	2460.21	2	-0.8418	111440
Control-1	Collagen alpha-1(III) chain OS=Homo sapiens GN=COL3A1 PE=1 SV=4	P02461	1	70	174	269	0.00328	0.581	GPVGPSGPPGKDGTSGHPGpIGpPGPR	0.997	37.8	28.2	12.8		p20: Oxidation (+15.99), p23: Oxidation (+15.99)	821.071	2460.19	3	-10.05	715576
Control-1	Collagen alpha-1(III) chain OS=Homo sapiens GN=COL3A1 PE=1 SV=4	P02461	1	70	174	269	0.00328	0.581	GPVGPSGPPGKDGTSGHPGPIGPpGPR	0.997	38.8	28.5	0		p24: Oxidation (+15.99)	815.749	2444.22	3	1.835	867361
Control-1	Collagen alpha-1(III) chain OS=Homo sapiens GN=COL3A1 PE=1 SV=4	P02461	1	70	174	269	0.00328	0.581	GPVGPSGPPGkDGTSGHpGpIGPPGPR	0.997	39.6	28.5	23.4		k11: Oxidation (+15.99), p18: Oxidation (+15.99), p20: Oxidation (+15.99)	826.412	2476.21	3	1.137	2271830
Control-1	Collagen alpha-1(III) chain OS=Homo sapiens GN=COL3A1 PE=1 SV=4	P02461	1	70	174	269	0.00328	0.581	GQpGVmGFpGPK	0.973	19.1	25.6	7.15		p3: Oxidation (+15.99), m6: Oxidation (+15.99), p9: Oxidation (+15.99)	610.293	1218.57	2	1.126	1897760	P02458
Control-1	Collagen alpha-1(III) chain OS=Homo sapiens GN=COL3A1 PE=1 SV=4	P02461	1	70	174	269	0.00328	0.581	GQpGVmGFpGPK	0.99	22.9	25.7	7.96		p3: Oxidation (+15.99), m6: Oxidation (+15.99), p9: Oxidation (+15.99)	610.293	1218.57	2	1.027	945876	P02458
Control-1	Collagen alpha-1(III) chain OS=Homo sapiens GN=COL3A1 PE=1 SV=4	P02461	1	70	174	269	0.00328	0.581	GQpGVmGFpGPk	0.995	24.1	25	0		p3: Oxidation (+15.99), m6: Oxidation (+15.99), p9: Oxidation (+15.99), k12: Oxidation (+15.99)	618.29	1234.57	2	-0.293	784735	P02458
Control-1	Collagen alpha-1(III) chain OS=Homo sapiens GN=COL3A1 PE=1 SV=4	P02461	1	70	174	269	0.00328	0.581	GQpGVmGFpGPK	0.997	27	25.3	7.17		p3: Oxidation (+15.99), m6: Oxidation (+15.99), p9: Oxidation (+15.99)	610.292	1218.57	2	-0.7765	1249130	P02458
Control-1	Collagen alpha-1(III) chain OS=Homo sapiens GN=COL3A1 PE=1 SV=4	P02461	1	70	174	269	0.00328	0.581	GQpGVmGFpGPK	0.997	25.7	25.1	8.01		p3: Oxidation (+15.99), m6: Oxidation (+15.99), p9: Oxidation (+15.99)	610.293	1218.57	2	0.7322	5366820	P02458
Control-1	Collagen alpha-1(III) chain OS=Homo sapiens GN=COL3A1 PE=1 SV=4	P02461	1	70	174	269	0.00328	0.581	GQpGVmGFpGPk	0.997	31.7	25	0		p3: Oxidation (+15.99), m6: Oxidation (+15.99), p9: Oxidation (+15.99), k12: Oxidation (+15.99)	618.291	1234.57	2	1.18	1549310	P02458
Control-1	Collagen alpha-1(III) chain OS=Homo sapiens GN=COL3A1 PE=1 SV=4	P02461	1	70	174	269	0.00328	0.581	GQpGVMGFPGPk	0.997	33.1	26	0		p3: Oxidation (+15.99), k12: Oxidation (+15.99)	602.295	1202.58	2	-0.04317	3664260	P02458
Control-1	Collagen alpha-1(III) chain OS=Homo sapiens GN=COL3A1 PE=1 SV=4	P02461	1	70	174	269	0.00328	0.581	GQpGVMGFpGPkGNDGAPGk	0.984	20.4	26.4	0		p3: Oxidation (+15.99), p9: Oxidation (+15.99), k12: Oxidation (+15.99), k20: Oxidation (+15.99)	644.636	1930.89	3	0.3841	1171380
Control-1	Collagen alpha-1(III) chain OS=Homo sapiens GN=COL3A1 PE=1 SV=4	P02461	1	70	174	269	0.00328	0.581	GQpGVmGFpGpKGNDGApGKNGER	0.973	24.9	25.4	4.08		p3: Oxidation (+15.99), m6: Oxidation (+15.99), p9: Oxidation (+15.99), p11: Oxidation (+15.99), p18: Oxidation (+15.99)	802.033	2403.08	3	-3.953	396744
Control-1	Collagen alpha-1(III) chain OS=Homo sapiens GN=COL3A1 PE=1 SV=4	P02461	1	70	174	269	0.00328	0.581	GSDGQPGPpGppGTAGFpGSpGAK	0.989	25.7	25	12.5		p9: Oxidation (+15.99), p11: Oxidation (+15.99), p12: Oxidation (+15.99), p18: Oxidation (+15.99), p21: Oxidation (+15.99)	723.992	2168.95	3	-3.181	1951210
Control-1	Collagen alpha-1(III) chain OS=Homo sapiens GN=COL3A1 PE=1 SV=4	P02461	1	70	174	269	0.00328	0.581	GSDGQpGPPGppGTAGFpGSpGAk	0.992	57.1	25	4.45		p6: Oxidation (+15.99), p11: Oxidation (+15.99), p12: Oxidation (+15.99), p18: Oxidation (+15.99), p21: Oxidation (+15.99), k24: Oxidation (+15.99)	1093.48	2184.95	2	-2.421	526737
Control-1	Collagen alpha-1(III) chain OS=Homo sapiens GN=COL3A1 PE=1 SV=4	P02461	1	70	174	269	0.00328	0.581	GSDGQPGPpGppGTAGFpGSpGAK	0.992	24.3	25	6.38		p9: Oxidation (+15.99), p11: Oxidation (+15.99), p12: Oxidation (+15.99), p18: Oxidation (+15.99), p21: Oxidation (+15.99)	1085.49	2168.97	2	1.854	793947
Control-1	Collagen alpha-1(III) chain OS=Homo sapiens GN=COL3A1 PE=1 SV=4	P02461	1	70	174	269	0.00328	0.581	GSDGQPGPpGppGTAGFpGSpGAK	0.997	24.4	25	8		p9: Oxidation (+15.99), p11: Oxidation (+15.99), p12: Oxidation (+15.99), p18: Oxidation (+15.99), p21: Oxidation (+15.99)	1085.49	2168.96	2	0.7295	500237
Control-1	Collagen alpha-1(III) chain OS=Homo sapiens GN=COL3A1 PE=1 SV=4	P02461	1	70	174	269	0.00328	0.581	GSDGQpGpPGPpGTAGFpGSpGAkGEVGpAGSpGSNGApGQR	0.968	17.1	25	4.24		p6: Oxidation (+15.99), p8: Oxidation (+15.99), p12: Oxidation (+15.99), p18: Oxidation (+15.99), p21: Oxidation (+15.99), k24: Oxidation (+15.99), p29: Oxidation (+15.99), p33: Oxidation (+15.99), p39: Oxidation (+15.99)	1270.57	3808.68	3	0.8155	178161
Control-1	Collagen alpha-1(III) chain OS=Homo sapiens GN=COL3A1 PE=1 SV=4	P02461	1	70	174	269	0.00328	0.581	GSDGQpGpPGPpGTAGFpGSpGAkGEVGpAGSpGSNGApGQR	0.969	24.1	25	5.51		p6: Oxidation (+15.99), p8: Oxidation (+15.99), p12: Oxidation (+15.99), p18: Oxidation (+15.99), p21: Oxidation (+15.99), k24: Oxidation (+15.99), p29: Oxidation (+15.99), p33: Oxidation (+15.99), p39: Oxidation (+15.99)	1270.57	3808.7	3	4.084	266264
Control-1	Collagen alpha-1(III) chain OS=Homo sapiens GN=COL3A1 PE=1 SV=4	P02461	1	70	174	269	0.00328	0.581	GSDGQpGppGpPGTAGFPGSPGAkGEVGpAGSpGSNGApGQR	0.985	21.6	25	8.88		p6: Oxidation (+15.99), p8: Oxidation (+15.99), p9: Oxidation (+15.99), p11: Oxidation (+15.99), k24: Oxidation (+15.99), p29: Oxidation (+15.99), p33: Oxidation (+15.99), p39: Oxidation (+15.99)	1265.24	3792.69	3	1.284	138166
Control-1	Collagen alpha-1(III) chain OS=Homo sapiens GN=COL3A1 PE=1 SV=4	P02461	1	70	174	269	0.00328	0.581	GSDGQpGpPGPpGTAGFpGSpGAkGEVGpAGSpGSNGApGQR	0.992	24.3	25	3.18		p6: Oxidation (+15.99), p8: Oxidation (+15.99), p12: Oxidation (+15.99), p18: Oxidation (+15.99), p21: Oxidation (+15.99), k24: Oxidation (+15.99), p29: Oxidation (+15.99), p33: Oxidation (+15.99), p39: Oxidation (+15.99)	953.179	3808.69	4	2.014	599220
Control-1	Collagen alpha-1(III) chain OS=Homo sapiens GN=COL3A1 PE=1 SV=4	P02461	1	70	174	269	0.00328	0.581	GSEGSpGHpGQpGppGPPGAPGpccGGVGAAAIAGIGGEk	0.996	24.2	25	1.99	c24: Carbamidomethyl (+57.02), c25: Carbamidomethyl (+57.02)	p6: Oxidation (+15.99), p9: Oxidation (+15.99), p12: Oxidation (+15.99), p14: Oxidation (+15.99), p15: Oxidation (+15.99), p23: Oxidation (+15.99), k40: Oxidation (+15.99)	1210.21	3627.6	3	0.004518	465764
Control-1	Collagen alpha-1(III) chain OS=Homo sapiens GN=COL3A1 PE=1 SV=4	P02461	1	70	174	269	0.00328	0.581	GSpGAQGPpGApGPLGIAGITGAR	0.988	24.7	28.2	4.79		p3: Oxidation (+15.99), p9: Oxidation (+15.99), p12: Oxidation (+15.99)	1052.54	2103.07	2	-0.9443	544898
Control-1	Collagen alpha-1(III) chain OS=Homo sapiens GN=COL3A1 PE=1 SV=4	P02461	1	70	174	269	0.00328	0.581	GSpGAQGPPGApGPLGIAGITGAR	0.995	72	27.7	9.6		p3: Oxidation (+15.99), p12: Oxidation (+15.99)	1044.55	2087.08	2	1.527	1083100
Control-1	Collagen alpha-1(III) chain OS=Homo sapiens GN=COL3A1 PE=1 SV=4	P02461	1	70	174	269	0.00328	0.581	GSpGAQGPpGAPGPLGIAGITGAR	0.997	28.8	28	0.61		p3: Oxidation (+15.99), p9: Oxidation (+15.99)	696.701	2087.08	3	2.309	4203950
Control-1	Collagen alpha-1(III) chain OS=Homo sapiens GN=COL3A1 PE=1 SV=4	P02461	1	70	174	269	0.00328	0.581	GSpGAQGPPGApGPLGIAGITGAR	0.997	57.2	27.9	11.9		p3: Oxidation (+15.99), p12: Oxidation (+15.99)	696.7	2087.08	3	1.174	1487300
Control-1	Collagen alpha-1(III) chain OS=Homo sapiens GN=COL3A1 PE=1 SV=4	P02461	1	70	174	269	0.00328	0.581	GSpGAQGPpGAPGPLGIAGITGAR	0.997	27.6	27.9	6.12		p3: Oxidation (+15.99), p9: Oxidation (+15.99)	1044.55	2087.08	2	0.9425	573696
Control-1	Collagen alpha-1(III) chain OS=Homo sapiens GN=COL3A1 PE=1 SV=4	P02461	1	70	174	269	0.00328	0.581	GSpGAQGPpGApGPLGIAGITGAR	0.997	57.6	28.2	8.82		p3: Oxidation (+15.99), p9: Oxidation (+15.99), p12: Oxidation (+15.99)	1052.54	2103.07	2	0.1012	554257
Control-1	Collagen alpha-1(III) chain OS=Homo sapiens GN=COL3A1 PE=1 SV=4	P02461	1	70	174	269	0.00328	0.581	GSPGAQGppGApGPLGIAGITGAR	0.997	37.8	27.9	3.11		p8: Oxidation (+15.99), p9: Oxidation (+15.99), p12: Oxidation (+15.99)	702.032	2103.07	3	1.553	1174570
Control-1	Collagen alpha-1(III) chain OS=Homo sapiens GN=COL3A1 PE=1 SV=4	P02461	1	70	174	269	0.00328	0.581	GSpGAQGppGApGPLGIAGITGAR	0.997	39.1	28.2	11.8		p3: Oxidation (+15.99), p8: Oxidation (+15.99), p9: Oxidation (+15.99), p12: Oxidation (+15.99)	707.363	2119.07	3	0.7934	1860390
Control-1	Collagen alpha-1(III) chain OS=Homo sapiens GN=COL3A1 PE=1 SV=4	P02461	1	70	174	269	0.00328	0.581	GSpGGpGAAGFpGAR	0.978	18.5	25	16.5		p3: Oxidation (+15.99), p6: Oxidation (+15.99), p12: Oxidation (+15.99)	652.305	1302.6	2	0.2248	636704
Control-1	Collagen alpha-1(III) chain OS=Homo sapiens GN=COL3A1 PE=1 SV=4	P02461	1	70	174	269	0.00328	0.581	GSpGGpGAAGFpGAR	0.995	26.4	25	26.4		p3: Oxidation (+15.99), p6: Oxidation (+15.99), p12: Oxidation (+15.99)	652.307	1302.6	2	2.557	436623
Control-1	Collagen alpha-1(III) chain OS=Homo sapiens GN=COL3A1 PE=1 SV=4	P02461	1	70	174	269	0.00328	0.581	GSpGGPGAAGFpGAR	0.996	31.5	25.7	3.86		p3: Oxidation (+15.99), p12: Oxidation (+15.99)	644.306	1286.6	2	-2.029	560841
Control-1	Collagen alpha-1(III) chain OS=Homo sapiens GN=COL3A1 PE=1 SV=4	P02461	1	70	174	269	0.00328	0.581	GSpGGpGAAGFpGAR	0.997	63.4	25	52.3		p3: Oxidation (+15.99), p6: Oxidation (+15.99), p12: Oxidation (+15.99)	652.305	1302.6	2	0.3168	4766300
Control-1	Collagen alpha-1(III) chain OS=Homo sapiens GN=COL3A1 PE=1 SV=4	P02461	1	70	174	269	0.00328	0.581	GSpGGpGAAGFpGAR	0.997	53.4	25	52.3		p3: Oxidation (+15.99), p6: Oxidation (+15.99), p12: Oxidation (+15.99)	652.305	1302.6	2	0.3168	1118350
Control-1	Collagen alpha-1(III) chain OS=Homo sapiens GN=COL3A1 PE=1 SV=4	P02461	1	70	174	269	0.00328	0.581	GSpGGpGAAGFpGAR	0.997	45.5	25	34.7		p3: Oxidation (+15.99), p6: Oxidation (+15.99), p12: Oxidation (+15.99)	652.306	1302.6	2	0.7771	1154350
Control-1	Collagen alpha-1(III) chain OS=Homo sapiens GN=COL3A1 PE=1 SV=4	P02461	1	70	174	269	0.00328	0.581	GSpGPQGVkGESGKpGANGLSGER	0.997	25.7	27.7	4.37		p3: Oxidation (+15.99), k9: Oxidation (+15.99), p15: Oxidation (+15.99)	757.704	2270.09	3	0.756	332076
Control-1	Collagen alpha-1(III) chain OS=Homo sapiens GN=COL3A1 PE=1 SV=4	P02461	1	70	174	269	0.00328	0.581	GSpGPQGVkGESGKpGANGLSGER	0.997	42.5	27.9	6.03		p3: Oxidation (+15.99), k9: Oxidation (+15.99), p15: Oxidation (+15.99)	1136.05	2270.09	2	1.873	66470.1
Control-1	Collagen alpha-1(III) chain OS=Homo sapiens GN=COL3A1 PE=1 SV=4	P02461	1	70	174	269	0.00328	0.581	NGEkGETGApGLK	0.996	41	26.8	3.4		k4: Oxidation (+15.99), p10: Oxidation (+15.99)	645.322	1288.63	2	3.03	131477
Control-1	Collagen alpha-1(III) chain OS=Homo sapiens GN=COL3A1 PE=1 SV=4	P02461	1	70	174	269	0.00328	0.581	NGETGPQGPpGPTGPGGDK	0.997	29.2	25.1	7.58		p10: Oxidation (+15.99)	868.4	1734.79	2	2.387	141145
Control-1	Collagen alpha-1(III) chain OS=Homo sapiens GN=COL3A1 PE=1 SV=4	P02461	1	70	174	269	0.00328	0.581	SGDRGESGPAGpAGAPGpAGSR	0.98	19.1	25.4	1.2		p12: Oxidation (+15.99), p18: Oxidation (+15.99)	647.3	1938.88	3	0.1969	230523
Control-1	Collagen alpha-1(III) chain OS=Homo sapiens GN=COL3A1 PE=1 SV=4	P02461	1	70	174	269	0.00328	0.581	SGDRGESGPAGpAGApGPAGSR	0.995	24.2	25.5	3.82		p12: Oxidation (+15.99), p16: Oxidation (+15.99)	970.446	1938.88	2	-0.07833	51294.7
Control-1	Collagen alpha-1(III) chain OS=Homo sapiens GN=COL3A1 PE=1 SV=4	P02461	1	70	174	269	0.00328	0.581	SGDRGESGPAGPAGApGPAGSR	0.997	28.1	26.1	3.45		p16: Oxidation (+15.99)	641.969	1922.89	3	1.397	505716
Control-1	Collagen alpha-1(III) chain OS=Homo sapiens GN=COL3A1 PE=1 SV=4	P02461	1	70	174	269	0.00328	0.581	SGDRGESGPAGPAGApGPAGSR	0.997	29	26	8.74		p16: Oxidation (+15.99)	641.968	1922.88	3	-0.225	574896
Control-1	Collagen alpha-1(III) chain OS=Homo sapiens GN=COL3A1 PE=1 SV=4	P02461	1	70	174	269	0.00328	0.581	SGDRGESGPAGPAGApGPAGSR	0.997	30.2	25.8	11.2		p16: Oxidation (+15.99)	641.969	1922.88	3	0.7262	237198
Control-1	Collagen alpha-1(III) chain OS=Homo sapiens GN=COL3A1 PE=1 SV=4	P02461	1	70	174	269	0.00328	0.581	SGDRGESGPAGPAGApGPAGSR	0.997	43	25.9	6.71		p16: Oxidation (+15.99)	962.449	1922.88	2	0.3862	69644.6
Control-1	Collagen alpha-1(III) chain OS=Homo sapiens GN=COL3A1 PE=1 SV=4	P02461	1	70	174	269	0.00328	0.581	SGDRGESGPAGPAGApGPAGSR	0.997	41.4	25.9	17.3		p16: Oxidation (+15.99)	641.969	1922.88	3	0.2584	738274
Control-1	Collagen alpha-1(III) chain OS=Homo sapiens GN=COL3A1 PE=1 SV=4	P02461	1	70	174	269	0.00328	0.581	SGDRGESGPAGPAGApGPAGSR	0.997	38	25.9	6.93		p16: Oxidation (+15.99)	641.969	1922.88	3	0.4455	399696
Control-1	Collagen alpha-1(III) chain OS=Homo sapiens GN=COL3A1 PE=1 SV=4	P02461	1	70	174	269	0.00328	0.581	SGDRGESGPAGPAGApGpAGSR	0.997	39	25.4	26.4		p16: Oxidation (+15.99), p18: Oxidation (+15.99)	647.299	1938.88	3	-1.411	278237
Control-1	Collagen alpha-1(III) chain OS=Homo sapiens GN=COL3A1 PE=1 SV=4	P02461	1	70	174	269	0.00328	0.581	SGDRGESGPAGPAGAPGPAGSRGApGpQGPR	0.988	23.5	27.4	1.44		p25: Oxidation (+15.99), p27: Oxidation (+15.99)	690.081	2756.3	4	-0.4294	593393
Control-1	Collagen alpha-1(II) chain OS=Homo sapiens GN=COL2A1 PE=1 SV=3	P02458	1	2	3	19	0.000232	0.0403	GAQGppGATGFpGAAGR	0.997	36.1	25.8	23.4		p5: Oxidation (+15.99), p6: Oxidation (+15.99), p12: Oxidation (+15.99)	506.243	1515.71	3	0.2486	1453440
Control-1	Collagen alpha-1(II) chain OS=Homo sapiens GN=COL2A1 PE=1 SV=3	P02458	1	2	3	19	0.000232	0.0403	GAQGppGATGFpGAAGR	0.997	36.4	25.8	24.1		p5: Oxidation (+15.99), p6: Oxidation (+15.99), p12: Oxidation (+15.99)	758.861	1515.71	2	0.4569	6605900
Control-1	Collagen alpha-1(II) chain OS=Homo sapiens GN=COL2A1 PE=1 SV=3	P02458	1	2	3	19	0.000232	0.0403	GFpGLpGPSGEPGK	0.997	27.7	26.1	12.2		p3: Oxidation (+15.99), p6: Oxidation (+15.99)	664.828	1327.64	2	-0.08427	858818	P02452
Control-1	Collagen alpha-1(II) chain OS=Homo sapiens GN=COL2A1 PE=1 SV=3	P02458	1	2	3	19	0.000232	0.0403	GFpGLpGPSGEPGk	0.997	44.3	26.4	0		p3: Oxidation (+15.99), p6: Oxidation (+15.99), k14: Oxidation (+15.99)	672.826	1343.64	2	1.155	1931920	P02452
Control-1	Collagen alpha-1(II) chain OS=Homo sapiens GN=COL2A1 PE=1 SV=3	P02458	1	2	3	19	0.000232	0.0403	GFpGLPGPSGEPGK	0.997	29.8	26.4	21		p3: Oxidation (+15.99)	656.83	1311.65	2	-0.2415	1177020	P02452
Control-1	Collagen alpha-1(II) chain OS=Homo sapiens GN=COL2A1 PE=1 SV=3	P02458	1	2	3	19	0.000232	0.0403	GFpGLpGPSGEPGk	0.997	47.7	26.3	0		p3: Oxidation (+15.99), p6: Oxidation (+15.99), k14: Oxidation (+15.99)	672.826	1343.64	2	0.6046	21607400	P02452
Control-1	Collagen alpha-1(II) chain OS=Homo sapiens GN=COL2A1 PE=1 SV=3	P02458	1	2	3	19	0.000232	0.0403	GFPGLpGPSGEPGk	0.997	30.6	26.1	0		p6: Oxidation (+15.99), k14: Oxidation (+15.99)	664.828	1327.64	2	0.277	2327220	P02452
Control-1	Collagen alpha-1(II) chain OS=Homo sapiens GN=COL2A1 PE=1 SV=3	P02458	1	2	3	19	0.000232	0.0403	GFPGLPGPSGEPGk	0.997	33.2	26.4	0		k14: Oxidation (+15.99)	656.831	1311.65	2	0.5965	2009900	P02452
Control-1	Collagen alpha-1(II) chain OS=Homo sapiens GN=COL2A1 PE=1 SV=3	P02458	1	2	3	19	0.000232	0.0403	GFpGLpGPSGEPGK	0.997	34.7	26.1	9.62		p3: Oxidation (+15.99), p6: Oxidation (+15.99)	664.828	1327.64	2	0.277	6783780	P02452
Control-1	Collagen alpha-1(II) chain OS=Homo sapiens GN=COL2A1 PE=1 SV=3	P02458	1	2	3	19	0.000232	0.0403	GFpGLpGPSGEpGK	0.997	36	25.8	3.27		p3: Oxidation (+15.99), p6: Oxidation (+15.99), p12: Oxidation (+15.99)	672.826	1343.64	2	0.2477	2082090	P02452
Control-1	Collagen alpha-1(II) chain OS=Homo sapiens GN=COL2A1 PE=1 SV=3	P02458	1	2	3	19	0.000232	0.0403	GPpGPQGAR	0.996	25.1	25.4	16.4		p3: Oxidation (+15.99)	426.72	851.425	2	-0.7003	297403	P02452
Control-1	Collagen alpha-1(II) chain OS=Homo sapiens GN=COL2A1 PE=1 SV=3	P02458	1	2	3	19	0.000232	0.0403	GQpGVmGFpGPK	0.973	19.1	25.6	7.15		p3: Oxidation (+15.99), m6: Oxidation (+15.99), p9: Oxidation (+15.99)	610.293	1218.57	2	1.126	1897760	P02461
Control-1	Collagen alpha-1(II) chain OS=Homo sapiens GN=COL2A1 PE=1 SV=3	P02458	1	2	3	19	0.000232	0.0403	GQpGVmGFpGPK	0.99	22.9	25.7	7.96		p3: Oxidation (+15.99), m6: Oxidation (+15.99), p9: Oxidation (+15.99)	610.293	1218.57	2	1.027	945876	P02461
Control-1	Collagen alpha-1(II) chain OS=Homo sapiens GN=COL2A1 PE=1 SV=3	P02458	1	2	3	19	0.000232	0.0403	GQpGVmGFpGPk	0.995	24.1	25	0		p3: Oxidation (+15.99), m6: Oxidation (+15.99), p9: Oxidation (+15.99), k12: Oxidation (+15.99)	618.29	1234.57	2	-0.293	784735	P02461
Control-1	Collagen alpha-1(II) chain OS=Homo sapiens GN=COL2A1 PE=1 SV=3	P02458	1	2	3	19	0.000232	0.0403	GQpGVmGFpGPK	0.997	27	25.3	7.17		p3: Oxidation (+15.99), m6: Oxidation (+15.99), p9: Oxidation (+15.99)	610.292	1218.57	2	-0.7765	1249130	P02461
Control-1	Collagen alpha-1(II) chain OS=Homo sapiens GN=COL2A1 PE=1 SV=3	P02458	1	2	3	19	0.000232	0.0403	GQpGVmGFpGPK	0.997	25.7	25.1	8.01		p3: Oxidation (+15.99), m6: Oxidation (+15.99), p9: Oxidation (+15.99)	610.293	1218.57	2	0.7322	5366820	P02461
Control-1	Collagen alpha-1(II) chain OS=Homo sapiens GN=COL2A1 PE=1 SV=3	P02458	1	2	3	19	0.000232	0.0403	GQpGVmGFpGPk	0.997	31.7	25	0		p3: Oxidation (+15.99), m6: Oxidation (+15.99), p9: Oxidation (+15.99), k12: Oxidation (+15.99)	618.291	1234.57	2	1.18	1549310	P02461
Control-1	Collagen alpha-1(II) chain OS=Homo sapiens GN=COL2A1 PE=1 SV=3	P02458	1	2	3	19	0.000232	0.0403	GQpGVMGFPGPk	0.997	33.1	26	0		p3: Oxidation (+15.99), k12: Oxidation (+15.99)	602.295	1202.58	2	-0.04317	3664260	P02461
Control-1	Collagen alpha-1(II) chain OS=Homo sapiens GN=COL2A1 PE=1 SV=3	P02458	1	2	3	19	0.000232	0.0403	GQpGVMGFPGpKGANGEpGk	0.965	17.7	26.5	0		p3: Oxidation (+15.99), p11: Oxidation (+15.99), p18: Oxidation (+15.99), k20: Oxidation (+15.99)	649.307	1944.9	3	-0.1685	1025550
Control-1	Leiomodin-1 OS=Homo sapiens GN=LMOD1 PE=1 SV=3	P29536	1	10	13	13	0.000159	0.228	DQLLAAIR	0.99	29	25	14.7			450.269	898.524	2	-0.1356	1670860
Control-1	Leiomodin-1 OS=Homo sapiens GN=LMOD1 PE=1 SV=3	P29536	1	10	13	13	0.000159	0.228	EAMLNFcEK	0.997	38.1	25	38.1	c7: Carbamidomethyl (+57.02)		571.253	1140.49	2	-2.091	1324660
Control-1	Leiomodin-1 OS=Homo sapiens GN=LMOD1 PE=1 SV=3	P29536	1	10	13	13	0.000159	0.228	ELDVVDPDGSVPVGLR	0.984	21.3	27.5	17.4			833.937	1665.86	2	0.7187	867499
Control-1	Leiomodin-1 OS=Homo sapiens GN=LMOD1 PE=1 SV=3	P29536	1	10	13	13	0.000159	0.228	FTEALEFNTVVK	0.997	27.3	27.2	25.9			699.369	1396.72	2	-0.0157	1167370
Control-1	Leiomodin-1 OS=Homo sapiens GN=LMOD1 PE=1 SV=3	P29536	1	10	13	13	0.000159	0.228	GSPKPSPQPSPKPSPK	0.996	33.5	26.7	33.5			808.446	1614.88	2	3.019	160573
Control-1	Leiomodin-1 OS=Homo sapiens GN=LMOD1 PE=1 SV=3	P29536	1	10	13	13	0.000159	0.228	GSPKPSPQPSPKPSPK	0.997	31.1	27.4	31.1			539.298	1614.87	3	-0.271	336084
Control-1	Leiomodin-1 OS=Homo sapiens GN=LMOD1 PE=1 SV=3	P29536	1	10	13	13	0.000159	0.228	KGGAPAAPPPPPPPLAPPLIMENLK	0.986	22.2	25	22.2			824.136	2469.39	3	1.369	1641030
Control-1	Leiomodin-1 OS=Homo sapiens GN=LMOD1 PE=1 SV=3	P29536	1	10	13	13	0.000159	0.228	LGYHFELAGPR	0.997	43	27.8	41.2			420.556	1258.65	3	0.1604	1270040
Control-1	Leiomodin-1 OS=Homo sapiens GN=LMOD1 PE=1 SV=3	P29536	1	10	13	13	0.000159	0.228	mTVTNLLSR	0.978	20.1	27.2	6.71		m1: Oxidation (+15.99)	525.784	1049.55	2	-0.2827	1095370
Control-1	Leiomodin-1 OS=Homo sapiens GN=LMOD1 PE=1 SV=3	P29536	1	10	13	13	0.000159	0.228	MTVTNLLSR	0.997	45.1	27.4	39.8			517.786	1033.56	2	-0.8331	2156120
Control-1	Leiomodin-1 OS=Homo sapiens GN=LMOD1 PE=1 SV=3	P29536	1	10	13	13	0.000159	0.228	QTPSGPTKPSEGPAK	0.997	36.6	28.1	33.7			741.385	1480.75	2	1.443	181491
Control-1	Leiomodin-1 OS=Homo sapiens GN=LMOD1 PE=1 SV=3	P29536	1	10	13	13	0.000159	0.228	VEEEAAPSIFDEPLER	0.997	30.9	27.2	29.5			610.963	1829.87	3	-0.3812	906531
Control-1	Leiomodin-1 OS=Homo sapiens GN=LMOD1 PE=1 SV=3	P29536	1	10	13	13	0.000159	0.228	VEEEAAPSIFDEPLER	0.997	39.6	27.5	37.4			915.943	1829.87	2	2.085	688712
Control-1	Collagen alpha-1(I) chain OS=Homo sapiens GN=COL1A1 PE=1 SV=5	P02452	1	73	223	353	0.00431	0.641	DGEAGAQGPPGPAGPAGER	0.99	84.7	25.2	84.2			845.893	1689.77	2	0.5903	2316570
Control-1	Collagen alpha-1(I) chain OS=Homo sapiens GN=COL1A1 PE=1 SV=5	P02452	1	73	223	353	0.00431	0.641	DGEAGAQGppGPAGPAGER	0.994	23.3	25	4.14		p9: Oxidation (+15.99), p10: Oxidation (+15.99)	574.928	1721.76	3	-0.04525	533072
Control-1	Collagen alpha-1(I) chain OS=Homo sapiens GN=COL1A1 PE=1 SV=5	P02452	1	73	223	353	0.00431	0.641	DGEAGAQGPpGPAGPAGER	0.994	73.7	25	12		p10: Oxidation (+15.99)	853.891	1705.77	2	1.279	639620
Control-1	Collagen alpha-1(I) chain OS=Homo sapiens GN=COL1A1 PE=1 SV=5	P02452	1	73	223	353	0.00431	0.641	DGEAGAQGPPGPAGPAGER	0.996	24.3	25	24.3			564.264	1689.77	3	-0.2472	1069970
Control-1	Collagen alpha-1(I) chain OS=Homo sapiens GN=COL1A1 PE=1 SV=5	P02452	1	73	223	353	0.00431	0.641	DGEAGAQGPpGPAGPAGER	0.997	59.9	25	10.4		p10: Oxidation (+15.99)	853.892	1705.77	2	1.924	615722
Control-1	Collagen alpha-1(I) chain OS=Homo sapiens GN=COL1A1 PE=1 SV=5	P02452	1	73	223	353	0.00431	0.641	DGEAGAQGPpGPAGPAGER	0.997	54.5	25	9.46		p10: Oxidation (+15.99)	569.597	1705.77	3	2.061	2194320
Control-1	Collagen alpha-1(I) chain OS=Homo sapiens GN=COL1A1 PE=1 SV=5	P02452	1	73	223	353	0.00431	0.641	DGEAGAQGPpGPAGPAGER	0.997	54.5	25	9.71		p10: Oxidation (+15.99)	569.596	1705.77	3	0.02171	2007720
Control-1	Collagen alpha-1(I) chain OS=Homo sapiens GN=COL1A1 PE=1 SV=5	P02452	1	73	223	353	0.00431	0.641	DGEAGAQGPpGPAGpAGER	0.997	39.6	25	7.62		p10: Oxidation (+15.99), p15: Oxidation (+15.99)	861.889	1721.76	2	1.386	191335
Control-1	Collagen alpha-1(I) chain OS=Homo sapiens GN=COL1A1 PE=1 SV=5	P02452	1	73	223	353	0.00431	0.641	DGEAGAQGPpGPAGPAGER	0.997	42.4	25	0.06		p10: Oxidation (+15.99)	853.891	1705.77	2	0.8455	2443230
Control-1	Collagen alpha-1(I) chain OS=Homo sapiens GN=COL1A1 PE=1 SV=5	P02452	1	73	223	353	0.00431	0.641	DGEAGAQGppGPAGPAGER	0.997	37.8	25	7.42		p9: Oxidation (+15.99), p10: Oxidation (+15.99)	861.889	1721.76	2	1.235	243269
Control-1	Collagen alpha-1(I) chain OS=Homo sapiens GN=COL1A1 PE=1 SV=5	P02452	1	73	223	353	0.00431	0.641	DGEAGAQGPPGPAGPAGERGEQGPAGSPGFQGLPGpAGppGEAGkpGEQGVpGDLGApGPSGAR	0.978	19.8	25	7.16		p36: Oxidation (+15.99), p39: Oxidation (+15.99), p40: Oxidation (+15.99), k45: Oxidation (+15.99), p46: Oxidation (+15.99), p52: Oxidation (+15.99), p58: Oxidation (+15.99)	1450.93	5799.67	4	1.262	1111040
Control-1	Collagen alpha-1(I) chain OS=Homo sapiens GN=COL1A1 PE=1 SV=5	P02452	1	73	223	353	0.00431	0.641	DGLNGLPGPIGPpGpR	0.996	34.1	28.1	6.62		p13: Oxidation (+15.99), p15: Oxidation (+15.99)	773.403	1544.79	2	-1.936	967512
Control-1	Collagen alpha-1(I) chain OS=Homo sapiens GN=COL1A1 PE=1 SV=5	P02452	1	73	223	353	0.00431	0.641	DGSPGAKGDRGETGpAGppGApGApGApGPVGPAGK	0.993	25.6	26.9	20.9		p15: Oxidation (+15.99), p18: Oxidation (+15.99), p19: Oxidation (+15.99), p22: Oxidation (+15.99), p25: Oxidation (+15.99), p28: Oxidation (+15.99)	790.127	3156.48	4	2.076	1197060
Control-1	Collagen alpha-1(I) chain OS=Homo sapiens GN=COL1A1 PE=1 SV=5	P02452	1	73	223	353	0.00431	0.641	EGApGAEGSpGRDGSpGAK	0.981	88.3	25	22.2		p4: Oxidation (+15.99), p10: Oxidation (+15.99), p16: Oxidation (+15.99)	872.892	1743.77	2	1.406	105068
Control-1	Collagen alpha-1(I) chain OS=Homo sapiens GN=COL1A1 PE=1 SV=5	P02452	1	73	223	353	0.00431	0.641	EGApGAEGSPGRDGSpGAk	0.996	24.1	25	2.72		p4: Oxidation (+15.99), p16: Oxidation (+15.99), k19: Oxidation (+15.99)	582.263	1743.77	3	0.2849	102856
Control-1	Collagen alpha-1(I) chain OS=Homo sapiens GN=COL1A1 PE=1 SV=5	P02452	1	73	223	353	0.00431	0.641	EGAPGAEGSpGRDGSpGAK	0.997	42.8	25	1.84		p10: Oxidation (+15.99), p16: Oxidation (+15.99)	864.893	1727.77	2	0.5947	97253.9
Control-1	Collagen alpha-1(I) chain OS=Homo sapiens GN=COL1A1 PE=1 SV=5	P02452	1	73	223	353	0.00431	0.641	EGApGAEGSpGRDGSPGAkGDR	0.991	23.3	25	0		p4: Oxidation (+15.99), p10: Oxidation (+15.99), k19: Oxidation (+15.99)	691.646	2071.91	3	-0.4983	75179.8
Control-1	Collagen alpha-1(I) chain OS=Homo sapiens GN=COL1A1 PE=1 SV=5	P02452	1	73	223	353	0.00431	0.641	EGApGAEGSpGRDGSpGAkGDR	0.992	22.7	25	21		p4: Oxidation (+15.99), p10: Oxidation (+15.99), p16: Oxidation (+15.99), k19: Oxidation (+15.99)	696.978	2087.91	3	0.4127	58597.5
Control-1	Collagen alpha-1(I) chain OS=Homo sapiens GN=COL1A1 PE=1 SV=5	P02452	1	73	223	353	0.00431	0.641	GAAGLpGPK	0.996	27	25	12.3		p6: Oxidation (+15.99)	392.223	782.431	2	2.786	2182160
Control-1	Collagen alpha-1(I) chain OS=Homo sapiens GN=COL1A1 PE=1 SV=5	P02452	1	73	223	353	0.00431	0.641	GAAGLpGPK	0.997	35.5	25	20.6		p6: Oxidation (+15.99)	392.222	782.429	2	0.05495	1570390
Control-1	Collagen alpha-1(I) chain OS=Homo sapiens GN=COL1A1 PE=1 SV=5	P02452	1	73	223	353	0.00431	0.641	GAAGLpGpKGDR	0.997	35.9	26.2	1.04		p6: Oxidation (+15.99), p8: Oxidation (+15.99)	564.294	1126.57	2	-0.3831	1324810
Control-1	Collagen alpha-1(I) chain OS=Homo sapiens GN=COL1A1 PE=1 SV=5	P02452	1	73	223	353	0.00431	0.641	GAAGLpGPkGDRGDAGPK	0.97	20.5	28.2	0		p6: Oxidation (+15.99), k9: Oxidation (+15.99)	413.964	1651.83	4	-0.5832	1090570
Control-1	Collagen alpha-1(I) chain OS=Homo sapiens GN=COL1A1 PE=1 SV=5	P02452	1	73	223	353	0.00431	0.641	GAAGLpGpKGDRGDAGPK	0.996	25.7	28.2	0.06		p6: Oxidation (+15.99), p8: Oxidation (+15.99)	826.921	1651.83	2	-0.1161	125791
Control-1	Collagen alpha-1(I) chain OS=Homo sapiens GN=COL1A1 PE=1 SV=5	P02452	1	73	223	353	0.00431	0.641	GAAGLpGPkGDRGDAGPK	0.997	39.5	28.2	6.11		p6: Oxidation (+15.99), k9: Oxidation (+15.99)	551.617	1651.83	3	-0.01692	1465310
Control-1	Collagen alpha-1(I) chain OS=Homo sapiens GN=COL1A1 PE=1 SV=5	P02452	1	73	223	353	0.00431	0.641	GANGApGIAGApGFpGAR	0.997	29.5	27.6	28.5		p6: Oxidation (+15.99), p12: Oxidation (+15.99), p15: Oxidation (+15.99)	793.39	1584.77	2	1.017	754467
Control-1	Collagen alpha-1(I) chain OS=Homo sapiens GN=COL1A1 PE=1 SV=5	P02452	1	73	223	353	0.00431	0.641	GANGApGNDGAkGDAGApGApGSQGApGLQGMpGER	0.993	34.6	25	4.17		p6: Oxidation (+15.99), k12: Oxidation (+15.99), p18: Oxidation (+15.99), p21: Oxidation (+15.99), p27: Oxidation (+15.99), p33: Oxidation (+15.99)	1080.82	3239.44	3	9.422	254014
Control-1	Collagen alpha-1(I) chain OS=Homo sapiens GN=COL1A1 PE=1 SV=5	P02452	1	73	223	353	0.00431	0.641	GANGApGNDGAKGDAGApGApGSQGApGLQGMpGER	0.996	25	25	1.33		p6: Oxidation (+15.99), p18: Oxidation (+15.99), p21: Oxidation (+15.99), p27: Oxidation (+15.99), p33: Oxidation (+15.99)	1075.48	3223.42	3	-0.9996	162121
Control-1	Collagen alpha-1(I) chain OS=Homo sapiens GN=COL1A1 PE=1 SV=5	P02452	1	73	223	353	0.00431	0.641	GANGApGNDGAkGDAGApGApGSQGApGLQGMpGER	0.997	24.4	25	3.33		p6: Oxidation (+15.99), k12: Oxidation (+15.99), p18: Oxidation (+15.99), p21: Oxidation (+15.99), p27: Oxidation (+15.99), p33: Oxidation (+15.99)	1080.81	3239.42	3	0.6086	391924
Control-1	Collagen alpha-1(I) chain OS=Homo sapiens GN=COL1A1 PE=1 SV=5	P02452	1	73	223	353	0.00431	0.641	GANGApGNDGAkGDAGApGApGSQGApGLQGMpGER	0.997	31.7	25	3		p6: Oxidation (+15.99), k12: Oxidation (+15.99), p18: Oxidation (+15.99), p21: Oxidation (+15.99), p27: Oxidation (+15.99), p33: Oxidation (+15.99)	1080.81	3239.41	3	-1.308	273803
Control-1	Collagen alpha-1(I) chain OS=Homo sapiens GN=COL1A1 PE=1 SV=5	P02452	1	73	223	353	0.00431	0.641	GANGApGNDGAkGDAGApGApGSQGApGLQGmpGER	0.997	31.7	25	28.8		p6: Oxidation (+15.99), k12: Oxidation (+15.99), p18: Oxidation (+15.99), p21: Oxidation (+15.99), p27: Oxidation (+15.99), m32: Oxidation (+15.99), p33: Oxidation (+15.99)	1086.14	3255.41	3	-0.609	162520
Control-1	Collagen alpha-1(I) chain OS=Homo sapiens GN=COL1A1 PE=1 SV=5	P02452	1	73	223	353	0.00431	0.641	GANGApGNDGAkGDAGApGApGSQGApGLQGMpGER	0.997	38	25	2.85		p6: Oxidation (+15.99), k12: Oxidation (+15.99), p18: Oxidation (+15.99), p21: Oxidation (+15.99), p27: Oxidation (+15.99), p33: Oxidation (+15.99)	1080.81	3239.41	3	-1.993	661823
Control-1	Collagen alpha-1(I) chain OS=Homo sapiens GN=COL1A1 PE=1 SV=5	P02452	1	73	223	353	0.00431	0.641	GApGDRGEpGpPGPAGFAGPPGADGQpGAk	0.983	20.3	25.7	7.93		p3: Oxidation (+15.99), p9: Oxidation (+15.99), p11: Oxidation (+15.99), p27: Oxidation (+15.99), k30: Oxidation (+15.99)	1360.12	2718.23	2	0.8543	79619.1
Control-1	Collagen alpha-1(I) chain OS=Homo sapiens GN=COL1A1 PE=1 SV=5	P02452	1	73	223	353	0.00431	0.641	GApGDRGEpGpPGPAGFAGPPGADGQpGAk	0.983	20.9	25.7	11.6		p3: Oxidation (+15.99), p9: Oxidation (+15.99), p11: Oxidation (+15.99), p27: Oxidation (+15.99), k30: Oxidation (+15.99)	680.564	2718.23	4	-0.09156	1183660
Control-1	Collagen alpha-1(I) chain OS=Homo sapiens GN=COL1A1 PE=1 SV=5	P02452	1	73	223	353	0.00431	0.641	GApGDRGEpGpPGPAGFAGPPGADGQpGAk	0.997	40.8	25.8	31.1		p3: Oxidation (+15.99), p9: Oxidation (+15.99), p11: Oxidation (+15.99), p27: Oxidation (+15.99), k30: Oxidation (+15.99)	907.085	2718.23	3	1.543	3055470
Control-1	Collagen alpha-1(I) chain OS=Homo sapiens GN=COL1A1 PE=1 SV=5	P02452	1	73	223	353	0.00431	0.641	GApGDRGEpGpPGPAGFAGPPGADGQpGAk	0.997	29	25.7	29		p3: Oxidation (+15.99), p9: Oxidation (+15.99), p11: Oxidation (+15.99), p27: Oxidation (+15.99), k30: Oxidation (+15.99)	907.084	2718.23	3	0.8043	616228
Control-1	Collagen alpha-1(I) chain OS=Homo sapiens GN=COL1A1 PE=1 SV=5	P02452	1	73	223	353	0.00431	0.641	GApGDRGEpGpPGPAGFAGPPGADGQPGAk	0.997	28.2	26.1	9.62		p3: Oxidation (+15.99), p9: Oxidation (+15.99), p11: Oxidation (+15.99), k30: Oxidation (+15.99)	901.752	2702.23	3	0.1746	1274530
Control-1	Collagen alpha-1(I) chain OS=Homo sapiens GN=COL1A1 PE=1 SV=5	P02452	1	73	223	353	0.00431	0.641	GApGDRGEpGppGPAGFAGPpGADGQpGAk	0.997	33.8	25	7.36		p3: Oxidation (+15.99), p9: Oxidation (+15.99), p11: Oxidation (+15.99), p12: Oxidation (+15.99), p21: Oxidation (+15.99), p27: Oxidation (+15.99), k30: Oxidation (+15.99)	917.747	2750.22	3	1.06	348854
Control-1	Collagen alpha-1(I) chain OS=Homo sapiens GN=COL1A1 PE=1 SV=5	P02452	1	73	223	353	0.00431	0.641	GApGDRGEpGpPGPAGFAGPPGADGQPGAkGEpGDAGAk	0.997	27.3	25	19.7		p3: Oxidation (+15.99), p9: Oxidation (+15.99), p11: Oxidation (+15.99), k30: Oxidation (+15.99), p33: Oxidation (+15.99), k39: Oxidation (+15.99)	880.152	3516.58	4	0.4935	1328930
Control-1	Collagen alpha-1(I) chain OS=Homo sapiens GN=COL1A1 PE=1 SV=5	P02452	1	73	223	353	0.00431	0.641	GARGSAGPpGATGFpGAAGR	0.97	20.3	26.9	7.16		p9: Oxidation (+15.99), p15: Oxidation (+15.99)	581.955	1742.84	3	-0.6583	491609
Control-1	Collagen alpha-1(I) chain OS=Homo sapiens GN=COL1A1 PE=1 SV=5	P02452	1	73	223	353	0.00431	0.641	GDAGApGApGSQGApGLQGmpGER	0.981	20.3	25	20.3		p6: Oxidation (+15.99), p9: Oxidation (+15.99), p15: Oxidation (+15.99), m20: Oxidation (+15.99), p21: Oxidation (+15.99)	738.994	2213.96	3	-0.3761	2587930
Control-1	Collagen alpha-1(I) chain OS=Homo sapiens GN=COL1A1 PE=1 SV=5	P02452	1	73	223	353	0.00431	0.641	GDAGApGApGSQGApGLQGmpGER	0.984	20.2	25	20.2		p6: Oxidation (+15.99), p9: Oxidation (+15.99), p15: Oxidation (+15.99), m20: Oxidation (+15.99), p21: Oxidation (+15.99)	738.995	2213.96	3	0.6127	733147
Control-1	Collagen alpha-1(I) chain OS=Homo sapiens GN=COL1A1 PE=1 SV=5	P02452	1	73	223	353	0.00431	0.641	GDAGApGApGSQGApGLQGMpGER	0.994	48.6	25	11.6		p6: Oxidation (+15.99), p9: Oxidation (+15.99), p15: Oxidation (+15.99), p21: Oxidation (+15.99)	1099.99	2197.97	2	3.583	528212
Control-1	Collagen alpha-1(I) chain OS=Homo sapiens GN=COL1A1 PE=1 SV=5	P02452	1	73	223	353	0.00431	0.641	GDAGApGApGSQGApGLQGmpGER	0.997	48.4	25	47.5		p6: Oxidation (+15.99), p9: Oxidation (+15.99), p15: Oxidation (+15.99), m20: Oxidation (+15.99), p21: Oxidation (+15.99)	1107.99	2213.97	2	1.997	201721
Control-1	Collagen alpha-1(I) chain OS=Homo sapiens GN=COL1A1 PE=1 SV=5	P02452	1	73	223	353	0.00431	0.641	GDAGApGApGSQGApGLQGMpGER	0.997	28.2	25	4.62		p6: Oxidation (+15.99), p9: Oxidation (+15.99), p15: Oxidation (+15.99), p21: Oxidation (+15.99)	733.664	2197.97	3	1.911	2146070
Control-1	Collagen alpha-1(I) chain OS=Homo sapiens GN=COL1A1 PE=1 SV=5	P02452	1	73	223	353	0.00431	0.641	GDAGApGApGSQGApGLQGMpGER	0.997	31.3	25	1.85		p6: Oxidation (+15.99), p9: Oxidation (+15.99), p15: Oxidation (+15.99), p21: Oxidation (+15.99)	733.664	2197.97	3	1.911	894517
Control-1	Collagen alpha-1(I) chain OS=Homo sapiens GN=COL1A1 PE=1 SV=5	P02452	1	73	223	353	0.00431	0.641	GDAGApGApGSQGApGLQGmpGER	0.997	25.9	25	25.9		p6: Oxidation (+15.99), p9: Oxidation (+15.99), p15: Oxidation (+15.99), m20: Oxidation (+15.99), p21: Oxidation (+15.99)	1107.99	2213.96	2	1.229	489107
Control-1	Collagen alpha-1(I) chain OS=Homo sapiens GN=COL1A1 PE=1 SV=5	P02452	1	73	223	353	0.00431	0.641	GDAGApGApGSQGApGLQGmpGER	0.997	59.7	25	59.7		p6: Oxidation (+15.99), p9: Oxidation (+15.99), p15: Oxidation (+15.99), m20: Oxidation (+15.99), p21: Oxidation (+15.99)	1107.99	2213.96	2	-0.09796	168997
Control-1	Collagen alpha-1(I) chain OS=Homo sapiens GN=COL1A1 PE=1 SV=5	P02452	1	73	223	353	0.00431	0.641	GDAGApGApGSQGApGLQGMpGER	0.997	33.9	25	5.08		p6: Oxidation (+15.99), p9: Oxidation (+15.99), p15: Oxidation (+15.99), p21: Oxidation (+15.99)	1099.99	2197.97	2	1.363	253771
Control-1	Collagen alpha-1(I) chain OS=Homo sapiens GN=COL1A1 PE=1 SV=5	P02452	1	73	223	353	0.00431	0.641	GDAGApGApGSQGApGLQGmpGER	0.997	45	25	44		p6: Oxidation (+15.99), p9: Oxidation (+15.99), p15: Oxidation (+15.99), m20: Oxidation (+15.99), p21: Oxidation (+15.99)	1107.99	2213.96	2	0.1278	160127
Control-1	Collagen alpha-1(I) chain OS=Homo sapiens GN=COL1A1 PE=1 SV=5	P02452	1	73	223	353	0.00431	0.641	GDAGPAGPKGEpGSpGENGApGQMGPR	0.997	53.5	25	13.8		p12: Oxidation (+15.99), p15: Oxidation (+15.99), p21: Oxidation (+15.99)	831.709	2492.1	3	2.149	1757160
Control-1	Collagen alpha-1(I) chain OS=Homo sapiens GN=COL1A1 PE=1 SV=5	P02452	1	73	223	353	0.00431	0.641	GDAGPAGPkGEpGSpGENGApGQMGPR	0.997	48	25	15.4		k9: Oxidation (+15.99), p12: Oxidation (+15.99), p15: Oxidation (+15.99), p21: Oxidation (+15.99)	1255.06	2508.1	2	1.737	102813
Control-1	Collagen alpha-1(I) chain OS=Homo sapiens GN=COL1A1 PE=1 SV=5	P02452	1	73	223	353	0.00431	0.641	GDAGPAGPKGEpGSpGENGApGQmGPR	0.997	42.8	25	12.4		p12: Oxidation (+15.99), p15: Oxidation (+15.99), p21: Oxidation (+15.99), m24: Oxidation (+15.99)	837.04	2508.1	3	1.073	813309
Control-1	Collagen alpha-1(I) chain OS=Homo sapiens GN=COL1A1 PE=1 SV=5	P02452	1	73	223	353	0.00431	0.641	GDAGPAGPkGEpGSpGENGApGQMGPR	0.997	32.4	25	6.61		k9: Oxidation (+15.99), p12: Oxidation (+15.99), p15: Oxidation (+15.99), p21: Oxidation (+15.99)	837.039	2508.1	3	0.7859	1058360
Control-1	Collagen alpha-1(I) chain OS=Homo sapiens GN=COL1A1 PE=1 SV=5	P02452	1	73	223	353	0.00431	0.641	GDAGPAGPkGEpGSpGENGApGQmGPR	0.997	36.6	25	8.16		k9: Oxidation (+15.99), p12: Oxidation (+15.99), p15: Oxidation (+15.99), p21: Oxidation (+15.99), m24: Oxidation (+15.99)	842.373	2524.1	3	3.207	832723
Control-1	Collagen alpha-1(I) chain OS=Homo sapiens GN=COL1A1 PE=1 SV=5	P02452	1	73	223	353	0.00431	0.641	GDAGPkGADGSPGkDGVR	0.997	39.8	26.3	0		k6: Oxidation (+15.99), k14: Oxidation (+15.99)	836.899	1671.78	2	1.463	75475.7
Control-1	Collagen alpha-1(I) chain OS=Homo sapiens GN=COL1A1 PE=1 SV=5	P02452	1	73	223	353	0.00431	0.641	GDAGPkGADGSpGKDGVR	0.997	27.6	26	2.67		k6: Oxidation (+15.99), p12: Oxidation (+15.99)	558.268	1671.78	3	0.5153	160070
Control-1	Collagen alpha-1(I) chain OS=Homo sapiens GN=COL1A1 PE=1 SV=5	P02452	1	73	223	353	0.00431	0.641	GDAGPKGADGSPGkDGVR	0.997	34.6	26.9	12.1		k14: Oxidation (+15.99)	828.901	1655.79	2	0.7744	53562.5
Control-1	Collagen alpha-1(I) chain OS=Homo sapiens GN=COL1A1 PE=1 SV=5	P02452	1	73	223	353	0.00431	0.641	GDAGppGpAGPAGPPGPIGNVGAPGAk	0.971	18.6	27.7	14.6		p5: Oxidation (+15.99), p6: Oxidation (+15.99), p8: Oxidation (+15.99), k27: Oxidation (+15.99)	766.377	2296.11	3	0.4797	1091400
Control-1	Collagen alpha-1(I) chain OS=Homo sapiens GN=COL1A1 PE=1 SV=5	P02452	1	73	223	353	0.00431	0.641	GDAGPPGPAGpAGpPGPIGNVGAPGAK	0.972	20.7	28.3	11.1		p11: Oxidation (+15.99), p14: Oxidation (+15.99)	755.713	2264.12	3	-0.4715	828332
Control-1	Collagen alpha-1(I) chain OS=Homo sapiens GN=COL1A1 PE=1 SV=5	P02452	1	73	223	353	0.00431	0.641	GDAGpPGPAGPAGPPGPIGNVGApGAk	0.997	28.2	28.1	25.1		p5: Oxidation (+15.99), p24: Oxidation (+15.99), k27: Oxidation (+15.99)	761.045	2280.11	3	-0.992	1328970
Control-1	Collagen alpha-1(I) chain OS=Homo sapiens GN=COL1A1 PE=1 SV=5	P02452	1	73	223	353	0.00431	0.641	GDAGpPGPAGPAGPPGpIGNVGApGAk	0.997	52.8	27.9	45.6		p5: Oxidation (+15.99), p17: Oxidation (+15.99), p24: Oxidation (+15.99), k27: Oxidation (+15.99)	1149.06	2296.11	2	-0.1228	329835
Control-1	Collagen alpha-1(I) chain OS=Homo sapiens GN=COL1A1 PE=1 SV=5	P02452	1	73	223	353	0.00431	0.641	GDAGpPGPAGPAGPPGpIGNVGApGAk	0.997	34.2	27.8	26.6		p5: Oxidation (+15.99), p17: Oxidation (+15.99), p24: Oxidation (+15.99), k27: Oxidation (+15.99)	766.378	2296.11	3	0.7148	11398600
Control-1	Collagen alpha-1(I) chain OS=Homo sapiens GN=COL1A1 PE=1 SV=5	P02452	1	73	223	353	0.00431	0.641	GDAGPPGPAGPAGPpGpIGNVGApGAKGAR	0.968	18.5	28.7	1.18		p15: Oxidation (+15.99), p17: Oxidation (+15.99), p24: Oxidation (+15.99)	855.765	2564.27	3	0.3341	663404
Control-1	Collagen alpha-1(I) chain OS=Homo sapiens GN=COL1A1 PE=1 SV=5	P02452	1	73	223	353	0.00431	0.641	GDAGpPGPAGPAGPPGpIGNVGApGAkGAR	0.997	31.3	28.6	22.8		p5: Oxidation (+15.99), p17: Oxidation (+15.99), p24: Oxidation (+15.99), k27: Oxidation (+15.99)	861.097	2580.27	3	0.578	997051
Control-1	Collagen alpha-1(I) chain OS=Homo sapiens GN=COL1A1 PE=1 SV=5	P02452	1	73	223	353	0.00431	0.641	GDRGETGPAGPpGApGAPGAPGPVGPAGK	0.975	19.3	28.4	4.96		p12: Oxidation (+15.99), p15: Oxidation (+15.99)	827.742	2480.21	3	0.2185	711222
Control-1	Collagen alpha-1(I) chain OS=Homo sapiens GN=COL1A1 PE=1 SV=5	P02452	1	73	223	353	0.00431	0.641	GDRGETGPAGPpGApGApGApGPVGPAGK	0.987	25.8	27.9	24.9		p12: Oxidation (+15.99), p15: Oxidation (+15.99), p18: Oxidation (+15.99), p21: Oxidation (+15.99)	838.404	2512.19	3	-1.392	1558340
Control-1	Collagen alpha-1(I) chain OS=Homo sapiens GN=COL1A1 PE=1 SV=5	P02452	1	73	223	353	0.00431	0.641	GDRGETGPAGPpGApGApGAPGPVGPAGK	0.997	47.3	28.3	9.1		p12: Oxidation (+15.99), p15: Oxidation (+15.99), p18: Oxidation (+15.99)	1249.11	2496.21	2	2.36	83932.3
Control-1	Collagen alpha-1(I) chain OS=Homo sapiens GN=COL1A1 PE=1 SV=5	P02452	1	73	223	353	0.00431	0.641	GDRGETGPAGPpGAPGAPGAPGPVGPAGK	0.997	28.1	28.6	5.2		p12: Oxidation (+15.99)	822.412	2464.21	3	1.532	624132
Control-1	Collagen alpha-1(I) chain OS=Homo sapiens GN=COL1A1 PE=1 SV=5	P02452	1	73	223	353	0.00431	0.641	GDRGETGPAGPpGApGApGAPGPVGPAGK	0.997	30.8	28.3	2.42		p12: Oxidation (+15.99), p15: Oxidation (+15.99), p18: Oxidation (+15.99)	833.075	2496.2	3	1.42	1078400
Control-1	Collagen alpha-1(I) chain OS=Homo sapiens GN=COL1A1 PE=1 SV=5	P02452	1	73	223	353	0.00431	0.641	GDRGETGPAGPpGApGApGAPGPVGPAGK	0.997	42.1	28.3	15.7		p12: Oxidation (+15.99), p15: Oxidation (+15.99), p18: Oxidation (+15.99)	833.075	2496.2	3	1.577	2059180
Control-1	Collagen alpha-1(I) chain OS=Homo sapiens GN=COL1A1 PE=1 SV=5	P02452	1	73	223	353	0.00431	0.641	GDRGETGPAGPpGApGAPGAPGPVGPAGK	0.997	48.5	28.4	18.3		p12: Oxidation (+15.99), p15: Oxidation (+15.99)	1241.11	2480.21	2	0.9141	113288
Control-1	Collagen alpha-1(I) chain OS=Homo sapiens GN=COL1A1 PE=1 SV=5	P02452	1	73	223	353	0.00431	0.641	GDRGETGPAGPpGApGApGAPGPVGPAGK	0.997	29.1	28.2	20		p12: Oxidation (+15.99), p15: Oxidation (+15.99), p18: Oxidation (+15.99)	833.074	2496.2	3	0.02684	618677
Control-1	Collagen alpha-1(I) chain OS=Homo sapiens GN=COL1A1 PE=1 SV=5	P02452	1	73	223	353	0.00431	0.641	GDRGETGPAGPpGApGApGApGPVGPAGK	0.997	34.6	27.9	21.1		p12: Oxidation (+15.99), p15: Oxidation (+15.99), p18: Oxidation (+15.99), p21: Oxidation (+15.99)	1257.1	2512.19	2	-0.1997	73824
Control-1	Collagen alpha-1(I) chain OS=Homo sapiens GN=COL1A1 PE=1 SV=5	P02452	1	73	223	353	0.00431	0.641	GDRGETGPAGPpGApGApGApGPVGPAGK	0.997	40.4	28	32.8		p12: Oxidation (+15.99), p15: Oxidation (+15.99), p18: Oxidation (+15.99), p21: Oxidation (+15.99)	838.406	2512.2	3	0.4226	728030
Control-1	Collagen alpha-1(I) chain OS=Homo sapiens GN=COL1A1 PE=1 SV=5	P02452	1	73	223	353	0.00431	0.641	GDRGETGPAGppGApGApGApGPVGPAGK	0.997	39.9	27.6	34.6		p11: Oxidation (+15.99), p12: Oxidation (+15.99), p15: Oxidation (+15.99), p18: Oxidation (+15.99), p21: Oxidation (+15.99)	843.738	2528.19	3	0.5998	677148
Control-1	Collagen alpha-1(I) chain OS=Homo sapiens GN=COL1A1 PE=1 SV=5	P02452	1	73	223	353	0.00431	0.641	GDTGAKGEPGpVGVQGpPGPAGEEGK	0.997	52.1	27.4	25.2		p11: Oxidation (+15.99), p17: Oxidation (+15.99)	1189.07	2376.13	2	2.452	88128.7
Control-1	Collagen alpha-1(I) chain OS=Homo sapiens GN=COL1A1 PE=1 SV=5	P02452	1	73	223	353	0.00431	0.641	GDTGAKGEPGpVGVQGpPGPAGEEGK	0.997	49.5	27.3	22.4		p11: Oxidation (+15.99), p17: Oxidation (+15.99)	793.048	2376.12	3	1.419	1572430
Control-1	Collagen alpha-1(I) chain OS=Homo sapiens GN=COL1A1 PE=1 SV=5	P02452	1	73	223	353	0.00431	0.641	GDTGAkGEpGPVGVQGPPGPAGEEGk	0.997	56.5	26.8	32.5		k6: Oxidation (+15.99), p9: Oxidation (+15.99), k26: Oxidation (+15.99)	1197.07	2392.12	2	0.8913	75552.6
Control-1	Collagen alpha-1(I) chain OS=Homo sapiens GN=COL1A1 PE=1 SV=5	P02452	1	73	223	353	0.00431	0.641	GDTGAkGEpGPVGVQGPPGPAGEEGkR	0.98	20.4	27.7	6.01		k6: Oxidation (+15.99), p9: Oxidation (+15.99), k26: Oxidation (+15.99)	638.061	2548.22	4	0.09455	1050120
Control-1	Collagen alpha-1(I) chain OS=Homo sapiens GN=COL1A1 PE=1 SV=5	P02452	1	73	223	353	0.00431	0.641	GDTGAKGEpGpVGVQGppGPAGEEGKR	0.983	20.5	27.3	9.6		p9: Oxidation (+15.99), p11: Oxidation (+15.99), p17: Oxidation (+15.99), p18: Oxidation (+15.99)	642.06	2564.21	4	0.7508	616604
Control-1	Collagen alpha-1(I) chain OS=Homo sapiens GN=COL1A1 PE=1 SV=5	P02452	1	73	223	353	0.00431	0.641	GDTGAKGEpGpVGVQGpPGPAGEEGKR	0.993	26.6	27.8	18.9		p9: Oxidation (+15.99), p11: Oxidation (+15.99), p17: Oxidation (+15.99)	850.415	2548.22	3	2.855	484212
Control-1	Collagen alpha-1(I) chain OS=Homo sapiens GN=COL1A1 PE=1 SV=5	P02452	1	73	223	353	0.00431	0.641	GDTGAKGEPGpVGVQGpPGPAGEEGKR	0.997	26.4	27.8	3.56		p11: Oxidation (+15.99), p17: Oxidation (+15.99)	634.063	2532.22	4	0.409	1947730
Control-1	Collagen alpha-1(I) chain OS=Homo sapiens GN=COL1A1 PE=1 SV=5	P02452	1	73	223	353	0.00431	0.641	GDTGAKGEPGpVGVQGpPGPAGEEGKR	0.997	55.3	27.8	20.8		p11: Oxidation (+15.99), p17: Oxidation (+15.99)	1267.12	2532.22	2	-0.1153	72374.1
Control-1	Collagen alpha-1(I) chain OS=Homo sapiens GN=COL1A1 PE=1 SV=5	P02452	1	73	223	353	0.00431	0.641	GDTGAKGEPGpVGVQGpPGPAGEEGKR	0.997	46.4	27.9	29.1		p11: Oxidation (+15.99), p17: Oxidation (+15.99)	845.081	2532.22	3	-0.4808	639121
Control-1	Collagen alpha-1(I) chain OS=Homo sapiens GN=COL1A1 PE=1 SV=5	P02452	1	73	223	353	0.00431	0.641	GEpGDAGAkGDAGPPGPAGPAGPPGpIGNVGApGAk	0.966	25.2	27.2	19.6		p3: Oxidation (+15.99), k9: Oxidation (+15.99), p26: Oxidation (+15.99), p33: Oxidation (+15.99), k36: Oxidation (+15.99)	1032.49	3094.45	3	-3.254	368493
Control-1	Collagen alpha-1(I) chain OS=Homo sapiens GN=COL1A1 PE=1 SV=5	P02452	1	73	223	353	0.00431	0.641	GEpGpPGPAGAAGPAGNPGADGQPGAk	0.978	19.2	25.8	1.15		p3: Oxidation (+15.99), p5: Oxidation (+15.99), k27: Oxidation (+15.99)	767.357	2299.05	3	0.5683	1228680
Control-1	Collagen alpha-1(I) chain OS=Homo sapiens GN=COL1A1 PE=1 SV=5	P02452	1	73	223	353	0.00431	0.641	GEpGpPGPAGAAGPAGNpGADGQpGAk	0.991	23.6	25	11		p3: Oxidation (+15.99), p5: Oxidation (+15.99), p18: Oxidation (+15.99), p24: Oxidation (+15.99), k27: Oxidation (+15.99)	1166.53	2331.04	2	1.682	92641.8
Control-1	Collagen alpha-1(I) chain OS=Homo sapiens GN=COL1A1 PE=1 SV=5	P02452	1	73	223	353	0.00431	0.641	GEpGpPGPAGAAGpAGNpGADGQpGAk	0.993	59.4	25	14.4		p3: Oxidation (+15.99), p5: Oxidation (+15.99), p14: Oxidation (+15.99), p18: Oxidation (+15.99), p24: Oxidation (+15.99), k27: Oxidation (+15.99)	1174.53	2347.04	2	3.002	75705.5
Control-1	Collagen alpha-1(I) chain OS=Homo sapiens GN=COL1A1 PE=1 SV=5	P02452	1	73	223	353	0.00431	0.641	GEPGPpGpAGAAGpAGNpGADGQpGAK	0.995	23.7	25	22.2		p6: Oxidation (+15.99), p8: Oxidation (+15.99), p14: Oxidation (+15.99), p18: Oxidation (+15.99), p24: Oxidation (+15.99)	778.02	2331.04	3	0.3203	372226
Control-1	Collagen alpha-1(I) chain OS=Homo sapiens GN=COL1A1 PE=1 SV=5	P02452	1	73	223	353	0.00431	0.641	GEPGPpGpAGAAGpAGNpGADGQpGAK	0.996	24.3	25	21.5		p6: Oxidation (+15.99), p8: Oxidation (+15.99), p14: Oxidation (+15.99), p18: Oxidation (+15.99), p24: Oxidation (+15.99)	778.02	2331.04	3	0.3975	363284
Control-1	Collagen alpha-1(I) chain OS=Homo sapiens GN=COL1A1 PE=1 SV=5	P02452	1	73	223	353	0.00431	0.641	GEpGpPGPAGAAGPAGNpGADGQpGAk	0.997	34.8	25.3	20.9		p3: Oxidation (+15.99), p5: Oxidation (+15.99), p18: Oxidation (+15.99), p24: Oxidation (+15.99), k27: Oxidation (+15.99)	1166.53	2331.04	2	2.626	107130
Control-1	Collagen alpha-1(I) chain OS=Homo sapiens GN=COL1A1 PE=1 SV=5	P02452	1	73	223	353	0.00431	0.641	GEPGPpGpAGAAGpAGNpGADGQpGAK	0.997	32.7	25.1	27.6		p6: Oxidation (+15.99), p8: Oxidation (+15.99), p14: Oxidation (+15.99), p18: Oxidation (+15.99), p24: Oxidation (+15.99)	1166.53	2331.04	2	1.365	81528.3
Control-1	Collagen alpha-1(I) chain OS=Homo sapiens GN=COL1A1 PE=1 SV=5	P02452	1	73	223	353	0.00431	0.641	GEpGpPGPAGAAGPAGNPGADGQpGAk	0.997	27.1	25.5	7.87		p3: Oxidation (+15.99), p5: Oxidation (+15.99), p24: Oxidation (+15.99), k27: Oxidation (+15.99)	1158.53	2315.04	2	0.8713	1977700
Control-1	Collagen alpha-1(I) chain OS=Homo sapiens GN=COL1A1 PE=1 SV=5	P02452	1	73	223	353	0.00431	0.641	GEPGPpGpAGAAGpAGNpGADGQpGAk	0.997	39.8	25	2.56		p6: Oxidation (+15.99), p8: Oxidation (+15.99), p14: Oxidation (+15.99), p18: Oxidation (+15.99), p24: Oxidation (+15.99), k27: Oxidation (+15.99)	783.352	2347.03	3	1.049	1000560
Control-1	Collagen alpha-1(I) chain OS=Homo sapiens GN=COL1A1 PE=1 SV=5	P02452	1	73	223	353	0.00431	0.641	GEPGPpGpAGAAGpAGNpGADGQPGAK	0.997	41.9	25.4	20.7		p6: Oxidation (+15.99), p8: Oxidation (+15.99), p14: Oxidation (+15.99), p18: Oxidation (+15.99)	1158.53	2315.04	2	-0.1822	93409.2
Control-1	Collagen alpha-1(I) chain OS=Homo sapiens GN=COL1A1 PE=1 SV=5	P02452	1	73	223	353	0.00431	0.641	GEpGpPGPAGAAGPAGNPGADGQpGAk	0.997	32.5	25.5	4.78		p3: Oxidation (+15.99), p5: Oxidation (+15.99), p24: Oxidation (+15.99), k27: Oxidation (+15.99)	772.689	2315.04	3	0.8385	21467700
Control-1	Collagen alpha-1(I) chain OS=Homo sapiens GN=COL1A1 PE=1 SV=5	P02452	1	73	223	353	0.00431	0.641	GEPGPPGpAGAAGpAGNpGADGQpGAk	0.997	41.2	25	3.6		p8: Oxidation (+15.99), p14: Oxidation (+15.99), p18: Oxidation (+15.99), p24: Oxidation (+15.99), k27: Oxidation (+15.99)	778.02	2331.04	3	-0.00128	4204710
Control-1	Collagen alpha-1(I) chain OS=Homo sapiens GN=COL1A1 PE=1 SV=5	P02452	1	73	223	353	0.00431	0.641	GEpGpPGPAGAAGPAGNPGADGQpGAkGANGApGIAGApGFpGAR	0.975	24.4	26.6	2.13		p3: Oxidation (+15.99), p5: Oxidation (+15.99), p24: Oxidation (+15.99), k27: Oxidation (+15.99), p33: Oxidation (+15.99), p39: Oxidation (+15.99), p42: Oxidation (+15.99)	971.459	3881.81	4	3.122	689353
Control-1	Collagen alpha-1(I) chain OS=Homo sapiens GN=COL1A1 PE=1 SV=5	P02452	1	73	223	353	0.00431	0.641	GEPGPPGpAGAAGpAGNpGADGQpGAkGANGApGIAGApGFpGAR	0.99	24	25.7	2.91		p8: Oxidation (+15.99), p14: Oxidation (+15.99), p18: Oxidation (+15.99), p24: Oxidation (+15.99), k27: Oxidation (+15.99), p33: Oxidation (+15.99), p39: Oxidation (+15.99), p42: Oxidation (+15.99)	975.454	3897.79	4	-0.9731	1012010
Control-1	Collagen alpha-1(I) chain OS=Homo sapiens GN=COL1A1 PE=1 SV=5	P02452	1	73	223	353	0.00431	0.641	GEPGPpGpAGAAGpAGNpGADGQpGAkGANGApGIAGApGFpGAR	0.992	30.6	26.3	3.76		p6: Oxidation (+15.99), p8: Oxidation (+15.99), p14: Oxidation (+15.99), p18: Oxidation (+15.99), p24: Oxidation (+15.99), k27: Oxidation (+15.99), p33: Oxidation (+15.99), p39: Oxidation (+15.99), p42: Oxidation (+15.99)	979.462	3913.82	4	8.064	524896
Control-1	Collagen alpha-1(I) chain OS=Homo sapiens GN=COL1A1 PE=1 SV=5	P02452	1	73	223	353	0.00431	0.641	GEpGpPGPAGAAGPAGNpGADGQpGAkGANGApGIAGApGFpGAR	0.992	26.6	26.4	4.89		p3: Oxidation (+15.99), p5: Oxidation (+15.99), p18: Oxidation (+15.99), p24: Oxidation (+15.99), k27: Oxidation (+15.99), p33: Oxidation (+15.99), p39: Oxidation (+15.99), p42: Oxidation (+15.99)	975.459	3897.81	4	3.603	790363
Control-1	Collagen alpha-1(I) chain OS=Homo sapiens GN=COL1A1 PE=1 SV=5	P02452	1	73	223	353	0.00431	0.641	GEPGPPGpAGAAGpAGNpGADGQpGAkGANGApGIAGApGFpGAR	0.997	35.2	26.2	0.29		p8: Oxidation (+15.99), p14: Oxidation (+15.99), p18: Oxidation (+15.99), p24: Oxidation (+15.99), k27: Oxidation (+15.99), p33: Oxidation (+15.99), p39: Oxidation (+15.99), p42: Oxidation (+15.99)	975.457	3897.8	4	2.413	1514040
Control-1	Collagen alpha-1(I) chain OS=Homo sapiens GN=COL1A1 PE=1 SV=5	P02452	1	73	223	353	0.00431	0.641	GEpGpPGPAGAAGPAGNpGADGQpGAkGANGApGIAGApGFpGAR	0.997	33.8	25.8	12.4		p3: Oxidation (+15.99), p5: Oxidation (+15.99), p18: Oxidation (+15.99), p24: Oxidation (+15.99), k27: Oxidation (+15.99), p33: Oxidation (+15.99), p39: Oxidation (+15.99), p42: Oxidation (+15.99)	1300.27	3897.79	3	0.4904	289244
Control-1	Collagen alpha-1(I) chain OS=Homo sapiens GN=COL1A1 PE=1 SV=5	P02452	1	73	223	353	0.00431	0.641	GEpGpPGPAGAAGpAGNpGADGQpGAkGANGApGIAGApGFpGAR	0.997	37.7	25.8	4.76		p3: Oxidation (+15.99), p5: Oxidation (+15.99), p14: Oxidation (+15.99), p18: Oxidation (+15.99), p24: Oxidation (+15.99), k27: Oxidation (+15.99), p33: Oxidation (+15.99), p39: Oxidation (+15.99), p42: Oxidation (+15.99)	979.457	3913.8	4	3.324	1011350
Control-1	Collagen alpha-1(I) chain OS=Homo sapiens GN=COL1A1 PE=1 SV=5	P02452	1	73	223	353	0.00431	0.641	GEPGPPGpAGFAGppGADGQpGAK	0.99	22.5	25	6.67		p8: Oxidation (+15.99), p14: Oxidation (+15.99), p15: Oxidation (+15.99), p21: Oxidation (+15.99)	1075.49	2148.97	2	0.9944	1706330
Control-1	Collagen alpha-1(I) chain OS=Homo sapiens GN=COL1A1 PE=1 SV=5	P02452	1	73	223	353	0.00431	0.641	GEPGPPGpAGFAGppGADGQpGAkGEpGDAGAK	0.989	21.4	25	15.5		p8: Oxidation (+15.99), p14: Oxidation (+15.99), p15: Oxidation (+15.99), p21: Oxidation (+15.99), k24: Oxidation (+15.99), p27: Oxidation (+15.99)	988.78	2963.32	3	0.6045	329777
Control-1	Collagen alpha-1(I) chain OS=Homo sapiens GN=COL1A1 PE=1 SV=5	P02452	1	73	223	353	0.00431	0.641	GEPGpTGLpGPpGER	0.991	23.6	26.1	0		p5: Oxidation (+15.99), p9: Oxidation (+15.99), p12: Oxidation (+15.99)	489.236	1464.69	3	1.165	1807580
Control-1	Collagen alpha-1(I) chain OS=Homo sapiens GN=COL1A1 PE=1 SV=5	P02452	1	73	223	353	0.00431	0.641	GEpGPTGLpGPpGER	0.997	60.9	26.1	10.9		p3: Oxidation (+15.99), p9: Oxidation (+15.99), p12: Oxidation (+15.99)	733.35	1464.69	2	0.5001	123667000
Control-1	Collagen alpha-1(I) chain OS=Homo sapiens GN=COL1A1 PE=1 SV=5	P02452	1	73	223	353	0.00431	0.641	GEpGPTGLPGppGER	0.997	27.4	26.1	0		p3: Oxidation (+15.99), p11: Oxidation (+15.99), p12: Oxidation (+15.99)	733.349	1464.68	2	-0.4141	1685960
Control-1	Collagen alpha-1(I) chain OS=Homo sapiens GN=COL1A1 PE=1 SV=5	P02452	1	73	223	353	0.00431	0.641	GEpGPTGLpGPpGER	0.997	48.7	26.2	6.46		p3: Oxidation (+15.99), p9: Oxidation (+15.99), p12: Oxidation (+15.99)	733.35	1464.69	2	0.2409	2347180
Control-1	Collagen alpha-1(I) chain OS=Homo sapiens GN=COL1A1 PE=1 SV=5	P02452	1	73	223	353	0.00431	0.641	GEpGPTGLpGppGER	0.997	37.3	25.3	14		p3: Oxidation (+15.99), p9: Oxidation (+15.99), p11: Oxidation (+15.99), p12: Oxidation (+15.99)	741.348	1480.68	2	1.281	873823
Control-1	Collagen alpha-1(I) chain OS=Homo sapiens GN=COL1A1 PE=1 SV=5	P02452	1	73	223	353	0.00431	0.641	GEpGPTGLPGppGER	0.997	38.4	26.1	2.27		p3: Oxidation (+15.99), p11: Oxidation (+15.99), p12: Oxidation (+15.99)	733.349	1464.68	2	-0.5915	918142
Control-1	Collagen alpha-1(I) chain OS=Homo sapiens GN=COL1A1 PE=1 SV=5	P02452	1	73	223	353	0.00431	0.641	GEpGPVGVQGPpGPAGEEGK	0.997	52.6	27.1	7.65		p3: Oxidation (+15.99), p12: Oxidation (+15.99)	924.444	1846.87	2	1.325	1187600
Control-1	Collagen alpha-1(I) chain OS=Homo sapiens GN=COL1A1 PE=1 SV=5	P02452	1	73	223	353	0.00431	0.641	GEPGpVGVQGppGPAGEEGK	0.997	32.6	26.4	18.9		p5: Oxidation (+15.99), p11: Oxidation (+15.99), p12: Oxidation (+15.99)	932.439	1862.86	2	-0.7978	305013
Control-1	Collagen alpha-1(I) chain OS=Homo sapiens GN=COL1A1 PE=1 SV=5	P02452	1	73	223	353	0.00431	0.641	GEpGPVGVQGPpGPAGEEGKR	0.978	20.9	27.9	4.85		p3: Oxidation (+15.99), p12: Oxidation (+15.99)	668.664	2002.97	3	-0.3832	1185740
Control-1	Collagen alpha-1(I) chain OS=Homo sapiens GN=COL1A1 PE=1 SV=5	P02452	1	73	223	353	0.00431	0.641	GEPGpVGVQGppGPAGEEGKR	0.993	25	27.7	7.29		p5: Oxidation (+15.99), p11: Oxidation (+15.99), p12: Oxidation (+15.99)	673.997	2018.97	3	1.301	866820
Control-1	Collagen alpha-1(I) chain OS=Homo sapiens GN=COL1A1 PE=1 SV=5	P02452	1	73	223	353	0.00431	0.641	GEpGPVGVQGPpGPAGEEGKR	0.997	62.2	28.1	9.92		p3: Oxidation (+15.99), p12: Oxidation (+15.99)	668.665	2002.97	3	1.084	2205340
Control-1	Collagen alpha-1(I) chain OS=Homo sapiens GN=COL1A1 PE=1 SV=5	P02452	1	73	223	353	0.00431	0.641	GEpGPVGVQGPpGPAGEEGKR	0.997	54.5	28.1	1.9		p3: Oxidation (+15.99), p12: Oxidation (+15.99)	1002.49	2002.97	2	1.212	158926
Control-1	Collagen alpha-1(I) chain OS=Homo sapiens GN=COL1A1 PE=1 SV=5	P02452	1	73	223	353	0.00431	0.641	GEpGPVGVQGPpGPAGEEGKR	0.997	56.2	28	3.07		p3: Oxidation (+15.99), p12: Oxidation (+15.99)	1002.49	2002.97	2	1.032	491016
Control-1	Collagen alpha-1(I) chain OS=Homo sapiens GN=COL1A1 PE=1 SV=5	P02452	1	73	223	353	0.00431	0.641	GEPGpVGVQGppGPAGEEGKR	0.997	44	27.5	26		p5: Oxidation (+15.99), p11: Oxidation (+15.99), p12: Oxidation (+15.99)	1010.49	2018.97	2	-0.2114	142197
Control-1	Collagen alpha-1(I) chain OS=Homo sapiens GN=COL1A1 PE=1 SV=5	P02452	1	73	223	353	0.00431	0.641	GEpGPVGVQGPpGPAGEEGKR	0.997	37.6	27.9	6.54		p3: Oxidation (+15.99), p12: Oxidation (+15.99)	668.664	2002.97	3	-0.2934	1418430
Control-1	Collagen alpha-1(I) chain OS=Homo sapiens GN=COL1A1 PE=1 SV=5	P02452	1	73	223	353	0.00431	0.641	GEpGPVGVQGPPGPAGEEGKR	0.997	40.2	28.2	4		p3: Oxidation (+15.99)	663.332	1986.98	3	-0.5095	568116
Control-1	Collagen alpha-1(I) chain OS=Homo sapiens GN=COL1A1 PE=1 SV=5	P02452	1	73	223	353	0.00431	0.641	GEpGSpGENGApGQMGPR	0.984	92.9	25	15.1		p3: Oxidation (+15.99), p6: Oxidation (+15.99), p12: Oxidation (+15.99)	871.874	1741.73	2	0.1911	324291
Control-1	Collagen alpha-1(I) chain OS=Homo sapiens GN=COL1A1 PE=1 SV=5	P02452	1	73	223	353	0.00431	0.641	GEpGSpGENGApGQMGPR	0.997	53.7	25	22.5		p3: Oxidation (+15.99), p6: Oxidation (+15.99), p12: Oxidation (+15.99)	581.585	1741.73	3	-0.4378	821379
Control-1	Collagen alpha-1(I) chain OS=Homo sapiens GN=COL1A1 PE=1 SV=5	P02452	1	73	223	353	0.00431	0.641	GEpGSpGENGApGQmGPR	0.997	27.7	25	11.9		p3: Oxidation (+15.99), p6: Oxidation (+15.99), p12: Oxidation (+15.99), m15: Oxidation (+15.99)	879.871	1757.73	2	-0.3195	83211.7
Control-1	Collagen alpha-1(I) chain OS=Homo sapiens GN=COL1A1 PE=1 SV=5	P02452	1	73	223	353	0.00431	0.641	GEQGPAGSPGFQGLPGpAGppGEAGkpGEQGVpGDLGApGPSGAR	0.992	29.9	26.2	15.9		p17: Oxidation (+15.99), p20: Oxidation (+15.99), p21: Oxidation (+15.99), k26: Oxidation (+15.99), p27: Oxidation (+15.99), p33: Oxidation (+15.99), p39: Oxidation (+15.99)	1376.98	4127.93	3	6.141	206187
Control-1	Collagen alpha-1(I) chain OS=Homo sapiens GN=COL1A1 PE=1 SV=5	P02452	1	73	223	353	0.00431	0.641	GEQGPAGSPGFQGLpGpAGppGEAGkpGEQGVpGDLGApGPSGAR	0.993	28.5	25.3	28.4		p15: Oxidation (+15.99), p17: Oxidation (+15.99), p20: Oxidation (+15.99), p21: Oxidation (+15.99), k26: Oxidation (+15.99), p27: Oxidation (+15.99), p33: Oxidation (+15.99), p39: Oxidation (+15.99)	1036.99	4143.92	4	4.233	515407
Control-1	Collagen alpha-1(I) chain OS=Homo sapiens GN=COL1A1 PE=1 SV=5	P02452	1	73	223	353	0.00431	0.641	GEQGPAGSPGFQGLPGpAGppGEAGkpGEQGVpGDLGApGPSGAR	0.993	26.2	25.8	14.3		p17: Oxidation (+15.99), p20: Oxidation (+15.99), p21: Oxidation (+15.99), k26: Oxidation (+15.99), p27: Oxidation (+15.99), p33: Oxidation (+15.99), p39: Oxidation (+15.99)	1376.98	4127.92	3	3.3	436869
Control-1	Collagen alpha-1(I) chain OS=Homo sapiens GN=COL1A1 PE=1 SV=5	P02452	1	73	223	353	0.00431	0.641	GEQGPAGSPGFQGLPGpAGppGEAGkpGEQGVpGDLGApGPSGAR	0.996	30.1	25.8	21.7		p17: Oxidation (+15.99), p20: Oxidation (+15.99), p21: Oxidation (+15.99), k26: Oxidation (+15.99), p27: Oxidation (+15.99), p33: Oxidation (+15.99), p39: Oxidation (+15.99)	1376.98	4127.92	3	3.039	144155
Control-1	Collagen alpha-1(I) chain OS=Homo sapiens GN=COL1A1 PE=1 SV=5	P02452	1	73	223	353	0.00431	0.641	GEQGPAGSPGFQGLPGpAGppGEAGkpGEQGVpGDLGApGPSGAR	0.997	26.5	25.7	8.9		p17: Oxidation (+15.99), p20: Oxidation (+15.99), p21: Oxidation (+15.99), k26: Oxidation (+15.99), p27: Oxidation (+15.99), p33: Oxidation (+15.99), p39: Oxidation (+15.99)	1376.98	4127.91	3	0.1107	111143
Control-1	Collagen alpha-1(I) chain OS=Homo sapiens GN=COL1A1 PE=1 SV=5	P02452	1	73	223	353	0.00431	0.641	GESGPSGPAGPTGAR	0.993	74.6	25.7	47.8			649.31	1296.61	2	-0.6643	847625
Control-1	Collagen alpha-1(I) chain OS=Homo sapiens GN=COL1A1 PE=1 SV=5	P02452	1	73	223	353	0.00431	0.641	GESGPSGpAGPTGAR	0.997	44	25.1	16		p8: Oxidation (+15.99)	657.308	1312.6	2	0.52	288864
Control-1	Collagen alpha-1(I) chain OS=Homo sapiens GN=COL1A1 PE=1 SV=5	P02452	1	73	223	353	0.00431	0.641	GETGPAGPpGApGApGApGPVGPAGK	0.993	25.3	27.4	14.1		p9: Oxidation (+15.99), p12: Oxidation (+15.99), p15: Oxidation (+15.99), p18: Oxidation (+15.99)	729.024	2184.05	3	1.694	1158320
Control-1	Collagen alpha-1(I) chain OS=Homo sapiens GN=COL1A1 PE=1 SV=5	P02452	1	73	223	353	0.00431	0.641	GETGPAGPpGApGApGApGPVGPAGK	0.997	47.7	27.3	36.9		p9: Oxidation (+15.99), p12: Oxidation (+15.99), p15: Oxidation (+15.99), p18: Oxidation (+15.99)	1093.03	2184.05	2	0.9785	511990
Control-1	Collagen alpha-1(I) chain OS=Homo sapiens GN=COL1A1 PE=1 SV=5	P02452	1	73	223	353	0.00431	0.641	GETGPAGPpGApGApGAPGPVGPAGK	0.997	31.1	27.6	12.8		p9: Oxidation (+15.99), p12: Oxidation (+15.99), p15: Oxidation (+15.99)	1085.03	2168.05	2	0.09821	759119
Control-1	Collagen alpha-1(I) chain OS=Homo sapiens GN=COL1A1 PE=1 SV=5	P02452	1	73	223	353	0.00431	0.641	GETGPAGppGAPGAPGAPGPVGPAGK	0.997	35	28.1	5.45		p8: Oxidation (+15.99), p9: Oxidation (+15.99)	718.36	2152.06	3	0.7116	2586590
Control-1	Collagen alpha-1(I) chain OS=Homo sapiens GN=COL1A1 PE=1 SV=5	P02452	1	73	223	353	0.00431	0.641	GETGpAGRPGEVGPPGPpGpAGEk	0.971	21.5	27.4	3.63		p5: Oxidation (+15.99), p18: Oxidation (+15.99), p20: Oxidation (+15.99), k24: Oxidation (+15.99)	744.691	2231.05	3	1.78	1800930
Control-1	Collagen alpha-1(I) chain OS=Homo sapiens GN=COL1A1 PE=1 SV=5	P02452	1	73	223	353	0.00431	0.641	GETGPAGRPGEVGPpGppGPAGEK	0.982	20.7	27.8	3.15		p15: Oxidation (+15.99), p17: Oxidation (+15.99), p18: Oxidation (+15.99)	1108.53	2215.05	2	0.2225	99068.3
Control-1	Collagen alpha-1(I) chain OS=Homo sapiens GN=COL1A1 PE=1 SV=5	P02452	1	73	223	353	0.00431	0.641	GETGPAGRPGEVGppGppGPAGEK	0.982	22.2	27.2	1.38		p14: Oxidation (+15.99), p15: Oxidation (+15.99), p17: Oxidation (+15.99), p18: Oxidation (+15.99)	1116.53	2231.04	2	-0.5654	92138.6
Control-1	Collagen alpha-1(I) chain OS=Homo sapiens GN=COL1A1 PE=1 SV=5	P02452	1	73	223	353	0.00431	0.641	GETGPAGRpGEVGppGppGpAGEK	0.992	24.5	26	18		p9: Oxidation (+15.99), p14: Oxidation (+15.99), p15: Oxidation (+15.99), p17: Oxidation (+15.99), p18: Oxidation (+15.99), p20: Oxidation (+15.99)	755.352	2263.03	3	-0.9973	213699
Control-1	Collagen alpha-1(I) chain OS=Homo sapiens GN=COL1A1 PE=1 SV=5	P02452	1	73	223	353	0.00431	0.641	GETGPAGRpGEVGppGppGPAGEK	0.997	28.2	26.7	24.6		p9: Oxidation (+15.99), p14: Oxidation (+15.99), p15: Oxidation (+15.99), p17: Oxidation (+15.99), p18: Oxidation (+15.99)	750.022	2247.04	3	1.235	657974
Control-1	Collagen alpha-1(I) chain OS=Homo sapiens GN=COL1A1 PE=1 SV=5	P02452	1	73	223	353	0.00431	0.641	GETGPAGRpGEVGppGPPGPAGEK	0.997	28.9	27.8	5.45		p9: Oxidation (+15.99), p14: Oxidation (+15.99), p15: Oxidation (+15.99)	739.358	2215.05	3	1.018	3272710
Control-1	Collagen alpha-1(I) chain OS=Homo sapiens GN=COL1A1 PE=1 SV=5	P02452	1	73	223	353	0.00431	0.641	GETGPAGRpGEVGpPGPPGPAGEK	0.997	30.6	28	14.5		p9: Oxidation (+15.99), p14: Oxidation (+15.99)	734.027	2199.06	3	1.16	899941
Control-1	Collagen alpha-1(I) chain OS=Homo sapiens GN=COL1A1 PE=1 SV=5	P02452	1	73	223	353	0.00431	0.641	GETGPAGRpGEVGppGPPGPAGEK	0.997	28.5	27.8	6.36		p9: Oxidation (+15.99), p14: Oxidation (+15.99), p15: Oxidation (+15.99)	739.358	2215.05	3	0.2739	4119770
Control-1	Collagen alpha-1(I) chain OS=Homo sapiens GN=COL1A1 PE=1 SV=5	P02452	1	73	223	353	0.00431	0.641	GETGPAGRpGEVGppGPPGPAGEK	0.997	29.3	27.8	6.56		p9: Oxidation (+15.99), p14: Oxidation (+15.99), p15: Oxidation (+15.99)	1108.53	2215.05	2	0.1142	147706
Control-1	Collagen alpha-1(I) chain OS=Homo sapiens GN=COL1A1 PE=1 SV=5	P02452	1	73	223	353	0.00431	0.641	GETGPAGRPGEVGppGppGPAGEK	0.997	39.9	27.2	9.13		p14: Oxidation (+15.99), p15: Oxidation (+15.99), p17: Oxidation (+15.99), p18: Oxidation (+15.99)	1116.53	2231.04	2	-0.5654	125503
Control-1	Collagen alpha-1(I) chain OS=Homo sapiens GN=COL1A1 PE=1 SV=5	P02452	1	73	223	353	0.00431	0.641	GETGPAGRPGEVGPpGppGpAGEkGSpGADGpAGApGTPGPQGIAGQR	0.98	20.4	25.6	15.6		p15: Oxidation (+15.99), p17: Oxidation (+15.99), p18: Oxidation (+15.99), p20: Oxidation (+15.99), k24: Oxidation (+15.99), p27: Oxidation (+15.99), p32: Oxidation (+15.99), p36: Oxidation (+15.99)	1450.68	4349.02	3	1.063	33506.4
Control-1	Collagen alpha-1(I) chain OS=Homo sapiens GN=COL1A1 PE=1 SV=5	P02452	1	73	223	353	0.00431	0.641	GETGPAGRPGEVGPPGppGpAGEkGSpGADGpAGApGTpGPQGIAGQR	0.996	24.6	25.6	17.4		p17: Oxidation (+15.99), p18: Oxidation (+15.99), p20: Oxidation (+15.99), k24: Oxidation (+15.99), p27: Oxidation (+15.99), p32: Oxidation (+15.99), p36: Oxidation (+15.99), p39: Oxidation (+15.99)	1088.26	4349.02	4	0.4565	397081
Control-1	Collagen alpha-1(I) chain OS=Homo sapiens GN=COL1A1 PE=1 SV=5	P02452	1	73	223	353	0.00431	0.641	GETGPAGRPGEVGPPGppGpAGEkGSpGADGpAGAPGTPGPQGIAGQR	0.997	39.1	26.4	19.2		p17: Oxidation (+15.99), p18: Oxidation (+15.99), p20: Oxidation (+15.99), k24: Oxidation (+15.99), p27: Oxidation (+15.99), p32: Oxidation (+15.99)	1440.02	4317.04	3	2.478	53034.1
Control-1	Collagen alpha-1(I) chain OS=Homo sapiens GN=COL1A1 PE=1 SV=5	P02452	1	73	223	353	0.00431	0.641	GFpGADGVAGpK	0.984	20.7	26.2	0.83		p3: Oxidation (+15.99), p11: Oxidation (+15.99)	552.77	1103.53	2	0.6591	1743550
Control-1	Collagen alpha-1(I) chain OS=Homo sapiens GN=COL1A1 PE=1 SV=5	P02452	1	73	223	353	0.00431	0.641	GFpGADGVAGPK	0.99	23.2	26	22.6		p3: Oxidation (+15.99)	544.772	1087.53	2	-0.4198	1506430
Control-1	Collagen alpha-1(I) chain OS=Homo sapiens GN=COL1A1 PE=1 SV=5	P02452	1	73	223	353	0.00431	0.641	GFpGADGVAGPK	0.997	56.5	26.8	38.8		p3: Oxidation (+15.99)	544.773	1087.53	2	0.4805	15768300
Control-1	Collagen alpha-1(I) chain OS=Homo sapiens GN=COL1A1 PE=1 SV=5	P02452	1	73	223	353	0.00431	0.641	GFpGADGVAGPK	0.997	40.7	26.8	29.3		p3: Oxidation (+15.99)	544.773	1087.53	2	0.9398	2780030
Control-1	Collagen alpha-1(I) chain OS=Homo sapiens GN=COL1A1 PE=1 SV=5	P02452	1	73	223	353	0.00431	0.641	GFpGADGVAGPK	0.997	39.7	26.8	27.6		p3: Oxidation (+15.99)	544.772	1087.53	2	0.1498	27536100
Control-1	Collagen alpha-1(I) chain OS=Homo sapiens GN=COL1A1 PE=1 SV=5	P02452	1	73	223	353	0.00431	0.641	GFpGADGVAGPKGPAGER	0.997	49	27.1	46.1		p3: Oxidation (+15.99)	828.41	1654.81	2	-0.7833	491332
Control-1	Collagen alpha-1(I) chain OS=Homo sapiens GN=COL1A1 PE=1 SV=5	P02452	1	73	223	353	0.00431	0.641	GFpGLpGPSGEPGK	0.997	27.7	26.1	12.2		p3: Oxidation (+15.99), p6: Oxidation (+15.99)	664.828	1327.64	2	-0.08427	858818	P02458
Control-1	Collagen alpha-1(I) chain OS=Homo sapiens GN=COL1A1 PE=1 SV=5	P02452	1	73	223	353	0.00431	0.641	GFpGLpGPSGEPGk	0.997	44.3	26.4	0		p3: Oxidation (+15.99), p6: Oxidation (+15.99), k14: Oxidation (+15.99)	672.826	1343.64	2	1.155	1931920	P02458
Control-1	Collagen alpha-1(I) chain OS=Homo sapiens GN=COL1A1 PE=1 SV=5	P02452	1	73	223	353	0.00431	0.641	GFpGLPGPSGEPGK	0.997	29.8	26.4	21		p3: Oxidation (+15.99)	656.83	1311.65	2	-0.2415	1177020	P02458
Control-1	Collagen alpha-1(I) chain OS=Homo sapiens GN=COL1A1 PE=1 SV=5	P02452	1	73	223	353	0.00431	0.641	GFpGLpGPSGEPGk	0.997	47.7	26.3	0		p3: Oxidation (+15.99), p6: Oxidation (+15.99), k14: Oxidation (+15.99)	672.826	1343.64	2	0.6046	21607400	P02458
Control-1	Collagen alpha-1(I) chain OS=Homo sapiens GN=COL1A1 PE=1 SV=5	P02452	1	73	223	353	0.00431	0.641	GFPGLpGPSGEPGk	0.997	30.6	26.1	0		p6: Oxidation (+15.99), k14: Oxidation (+15.99)	664.828	1327.64	2	0.277	2327220	P02458
Control-1	Collagen alpha-1(I) chain OS=Homo sapiens GN=COL1A1 PE=1 SV=5	P02452	1	73	223	353	0.00431	0.641	GFPGLPGPSGEPGk	0.997	33.2	26.4	0		k14: Oxidation (+15.99)	656.831	1311.65	2	0.5965	2009900	P02458
Control-1	Collagen alpha-1(I) chain OS=Homo sapiens GN=COL1A1 PE=1 SV=5	P02452	1	73	223	353	0.00431	0.641	GFpGLpGPSGEPGK	0.997	34.7	26.1	9.62		p3: Oxidation (+15.99), p6: Oxidation (+15.99)	664.828	1327.64	2	0.277	6783780	P02458
Control-1	Collagen alpha-1(I) chain OS=Homo sapiens GN=COL1A1 PE=1 SV=5	P02452	1	73	223	353	0.00431	0.641	GFpGLpGPSGEpGK	0.997	36	25.8	3.27		p3: Oxidation (+15.99), p6: Oxidation (+15.99), p12: Oxidation (+15.99)	672.826	1343.64	2	0.2477	2082090	P02458
Control-1	Collagen alpha-1(I) chain OS=Homo sapiens GN=COL1A1 PE=1 SV=5	P02452	1	73	223	353	0.00431	0.641	GFSGLDGAk	0.995	23.9	25.9	20.2		k9: Oxidation (+15.99)	434.214	866.414	2	0.5799	997366
Control-1	Collagen alpha-1(I) chain OS=Homo sapiens GN=COL1A1 PE=1 SV=5	P02452	1	73	223	353	0.00431	0.641	GFSGLDGAK	0.997	35.1	25.3	31.5			426.217	850.419	2	0.7259	3061100
Control-1	Collagen alpha-1(I) chain OS=Homo sapiens GN=COL1A1 PE=1 SV=5	P02452	1	73	223	353	0.00431	0.641	GFSGLDGAK	0.997	35.5	26.1	28.9			426.217	850.419	2	0.2326	5520580
Control-1	Collagen alpha-1(I) chain OS=Homo sapiens GN=COL1A1 PE=1 SV=5	P02452	1	73	223	353	0.00431	0.641	GFSGLDGAK	0.997	38.7	26.1	35.8			426.217	850.419	2	0.5145	43012900
Control-1	Collagen alpha-1(I) chain OS=Homo sapiens GN=COL1A1 PE=1 SV=5	P02452	1	73	223	353	0.00431	0.641	GFSGLDGAkGDAGPAGPK	0.997	65.9	27.2	37.7		k9: Oxidation (+15.99)	809.398	1616.78	2	1.362	681696
Control-1	Collagen alpha-1(I) chain OS=Homo sapiens GN=COL1A1 PE=1 SV=5	P02452	1	73	223	353	0.00431	0.641	GFSGLDGAkGDAGPAGPK	0.997	42.6	27.4	23.9		k9: Oxidation (+15.99)	539.934	1616.78	3	0.437	2418400
Control-1	Collagen alpha-1(I) chain OS=Homo sapiens GN=COL1A1 PE=1 SV=5	P02452	1	73	223	353	0.00431	0.641	GFSGLQGppGppGSpGEQGPSGASGPAGPR	0.975	110	25.7	75.1		p8: Oxidation (+15.99), p9: Oxidation (+15.99), p11: Oxidation (+15.99), p12: Oxidation (+15.99), p15: Oxidation (+15.99)	1369.13	2736.24	2	0.08147	296379
Control-1	Collagen alpha-1(I) chain OS=Homo sapiens GN=COL1A1 PE=1 SV=5	P02452	1	73	223	353	0.00431	0.641	GFSGLQGPPGPpGSpGEQGPSGASGPAGPR	0.986	88.4	27.3	22.5		p12: Oxidation (+15.99), p15: Oxidation (+15.99)	1345.14	2688.26	2	1.044	246497
Control-1	Collagen alpha-1(I) chain OS=Homo sapiens GN=COL1A1 PE=1 SV=5	P02452	1	73	223	353	0.00431	0.641	GFSGLQGPPGppGSPGEQGPSGASGPAGPR	0.991	44.3	26	0.34		p11: Oxidation (+15.99), p12: Oxidation (+15.99)	897.084	2688.23	3	-8.727	750971
Control-1	Collagen alpha-1(I) chain OS=Homo sapiens GN=COL1A1 PE=1 SV=5	P02452	1	73	223	353	0.00431	0.641	GFSGLQGPpGppGSpGEQGPSGASGPAGPR	0.992	33.7	27.3	8.29		p9: Oxidation (+15.99), p11: Oxidation (+15.99), p12: Oxidation (+15.99), p15: Oxidation (+15.99)	907.762	2720.26	3	7.387	807397
Control-1	Collagen alpha-1(I) chain OS=Homo sapiens GN=COL1A1 PE=1 SV=5	P02452	1	73	223	353	0.00431	0.641	GFSGLQGPPGppGSpGEQGPSGASGPAGPR	0.993	68.3	26.7	8.48		p11: Oxidation (+15.99), p12: Oxidation (+15.99), p15: Oxidation (+15.99)	1353.13	2704.25	2	-1.06	168498
Control-1	Collagen alpha-1(I) chain OS=Homo sapiens GN=COL1A1 PE=1 SV=5	P02452	1	73	223	353	0.00431	0.641	GFSGLQGPPGppGSpGEQGPSGASGPAGPR	0.996	36	27.2	7.6		p11: Oxidation (+15.99), p12: Oxidation (+15.99), p15: Oxidation (+15.99)	1353.14	2704.26	2	3.095	288873
Control-1	Collagen alpha-1(I) chain OS=Homo sapiens GN=COL1A1 PE=1 SV=5	P02452	1	73	223	353	0.00431	0.641	GFSGLQGPpGppGSPGEQGPSGASGPAGPR	0.997	58.8	26.7	3.43		p9: Oxidation (+15.99), p11: Oxidation (+15.99), p12: Oxidation (+15.99)	902.422	2704.25	3	-1.199	1369240
Control-1	Collagen alpha-1(I) chain OS=Homo sapiens GN=COL1A1 PE=1 SV=5	P02452	1	73	223	353	0.00431	0.641	GFSGLQGPpGppGSPGEQGPSGASGPAGPR	0.997	65.2	26.9	6.43		p9: Oxidation (+15.99), p11: Oxidation (+15.99), p12: Oxidation (+15.99)	902.424	2704.25	3	0.8306	40567000
Control-1	Collagen alpha-1(I) chain OS=Homo sapiens GN=COL1A1 PE=1 SV=5	P02452	1	73	223	353	0.00431	0.641	GFSGLQGPpGppGSPGEQGPSGASGPAGPR	0.997	43.8	27.1	4.97		p9: Oxidation (+15.99), p11: Oxidation (+15.99), p12: Oxidation (+15.99)	902.425	2704.25	3	2.05	802492
Control-1	Collagen alpha-1(I) chain OS=Homo sapiens GN=COL1A1 PE=1 SV=5	P02452	1	73	223	353	0.00431	0.641	GFSGLQGPpGppGSpGEQGPSGASGPAGPR	0.997	62.5	26.6	17.3		p9: Oxidation (+15.99), p11: Oxidation (+15.99), p12: Oxidation (+15.99), p15: Oxidation (+15.99)	907.756	2720.25	3	0.9929	5540790
Control-1	Collagen alpha-1(I) chain OS=Homo sapiens GN=COL1A1 PE=1 SV=5	P02452	1	73	223	353	0.00431	0.641	GFSGLQGppGppGSpGEQGPSGASGPAGPR	0.997	61.2	25.8	36.7		p8: Oxidation (+15.99), p9: Oxidation (+15.99), p11: Oxidation (+15.99), p12: Oxidation (+15.99), p15: Oxidation (+15.99)	913.087	2736.24	3	0.5506	1144460
Control-1	Collagen alpha-1(I) chain OS=Homo sapiens GN=COL1A1 PE=1 SV=5	P02452	1	73	223	353	0.00431	0.641	GFSGLQGPPGppGSpGEQGPSGASGPAGPR	0.997	56	26.8	18.6		p11: Oxidation (+15.99), p12: Oxidation (+15.99), p15: Oxidation (+15.99)	677.069	2704.25	4	-0.0218	3045990
Control-1	Collagen alpha-1(I) chain OS=Homo sapiens GN=COL1A1 PE=1 SV=5	P02452	1	73	223	353	0.00431	0.641	GFSGLQGPPGppGSpGEQGPSGASGPAGPR	0.997	30	26.8	0.28		p11: Oxidation (+15.99), p12: Oxidation (+15.99), p15: Oxidation (+15.99)	902.423	2704.25	3	-0.04546	433620
Control-1	Collagen alpha-1(I) chain OS=Homo sapiens GN=COL1A1 PE=1 SV=5	P02452	1	73	223	353	0.00431	0.641	GFSGLQGPPGPpGSpGEQGPSGASGPAGPR	0.997	28.8	27.3	3.11		p12: Oxidation (+15.99), p15: Oxidation (+15.99)	897.092	2688.25	3	0.4656	582378
Control-1	Collagen alpha-1(I) chain OS=Homo sapiens GN=COL1A1 PE=1 SV=5	P02452	1	73	223	353	0.00431	0.641	GFSGLQGPpGppGSPGEQGPSGASGPAGPR	0.997	44.2	26.9	0.31		p9: Oxidation (+15.99), p11: Oxidation (+15.99), p12: Oxidation (+15.99)	902.424	2704.25	3	0.3649	565096
Control-1	Collagen alpha-1(I) chain OS=Homo sapiens GN=COL1A1 PE=1 SV=5	P02452	1	73	223	353	0.00431	0.641	GFSGLQGPpGPPGSPGEQGPSGASGPAGPR	0.997	38.2	27.5	0		p9: Oxidation (+15.99)	891.76	2672.26	3	-0.1058	547556
Control-1	Collagen alpha-1(I) chain OS=Homo sapiens GN=COL1A1 PE=1 SV=5	P02452	1	73	223	353	0.00431	0.641	GLPGppGApGpQGFQGppGEPGEPGASGPMGPR	0.979	19	25.3	3.14		p5: Oxidation (+15.99), p6: Oxidation (+15.99), p9: Oxidation (+15.99), p11: Oxidation (+15.99), p17: Oxidation (+15.99), p18: Oxidation (+15.99)	1034.14	3099.4	3	0.4651	16903500
Control-1	Collagen alpha-1(I) chain OS=Homo sapiens GN=COL1A1 PE=1 SV=5	P02452	1	73	223	353	0.00431	0.641	GLPGPPGApGpQGFQGppGEpGEpGASGPmGPR	0.981	24.7	25	5.02		p9: Oxidation (+15.99), p11: Oxidation (+15.99), p17: Oxidation (+15.99), p18: Oxidation (+15.99), p21: Oxidation (+15.99), p24: Oxidation (+15.99), m30: Oxidation (+15.99)	779.854	3115.39	4	-2.272	1334700
Control-1	Collagen alpha-1(I) chain OS=Homo sapiens GN=COL1A1 PE=1 SV=5	P02452	1	73	223	353	0.00431	0.641	GLPGPPGApGpQGFQGppGEpGEpGASGPMGPR	0.985	21.2	25.4	10.8		p9: Oxidation (+15.99), p11: Oxidation (+15.99), p17: Oxidation (+15.99), p18: Oxidation (+15.99), p21: Oxidation (+15.99), p24: Oxidation (+15.99)	775.858	3099.4	4	1.031	2178410
Control-1	Collagen alpha-1(I) chain OS=Homo sapiens GN=COL1A1 PE=1 SV=5	P02452	1	73	223	353	0.00431	0.641	GLTGPIGPpGPAGAPGDk	0.99	24.2	27.9	0		p9: Oxidation (+15.99), k18: Oxidation (+15.99)	530.943	1589.81	3	1.145	1425080
Control-1	Collagen alpha-1(I) chain OS=Homo sapiens GN=COL1A1 PE=1 SV=5	P02452	1	73	223	353	0.00431	0.641	GLTGPIGPpGPAGApGDK	0.997	56.9	28	1.01		p9: Oxidation (+15.99), p15: Oxidation (+15.99)	795.91	1589.81	2	0.4702	2960640
Control-1	Collagen alpha-1(I) chain OS=Homo sapiens GN=COL1A1 PE=1 SV=5	P02452	1	73	223	353	0.00431	0.641	GLTGPIGPPGpAGApGDKGESGPSGPAGPTGAR	0.966	71.9	28.1	23.2		p11: Oxidation (+15.99), p15: Oxidation (+15.99)	957.133	2868.38	3	-8.566	803678
Control-1	Collagen alpha-1(I) chain OS=Homo sapiens GN=COL1A1 PE=1 SV=5	P02452	1	73	223	353	0.00431	0.641	GLTGPIGPPGpAGAPGDKGESGPSGPAGPTGAR	0.969	21.4	28.2	0.92		p11: Oxidation (+15.99)	951.811	2852.41	3	1.751	1990730
Control-1	Collagen alpha-1(I) chain OS=Homo sapiens GN=COL1A1 PE=1 SV=5	P02452	1	73	223	353	0.00431	0.641	GLTGPIGppGpAGAPGDKGESGPSGPAGPTGAR	0.975	19.8	28.3	8.71		p8: Oxidation (+15.99), p9: Oxidation (+15.99), p11: Oxidation (+15.99)	962.473	2884.4	3	0.08215	694661
Control-1	Collagen alpha-1(I) chain OS=Homo sapiens GN=COL1A1 PE=1 SV=5	P02452	1	73	223	353	0.00431	0.641	GLTGPIGPPGpAGApGDKGESGPSGPAGPTGAR	0.979	22.2	28.2	0.05		p11: Oxidation (+15.99), p15: Oxidation (+15.99)	718.107	2868.4	4	-0.566	872156
Control-1	Collagen alpha-1(I) chain OS=Homo sapiens GN=COL1A1 PE=1 SV=5	P02452	1	73	223	353	0.00431	0.641	GLTGPIGPPGpAGApGDKGESGPSGPAGPTGAR	0.986	22.6	28.2	7.97		p11: Oxidation (+15.99), p15: Oxidation (+15.99)	1435.21	2868.4	2	-0.2621	142890
Control-1	Collagen alpha-1(I) chain OS=Homo sapiens GN=COL1A1 PE=1 SV=5	P02452	1	73	223	353	0.00431	0.641	GLTGPIGPPGpAGApGDKGESGPSGPAGPTGAR	0.986	22.3	28.2	0.7		p11: Oxidation (+15.99), p15: Oxidation (+15.99)	957.141	2868.4	3	0.2377	318401
Control-1	Collagen alpha-1(I) chain OS=Homo sapiens GN=COL1A1 PE=1 SV=5	P02452	1	73	223	353	0.00431	0.641	GLTGPIGPpGpAGAPGDKGESGPSGPAGPTGAR	0.992	33.7	28.2	4.21		p9: Oxidation (+15.99), p11: Oxidation (+15.99)	1435.2	2868.39	2	-5.538	109702
Control-1	Collagen alpha-1(I) chain OS=Homo sapiens GN=COL1A1 PE=1 SV=5	P02452	1	73	223	353	0.00431	0.641	GLTGPIGPPGpAGApGDKGESGPSGPAGPTGAR	0.994	56	28.1	22.4		p11: Oxidation (+15.99), p15: Oxidation (+15.99)	1435.21	2868.41	2	3.139	266767
Control-1	Collagen alpha-1(I) chain OS=Homo sapiens GN=COL1A1 PE=1 SV=5	P02452	1	73	223	353	0.00431	0.641	GLTGPIGPPGpAGApGDkGESGPSGPAGPTGAR	0.995	52.7	28.3	13.3		p11: Oxidation (+15.99), p15: Oxidation (+15.99), k18: Oxidation (+15.99)	962.471	2884.39	3	-1.956	454107
Control-1	Collagen alpha-1(I) chain OS=Homo sapiens GN=COL1A1 PE=1 SV=5	P02452	1	73	223	353	0.00431	0.641	GLTGPIGPPGpAGApGDkGESGPSGPAGPTGAR	0.996	26.3	28.3	6.01		p11: Oxidation (+15.99), p15: Oxidation (+15.99), k18: Oxidation (+15.99)	722.106	2884.39	4	-0.4918	3840690
Control-1	Collagen alpha-1(I) chain OS=Homo sapiens GN=COL1A1 PE=1 SV=5	P02452	1	73	223	353	0.00431	0.641	GLTGPIGPpGpAGApGDkGESGpSGPAGPTGAR	0.997	26.2	27.9	11.5		p9: Oxidation (+15.99), p11: Oxidation (+15.99), p15: Oxidation (+15.99), k18: Oxidation (+15.99), p23: Oxidation (+15.99)	973.136	2916.38	3	-0.3061	348493
Control-1	Collagen alpha-1(I) chain OS=Homo sapiens GN=COL1A1 PE=1 SV=5	P02452	1	73	223	353	0.00431	0.641	GLTGPIGPPGpAGApGDkGESGPSGPAGPTGAR	0.997	27.4	28.3	11.2		p11: Oxidation (+15.99), p15: Oxidation (+15.99), k18: Oxidation (+15.99)	962.474	2884.4	3	1.787	1303800
Control-1	Collagen alpha-1(I) chain OS=Homo sapiens GN=COL1A1 PE=1 SV=5	P02452	1	73	223	353	0.00431	0.641	GLTGPIGPpGpAGApGDKGESGPSGPAGPTGAR	0.997	42.5	28.3	4.47		p9: Oxidation (+15.99), p11: Oxidation (+15.99), p15: Oxidation (+15.99)	1443.2	2884.39	2	-1.125	83325.8
Control-1	Collagen alpha-1(I) chain OS=Homo sapiens GN=COL1A1 PE=1 SV=5	P02452	1	73	223	353	0.00431	0.641	GLTGPIGPPGpAGApGDKGESGPSGPAGPTGAR	0.997	30.6	28.2	6.49		p11: Oxidation (+15.99), p15: Oxidation (+15.99)	718.107	2868.4	4	-0.6496	1066210
Control-1	Collagen alpha-1(I) chain OS=Homo sapiens GN=COL1A1 PE=1 SV=5	P02452	1	73	223	353	0.00431	0.641	GLTGPIGPPGpAGApGDkGESGpSGPAGPTGAR	0.997	41.8	28.3	17.4		p11: Oxidation (+15.99), p15: Oxidation (+15.99), k18: Oxidation (+15.99), p23: Oxidation (+15.99)	967.806	2900.4	3	1.562	516469
Control-1	Collagen alpha-1(I) chain OS=Homo sapiens GN=COL1A1 PE=1 SV=5	P02452	1	73	223	353	0.00431	0.641	GLTGPIGPpGpAGApGDkGESGPSGPAGPTGAR	0.997	32.7	28.3	4.48		p9: Oxidation (+15.99), p11: Oxidation (+15.99), p15: Oxidation (+15.99), k18: Oxidation (+15.99)	726.105	2900.39	4	-0.5149	1200490
Control-1	Collagen alpha-1(I) chain OS=Homo sapiens GN=COL1A1 PE=1 SV=5	P02452	1	73	223	353	0.00431	0.641	GLTGPIGPPGpAGApGDKGESGPSGPAGPTGAR	0.997	50.4	28	14.3		p11: Oxidation (+15.99), p15: Oxidation (+15.99)	718.108	2868.4	4	0.619	8205880
Control-1	Collagen alpha-1(I) chain OS=Homo sapiens GN=COL1A1 PE=1 SV=5	P02452	1	73	223	353	0.00431	0.641	GLTGPIGPPGpAGApGDKGESGPSGPAGPTGAR	0.997	36.3	28.1	0.9		p11: Oxidation (+15.99), p15: Oxidation (+15.99)	957.142	2868.4	3	0.6873	50203200
Control-1	Collagen alpha-1(I) chain OS=Homo sapiens GN=COL1A1 PE=1 SV=5	P02452	1	73	223	353	0.00431	0.641	GLTGSpGSpGPDGK	0.997	66.1	25	22.4		p6: Oxidation (+15.99), p9: Oxidation (+15.99)	629.799	1257.58	2	-0.009502	615263
Control-1	Collagen alpha-1(I) chain OS=Homo sapiens GN=COL1A1 PE=1 SV=5	P02452	1	73	223	353	0.00431	0.641	GLTGSpGSPGPDGK	0.997	54.4	26.4	16.5		p6: Oxidation (+15.99)	621.802	1241.59	2	-0.4804	1216290
Control-1	Collagen alpha-1(I) chain OS=Homo sapiens GN=COL1A1 PE=1 SV=5	P02452	1	73	223	353	0.00431	0.641	GLTGSpGSpGPDGK	0.997	56.6	25	10.4		p6: Oxidation (+15.99), p9: Oxidation (+15.99)	629.799	1257.58	2	-0.1048	3606370
Control-1	Collagen alpha-1(I) chain OS=Homo sapiens GN=COL1A1 PE=1 SV=5	P02452	1	73	223	353	0.00431	0.641	GLTGSpGSpGPDGK	0.997	39.4	25	7.89		p6: Oxidation (+15.99), p9: Oxidation (+15.99)	629.799	1257.58	2	-0.7882	472205
Control-1	Collagen alpha-1(I) chain OS=Homo sapiens GN=COL1A1 PE=1 SV=5	P02452	1	73	223	353	0.00431	0.641	GLTGSpGSpGPDGK	0.997	49.3	25	9.93		p6: Oxidation (+15.99), p9: Oxidation (+15.99)	629.8	1257.58	2	0.6579	451715
Control-1	Collagen alpha-1(I) chain OS=Homo sapiens GN=COL1A1 PE=1 SV=5	P02452	1	73	223	353	0.00431	0.641	GLTGSpGSpGPDGK	0.997	46.6	25	16.6		p6: Oxidation (+15.99), p9: Oxidation (+15.99)	629.799	1257.58	2	0.08584	151618
Control-1	Collagen alpha-1(I) chain OS=Homo sapiens GN=COL1A1 PE=1 SV=5	P02452	1	73	223	353	0.00431	0.641	GLTGSpGSpGPDGK	0.997	45.2	25	10.1		p6: Oxidation (+15.99), p9: Oxidation (+15.99)	629.8	1257.58	2	0.5626	338705
Control-1	Collagen alpha-1(I) chain OS=Homo sapiens GN=COL1A1 PE=1 SV=5	P02452	1	73	223	353	0.00431	0.641	GLTGSpGSpGpDGkTGPPGPAGQDGRPGPpGppGAR	0.97	26.1	28	3.31		p6: Oxidation (+15.99), p9: Oxidation (+15.99), p11: Oxidation (+15.99), k14: Oxidation (+15.99), p30: Oxidation (+15.99), p32: Oxidation (+15.99), p33: Oxidation (+15.99)	1104.86	3311.57	3	8.071	225681
Control-1	Collagen alpha-1(I) chain OS=Homo sapiens GN=COL1A1 PE=1 SV=5	P02452	1	73	223	353	0.00431	0.641	GLTGSpGSpGPDGKTGPPGPAGQDGRPGppGppGAR	0.987	26.9	26.8	4.7		p6: Oxidation (+15.99), p9: Oxidation (+15.99), p29: Oxidation (+15.99), p30: Oxidation (+15.99), p32: Oxidation (+15.99), p33: Oxidation (+15.99)	1099.51	3295.52	3	-7.689	325379
Control-1	Collagen alpha-1(I) chain OS=Homo sapiens GN=COL1A1 PE=1 SV=5	P02452	1	73	223	353	0.00431	0.641	GNDGATGAAGpPGPTGPAGPPGFpGAVGAk	0.969	19.3	27.5	4.36		p11: Oxidation (+15.99), p24: Oxidation (+15.99), k30: Oxidation (+15.99)	850.075	2547.2	3	1.196	2776790
Control-1	Collagen alpha-1(I) chain OS=Homo sapiens GN=COL1A1 PE=1 SV=5	P02452	1	73	223	353	0.00431	0.641	GNDGATGAAGpPGPTGPAGPPGFpGAVGAk	0.988	22.4	27.5	8.35		p11: Oxidation (+15.99), p24: Oxidation (+15.99), k30: Oxidation (+15.99)	1274.61	2547.2	2	0.6487	367599
Control-1	Collagen alpha-1(I) chain OS=Homo sapiens GN=COL1A1 PE=1 SV=5	P02452	1	73	223	353	0.00431	0.641	GNDGATGAAGpPGPTGPAGPpGFpGAVGAk	0.991	32.3	26.7	27.4		p11: Oxidation (+15.99), p21: Oxidation (+15.99), p24: Oxidation (+15.99), k30: Oxidation (+15.99)	1282.6	2563.18	2	-5.086	193367
Control-1	Collagen alpha-1(I) chain OS=Homo sapiens GN=COL1A1 PE=1 SV=5	P02452	1	73	223	353	0.00431	0.641	GNDGATGAAGPPGPTGPAGppGFpGAVGAK	0.993	24.2	27.4	5.84		p20: Oxidation (+15.99), p21: Oxidation (+15.99), p24: Oxidation (+15.99)	1274.61	2547.2	2	0.3583	434463
Control-1	Collagen alpha-1(I) chain OS=Homo sapiens GN=COL1A1 PE=1 SV=5	P02452	1	73	223	353	0.00431	0.641	GNDGATGAAGpPGPTGPAGPpGFpGAVGAk	0.994	32.4	26.9	27.7		p11: Oxidation (+15.99), p21: Oxidation (+15.99), p24: Oxidation (+15.99), k30: Oxidation (+15.99)	855.403	2563.19	3	-3.068	1901690
Control-1	Collagen alpha-1(I) chain OS=Homo sapiens GN=COL1A1 PE=1 SV=5	P02452	1	73	223	353	0.00431	0.641	GNDGATGAAGPpGpTGPAGPPGFPGAVGAK	0.997	26.9	27.7	0.1		p12: Oxidation (+15.99), p14: Oxidation (+15.99)	1266.61	2531.21	2	0.8641	300486
Control-1	Collagen alpha-1(I) chain OS=Homo sapiens GN=COL1A1 PE=1 SV=5	P02452	1	73	223	353	0.00431	0.641	GNDGATGAAGpPGPTGPAGPPGFPGAVGAk	0.997	32.7	27.8	0.77		p11: Oxidation (+15.99), k30: Oxidation (+15.99)	1266.61	2531.21	2	1.828	304057
Control-1	Collagen alpha-1(I) chain OS=Homo sapiens GN=COL1A1 PE=1 SV=5	P02452	1	73	223	353	0.00431	0.641	GNDGATGAAGPPGPTGPAGppGFpGAVGAkGEAGpQGPR	0.965	20.3	27.2	8.07		p20: Oxidation (+15.99), p21: Oxidation (+15.99), p24: Oxidation (+15.99), k30: Oxidation (+15.99), p35: Oxidation (+15.99)	1143.88	3428.6	3	1.661	266373
Control-1	Collagen alpha-1(I) chain OS=Homo sapiens GN=COL1A1 PE=1 SV=5	P02452	1	73	223	353	0.00431	0.641	GNDGATGAAGPPGPTGPAGppGFpGAVGAkGEAGPQGPR	0.971	20.9	27.8	5.97		p20: Oxidation (+15.99), p21: Oxidation (+15.99), p24: Oxidation (+15.99), k30: Oxidation (+15.99)	1138.54	3412.6	3	-0.7142	1290770
Control-1	Collagen alpha-1(I) chain OS=Homo sapiens GN=COL1A1 PE=1 SV=5	P02452	1	73	223	353	0.00431	0.641	GNDGATGAAGPpGpTGpAGppGFpGAVGAKGEAGPQGPR	0.991	29.6	27.4	8.97		p12: Oxidation (+15.99), p14: Oxidation (+15.99), p17: Oxidation (+15.99), p20: Oxidation (+15.99), p21: Oxidation (+15.99), p24: Oxidation (+15.99)	1149.21	3444.62	3	8.263	317053
Control-1	Collagen alpha-1(I) chain OS=Homo sapiens GN=COL1A1 PE=1 SV=5	P02452	1	73	223	353	0.00431	0.641	GNDGATGAAGPPGPTGPAGppGFpGAVGAkGEAGPQGPR	0.997	29.1	27.7	3.72		p20: Oxidation (+15.99), p21: Oxidation (+15.99), p24: Oxidation (+15.99), k30: Oxidation (+15.99)	854.158	3412.6	4	-0.02753	1454340
Control-1	Collagen alpha-1(I) chain OS=Homo sapiens GN=COL1A1 PE=1 SV=5	P02452	1	73	223	353	0.00431	0.641	GNDGATGAAGpPGPTGPAGPPGFPGAVGAkGEAGpQGpR	0.997	31.4	27.6	0.47		p11: Oxidation (+15.99), k30: Oxidation (+15.99), p35: Oxidation (+15.99), p38: Oxidation (+15.99)	1138.54	3412.6	3	0.2525	817563
Control-1	Collagen alpha-1(I) chain OS=Homo sapiens GN=COL1A1 PE=1 SV=5	P02452	1	73	223	353	0.00431	0.641	GPAGPQGPR	0.997	36	26.5	12.1			418.722	835.43	2	-0.002322	948841
Control-1	Collagen alpha-1(I) chain OS=Homo sapiens GN=COL1A1 PE=1 SV=5	P02452	1	73	223	353	0.00431	0.641	GPAGPQGPRGDKGETGEQGDR	0.973	20.7	26.7	20.7			689.326	2064.96	3	-0.6621	126969
Control-1	Collagen alpha-1(I) chain OS=Homo sapiens GN=COL1A1 PE=1 SV=5	P02452	1	73	223	353	0.00431	0.641	GPAGPQGPRGDkGETGEQGDR	0.997	35.2	26.6	6.63		k12: Oxidation (+15.99)	694.659	2080.95	3	0.7863	281102
Control-1	Collagen alpha-1(I) chain OS=Homo sapiens GN=COL1A1 PE=1 SV=5	P02452	1	73	223	353	0.00431	0.641	GPPGPmGppGLAGpPGESGR	0.971	18.6	26.4	0		m6: Oxidation (+15.99), p8: Oxidation (+15.99), p9: Oxidation (+15.99), p14: Oxidation (+15.99)	616.957	1847.85	3	1.023	1620510
Control-1	Collagen alpha-1(I) chain OS=Homo sapiens GN=COL1A1 PE=1 SV=5	P02452	1	73	223	353	0.00431	0.641	GpPGPmGPPGLAGPpGESGR	0.975	18.6	26.9	1.14		p2: Oxidation (+15.99), m6: Oxidation (+15.99), p15: Oxidation (+15.99)	611.625	1831.85	3	0.293	956556
Control-1	Collagen alpha-1(I) chain OS=Homo sapiens GN=COL1A1 PE=1 SV=5	P02452	1	73	223	353	0.00431	0.641	GppGPmGPPGLAGPpGESGR	0.978	23	26.7	1.86		p2: Oxidation (+15.99), p3: Oxidation (+15.99), m6: Oxidation (+15.99), p15: Oxidation (+15.99)	616.958	1847.85	3	2.013	1561690
Control-1	Collagen alpha-1(I) chain OS=Homo sapiens GN=COL1A1 PE=1 SV=5	P02452	1	73	223	353	0.00431	0.641	GpPGPMGPPGLAGPpGESGR	0.986	91.3	27.2	24.3		p2: Oxidation (+15.99), p15: Oxidation (+15.99)	908.937	1815.86	2	0.6649	8427600
Control-1	Collagen alpha-1(I) chain OS=Homo sapiens GN=COL1A1 PE=1 SV=5	P02452	1	73	223	353	0.00431	0.641	GppGpMGpPGLAGPpGESGR	0.992	25.5	25.6	0.34		p2: Oxidation (+15.99), p3: Oxidation (+15.99), p5: Oxidation (+15.99), p8: Oxidation (+15.99), p15: Oxidation (+15.99)	932.927	1863.84	2	-2.036	291426
Control-1	Collagen alpha-1(I) chain OS=Homo sapiens GN=COL1A1 PE=1 SV=5	P02452	1	73	223	353	0.00431	0.641	GPPGPmGPpGLAGpPGESGR	0.997	25.8	26.9	0.15		m6: Oxidation (+15.99), p9: Oxidation (+15.99), p14: Oxidation (+15.99)	611.625	1831.85	3	-0.3126	2433360
Control-1	Collagen alpha-1(I) chain OS=Homo sapiens GN=COL1A1 PE=1 SV=5	P02452	1	73	223	353	0.00431	0.641	GpPGPMGPPGLAGPpGESGR	0.997	70	27.1	11.4		p2: Oxidation (+15.99), p15: Oxidation (+15.99)	606.293	1815.86	3	0.04516	13035800
Control-1	Collagen alpha-1(I) chain OS=Homo sapiens GN=COL1A1 PE=1 SV=5	P02452	1	73	223	353	0.00431	0.641	GpPGPmGPPGLAGPpGESGR	0.997	34.4	26.9	1.06		p2: Oxidation (+15.99), m6: Oxidation (+15.99), p15: Oxidation (+15.99)	916.936	1831.86	2	2.768	588267
Control-1	Collagen alpha-1(I) chain OS=Homo sapiens GN=COL1A1 PE=1 SV=5	P02452	1	73	223	353	0.00431	0.641	GpPGPmGPPGLAGPpGESGR	0.997	32.7	26.9	8.08		p2: Oxidation (+15.99), m6: Oxidation (+15.99), p15: Oxidation (+15.99)	916.935	1831.86	2	1.971	837632
Control-1	Collagen alpha-1(I) chain OS=Homo sapiens GN=COL1A1 PE=1 SV=5	P02452	1	73	223	353	0.00431	0.641	GpPGPmGPPGLAGPpGESGR	0.997	62.6	26.9	26		p2: Oxidation (+15.99), m6: Oxidation (+15.99), p15: Oxidation (+15.99)	916.934	1831.85	2	0.8364	1242820
Control-1	Collagen alpha-1(I) chain OS=Homo sapiens GN=COL1A1 PE=1 SV=5	P02452	1	73	223	353	0.00431	0.641	GPPGPMGPpGLAGpPGESGR	0.997	51.9	27.1	24.8		p9: Oxidation (+15.99), p14: Oxidation (+15.99)	908.936	1815.86	2	0.05947	457652
Control-1	Collagen alpha-1(I) chain OS=Homo sapiens GN=COL1A1 PE=1 SV=5	P02452	1	73	223	353	0.00431	0.641	GpPGPmGPPGLAGPpGESGR	0.997	27.6	26.9	1.01		p2: Oxidation (+15.99), m6: Oxidation (+15.99), p15: Oxidation (+15.99)	916.935	1831.85	2	0.9674	509599
Control-1	Collagen alpha-1(I) chain OS=Homo sapiens GN=COL1A1 PE=1 SV=5	P02452	1	73	223	353	0.00431	0.641	GPPGPmGppGLAGpPGESGR	0.997	42.1	26.4	3.29		m6: Oxidation (+15.99), p8: Oxidation (+15.99), p9: Oxidation (+15.99), p14: Oxidation (+15.99)	924.931	1847.85	2	-0.4446	768322
Control-1	Collagen alpha-1(I) chain OS=Homo sapiens GN=COL1A1 PE=1 SV=5	P02452	1	73	223	353	0.00431	0.641	GpPGPmGPPGLAGPpGESGR	0.997	45.9	26.9	7.29		p2: Oxidation (+15.99), m6: Oxidation (+15.99), p15: Oxidation (+15.99)	611.625	1831.85	3	0.9968	2535820
Control-1	Collagen alpha-1(I) chain OS=Homo sapiens GN=COL1A1 PE=1 SV=5	P02452	1	73	223	353	0.00431	0.641	GPPGPmGPpGLAGpPGESGR	0.997	49.8	26.9	4.57		m6: Oxidation (+15.99), p9: Oxidation (+15.99), p14: Oxidation (+15.99)	916.934	1831.85	2	0.5636	19880900
Control-1	Collagen alpha-1(I) chain OS=Homo sapiens GN=COL1A1 PE=1 SV=5	P02452	1	73	223	353	0.00431	0.641	GpPGPmGPPGLAGppGESGR	0.997	35.2	26.6	3.79		p2: Oxidation (+15.99), m6: Oxidation (+15.99), p14: Oxidation (+15.99), p15: Oxidation (+15.99)	924.932	1847.85	2	1.329	482474
Control-1	Collagen alpha-1(I) chain OS=Homo sapiens GN=COL1A1 PE=1 SV=5	P02452	1	73	223	353	0.00431	0.641	GpPGPmGPPGLAGppGESGR	0.997	44.1	26.4	1.34		p2: Oxidation (+15.99), m6: Oxidation (+15.99), p14: Oxidation (+15.99), p15: Oxidation (+15.99)	924.932	1847.85	2	1.005	3925480
Control-1	Collagen alpha-1(I) chain OS=Homo sapiens GN=COL1A1 PE=1 SV=5	P02452	1	73	223	353	0.00431	0.641	GppGpMGpPGLAGPpGESGR	0.997	35.5	25.6	2.52		p2: Oxidation (+15.99), p3: Oxidation (+15.99), p5: Oxidation (+15.99), p8: Oxidation (+15.99), p15: Oxidation (+15.99)	932.928	1863.84	2	-0.4059	353478
Control-1	Collagen alpha-1(I) chain OS=Homo sapiens GN=COL1A1 PE=1 SV=5	P02452	1	73	223	353	0.00431	0.641	GpPGPmGPPGLAGPpGESGR	0.997	42.5	26.9	12.9		p2: Oxidation (+15.99), m6: Oxidation (+15.99), p15: Oxidation (+15.99)	611.625	1831.85	3	-0.001619	1319710
Control-1	Collagen alpha-1(I) chain OS=Homo sapiens GN=COL1A1 PE=1 SV=5	P02452	1	73	223	353	0.00431	0.641	GpPGPmGPPGLAGPpGESGR	0.997	38.9	26.9	16.7		p2: Oxidation (+15.99), m6: Oxidation (+15.99), p15: Oxidation (+15.99)	916.935	1831.86	2	1.229	510989
Control-1	Collagen alpha-1(I) chain OS=Homo sapiens GN=COL1A1 PE=1 SV=5	P02452	1	73	223	353	0.00431	0.641	GPpGPQGAR	0.996	25.1	25.4	16.4		p3: Oxidation (+15.99)	426.72	851.425	2	-0.7003	297403	P02458
Control-1	Collagen alpha-1(I) chain OS=Homo sapiens GN=COL1A1 PE=1 SV=5	P02452	1	73	223	353	0.00431	0.641	GpPGSAGAPGKDGLNGLPGPIGppGpR	0.994	26.1	28.4	23.6		p2: Oxidation (+15.99), p23: Oxidation (+15.99), p24: Oxidation (+15.99), p26: Oxidation (+15.99)	1227.62	2453.23	2	1.768	181967
Control-1	Collagen alpha-1(I) chain OS=Homo sapiens GN=COL1A1 PE=1 SV=5	P02452	1	73	223	353	0.00431	0.641	GPpGSAGApGkDGLNGLpGpIGpPGPR	0.996	33.8	28.7	33.8		p3: Oxidation (+15.99), p9: Oxidation (+15.99), k11: Oxidation (+15.99), p18: Oxidation (+15.99), p20: Oxidation (+15.99), p23: Oxidation (+15.99)	1243.62	2485.23	2	3.374	207271
Control-1	Collagen alpha-1(I) chain OS=Homo sapiens GN=COL1A1 PE=1 SV=5	P02452	1	73	223	353	0.00431	0.641	GpPGSAGAPGKDGLNGLPGPIGppGpR	0.997	30.2	28.4	16		p2: Oxidation (+15.99), p23: Oxidation (+15.99), p24: Oxidation (+15.99), p26: Oxidation (+15.99)	818.75	2453.23	3	-0.9282	1114940
Control-1	Collagen alpha-1(I) chain OS=Homo sapiens GN=COL1A1 PE=1 SV=5	P02452	1	73	223	353	0.00431	0.641	GPSGPQGPGGPpGPK	0.99	69.2	26.9	11.4		p12: Oxidation (+15.99)	651.825	1301.63	2	-1.548	747764
Control-1	Collagen alpha-1(I) chain OS=Homo sapiens GN=COL1A1 PE=1 SV=5	P02452	1	73	223	353	0.00431	0.641	GPSGPQGPGGPpGPK	0.994	79	26.7	14.1		p12: Oxidation (+15.99)	651.826	1301.64	2	0.1405	1410050
Control-1	Collagen alpha-1(I) chain OS=Homo sapiens GN=COL1A1 PE=1 SV=5	P02452	1	73	223	353	0.00431	0.641	GPSGPQGpGGppGPK	0.997	72.1	25.9	49.7		p8: Oxidation (+15.99), p11: Oxidation (+15.99), p12: Oxidation (+15.99)	667.821	1333.63	2	0.7141	200344
Control-1	Collagen alpha-1(I) chain OS=Homo sapiens GN=COL1A1 PE=1 SV=5	P02452	1	73	223	353	0.00431	0.641	GPSGPQGPGGppGPK	0.997	59.9	26.1	15.1		p11: Oxidation (+15.99), p12: Oxidation (+15.99)	659.824	1317.63	2	0.6583	653316
Control-1	Collagen alpha-1(I) chain OS=Homo sapiens GN=COL1A1 PE=1 SV=5	P02452	1	73	223	353	0.00431	0.641	GPSGPQGpGGppGpK	0.997	57	25	40.3		p8: Oxidation (+15.99), p11: Oxidation (+15.99), p12: Oxidation (+15.99), p14: Oxidation (+15.99)	675.818	1349.62	2	0.3095	106044
Control-1	Collagen alpha-1(I) chain OS=Homo sapiens GN=COL1A1 PE=1 SV=5	P02452	1	73	223	353	0.00431	0.641	GpSGPQGPGGPPGPk	0.997	52.6	26.1	41.5		p2: Oxidation (+15.99), k15: Oxidation (+15.99)	659.823	1317.63	2	0.2791	1442950
Control-1	Collagen alpha-1(I) chain OS=Homo sapiens GN=COL1A1 PE=1 SV=5	P02452	1	73	223	353	0.00431	0.641	GpSGPQGPGGPPGpk	0.997	28.2	25.9	9.31		p2: Oxidation (+15.99), p14: Oxidation (+15.99), k15: Oxidation (+15.99)	667.821	1333.63	2	0.7141	459520
Control-1	Collagen alpha-1(I) chain OS=Homo sapiens GN=COL1A1 PE=1 SV=5	P02452	1	73	223	353	0.00431	0.641	GPSGPQGPGGppGpK	0.997	42.7	25.2	2.62		p11: Oxidation (+15.99), p12: Oxidation (+15.99), p14: Oxidation (+15.99)	667.821	1333.63	2	0.1596	409066
Control-1	Collagen alpha-1(I) chain OS=Homo sapiens GN=COL1A1 PE=1 SV=5	P02452	1	73	223	353	0.00431	0.641	GPSGPQGPGGPpGpK	0.997	35.9	26	3.19		p12: Oxidation (+15.99), p14: Oxidation (+15.99)	659.823	1317.63	2	-1.01	586671
Control-1	Collagen alpha-1(I) chain OS=Homo sapiens GN=COL1A1 PE=1 SV=5	P02452	1	73	223	353	0.00431	0.641	GPSGPQGpGGpPGPK	0.997	39.3	26.1	6.29		p8: Oxidation (+15.99), p11: Oxidation (+15.99)	659.824	1317.63	2	0.5673	233432
Control-1	Collagen alpha-1(I) chain OS=Homo sapiens GN=COL1A1 PE=1 SV=5	P02452	1	73	223	353	0.00431	0.641	GPSGPQGPGGPPGpkGNSGEpGApGSK	0.997	36.5	26.1	14.2		p14: Oxidation (+15.99), k15: Oxidation (+15.99), p21: Oxidation (+15.99), p24: Oxidation (+15.99)	797.039	2388.1	3	0.5324	325848
Control-1	Collagen alpha-1(I) chain OS=Homo sapiens GN=COL1A1 PE=1 SV=5	P02452	1	73	223	353	0.00431	0.641	GPSGPQGPGGPPGpkGNSGEpGApGSK	0.997	38.4	26.7	34.7		p14: Oxidation (+15.99), k15: Oxidation (+15.99), p21: Oxidation (+15.99), p24: Oxidation (+15.99)	1195.06	2388.11	2	4.394	71006.3
Control-1	Collagen alpha-1(I) chain OS=Homo sapiens GN=COL1A1 PE=1 SV=5	P02452	1	73	223	353	0.00431	0.641	GPSGPQGPGGPPGpkGNSGEpGApGSK	0.997	39.2	26.1	25.8		p14: Oxidation (+15.99), k15: Oxidation (+15.99), p21: Oxidation (+15.99), p24: Oxidation (+15.99)	1195.05	2388.09	2	-0.0008271	77193.4
Control-1	Collagen alpha-1(I) chain OS=Homo sapiens GN=COL1A1 PE=1 SV=5	P02452	1	73	223	353	0.00431	0.641	GQAGVmGFpGPk	0.991	25.7	25	4.67		m6: Oxidation (+15.99), p9: Oxidation (+15.99), k12: Oxidation (+15.99)	597.283	1192.55	2	-2.469	1032290
Control-1	Collagen alpha-1(I) chain OS=Homo sapiens GN=COL1A1 PE=1 SV=5	P02452	1	73	223	353	0.00431	0.641	GQAGVMGFPGPk	0.997	46.8	26.2	0		k12: Oxidation (+15.99)	581.289	1160.56	2	-0.9788	4457020
Control-1	Collagen alpha-1(I) chain OS=Homo sapiens GN=COL1A1 PE=1 SV=5	P02452	1	73	223	353	0.00431	0.641	GQAGVmGFpGPK	0.997	62.6	26.1	13.9		m6: Oxidation (+15.99), p9: Oxidation (+15.99)	589.287	1176.56	2	-0.07809	1306400
Control-1	Collagen alpha-1(I) chain OS=Homo sapiens GN=COL1A1 PE=1 SV=5	P02452	1	73	223	353	0.00431	0.641	GQAGVmGFPGPk	0.997	48.5	26.1	0		m6: Oxidation (+15.99), k12: Oxidation (+15.99)	589.287	1176.56	2	-0.07809	1756070
Control-1	Collagen alpha-1(I) chain OS=Homo sapiens GN=COL1A1 PE=1 SV=5	P02452	1	73	223	353	0.00431	0.641	GQAGVMGFpGPK	0.997	29.3	26.2	9.92		p9: Oxidation (+15.99)	581.29	1160.57	2	-0.04903	1588620
Control-1	Collagen alpha-1(I) chain OS=Homo sapiens GN=COL1A1 PE=1 SV=5	P02452	1	73	223	353	0.00431	0.641	GQAGVmGFPGPk	0.997	35.5	26.1	0		m6: Oxidation (+15.99), k12: Oxidation (+15.99)	589.287	1176.56	2	0.1257	1244600
Control-1	Collagen alpha-1(I) chain OS=Homo sapiens GN=COL1A1 PE=1 SV=5	P02452	1	73	223	353	0.00431	0.641	GSAGPpGATGFpGAAGR	0.976	102	25.7	25.5		p6: Oxidation (+15.99), p12: Oxidation (+15.99)	730.35	1458.69	2	0.581	121322000
Control-1	Collagen alpha-1(I) chain OS=Homo sapiens GN=COL1A1 PE=1 SV=5	P02452	1	73	223	353	0.00431	0.641	GSAGPpGATGFpGAAGR	0.993	29.3	25.9	13.2		p6: Oxidation (+15.99), p12: Oxidation (+15.99)	730.353	1458.69	2	4.102	482546
Control-1	Collagen alpha-1(I) chain OS=Homo sapiens GN=COL1A1 PE=1 SV=5	P02452	1	73	223	353	0.00431	0.641	GSAGPpGATGFpGAAGR	0.997	66.5	25.8	15.5		p6: Oxidation (+15.99), p12: Oxidation (+15.99)	730.351	1458.69	2	1.088	2184900
Control-1	Collagen alpha-1(I) chain OS=Homo sapiens GN=COL1A1 PE=1 SV=5	P02452	1	73	223	353	0.00431	0.641	GSAGPpGATGFpGAAGR	0.997	35.1	25.7	10.6		p6: Oxidation (+15.99), p12: Oxidation (+15.99)	487.236	1458.69	3	0.2001	2654490
Control-1	Collagen alpha-1(I) chain OS=Homo sapiens GN=COL1A1 PE=1 SV=5	P02452	1	73	223	353	0.00431	0.641	GSEGPQGVR	0.997	35.7	25	26.6			443.723	885.431	2	-0.002191	758358
Control-1	Collagen alpha-1(I) chain OS=Homo sapiens GN=COL1A1 PE=1 SV=5	P02452	1	73	223	353	0.00431	0.641	GSEGpQGVRGEpGPPGPAGAAGPAGNpGADGQpGAk	0.976	22.5	26.2	9.05		p5: Oxidation (+15.99), p12: Oxidation (+15.99), p27: Oxidation (+15.99), p33: Oxidation (+15.99), k36: Oxidation (+15.99)	1067.16	3198.46	3	2.015	370538
Control-1	Collagen alpha-1(I) chain OS=Homo sapiens GN=COL1A1 PE=1 SV=5	P02452	1	73	223	353	0.00431	0.641	GSEGPQGVRGEPGPpGpAGAAGpAGNPGADGQPGAK	0.997	28.6	27.4	13.4		p15: Oxidation (+15.99), p17: Oxidation (+15.99), p23: Oxidation (+15.99)	1056.49	3166.46	3	-1.595	357082
Control-1	Collagen alpha-1(I) chain OS=Homo sapiens GN=COL1A1 PE=1 SV=5	P02452	1	73	223	353	0.00431	0.641	GSEGPQGVRGEPGPpGpAGAAGpAGNpGADGQpGAK	0.997	25.7	26.1	16.4		p15: Oxidation (+15.99), p17: Oxidation (+15.99), p23: Oxidation (+15.99), p27: Oxidation (+15.99), p33: Oxidation (+15.99)	1067.16	3198.45	3	-0.6104	142829
Control-1	Collagen alpha-1(I) chain OS=Homo sapiens GN=COL1A1 PE=1 SV=5	P02452	1	73	223	353	0.00431	0.641	GSpGADGpAGAPGTpGPQGIAGQR	0.965	17.7	26.5	3.09		p3: Oxidation (+15.99), p8: Oxidation (+15.99), p15: Oxidation (+15.99)	707.67	2119.99	3	-0.1617	429157
Control-1	Collagen alpha-1(I) chain OS=Homo sapiens GN=COL1A1 PE=1 SV=5	P02452	1	73	223	353	0.00431	0.641	GSpGADGpAGApGTPGPQGIAGQR	0.966	82.6	26.6	22.5		p3: Oxidation (+15.99), p8: Oxidation (+15.99), p12: Oxidation (+15.99)	1061	2119.99	2	2.675	310463
Control-1	Collagen alpha-1(I) chain OS=Homo sapiens GN=COL1A1 PE=1 SV=5	P02452	1	73	223	353	0.00431	0.641	GSpGADGPAGApGTPGpQGIAGQR	0.995	74	26.5	1.66		p3: Oxidation (+15.99), p12: Oxidation (+15.99), p17: Oxidation (+15.99)	1061	2119.99	2	1.175	624428
Control-1	Collagen alpha-1(I) chain OS=Homo sapiens GN=COL1A1 PE=1 SV=5	P02452	1	73	223	353	0.00431	0.641	GSPGADGPAGApGTPGpQGIAGQR	0.995	52.3	26.9	0		p12: Oxidation (+15.99), p17: Oxidation (+15.99)	1053.01	2104	2	2.598	507276
Control-1	Collagen alpha-1(I) chain OS=Homo sapiens GN=COL1A1 PE=1 SV=5	P02452	1	73	223	353	0.00431	0.641	GSPGADGPAGApGTPGPQGIAGQR	0.996	75.9	27.2	27.4		p12: Oxidation (+15.99)	1045.01	2088	2	0.528	428308
Control-1	Collagen alpha-1(I) chain OS=Homo sapiens GN=COL1A1 PE=1 SV=5	P02452	1	73	223	353	0.00431	0.641	GSPGADGPAGApGTPGPQGIAGQR	0.997	68.4	27.1	27.4		p12: Oxidation (+15.99)	1045.01	2088	2	1.112	284830
Control-1	Collagen alpha-1(I) chain OS=Homo sapiens GN=COL1A1 PE=1 SV=5	P02452	1	73	223	353	0.00431	0.641	GSpGADGPAGApGTPGPQGIAGQR	0.997	52.8	26.8	1.1		p3: Oxidation (+15.99), p12: Oxidation (+15.99)	1053	2103.99	2	-0.6518	362893
Control-1	Collagen alpha-1(I) chain OS=Homo sapiens GN=COL1A1 PE=1 SV=5	P02452	1	73	223	353	0.00431	0.641	GSpGADGpAGApGTpGPQGIAGQR	0.997	65.3	26.3	11.1		p3: Oxidation (+15.99), p8: Oxidation (+15.99), p12: Oxidation (+15.99), p15: Oxidation (+15.99)	1069	2135.99	2	0.8039	293053
Control-1	Collagen alpha-1(I) chain OS=Homo sapiens GN=COL1A1 PE=1 SV=5	P02452	1	73	223	353	0.00431	0.641	GSpGADGPAGApGTPGPQGIAGQR	0.997	55.7	26.8	16.5		p3: Oxidation (+15.99), p12: Oxidation (+15.99)	1053.01	2104	2	1.201	1182350
Control-1	Collagen alpha-1(I) chain OS=Homo sapiens GN=COL1A1 PE=1 SV=5	P02452	1	73	223	353	0.00431	0.641	GSPGADGpAGAPGTPGPQGIAGQR	0.997	53.5	27.2	6.36		p8: Oxidation (+15.99)	697.008	2088	3	0.8219	1384870
Control-1	Collagen alpha-1(I) chain OS=Homo sapiens GN=COL1A1 PE=1 SV=5	P02452	1	73	223	353	0.00431	0.641	GSpGADGPAGApGTpGPQGIAGQR	0.997	43.8	26.5	1.03		p3: Oxidation (+15.99), p12: Oxidation (+15.99), p15: Oxidation (+15.99)	707.671	2119.99	3	1.578	1653960
Control-1	Collagen alpha-1(I) chain OS=Homo sapiens GN=COL1A1 PE=1 SV=5	P02452	1	73	223	353	0.00431	0.641	GSPGADGPAGApGTpGPQGIAGQR	0.997	43	26.8	14		p12: Oxidation (+15.99), p15: Oxidation (+15.99)	702.339	2104	3	1.203	1360240
Control-1	Collagen alpha-1(I) chain OS=Homo sapiens GN=COL1A1 PE=1 SV=5	P02452	1	73	223	353	0.00431	0.641	GSPGADGPAGApGTPGPQGIAGQR	0.997	32	27.2	11.3		p12: Oxidation (+15.99)	697.008	2088	3	1.167	1137600
Control-1	Collagen alpha-1(I) chain OS=Homo sapiens GN=COL1A1 PE=1 SV=5	P02452	1	73	223	353	0.00431	0.641	GSpGADGPAGApGTPGPQGIAGQR	0.997	34.7	26.9	0.84		p3: Oxidation (+15.99), p12: Oxidation (+15.99)	702.339	2103.99	3	0.5045	3461600
Control-1	Collagen alpha-1(I) chain OS=Homo sapiens GN=COL1A1 PE=1 SV=5	P02452	1	73	223	353	0.00431	0.641	GSpGADGpAGApGTpGPQGIAGQR	0.997	41.4	26.3	15.9		p3: Oxidation (+15.99), p8: Oxidation (+15.99), p12: Oxidation (+15.99), p15: Oxidation (+15.99)	713.002	2135.98	3	0.5718	1053570
Control-1	Collagen alpha-1(I) chain OS=Homo sapiens GN=COL1A1 PE=1 SV=5	P02452	1	73	223	353	0.00431	0.641	GSPGADGPAGApGTpGPQGIAGQR	0.997	35.3	26.8	12.3		p12: Oxidation (+15.99), p15: Oxidation (+15.99)	702.339	2104	3	0.6756	3022390
Control-1	Collagen alpha-1(I) chain OS=Homo sapiens GN=COL1A1 PE=1 SV=5	P02452	1	73	223	353	0.00431	0.641	GSpGADGpAGApGTPGPQGIAGQR	0.997	38.1	26.5	10.3		p3: Oxidation (+15.99), p8: Oxidation (+15.99), p12: Oxidation (+15.99)	707.671	2119.99	3	1.055	675194
Control-1	Collagen alpha-1(I) chain OS=Homo sapiens GN=COL1A1 PE=1 SV=5	P02452	1	73	223	353	0.00431	0.641	GSPGADGpAGApGTPGPQGIAGQR	0.997	39.1	26.8	1.28		p8: Oxidation (+15.99), p12: Oxidation (+15.99)	702.34	2104	3	1.63	3440100
Control-1	Collagen alpha-1(I) chain OS=Homo sapiens GN=COL1A1 PE=1 SV=5	P02452	1	73	223	353	0.00431	0.641	GSpGEAGRpGEAGLpGAk	0.966	18.5	26.6	18.5		p3: Oxidation (+15.99), p9: Oxidation (+15.99), p15: Oxidation (+15.99), k18: Oxidation (+15.99)	836.401	1670.79	2	1.255	102921
Control-1	Collagen alpha-1(I) chain OS=Homo sapiens GN=COL1A1 PE=1 SV=5	P02452	1	73	223	353	0.00431	0.641	GSpGEAGRpGEAGLpGAK	0.977	22.2	27.1	7.79		p3: Oxidation (+15.99), p9: Oxidation (+15.99), p15: Oxidation (+15.99)	552.604	1654.79	3	-0.8594	1199690
Control-1	Collagen alpha-1(I) chain OS=Homo sapiens GN=COL1A1 PE=1 SV=5	P02452	1	73	223	353	0.00431	0.641	GSpGEAGRpGEAGLpGAK	0.997	46.4	27.2	14.2		p3: Oxidation (+15.99), p9: Oxidation (+15.99), p15: Oxidation (+15.99)	828.405	1654.8	2	2.255	103958
Control-1	Collagen alpha-1(I) chain OS=Homo sapiens GN=COL1A1 PE=1 SV=5	P02452	1	73	223	353	0.00431	0.641	GSpGEAGRpGEAGLpGAK	0.997	50.3	27.3	18		p3: Oxidation (+15.99), p9: Oxidation (+15.99), p15: Oxidation (+15.99)	828.404	1654.79	2	1.361	234110
Control-1	Collagen alpha-1(I) chain OS=Homo sapiens GN=COL1A1 PE=1 SV=5	P02452	1	73	223	353	0.00431	0.641	GSpGEAGRpGEAGLpGAK	0.997	34.3	27.2	13.9		p3: Oxidation (+15.99), p9: Oxidation (+15.99), p15: Oxidation (+15.99)	828.404	1654.79	2	1.59	197554
Control-1	Collagen alpha-1(I) chain OS=Homo sapiens GN=COL1A1 PE=1 SV=5	P02452	1	73	223	353	0.00431	0.641	GSpGEAGRpGEAGLpGAK	0.997	35.6	27	19.5		p3: Oxidation (+15.99), p9: Oxidation (+15.99), p15: Oxidation (+15.99)	828.403	1654.79	2	0.1166	143679
Control-1	Collagen alpha-1(I) chain OS=Homo sapiens GN=COL1A1 PE=1 SV=5	P02452	1	73	223	353	0.00431	0.641	GSPGEAGRpGEAGLpGAkGLTGSpGSpGPDGK	0.997	38.8	27.7	26.5		p9: Oxidation (+15.99), p15: Oxidation (+15.99), k18: Oxidation (+15.99), p24: Oxidation (+15.99), p27: Oxidation (+15.99)	965.795	2894.36	3	-0.4362	225944
Control-1	Collagen alpha-1(I) chain OS=Homo sapiens GN=COL1A1 PE=1 SV=5	P02452	1	73	223	353	0.00431	0.641	GSpGPAGPKGSpGEAGRpGEAGLpGAk	0.968	18.2	28	3.97		p3: Oxidation (+15.99), p12: Oxidation (+15.99), p18: Oxidation (+15.99), p24: Oxidation (+15.99), k27: Oxidation (+15.99)	609.8	2435.17	4	0.6613	728963
Control-1	Collagen alpha-1(I) chain OS=Homo sapiens GN=COL1A1 PE=1 SV=5	P02452	1	73	223	353	0.00431	0.641	GSPGPAGpkGSpGEAGRpGEAGLpGAK	0.986	23.1	27.9	23.1		p8: Oxidation (+15.99), k9: Oxidation (+15.99), p12: Oxidation (+15.99), p18: Oxidation (+15.99), p24: Oxidation (+15.99)	1218.59	2435.17	2	1.126	60800.2
[truncated: 418,638+ more rows]
